# Supplementary material for: Development of novel Aotus nancymaae Non-human primate model for the evaluation of Plasmodium vivax blood stage vaccines and immunoprophylactics
Source: Research Square preprint supplement (doi:10.21203/rs.3.rs-7660503/v1), 2025-10-08
Supplement: Supplementary file 1 [file 556f5b6dc308a795af14fd19.xlsx]

## Sheet: Table 1
Gene Name	Gene Id	Transcript Id	BioType	Variants impact				Variants effect
				HIGH	LOW	MODERATE	MODIFIER	Downstream gene variant	Initiator codon variant	Intron variant	Missense variant	Non-coding transcript exon variant	Splice acceptor variant	Splice donor variant	Splice region variant	Start lost	Stop gained	Stop lost	Stop retained variant	Synonymous variant	Upstream gene variant
PVP01_0100100	PVP01_0100100	PVP01_0100100.1	protein_coding	0	0	1	52	1	0	0	1	0	0	0	0	0	0	0	0	0	51
PVP01_0100200	PVP01_0100200	PVP01_0100200.1	protein_coding	0	0	1	65	17	0	0	1	0	0	0	0	0	0	0	0	0	48
PVP01_0100300	PVP01_0100300	PVP01_0100300.1	protein_coding	0	0	2	42	26	0	0	2	0	0	0	0	0	0	0	0	0	16
PVP01_0100400	PVP01_0100400	PVP01_0100400.1	protein_coding	1	2	4	33	17	0	3	4	0	0	0	1	0	0	1	0	1	14
PVP01_0100500	PVP01_0100500	PVP01_0100500.1	protein_coding	1	0	1	45	19	0	3	1	0	0	0	0	0	1	0	0	0	23
PVP01_0100600	PVP01_0100600	PVP01_0100600.1	protein_coding	0	1	2	25	11	0	0	2	0	0	0	0	0	0	0	0	1	14
PVP01_0100700	PVP01_0100700	PVP01_0100700.1	protein_coding	0	0	1	69	57	0	0	1	0	0	0	0	0	0	0	0	0	12
PVP01_0100800	PVP01_0100800	PVP01_0100800.1	protein_coding	0	4	2	72	20	0	0	2	0	0	0	0	0	0	0	0	4	52
PVP01_0100900	PVP01_0100900	PVP01_0100900.1	protein_coding	0	3	7	16	14	0	1	7	0	0	0	0	0	0	0	0	3	1
PVP01_0101000	PVP01_0101000	PVP01_0101000.1	protein_coding	0	0	0	20	20	0	0	0	0	0	0	0	0	0	0	0	0	0
PVP01_0101100	PVP01_0101100	PVP01_0101100.1	protein_coding	0	0	0	17	17	0	0	0	0	0	0	0	0	0	0	0	0	0
PVP01_0101200	PVP01_0101200	PVP01_0101200.1	protein_coding	0	0	0	29	22	0	0	0	0	0	0	0	0	0	0	0	0	7
PVP01_0101300	PVP01_0101300	PVP01_0101300.1	protein_coding	0	0	0	44	18	0	0	0	0	0	0	0	0	0	0	0	0	26
PVP01_0101400	PVP01_0101400	PVP01_0101400.1	protein_coding	0	2	12	30	22	0	0	12	0	0	0	0	0	0	0	0	2	8
PVP01_0101500	PVP01_0101500	PVP01_0101500.1	protein_coding	0	0	0	90	19	0	1	0	0	0	0	0	0	0	0	0	0	70
PVP01_0101600	PVP01_0101600	PVP01_0101600.1	protein_coding	0	3	10	65	57	0	0	10	0	0	0	0	0	0	0	0	3	8
PVP01_0101700	PVP01_0101700	PVP01_0101700.1	protein_coding	0	1	5	40	31	0	0	5	0	0	0	0	0	0	0	0	1	9
PVP01_0101800	PVP01_0101800	PVP01_0101800.1	protein_coding	1	5	14	47	13	0	5	14	0	0	0	2	0	1	0	0	5	29
PVP01_0101900	PVP01_0101900	PVP01_0101900.1	protein_coding	0	3	12	83	38	0	0	12	0	0	0	0	0	0	0	0	3	45
PVP01_0102000	PVP01_0102000	PVP01_0102000.1	protein_coding	1	2	2	147	38	0	3	2	0	0	1	0	0	0	0	0	2	107
PVP01_0102100	PVP01_0102100	PVP01_0102100.1	protein_coding	0	7	21	109	94	0	0	21	0	0	0	0	0	0	0	0	7	15
PVP01_0102200	PVP01_0102200	PVP01_0102200.1	protein_coding	0	0	21	91	79	0	0	3	0	0	0	0	0	0	0	0	0	12
PVP01_0102300	PVP01_0102300	PVP01_0102300.1	protein_coding	0	0	8	62	13	0	0	8	0	0	0	0	0	0	0	0	0	49
PVP01_0102400	PVP01_0102400	PVP01_0102400.1	protein_coding	0	6	21	41	28	0	0	21	0	0	0	1	0	0	0	0	6	13
PVP01_0102500	PVP01_0102500	PVP01_0102500.1	protein_coding	0	0	3	66	22	0	0	3	0	0	0	0	0	0	0	0	0	44
PVP01_0102600	PVP01_0102600	PVP01_0102600.1	protein_coding	0	0	1	35	14	0	0	1	0	0	0	0	0	0	0	0	0	21
PVP01_0102700	PVP01_0102700	PVP01_0102700.1	protein_coding	0	1	0	38	17	0	0	0	0	0	0	0	0	0	0	0	1	21
PVP01_0102800	PVP01_0102800	PVP01_0102800.1	protein_coding	0	2	2	36	22	0	0	2	0	0	0	0	0	0	0	0	2	14
PVP01_0102900	PVP01_0102900	PVP01_0102900.1	protein_coding	0	0	0	31	18	0	0	0	0	0	0	0	0	0	0	0	0	13
PVP01_0103000	PVP01_0103000	PVP01_0103000.1	protein_coding	0	0	0	30	9	0	0	0	0	0	0	0	0	0	0	0	0	21
PVP01_0103100	PVP01_0103100	PVP01_0103100.1	protein_coding	0	0	0	32	22	0	2	0	0	0	0	0	0	0	0	0	0	8
PVP01_0103200	PVP01_0103200	PVP01_0103200.1	protein_coding	0	4	6	23	10	0	0	6	0	0	0	0	0	0	0	0	4	13
PVP01_0103300	PVP01_0103300	PVP01_0103300.1	protein_coding	0	0	0	25	15	0	0	0	0	0	0	0	0	0	0	0	0	10
PVP01_0103400	PVP01_0103400	PVP01_0103400.1	protein_coding	1	4	8	20	9	0	0	8	0	0	0	0	0	1	0	0	4	11
PVP01_0103500	PVP01_0103500	PVP01_0103500.1	protein_coding	0	0	0	23	9	0	0	0	0	0	0	0	0	0	0	0	0	14
PVP01_0103600	PVP01_0103600	PVP01_0103600.1	protein_coding	0	1	4	28	16	0	0	4	0	0	0	0	0	0	0	0	1	12
PVP01_0103700	PVP01_0103700	PVP01_0103700.1	protein_coding	0	12	9	24	13	0	0	9	0	0	0	0	0	0	0	0	12	11
PVP01_0103800	PVP01_0103800	PVP01_0103800.1	protein_coding	0	5	0	23	13	0	3	0	0	0	0	3	0	0	0	0	3	9
PVP01_0103900	PVP01_0103900	PVP01_0103900.1	protein_coding	0	3	2	21	14	0	0	2	0	0	0	0	0	0	0	0	3	7
PVP01_0104000	PVP01_0104000	PVP01_0104000.1	protein_coding	0	0	1	20	6	0	0	1	0	0	0	0	0	0	0	0	0	14
PVP01_0104100	PVP01_0104100	PVP01_0104100.1	protein_coding	0	7	10	10	4	0	0	10	0	0	0	0	0	0	0	0	7	6
PVP01_0104200	PVP01_0104200	PVP01_0104200.1	protein_coding	0	7	11	14	3	0	0	11	0	0	0	0	0	0	0	0	7	11
PVP01_0104300	PVP01_0104300	PVP01_0104300.1	protein_coding	0	11	26	28	14	0	0	26	0	0	0	0	0	0	0	0	11	14
PVP01_0104400	PVP01_0104400	PVP01_0104400.1	protein_coding	0	4	8	27	20	0	0	8	0	0	0	0	0	0	0	0	4	7
PVP01_0104500	PVP01_0104500	PVP01_0104500.1	protein_coding	0	6	3	22	10	0	0	3	0	0	0	0	0	0	0	0	6	12
PVP01_0104600	PVP01_0104600	PVP01_0104600.1	protein_coding	0	2	3	23	11	0	0	3	0	0	0	0	0	0	0	0	2	12
PVP01_0104700	PVP01_0104700	PVP01_0104700.1	protein_coding	0	3	5	23	11	0	0	5	0	0	0	0	0	0	0	0	3	12
PVP01_0104800	PVP01_0104800	PVP01_0104800.1	protein_coding	0	8	14	31	13	0	2	14	0	0	0	0	0	0	0	0	8	16
PVP01_0104900	PVP01_0104900	PVP01_0104900.1	protein_coding	0	1	5	27	13	0	0	5	0	0	0	0	0	0	0	0	1	14
PVP01_0105000	PVP01_0105000	PVP01_0105000.1	protein_coding	0	3	5	23	8	0	0	5	0	0	0	0	0	0	0	0	3	15
PVP01_0105100	PVP01_0105100	PVP01_0105100.1	protein_coding	0	0	0	28	12	0	0	0	0	0	0	0	0	0	0	0	0	16
PVP01_0105200	PVP01_0105200	PVP01_0105200.1	protein_coding	0	6	5	23	11	0	1	5	0	0	0	0	0	0	0	0	6	11
PVP01_0105300	PVP01_0105300	PVP01_0105300.1	protein_coding	0	3	4	21	6	0	0	4	0	0	0	0	0	0	0	0	3	15
PVP01_0105400	PVP01_0105400	PVP01_0105400.1	protein_coding	0	1	4	19	8	0	0	4	0	0	0	0	0	0	0	0	1	11
PVP01_0105500	PVP01_0105500	PVP01_0105500.1	protein_coding	0	2	3	12	4	0	0	3	0	0	0	0	0	0	0	0	2	8
PVP01_0105600	PVP01_0105600	PVP01_0105600.1	protein_coding	0	1	0	19	8	0	0	0	0	0	0	0	0	0	0	0	1	11
PVP01_0105700	PVP01_0105700	PVP01_0105700.1	protein_coding	0	12	14	23	5	0	0	14	0	0	0	0	0	0	0	0	12	18
PVP01_0105800	PVP01_0105800	PVP01_0105800.1	protein_coding	0	3	3	33	19	0	0	3	0	0	0	0	0	0	0	0	3	14
PVP01_0105900	PVP01_0105900	PVP01_0105900.1	protein_coding	0	0	0	26	10	0	6	0	0	0	0	0	0	0	0	0	0	10
PVP01_0106000	PVP01_0106000	PVP01_0106000.1	protein_coding	0	1	0	27	12	0	4	0	0	0	0	0	0	0	0	0	1	11
PVP01_0106100	PVP01_0106100	PVP01_0106100.1	protein_coding	0	0	1	25	13	0	3	1	0	0	0	0	0	0	0	0	0	9
PVP01_0106200	PVP01_0106200	PVP01_0106200.1	protein_coding	0	7	0	25	15	0	0	0	0	0	0	0	0	0	0	0	7	10
PVP01_0106300	PVP01_0106300	PVP01_0106300.1	protein_coding	0	4	5	27	7	0	7	5	0	0	0	0	0	0	0	0	4	13
PVP01_0106400	PVP01_0106400	PVP01_0106400.1	protein_coding	0	0	0	23	12	0	2	0	0	0	0	0	0	0	0	0	0	9
PVP01_0106500	PVP01_0106500	PVP01_0106500.1	protein_coding	0	1	0	27	12	0	1	0	0	0	0	0	0	0	0	0	1	14
PVP01_0106600	PVP01_0106600	PVP01_0106600.1	protein_coding	0	0	0	30	13	0	0	0	0	0	0	0	0	0	0	0	0	17
PVP01_0106700	PVP01_0106700	PVP01_0106700.1	protein_coding	0	17	24	19	13	0	0	24	0	0	0	0	0	0	0	0	17	6
PVP01_0106800	PVP01_0106800	PVP01_0106800.1	protein_coding	0	0	1	29	21	0	0	1	0	0	0	0	0	0	0	0	0	8
PVP01_0106900	PVP01_0106900	PVP01_0106900.1	protein_coding	0	4	8	26	15	0	0	8	0	0	0	0	0	0	0	0	4	11
PVP01_0107000	PVP01_0107000	PVP01_0107000.1	protein_coding	0	0	0	38	19	0	0	0	0	0	0	0	0	0	0	0	0	19
PVP01_0107100	PVP01_0107100	PVP01_0107100.1	protein_coding	0	0	0	40	21	0	0	0	0	0	0	0	0	0	0	0	0	19
PVP01_0107200	PVP01_0107200	PVP01_0107200.1	protein_coding	0	0	0	37	18	0	0	0	0	0	0	0	0	0	0	0	0	19
PVP01_0107300	PVP01_0107300	PVP01_0107300.1	protein_coding	0	0	0	37	13	0	0	0	0	0	0	0	0	0	0	0	0	24
PVP01_0107400	PVP01_0107400	PVP01_0107400.1	protein_coding	0	6	14	39	15	0	0	14	0	0	0	0	0	0	0	0	6	24
PVP01_0107500	PVP01_0107500	PVP01_0107500.1	protein_coding	0	3	3	37	13	0	3	3	0	0	0	0	0	0	0	0	3	21
PVP01_0107600	PVP01_0107600	PVP01_0107600.1	protein_coding	0	5	2	22	8	0	0	2	0	0	0	0	0	0	0	0	5	14
PVP01_0107700	PVP01_0107700	PVP01_0107700.1	protein_coding	0	3	11	32	18	0	0	11	0	0	0	0	0	0	0	0	3	14
PVP01_0107800	PVP01_0107800	PVP01_0107800.1	protein_coding	0	3	2	41	23	0	0	2	0	0	0	0	0	0	0	0	3	18
PVP01_0107900	PVP01_0107900	PVP01_0107900.1	protein_coding	0	9	18	31	13	0	0	18	0	0	0	0	0	0	0	0	9	18
PVP01_0108000	PVP01_0108000	PVP01_0108000.1	protein_coding	0	3	2	57	22	0	2	2	0	0	0	1	0	0	0	0	2	34
PVP01_0108100	PVP01_0108100	PVP01_0108100.1	protein_coding	0	0	1	29	18	0	0	1	0	0	0	0	0	0	0	0	0	11
PVP01_0108200	PVP01_0108200	PVP01_0108200.1	protein_coding	0	3	2	28	8	0	0	2	0	0	0	0	0	0	0	0	3	20
PVP01_0108300	PVP01_0108300	PVP01_0108300.1	protein_coding	0	1	0	23	7	0	0	0	0	0	0	0	0	0	0	0	1	16
PVP01_0108400	PVP01_0108400	PVP01_0108400.1	protein_coding	0	0	0	15	8	0	0	0	0	0	0	0	0	0	0	0	0	7
PVP01_0108500	PVP01_0108500	PVP01_0108500.1	protein_coding	0	1	4	15	4	0	0	4	0	0	0	0	0	0	0	0	1	11
PVP01_0108600	PVP01_0108600	PVP01_0108600.1	protein_coding	0	1	1	28	18	0	3	1	0	0	0	0	0	0	0	0	1	7
PVP01_0108700	PVP01_0108700	PVP01_0108700.1	protein_coding	0	3	2	29	10	0	8	2	0	0	0	0	0	0	0	0	3	11
PVP01_0108800	PVP01_0108800	PVP01_0108800.1	protein_coding	0	1	4	26	18	0	0	4	0	0	0	0	0	0	0	0	1	8
PVP01_0108900	PVP01_0108900	PVP01_0108900.1	protein_coding	0	0	0	22	11	0	1	0	0	0	0	0	0	0	0	0	0	10
PVP01_0109000	PVP01_0109000	PVP01_0109000.1	protein_coding	0	0	0	30	10	0	0	0	0	0	0	0	0	0	0	0	0	20
PVP01_0109100	PVP01_0109100	PVP01_0109100.1	protein_coding	0	4	2	30	14	0	0	2	0	0	0	0	0	0	0	0	4	16
PVP01_0109200	PVP01_0109200	PVP01_0109200.1	protein_coding	0	0	1	41	18	0	0	1	0	0	0	0	0	0	0	0	0	23
PVP01_0109300	PVP01_0109300	PVP01_0109300.1	protein_coding	0	4	0	46	20	0	13	0	0	0	0	0	0	0	0	0	4	13
PVP01_0109400	PVP01_0109400	PVP01_0109400.1	protein_coding	0	3	4	40	13	0	0	4	0	0	0	0	0	0	0	0	3	27
PVP01_0109500	PVP01_0109500	PVP01_0109500.1	protein_coding	0	0	1	30	15	0	0	1	0	0	0	0	0	0	0	0	0	15
PVP01_0109600	PVP01_0109600	PVP01_0109600.1	protein_coding	0	9	8	33	12	0	0	8	0	0	0	0	0	0	0	0	9	21
PVP01_0109700	PVP01_0109700	PVP01_0109700.1	protein_coding	0	3	7	32	20	0	0	7	0	0	0	0	0	0	0	0	3	12
PVP01_0109800	PVP01_0109800	PVP01_0109800.1	protein_coding	0	0	0	28	9	0	1	0	0	0	0	0	0	0	0	0	0	18
PVP01_0109900	PVP01_0109900	PVP01_0109900.1	protein_coding	0	2	5	45	14	0	0	5	0	0	0	0	0	0	0	0	2	31
PVP01_0110000	PVP01_0110000	PVP01_0110000.1	protein_coding	0	5	13	40	15	0	0	13	0	0	0	0	0	0	0	0	5	25
PVP01_0110100	PVP01_0110100	PVP01_0110100.1	protein_coding	0	1	1	63	36	0	0	1	0	0	0	0	0	0	0	0	1	27
PVP01_0110200	PVP01_0110200	PVP01_0110200.1	protein_coding	0	0	0	60	36	0	0	0	0	0	0	0	0	0	0	0	0	24
PVP01_0110300	PVP01_0110300	PVP01_0110300.1	protein_coding	0	13	28	61	23	0	6	28	0	0	0	0	0	0	0	0	13	32
PVP01_0110400	PVP01_0110400	PVP01_0110400.1	protein_coding	0	9	15	44	30	0	0	15	0	0	0	0	0	0	0	0	9	14
PVP01_0110500	PVP01_0110500	PVP01_0110500.1	protein_coding	0	2	1	25	15	0	0	1	0	0	0	0	0	0	0	0	2	10
PVP01_0110600	PVP01_0110600	PVP01_0110600.1	protein_coding	0	6	11	21	7	0	0	11	0	0	0	0	0	0	0	0	6	14
PVP01_0110700	PVP01_0110700	PVP01_0110700.1	protein_coding	0	0	0	31	18	0	0	0	0	0	0	0	0	0	0	0	0	13
PVP01_0110800	PVP01_0110800	PVP01_0110800.1	protein_coding	0	0	0	26	10	0	0	0	0	0	0	0	0	0	0	0	0	16
PVP01_0110900	PVP01_0110900	PVP01_0110900.1	protein_coding	0	0	0	26	10	0	0	0	0	0	0	0	0	0	0	0	0	16
PVP01_0111000	PVP01_0111000	PVP01_0111000.1	protein_coding	0	0	0	25	12	0	1	0	0	0	0	0	0	0	0	0	0	12
PVP01_0111100	PVP01_0111100	PVP01_0111100.1	protein_coding	0	2	1	21	14	0	0	1	0	0	0	0	0	0	0	0	2	7
PVP01_0111200	PVP01_0111200	PVP01_0111200.1	protein_coding	0	0	2	17	10	0	0	2	0	0	0	0	0	0	0	0	0	7
PVP01_0111300	PVP01_0111300	PVP01_0111300.1	protein_coding	0	0	1	21	7	0	0	1	0	0	0	0	0	0	0	0	0	14
PVP01_0111400	PVP01_0111400	PVP01_0111400.1	protein_coding	0	3	1	35	10	0	0	1	0	0	0	0	0	0	0	0	3	25
PVP01_0111500	PVP01_0111500	PVP01_0111500.1	protein_coding	0	0	5	32	8	0	0	5	0	0	0	0	0	0	0	0	0	24
PVP01_0111600	PVP01_0111600	PVP01_0111600.1	protein_coding	0	1	6	42	14	0	0	6	0	0	0	0	0	0	0	0	1	28
PVP01_0111700	PVP01_0111700	PVP01_0111700.1	protein_coding	0	2	0	40	23	0	0	0	0	0	0	0	0	0	0	0	2	17
PVP01_0111800	PVP01_0111800	PVP01_0111800.1	protein_coding	0	4	1	36	17	0	0	1	0	0	0	0	0	0	0	0	4	19
PVP01_0111900	PVP01_0111900	PVP01_0111900.1	protein_coding	0	2	1	42	22	0	0	1	0	0	0	0	0	0	0	0	2	20
PVP01_0111950	PVP01_0111950	PVP01_0111950.1	protein_coding	0	0	1	43	26	0	2	1	0	0	0	0	0	0	0	0	0	15
PVP01_0112000	PVP01_0112000	PVP01_0112000.1	protein_coding	0	0	3	41	15	0	0	3	0	0	0	0	0	0	0	0	0	26
PVP01_0112100	PVP01_0112100	PVP01_0112100.1	protein_coding	0	0	2	41	23	0	0	2	0	0	0	0	0	0	0	0	0	18
PVP01_0112200	PVP01_0112200	PVP01_0112200.1	protein_coding	0	0	1	40	15	0	0	1	0	0	0	0	0	0	0	0	0	25
PVP01_0112300	PVP01_0112300	PVP01_0112300.1	protein_coding	0	6	8	39	18	0	2	8	0	0	0	0	0	0	0	0	6	19
PVP01_0112400	PVP01_0112400	PVP01_0112400.1	protein_coding	0	8	8	41	12	0	0	8	0	0	0	0	0	0	0	0	8	29
PVP01_0112500	PVP01_0112500	PVP01_0112500.1	protein_coding	0	3	0	56	22	0	2	0	0	0	0	0	0	0	0	0	3	32
PVP01_0112600	PVP01_0112600	PVP01_0112600.1	protein_coding	0	8	9	41	22	0	2	9	0	0	0	0	0	0	0	0	8	17
PVP01_0112700	PVP01_0112700	PVP01_0112700.1	protein_coding	0	3	6	59	25	0	0	6	0	0	0	0	0	0	0	0	3	34
PVP01_0112800	PVP01_0112800	PVP01_0112800.1	protein_coding	0	8	14	39	13	0	5	14	0	0	0	0	0	0	0	0	8	21
PVP01_0112900	PVP01_0112900	PVP01_0112900.1	protein_coding	0	1	0	43	29	0	1	0	0	0	0	0	0	0	0	0	1	13
PVP01_0113000	PVP01_0113000	PVP01_0113000.1	protein_coding	0	0	2	37	21	0	1	2	0	0	0	0	0	0	0	0	0	15
PVP01_0113100	PVP01_0113100	PVP01_0113100.1	protein_coding	0	0	0	38	12	0	8	0	0	0	0	0	0	0	0	0	0	18
PVP01_0113200	PVP01_0113200	PVP01_0113200.1	protein_coding	0	3	1	35	18	0	4	1	0	0	0	1	0	0	0	0	2	14
PVP01_0113300	PVP01_0113300	PVP01_0113300.1	protein_coding	1	2	5	46	27	0	0	5	0	0	0	0	0	1	0	0	2	19
PVP01_0113400	PVP01_0113400	PVP01_0113400.1	protein_coding	0	1	0	38	10	0	2	0	0	0	0	1	0	0	0	0	0	27
PVP01_0113500	PVP01_0113500	PVP01_0113500.1	protein_coding	0	2	19	20	8	0	0	19	0	0	0	0	0	0	0	0	2	12
PVP01_0113600	PVP01_0113600	PVP01_0113600.1	protein_coding	0	5	1	47	19	0	0	1	0	0	0	0	0	0	0	0	5	28
PVP01_0113700	PVP01_0113700	PVP01_0113700.1	protein_coding	0	2	5	26	11	0	0	5	0	0	0	0	0	0	0	0	2	15
PVP01_0113800	PVP01_0113800	PVP01_0113800.1	protein_coding	0	8	6	30	20	0	1	6	0	0	0	1	0	0	0	0	7	10
PVP01_0113900	PVP01_0113900	PVP01_0113900.1	protein_coding	0	1	0	27	15	0	4	0	0	0	0	0	0	0	0	0	1	8
PVP01_0114000	PVP01_0114000	PVP01_0114000.1	protein_coding	0	5	2	34	23	0	0	2	0	0	0	0	0	0	0	0	5	11
PVP01_0114100	PVP01_0114100	PVP01_0114100.1	protein_coding	0	0	0	46	16	0	0	0	0	0	0	0	0	0	0	0	0	30
PVP01_0114200	PVP01_0114200	PVP01_0114200.1	protein_coding	0	14	14	27	13	0	1	14	0	0	0	0	0	0	0	0	14	13
PVP01_0114300	PVP01_0114300	PVP01_0114300.1	protein_coding	0	4	3	43	27	0	4	3	0	0	0	1	0	0	0	0	4	12
PVP01_0114400	PVP01_0114400	PVP01_0114400.1	protein_coding	0	1	2	20	13	0	0	2	0	0	0	0	0	0	0	0	1	7
PVP01_0114500	PVP01_0114500	PVP01_0114500.1	protein_coding	0	3	2	20	6	0	0	2	0	0	0	0	0	0	0	0	3	14
PVP01_0114600	PVP01_0114600	PVP01_0114600.1	protein_coding	0	1	0	20	10	0	1	0	0	0	0	0	0	0	0	0	1	9
PVP01_0114700	PVP01_0114700	PVP01_0114700.1	protein_coding	0	0	1	16	11	0	0	1	0	0	0	0	0	0	0	0	0	5
PVP01_0114800	PVP01_0114800	PVP01_0114800.1	protein_coding	0	6	5	37	19	0	7	5	0	0	0	0	0	0	0	0	6	11
PVP01_0114900	PVP01_0114900	PVP01_0114900.1	protein_coding	0	2	2	35	21	0	0	2	0	0	0	0	0	0	0	0	2	14
PVP01_0115000	PVP01_0115000	PVP01_0115000.1	protein_coding	0	1	5	25	11	0	0	5	0	0	0	0	0	0	0	0	1	14
PVP01_0115100	PVP01_0115100	PVP01_0115100.1	protein_coding	0	0	0	22	11	0	1	0	0	0	0	0	0	0	0	0	0	10
PVP01_0115200	PVP01_0115200	PVP01_0115200.1	protein_coding	0	2	8	14	8	0	0	8	0	0	0	0	0	0	0	0	2	6
PVP01_0115300	PVP01_0115300	PVP01_0115300.1	protein_coding	0	0	0	25	8	0	0	0	0	0	0	0	0	0	0	0	0	17
PVP01_0115400	PVP01_0115400	PVP01_0115400.1	protein_coding	0	1	8	29	9	0	0	8	0	0	0	0	0	0	0	0	1	20
PVP01_0115500	PVP01_0115500	PVP01_0115500.1	protein_coding	0	1	0	39	11	0	7	0	0	0	0	1	0	0	0	0	1	21
PVP01_0115600	PVP01_0115600	PVP01_0115600.1	protein_coding	0	1	1	33	13	0	0	1	0	0	0	0	0	0	0	0	1	20
PVP01_0115700	PVP01_0115700	PVP01_0115700.1	protein_coding	0	1	0	25	14	0	0	0	0	0	0	0	0	0	0	0	1	11
PVP01_0115800	PVP01_0115800	PVP01_0115800.1	protein_coding	0	3	9	19	7	0	0	9	0	0	0	0	0	0	0	0	3	12
PVP01_0115900	PVP01_0115900	PVP01_0115900.1	protein_coding	0	1	2	22	14	0	0	2	0	0	0	0	0	0	0	0	1	8
PVP01_0116000	PVP01_0116000	PVP01_0116000.1	protein_coding	0	14	25	26	9	0	1	25	0	0	0	0	0	0	0	0	14	16
PVP01_0116100	PVP01_0116100	PVP01_0116100.1	protein_coding	0	0	4	59	17	0	0	4	0	0	0	0	0	0	0	0	0	42
PVP01_0116200	PVP01_0116200	PVP01_0116200.1	protein_coding	0	4	10	43	15	0	0	10	0	0	0	0	0	0	0	0	4	28
PVP01_0116300	PVP01_0116300	PVP01_0116300.1	protein_coding	0	0	6	62	41	0	2	6	0	0	0	0	0	0	0	0	0	19
PVP01_0116400	PVP01_0116400	PVP01_0116400.1	protein_coding	0	0	0	34	20	0	0	0	0	0	0	0	0	0	0	0	0	14
PVP01_0116500	PVP01_0116500	PVP01_0116500.1	protein_coding	0	2	0	34	19	0	0	0	0	0	0	0	0	0	0	0	2	15
PVP01_0116600	PVP01_0116600	PVP01_0116600.1	protein_coding	0	3	8	54	21	0	23	8	0	0	0	0	0	0	0	0	3	10
PVP01_0116700	PVP01_0116700	PVP01_0116700.1	protein_coding	0	2	4	34	19	0	0	4	0	0	0	0	0	0	0	0	2	15
PVP01_0116800	PVP01_0116800	PVP01_0116800.1	protein_coding	0	9	3	25	10	0	0	3	0	0	0	0	0	0	0	0	9	15
PVP01_0116900	PVP01_0116900	PVP01_0116900.1	protein_coding	0	0	0	42	20	0	4	0	0	0	0	0	0	0	0	0	0	18
PVP01_0117000	PVP01_0117000	PVP01_0117000.1	protein_coding	0	5	5	18	8	0	0	5	0	0	0	0	0	0	0	0	5	10
PVP01_0117100	PVP01_0117100	PVP01_0117100.1	protein_coding	0	1	3	26	7	0	0	3	0	0	0	0	0	0	0	0	1	19
PVP01_0117200	PVP01_0117200	PVP01_0117200.1	protein_coding	0	1	0	18	9	0	0	0	0	0	0	0	0	0	0	0	1	9
PVP01_0117300	PVP01_0117300	PVP01_0117300.1	protein_coding	0	1	0	13	6	0	1	0	0	0	0	0	0	0	0	0	1	6
PVP01_0117400	PVP01_0117400	PVP01_0117400.1	protein_coding	0	1	0	18	8	0	1	0	0	0	0	0	0	0	0	0	1	9
PVP01_0117500	PVP01_0117500	PVP01_0117500.1	protein_coding	0	0	1	44	8	0	1	1	0	0	0	0	0	0	0	0	0	35
PVP01_0117600	PVP01_0117600	PVP01_0117600.1	protein_coding	0	11	21	24	7	0	2	21	0	0	0	0	0	0	0	0	11	15
PVP01_0117700	PVP01_0117700	PVP01_0117700.1	protein_coding	0	3	7	36	16	0	0	7	0	0	0	0	0	0	0	0	3	20
PVP01_0117800	PVP01_0117800	PVP01_0117800.1	protein_coding	0	5	6	28	15	0	1	6	0	0	0	0	0	0	0	0	5	12
PVP01_0117900	PVP01_0117900	PVP01_0117900.1	protein_coding	0	5	4	36	20	0	0	4	0	0	0	0	0	0	0	0	5	16
PVP01_0118000	PVP01_0118000	PVP01_0118000.1	protein_coding	0	1	0	33	11	0	0	0	0	0	0	0	0	0	0	0	1	22
PVP01_0118100	PVP01_0118100	PVP01_0118100.1	protein_coding	0	7	16	43	21	0	1	16	0	0	0	0	0	0	0	0	7	21
PVP01_0118200	PVP01_0118200	PVP01_0118200.1	protein_coding	0	5	10	32	14	0	0	10	0	0	0	0	0	0	0	0	5	18
PVP01_0118300	PVP01_0118300	PVP01_0118300.1	protein_coding	0	12	31	55	26	0	0	31	0	0	0	0	0	0	0	0	12	29
PVP01_0118400	PVP01_0118400	PVP01_0118400.1	protein_coding	0	2	5	44	20	0	0	5	0	0	0	0	0	0	0	0	2	24
PVP01_0118500	PVP01_0118500	PVP01_0118500.1	protein_coding	0	9	8	24	14	0	0	8	0	0	0	0	0	0	0	0	9	10
PVP01_0118600	PVP01_0118600	PVP01_0118600.1	protein_coding	0	0	0	21	9	0	0	0	0	0	0	0	0	0	0	0	0	12
PVP01_0118700	PVP01_0118700	PVP01_0118700.1	protein_coding	0	1	1	20	10	0	0	1	0	0	0	0	0	0	0	0	1	10
PVP01_0118800	PVP01_0118800	PVP01_0118800.1	protein_coding	0	2	1	30	20	0	1	1	0	0	0	0	0	0	0	0	2	9
PVP01_0118900	PVP01_0118900	PVP01_0118900.1	protein_coding	0	1	3	25	15	0	0	3	0	0	0	0	0	0	0	0	1	10
PVP01_0119000	PVP01_0119000	PVP01_0119000.1	rRNA	0	0	0	32	12	0	0	0	0	0	0	0	0	0	0	0	0	20
PVP01_0119100	PVP01_0119100	PVP01_0119100.1	rRNA	0	0	0	72	34	0	0	0	21	0	0	0	0	0	0	0	0	17
PVP01_0119200	PVP01_0119200	PVP01_0119200.1	protein_coding	0	1	21	42	18	0	0	21	0	0	0	0	0	0	0	0	1	24
PVP01_0119300	PVP01_0119300	PVP01_0119300.1	protein_coding	0	0	2	46	29	0	0	2	0	0	0	0	0	0	0	0	0	17
PVP01_0119400	PVP01_0119400	PVP01_0119400.1	protein_coding	0	2	3	31	15	0	0	3	0	0	0	0	0	0	0	0	2	16
PVP01_0119500	PVP01_0119500	PVP01_0119500.1	protein_coding	0	0	6	40	27	0	0	6	0	0	0	0	0	0	0	0	0	13
PVP01_0119600	PVP01_0119600	PVP01_0119600.1	protein_coding	0	1	7	43	18	0	2	7	0	0	0	1	0	0	0	0	0	24
PVP01_0119700	PVP01_0119700	PVP01_0119700.1	protein_coding	0	1	0	164	30	0	0	0	0	0	0	0	0	0	0	0	1	134
PVP01_0119800	PVP01_0119800	PVP01_0119800.1	protein_coding	0	14	48	163	64	0	13	48	0	0	0	0	0	0	0	0	14	86
PVP01_0119900	PVP01_0119900	PVP01_0119900.1	protein_coding	0	13	20	249	167	0	2	20	0	0	0	0	0	0	0	0	13	80
PVP01_0120000	PVP01_0120000	PVP01_0120000.1	protein_coding	0	0	0	244	191	0	0	0	0	0	0	0	0	0	0	0	0	53
PVP01_0120100	PVP01_0120100	PVP01_0120100.1	protein_coding	0	16	48	169	50	0	23	48	0	0	0	2	0	0	0	0	15	97
PVP01_0120200	PVP01_0120200	PVP01_0120200.1	protein_coding	0	4	10	123	72	0	0	10	0	0	0	0	0	0	0	0	4	51
PVP01_0120300	PVP01_0120300	PVP01_0120300.1	protein_coding	0	4	14	104	36	0	0	14	0	0	0	0	0	0	0	0	4	68
PVP01_0120400	PVP01_0120400	PVP01_0120400.1	protein_coding	0	2	28	147	63	0	0	28	0	0	0	0	0	0	0	0	2	84
PVP01_0120500	PVP01_0120500	PVP01_0120500.1	protein_coding	1	2	2	111	10	0	2	2	0	0	0	0	1	0	0	0	2	99
PVP01_0120600	PVP01_0120600	PVP01_0120600.1	protein_coding	0	1	7	22	8	0	0	7	0	0	0	0	0	0	0	0	1	14
PVP01_0120700	PVP01_0120700	PVP01_0120700.1	protein_coding	0	0	0	18	6	0	0	0	0	0	0	0	0	0	0	0	0	12
PVP01_0120800	PVP01_0120800	PVP01_0120800.1	protein_coding	0	0	0	38	7	0	0	0	0	0	0	0	0	0	0	0	0	31
PVP01_0120900	PVP01_0120900	PVP01_0120900.1	protein_coding	0	4	8	63	20	0	3	8	0	0	0	0	0	0	0	0	4	40
PVP01_0121000	PVP01_0121000	PVP01_0121000.1	protein_coding	0	1	5	52	47	0	3	5	0	0	0	0	0	0	0	0	1	2
PVP01_0121100	PVP01_0121100	PVP01_0121100.1	protein_coding	0	0	0	61	3	0	0	0	0	0	0	0	0	0	0	0	0	58
PVP01_0121200	PVP01_0121200	PVP01_0121200.1	protein_coding	3	8	20	43	24	0	5	20	0	0	0	0	0	1	2	0	8	14
PVP01_0121300	PVP01_0121300	PVP01_0121300.1	protein_coding	0	1	9	64	57	0	3	9	0	0	0	0	0	0	0	0	1	4
PVP01_0121400	PVP01_0121400	PVP01_0121400.1	protein_coding	0	1	1	38	8	0	0	1	0	0	0	0	0	0	0	0	1	30
PVP01_0121500	PVP01_0121500	PVP01_0121500.1	protein_coding	0	2	7	24	17	0	8	7	0	0	0	1	0	0	0	0	1	0
PVP01_0121600	PVP01_0121600	PVP01_0121600.1	protein_coding	0	0	0	37	3	0	0	0	0	0	0	0	0	0	0	0	0	34
PVP01_0121700	PVP01_0121700	PVP01_0121700.1	protein_coding	0	4	15	31	16	0	0	15	0	0	0	0	0	0	0	0	4	15
PVP01_0121800	PVP01_0121800	PVP01_0121800.1	protein_coding	0	2	6	53	7	0	6	6	0	0	0	0	0	0	0	0	2	40
PVP01_0121900	PVP01_0121900	PVP01_0121900.1	protein_coding	1	2	12	77	28	0	0	12	0	0	0	0	0	1	0	0	2	49
PVP01_0122000	PVP01_0122000	PVP01_0122000.1	protein_coding	0	5	10	58	30	0	0	10	0	0	0	0	0	0	0	0	5	28
PVP01_0122100	PVP01_0122100	PVP01_0122100.1	protein_coding	0	4	18	42	35	0	0	18	0	0	0	0	0	0	0	0	4	7
PVP01_0122200	PVP01_0122200	PVP01_0122200.1	protein_coding	0	2	3	34	4	0	0	3	0	0	0	0	0	0	0	0	2	30
PVP01_0200100	PVP01_0200100	PVP01_0200100.1	protein_coding	0	0	0	106	106	0	0	0	0	0	0	0	0	0	0	0	0	0
PVP01_0200200	PVP01_0200200	PVP01_0200200.1	protein_coding	0	24	41	218	9	0	12	41	0	0	0	4	0	0	0	0	21	200
PVP01_0200300	PVP01_0200300	PVP01_0200300.1	protein_coding	0	15	45	323	157	1	13	45	0	0	0	0	0	0	0	0	14	153
PVP01_0200400	PVP01_0200400	PVP01_0200400.1	protein_coding	0	4	5	222	73	0	4	5	0	0	0	1	0	0	0	0	3	146
PVP01_0200500	PVP01_0200500	PVP01_0200500.1	protein_coding	0	5	11	162	81	0	1	11	0	0	0	0	0	0	0	0	5	80
PVP01_0200600	PVP01_0200600	PVP01_0200600.1	protein_coding	0	2	3	135	35	0	1	3	0	0	0	0	0	0	0	0	2	99
PVP01_0200700	PVP01_0200700	PVP01_0200700.1	protein_coding	0	2	4	98	63	0	2	4	0	0	0	0	0	0	0	0	2	33
PVP01_0200800	PVP01_0200800	PVP01_0200800.1	protein_coding	0	9	13	152	120	0	6	13	0	0	0	1	0	0	0	0	8	27
PVP01_0200900	PVP01_0200900	PVP01_0200900.1	protein_coding	0	9	8	201	99	0	7	8	0	0	0	2	0	0	0	0	7	97
PVP01_0201000	PVP01_0201000	PVP01_0201000.1	protein_coding	0	3	7	213	107	0	2	7	0	0	0	0	0	0	0	0	3	104
PVP01_0201100	PVP01_0201100	PVP01_0201100.1	protein_coding	0	1	1	61	29	0	0	1	0	0	0	0	0	0	0	0	1	32
PVP01_0201200	PVP01_0201200	PVP01_0201200.1	protein_coding	0	4	2	77	48	0	2	2	0	0	0	0	0	0	0	0	4	27
PVP01_0201300	PVP01_0201300	PVP01_0201300.1	protein_coding	1	7	10	71	34	0	0	10	0	0	0	0	0	0	1	0	7	37
PVP01_0201400	PVP01_0201400	PVP01_0201400.1	protein_coding	0	3	19	108	33	0	2	19	0	0	0	0	0	0	0	0	3	73
PVP01_0201500	PVP01_0201500	PVP01_0201500.1	protein_coding	0	8	31	196	49	0	10	31	0	0	0	0	0	0	0	0	8	137
PVP01_0201600	PVP01_0201600	PVP01_0201600.1	protein_coding	0	31	40	179	100	0	14	40	0	0	0	3	0	0	0	0	28	68
PVP01_0201700	PVP01_0201700	PVP01_0201700.1	protein_coding	0	16	33	304	111	0	16	33	0	0	0	0	0	0	0	0	16	177
PVP01_0201800	PVP01_0201800	PVP01_0201800.1	protein_coding	1	30	26	291	187	0	8	26	0	0	0	0	0	1	0	0	30	96
PVP01_0201900	PVP01_0201900	PVP01_0201900.1	protein_coding	0	13	26	155	100	0	16	26	0	0	0	2	0	0	0	0	12	40
PVP01_0202000	PVP01_0202000	PVP01_0202000.1	protein_coding	0	3	10	86	34	0	0	10	0	0	0	0	0	0	0	0	3	52
PVP01_0202100	PVP01_0202100	PVP01_0202100.1	protein_coding	0	0	1	57	22	0	5	1	0	0	0	0	0	0	0	0	0	30
PVP01_0202200	PVP01_0202200	PVP01_0202200.1	protein_coding	0	1	2	52	21	0	0	2	0	0	0	0	0	0	0	0	1	31
PVP01_0202300	PVP01_0202300	PVP01_0202300.1	protein_coding	0	3	10	36	14	0	1	10	0	0	0	0	0	0	0	0	3	21
PVP01_0202400	PVP01_0202400	PVP01_0202400.1	protein_coding	0	0	3	34	22	0	0	3	0	0	0	0	0	0	0	0	0	12
PVP01_0202500	PVP01_0202500	PVP01_0202500.1	protein_coding	0	1	3	24	10	0	0	3	0	0	0	0	0	0	0	0	1	14
PVP01_0202600	PVP01_0202600	PVP01_0202600.1	protein_coding	0	6	9	29	15	0	0	9	0	0	0	0	0	0	0	0	6	14
PVP01_0202700	PVP01_0202700	PVP01_0202700.1	rRNA	0	0	0	129	20	0	0	0	14	0	0	0	0	0	0	0	0	95
PVP01_0202800	PVP01_0202800	PVP01_0202800.1	rRNA	0	0	0	117	15	0	0	0	0	0	0	0	0	0	0	0	0	102
PVP01_0202900	PVP01_0202900	PVP01_0202900.1	rRNA	0	0	0	123	20	0	0	0	56	0	0	0	0	0	0	0	0	47
PVP01_0203000	PVP01_0203000	PVP01_0203000.1	protein_coding	0	3	8	47	39	0	0	8	0	0	0	0	0	0	0	0	3	8
PVP01_0203100	PVP01_0203100	PVP01_0203100.1	protein_coding	0	0	0	16	7	0	0	0	0	0	0	0	0	0	0	0	0	9
PVP01_0203200	PVP01_0203200	PVP01_0203200.1	protein_coding	0	2	2	21	13	0	2	2	0	0	0	0	0	0	0	0	2	6
PVP01_0203300	PVP01_0203300	PVP01_0203300.1	protein_coding	0	0	0	25	15	0	0	0	0	0	0	0	0	0	0	0	0	10
PVP01_0203400	PVP01_0203400	PVP01_0203400.1	protein_coding	0	3	1	32	9	0	8	1	0	0	0	0	0	0	0	0	3	15
PVP01_0203500	PVP01_0203500	PVP01_0203500.1	protein_coding	0	0	0	25	8	0	0	0	0	0	0	0	0	0	0	0	0	17
PVP01_0203600	PVP01_0203600	PVP01_0203600.1	protein_coding	0	2	3	17	3	0	0	3	0	0	0	0	0	0	0	0	2	14
PVP01_0203700	PVP01_0203700	PVP01_0203700.1	protein_coding	0	1	1	24	9	0	0	1	0	0	0	0	0	0	0	0	1	15
PVP01_0203800	PVP01_0203800	PVP01_0203800.1	protein_coding	0	3	2	20	8	0	0	2	0	0	0	0	0	0	0	0	3	12
PVP01_0203900	PVP01_0203900	PVP01_0203900.1	protein_coding	0	3	3	26	15	0	0	3	0	0	0	0	0	0	0	0	3	11
PVP01_0204000	PVP01_0204000	PVP01_0204000.1	protein_coding	0	0	0	36	27	0	0	0	0	0	0	0	0	0	0	0	0	9
PVP01_0204100	PVP01_0204100	PVP01_0204100.1	protein_coding	0	9	15	26	13	0	2	15	0	0	0	0	0	0	0	0	9	11
PVP01_0204200	PVP01_0204200	PVP01_0204200.1	protein_coding	0	0	2	40	17	0	0	2	0	0	0	0	0	0	0	0	0	23
PVP01_0204300	PVP01_0204300	PVP01_0204300.1	protein_coding	0	1	0	29	16	0	1	0	0	0	0	0	0	0	0	0	1	12
PVP01_0204400	PVP01_0204400	PVP01_0204400.1	protein_coding	0	0	0	45	33	0	0	0	0	0	0	0	0	0	0	0	0	12
PVP01_0204500	PVP01_0204500	PVP01_0204500.1	protein_coding	0	15	15	36	7	0	9	15	0	0	0	0	0	0	0	0	15	20
PVP01_0204600	PVP01_0204600	PVP01_0204600.1	protein_coding	0	9	7	55	34	0	3	7	0	0	0	0	0	0	0	0	9	18
PVP01_0204700	PVP01_0204700	PVP01_0204700.1	protein_coding	0	4	0	38	19	0	1	0	0	0	0	0	0	0	0	0	4	18
PVP01_0204800	PVP01_0204800	PVP01_0204800.1	protein_coding	0	2	1	34	19	0	0	1	0	0	0	0	0	0	0	0	2	15
PVP01_0204900	PVP01_0204900	PVP01_0204900.1	protein_coding	0	4	3	42	20	0	0	3	0	0	0	0	0	0	0	0	4	22
PVP01_0205000	PVP01_0205000	PVP01_0205000.1	protein_coding	0	3	2	35	19	0	0	2	0	0	0	0	0	0	0	0	3	16
PVP01_0205100	PVP01_0205100	PVP01_0205100.1	protein_coding	0	0	0	37	20	0	2	0	0	0	0	0	0	0	0	0	0	15
PVP01_0205200	PVP01_0205200	PVP01_0205200.1	protein_coding	0	0	2	35	16	0	11	2	0	0	0	0	0	0	0	0	0	8
PVP01_0205300	PVP01_0205300	PVP01_0205300.1	protein_coding	0	0	3	45	15	0	0	3	0	0	0	0	0	0	0	0	0	30
PVP01_0205400	PVP01_0205400	PVP01_0205400.1	protein_coding	0	1	0	46	38	0	0	0	0	0	0	0	0	0	0	0	1	8
PVP01_0205500	PVP01_0205500	PVP01_0205500.1	protein_coding	0	1	0	47	38	0	1	0	0	0	0	1	0	0	0	0	0	9
PVP01_0205600	PVP01_0205600	PVP01_0205600.1	protein_coding	0	2	1	46	28	0	5	1	0	0	0	0	0	0	0	0	2	13
PVP01_0205700	PVP01_0205700	PVP01_0205700.1	protein_coding	0	1	1	49	15	0	2	1	0	0	0	1	0	0	0	0	0	33
PVP01_0205800	PVP01_0205800	PVP01_0205800.1	protein_coding	0	0	0	50	10	0	3	0	0	0	0	0	0	0	0	0	0	37
PVP01_0205900	PVP01_0205900	PVP01_0205900.1	protein_coding	0	2	0	33	14	0	0	0	0	0	0	0	0	0	0	0	2	19
PVP01_0206000	PVP01_0206000	PVP01_0206000.1	protein_coding	0	1	3	38	15	0	1	3	0	0	0	0	0	0	0	0	1	22
PVP01_0206100	PVP01_0206100	PVP01_0206100.1	protein_coding	0	0	3	29	14	0	0	3	0	0	0	0	0	0	0	0	0	15
PVP01_0206200	PVP01_0206200	PVP01_0206200.1	protein_coding	0	3	0	38	24	0	2	0	0	0	0	0	0	0	0	0	3	12
PVP01_0206300	PVP01_0206300	PVP01_0206300.1	protein_coding	0	3	7	31	21	0	0	7	0	0	0	0	0	0	0	0	3	10
PVP01_0206400	PVP01_0206400	PVP01_0206400.1	protein_coding	0	2	1	32	15	0	6	1	0	0	0	0	0	0	0	0	2	11
PVP01_0206500	PVP01_0206500	PVP01_0206500.1	protein_coding	0	0	1	37	17	0	0	1	0	0	0	0	0	0	0	0	0	20
PVP01_0206600	PVP01_0206600	PVP01_0206600.1	protein_coding	0	0	3	52	25	0	6	3	0	0	0	0	0	0	0	0	0	21
PVP01_0206700	PVP01_0206700	PVP01_0206700.1	protein_coding	0	18	8	46	20	0	0	8	0	0	0	0	0	0	0	0	18	26
PVP01_0206800	PVP01_0206800	PVP01_0206800.1	protein_coding	0	6	8	34	19	0	0	8	0	0	0	0	0	0	0	0	6	15
PVP01_0206900	PVP01_0206900	PVP01_0206900.1	protein_coding	0	1	0	38	14	0	1	0	0	0	0	0	0	0	0	0	1	23
PVP01_0207000	PVP01_0207000	PVP01_0207000.1	protein_coding	0	1	2	35	17	0	0	2	0	0	0	0	0	0	0	0	1	18
PVP01_0207100	PVP01_0207100	PVP01_0207100.1	protein_coding	0	0	5	38	16	0	0	5	0	0	0	0	0	0	0	0	0	22
PVP01_0207200	PVP01_0207200	PVP01_0207200.1	protein_coding	0	5	7	23	10	0	0	7	0	0	0	0	0	0	0	0	5	13
PVP01_0207300	PVP01_0207300	PVP01_0207300.1	protein_coding	0	14	15	49	20	0	3	15	0	0	0	0	0	0	0	0	14	26
PVP01_0207400	PVP01_0207400	PVP01_0207400.1	protein_coding	0	12	3	38	15	0	1	3	0	0	0	0	0	0	0	0	12	22
PVP01_0207500	PVP01_0207500	PVP01_0207500.1	protein_coding	0	2	0	37	19	0	0	0	0	0	0	0	0	0	0	0	2	18
PVP01_0207600	PVP01_0207600	PVP01_0207600.1	protein_coding	0	0	0	36	10	0	6	0	0	0	0	0	0	0	0	0	0	20
PVP01_0207700	PVP01_0207700	PVP01_0207700.1	protein_coding	1	1	6	28	14	0	0	6	0	0	0	0	0	1	0	0	1	14
PVP01_0207800	PVP01_0207800	PVP01_0207800.1	protein_coding	0	0	0	36	18	0	3	0	0	0	0	0	0	0	0	0	0	15
PVP01_0207900	PVP01_0207900	PVP01_0207900.1	protein_coding	0	0	2	38	21	0	0	2	0	0	0	0	0	0	0	0	0	17
PVP01_0208000	PVP01_0208000	PVP01_0208000.1	protein_coding	0	0	0	45	14	0	6	0	0	0	0	0	0	0	0	0	0	25
PVP01_0208100	PVP01_0208100	PVP01_0208100.1	protein_coding	0	7	11	31	18	0	0	11	0	0	0	0	0	0	0	0	7	13
PVP01_0208200	PVP01_0208200	PVP01_0208200.1	protein_coding	0	1	1	37	20	0	0	1	0	0	0	0	0	0	0	0	1	17
PVP01_0208300	PVP01_0208300	PVP01_0208300.1	protein_coding	0	2	8	43	22	0	0	8	0	0	0	0	0	0	0	0	2	21
PVP01_0208400	PVP01_0208400	PVP01_0208400.1	protein_coding	0	0	0	38	16	0	3	0	0	0	0	0	0	0	0	0	0	19
PVP01_0208500	PVP01_0208500	PVP01_0208500.1	protein_coding	0	5	2	45	14	0	9	2	0	0	0	0	0	0	0	0	5	22
PVP01_0208600	PVP01_0208600	PVP01_0208600.1	protein_coding	0	0	1	36	14	0	3	1	0	0	0	0	0	0	0	0	0	19
PVP01_0208700	PVP01_0208700	PVP01_0208700.1	protein_coding	0	1	0	36	11	0	0	0	0	0	0	0	0	0	0	0	1	25
PVP01_0208800	PVP01_0208800	PVP01_0208800.1	protein_coding	0	3	2	26	13	0	0	2	0	0	0	0	0	0	0	0	3	13
PVP01_0208900	PVP01_0208900	PVP01_0208900.1	protein_coding	0	1	3	19	8	0	0	3	0	0	0	0	0	0	0	0	1	11
PVP01_0209000	PVP01_0209000	PVP01_0209000.1	protein_coding	0	1	2	28	17	0	5	2	0	0	0	0	0	0	0	0	1	6
PVP01_0209100	PVP01_0209100	PVP01_0209100.1	protein_coding	0	9	21	28	11	0	0	21	0	0	0	0	0	0	0	0	9	17
PVP01_0209200	PVP01_0209200	PVP01_0209200.1	protein_coding	0	3	3	53	29	0	8	3	0	0	0	0	0	0	0	0	3	16
PVP01_0209300	PVP01_0209300	PVP01_0209300.1	protein_coding	0	0	0	46	30	0	0	0	0	0	0	0	0	0	0	0	0	16
PVP01_0209400	PVP01_0209400	PVP01_0209400.1	protein_coding	0	1	3	39	18	0	9	3	0	0	0	0	0	0	0	0	1	12
PVP01_0209500	PVP01_0209500	PVP01_0209500.1	protein_coding	0	0	3	35	9	0	0	3	0	0	0	1	0	0	0	0	0	26
PVP01_0209600	PVP01_0209600	PVP01_0209600.1	protein_coding	0	1	1	47	17	0	0	1	0	0	0	0	0	0	0	0	1	30
PVP01_0209700	PVP01_0209700	PVP01_0209700.1	protein_coding	0	0	0	37	17	0	0	0	0	0	0	0	0	0	0	0	0	20
PVP01_0209800	PVP01_0209800	PVP01_0209800.1	lincRNA	0	0	0	36	28	0	0	0	0	0	0	0	0	0	0	0	0	8
PVP01_0209900	PVP01_0209900	PVP01_0209900.1	protein_coding	0	1	5	29	16	0	0	5	0	0	0	0	0	0	0	0	1	13
PVP01_0210000	PVP01_0210000	PVP01_0210000.1	protein_coding	0	0	0	40	28	0	0	0	0	0	0	0	0	0	0	0	0	12
PVP01_0210100	PVP01_0210100	PVP01_0210100.1	protein_coding	0	3	6	24	17	0	0	6	0	0	0	0	0	0	0	0	3	7
PVP01_0210200	PVP01_0210200	PVP01_0210200.1	protein_coding	0	1	0	21	9	0	0	0	0	0	0	0	0	0	0	0	1	12
PVP01_0210300	PVP01_0210300	PVP01_0210300.1	protein_coding	0	2	1	21	11	0	0	1	0	0	0	0	0	0	0	0	2	10
PVP01_0210400	PVP01_0210400	PVP01_0210400.1	protein_coding	0	11	10	33	12	0	2	10	0	0	0	0	0	0	0	0	11	19
PVP01_0210500	PVP01_0210500	PVP01_0210500.1	protein_coding	0	3	7	33	23	0	0	7	0	0	0	0	0	0	0	0	3	10
PVP01_0210600	PVP01_0210600	PVP01_0210600.1	protein_coding	0	0	10	39	23	0	0	10	0	0	0	0	0	0	0	0	0	16
PVP01_0210700	PVP01_0210700	PVP01_0210700.1	protein_coding	0	1	1	35	15	0	1	1	0	0	0	0	0	0	0	0	1	19
PVP01_0210800	PVP01_0210800	PVP01_0210800.1	protein_coding	0	0	8	27	15	0	0	8	0	0	0	0	0	0	0	0	0	12
PVP01_0210900	PVP01_0210900	PVP01_0210900.1	protein_coding	0	2	0	40	19	0	7	0	0	0	0	1	0	0	0	0	1	15
PVP01_0211000	PVP01_0211000	PVP01_0211000.1	protein_coding	0	0	1	36	12	0	1	1	0	0	0	0	0	0	0	0	0	23
PVP01_0211100	PVP01_0211100	PVP01_0211100.1	protein_coding	0	4	15	30	10	0	2	15	0	0	0	0	0	0	0	0	4	18
PVP01_0211200	PVP01_0211200	PVP01_0211200.1	protein_coding	0	7	13	37	13	0	4	13	0	0	0	0	0	0	0	0	7	20
PVP01_0211300	PVP01_0211300	PVP01_0211300.1	protein_coding	0	2	8	39	13	0	0	8	0	0	0	0	0	0	0	0	2	26
PVP01_0211400	PVP01_0211400	PVP01_0211400.1	protein_coding	0	2	1	37	26	0	0	1	0	0	0	0	0	0	0	0	2	11
PVP01_0211500	PVP01_0211500	PVP01_0211500.1	protein_coding	0	1	3	35	17	0	6	3	0	0	0	0	0	0	0	0	1	12
PVP01_0211600	PVP01_0211600	PVP01_0211600.1	protein_coding	0	6	10	38	14	0	0	10	0	0	0	0	0	0	0	0	6	24
PVP01_0211700	PVP01_0211700	PVP01_0211700.1	protein_coding	0	1	1	37	19	0	0	1	0	0	0	0	0	0	0	0	1	18
PVP01_0211800	PVP01_0211800	PVP01_0211800.1	protein_coding	0	2	3	29	15	0	0	3	0	0	0	0	0	0	0	0	2	14
PVP01_0211900	PVP01_0211900	PVP01_0211900.1	protein_coding	0	1	3	31	14	0	0	3	0	0	0	0	0	0	0	0	1	17
PVP01_0212000	PVP01_0212000	PVP01_0212000.1	protein_coding	0	2	7	50	28	0	5	7	0	0	0	0	0	0	0	0	2	17
PVP01_0212100	PVP01_0212100	PVP01_0212100.1	protein_coding	1	25	31	42	16	0	2	31	0	0	0	0	0	1	0	0	25	24
PVP01_0212200	PVP01_0212200	PVP01_0212200.1	protein_coding	0	15	10	45	23	0	1	10	0	0	0	0	0	0	0	0	15	21
PVP01_0212300	PVP01_0212300	PVP01_0212300.1	protein_coding	0	2	5	30	9	0	0	5	0	0	0	0	0	0	0	0	2	21
PVP01_0212400	PVP01_0212400	PVP01_0212400.1	protein_coding	0	1	0	22	16	0	0	0	0	0	0	0	0	0	0	0	1	6
PVP01_0212500	PVP01_0212500	PVP01_0212500.1	protein_coding	0	0	1	20	12	0	0	1	0	0	0	1	0	0	0	0	0	8
PVP01_0212600	PVP01_0212600	PVP01_0212600.1	protein_coding	0	0	0	25	10	0	0	0	0	0	0	0	0	0	0	0	0	15
PVP01_0212700	PVP01_0212700	PVP01_0212700.1	protein_coding	0	3	1	20	8	0	0	1	0	0	0	0	0	0	0	0	3	12
PVP01_0212800	PVP01_0212800	PVP01_0212800.1	protein_coding	0	1	1	25	10	0	0	1	0	0	0	0	0	0	0	0	1	15
PVP01_0212900	PVP01_0212900	PVP01_0212900.1	protein_coding	0	0	2	22	11	0	0	2	0	0	0	0	0	0	0	0	0	11
PVP01_0213000	PVP01_0213000	PVP01_0213000.1	protein_coding	0	1	2	24	14	0	0	2	0	0	0	0	0	0	0	0	1	10
PVP01_0213100	PVP01_0213100	PVP01_0213100.1	protein_coding	0	1	0	24	10	0	2	0	0	0	0	0	0	0	0	0	1	12
PVP01_0213200	PVP01_0213200	PVP01_0213200.1	protein_coding	0	1	3	16	8	0	0	3	0	0	0	0	0	0	0	0	1	8
PVP01_0213300	PVP01_0213300	PVP01_0213300.1	protein_coding	0	3	2	25	14	0	2	2	0	0	0	1	0	0	0	0	3	9
PVP01_0213400	PVP01_0213400	PVP01_0213400.1	protein_coding	0	2	6	17	8	0	0	6	0	0	0	0	0	0	0	0	2	9
PVP01_0213500	PVP01_0213500	PVP01_0213500.1	protein_coding	0	2	3	42	28	0	0	3	0	0	0	0	0	0	0	0	2	14
PVP01_0213600	PVP01_0213600	PVP01_0213600.1	protein_coding	0	6	8	27	6	0	0	8	0	0	0	0	0	0	0	0	6	21
PVP01_0213700	PVP01_0213700	PVP01_0213700.1	protein_coding	0	0	0	17	10	0	0	0	0	0	0	0	0	0	0	0	0	7
PVP01_0213800	PVP01_0213800	PVP01_0213800.1	protein_coding	0	11	16	20	7	0	0	16	0	0	0	0	0	0	0	0	11	13
PVP01_0213900	PVP01_0213900	PVP01_0213900.1	protein_coding	0	0	5	22	13	0	1	5	0	0	0	0	0	0	0	0	0	8
PVP01_0214000	PVP01_0214000	PVP01_0214000.1	protein_coding	0	0	0	26	14	0	0	0	0	0	0	0	0	0	0	0	0	12
PVP01_0214100	PVP01_0214100	PVP01_0214100.1	protein_coding	0	0	1	26	14	0	0	1	0	0	0	0	0	0	0	0	0	12
PVP01_0214200	PVP01_0214200	PVP01_0214200.1	protein_coding	0	0	0	31	13	0	3	0	0	0	0	0	0	0	0	0	0	15
PVP01_0214300	PVP01_0214300	PVP01_0214300.1	protein_coding	0	2	9	19	4	0	3	9	0	0	0	0	0	0	0	0	2	12
PVP01_0214400	PVP01_0214400	PVP01_0214400.1	protein_coding	0	2	1	17	8	0	1	1	0	0	0	1	0	0	0	0	2	8
PVP01_0214500	PVP01_0214500	PVP01_0214500.1	protein_coding	0	0	4	17	11	0	0	4	0	0	0	0	0	0	0	0	0	6
PVP01_0214600	PVP01_0214600	PVP01_0214600.1	protein_coding	0	1	3	21	8	0	1	3	0	0	0	0	0	0	0	0	1	12
PVP01_0214700	PVP01_0214700	PVP01_0214700.1	protein_coding	0	0	1	29	17	0	1	1	0	0	0	0	0	0	0	0	0	11
PVP01_0214800	PVP01_0214800	PVP01_0214800.1	protein_coding	0	7	20	23	12	0	0	20	0	0	0	0	0	0	0	0	7	11
PVP01_0214900	PVP01_0214900	PVP01_0214900.1	protein_coding	0	0	0	30	14	0	0	0	0	0	0	0	0	0	0	0	0	16
PVP01_0215000	PVP01_0215000	PVP01_0215000.1	protein_coding	0	5	3	23	13	0	0	3	0	0	0	0	0	0	0	0	5	10
PVP01_0215100	PVP01_0215100	PVP01_0215100.1	protein_coding	0	0	1	29	15	0	0	1	0	0	0	0	0	0	0	0	0	14
PVP01_0215200	PVP01_0215200	PVP01_0215200.1	protein_coding	0	4	3	20	11	0	0	3	0	0	0	0	0	0	0	0	4	9
PVP01_0215300	PVP01_0215300	PVP01_0215300.1	protein_coding	0	0	0	25	10	0	0	0	0	0	0	0	0	0	0	0	0	15
PVP01_0215400	PVP01_0215400	PVP01_0215400.1	protein_coding	0	0	3	28	14	0	1	3	0	0	0	0	0	0	0	0	0	13
PVP01_0215500	PVP01_0215500	PVP01_0215500.1	protein_coding	0	0	0	19	10	0	0	0	0	0	0	0	0	0	0	0	0	9
PVP01_0215600	PVP01_0215600	PVP01_0215600.1	protein_coding	0	24	15	30	14	0	1	15	0	0	0	0	0	0	0	0	24	15
PVP01_0215700	PVP01_0215700	PVP01_0215700.1	protein_coding	0	0	0	28	12	0	1	0	0	0	0	0	0	0	0	0	0	15
PVP01_0215800	PVP01_0215800	PVP01_0215800.1	protein_coding	0	4	8	20	9	0	0	8	0	0	0	0	0	0	0	0	4	11
PVP01_0215900	PVP01_0215900	PVP01_0215900.1	protein_coding	0	1	2	30	15	0	1	2	0	0	0	0	0	0	0	0	1	14
PVP01_0216000	PVP01_0216000	PVP01_0216000.1	protein_coding	0	6	9	25	12	0	0	9	0	0	0	0	0	0	0	0	6	13
PVP01_0216100	PVP01_0216100	PVP01_0216100.1	protein_coding	0	0	0	21	5	0	1	0	0	0	0	0	0	0	0	0	0	15
PVP01_0216200	PVP01_0216200	PVP01_0216200.1	protein_coding	0	8	17	30	12	0	0	17	0	0	0	0	0	0	0	0	8	18
PVP01_0216300	PVP01_0216300	PVP01_0216300.1	protein_coding	0	0	0	40	23	0	0	0	0	0	0	0	0	0	0	0	0	17
PVP01_0216400	PVP01_0216400	PVP01_0216400.1	protein_coding	0	0	0	37	21	0	0	0	0	0	0	0	0	0	0	0	0	16
PVP01_0216500	PVP01_0216500	PVP01_0216500.1	protein_coding	0	0	3	33	7	0	4	3	0	0	0	0	0	0	0	0	0	22
PVP01_0216600	PVP01_0216600	PVP01_0216600.1	protein_coding	0	0	0	34	22	0	0	0	0	0	0	0	0	0	0	0	0	12
PVP01_0216700	PVP01_0216700	PVP01_0216700.1	protein_coding	0	3	1	33	22	0	1	1	0	0	0	0	0	0	0	0	3	10
PVP01_0216800	PVP01_0216800	PVP01_0216800.1	protein_coding	0	4	20	44	27	0	0	20	0	0	0	0	0	0	0	0	4	17
PVP01_0216900	PVP01_0216900	PVP01_0216900.1	protein_coding	0	3	19	36	29	0	0	19	0	0	0	0	0	0	0	0	3	7
PVP01_0217000	PVP01_0217000	PVP01_0217000.1	protein_coding	0	0	2	39	22	0	1	2	0	0	0	0	0	0	0	0	0	16
PVP01_0217100	PVP01_0217100	PVP01_0217100.1	protein_coding	0	0	3	38	16	0	0	3	0	0	0	0	0	0	0	0	0	22
PVP01_0217200	PVP01_0217200	PVP01_0217200.1	protein_coding	0	3	5	137	14	0	3	5	0	0	0	0	0	0	0	0	3	120
PVP01_0217300	PVP01_0217300	PVP01_0217300.1	protein_coding	1	16	51	308	198	0	24	51	0	0	0	4	0	1	0	0	13	89
PVP01_0217400	PVP01_0217400	PVP01_0217400.1	protein_coding	0	35	71	310	117	0	16	71	0	0	0	1	0	0	0	0	35	177
PVP01_0217500	PVP01_0217500	PVP01_0217500.1	protein_coding	0	18	35	252	73	0	12	35	0	0	0	1	0	0	0	0	17	168
PVP01_0217600	PVP01_0217600	PVP01_0217600.1	protein_coding	0	4	11	144	100	0	2	11	0	0	0	0	0	0	0	0	4	42
PVP01_0217700	PVP01_0217700	PVP01_0217700.1	protein_coding	0	2	1	127	69	0	1	1	0	0	0	0	0	0	0	0	2	57
PVP01_0217800	PVP01_0217800	PVP01_0217800.1	protein_coding	0	5	5	143	77	0	6	5	0	0	0	1	0	0	0	0	4	61
PVP01_0217900	PVP01_0217900	PVP01_0217900.1	protein_coding	0	1	11	99	78	0	10	11	0	0	0	1	0	0	0	0	0	12
PVP01_0218000	PVP01_0218000	PVP01_0218000.1	protein_coding	0	1	2	67	60	0	0	2	0	0	0	0	0	0	0	0	1	7
PVP01_0218100	PVP01_0218100	PVP01_0218100.1	protein_coding	1	2	3	23	16	0	1	3	0	0	0	1	0	1	0	0	1	7
PVP01_0218200	PVP01_0218200	PVP01_0218200.1	protein_coding	0	1	8	79	4	0	6	8	0	0	0	1	0	0	0	0	0	70
PVP01_0218300	PVP01_0218300	PVP01_0218300.1	protein_coding	0	1	0	88	42	0	12	0	0	0	0	0	0	0	0	0	1	34
PVP01_0218400	PVP01_0218400	PVP01_0218400.1	protein_coding	0	1	0	114	71	0	0	0	0	0	0	0	0	0	0	0	1	43
PVP01_0218500	PVP01_0218500	PVP01_0218500.1	protein_coding	0	0	0	50	0	0	0	0	0	0	0	0	0	0	0	0	0	50
PVP01_0218600	PVP01_0218600	PVP01_0218600.1	protein_coding	0	0	0	9	0	0	0	0	0	0	0	0	0	0	0	0	0	9
PVP01_0218800	PVP01_0218800	PVP01_0218800.1	protein_coding	0	0	0	15	15	0	0	0	0	0	0	0	0	0	0	0	0	0
PVP01_0218900	PVP01_0218900	PVP01_0218900.1	protein_coding	0	6	11	1	1	0	0	11	0	0	0	0	0	0	0	0	6	0
PVP01_0219000	PVP01_0219000	PVP01_0219000.1	protein_coding	0	0	0	19	2	0	0	0	0	0	0	0	0	0	0	0	0	17
PVP01_0219100	PVP01_0219100	PVP01_0219100.1	protein_coding	0	0	0	7	4	0	0	0	0	0	0	0	0	0	0	0	0	3
PVP01_0219200	PVP01_0219200	PVP01_0219200.1	protein_coding	0	0	1	11	6	0	0	1	0	0	0	0	0	0	0	0	0	5
PVP01_0219300	PVP01_0219300	PVP01_0219300.1	protein_coding	0	0	0	10	1	0	1	0	0	0	0	0	0	0	0	0	0	8
PVP01_0219400	PVP01_0219400	PVP01_0219400.1	protein_coding	0	0	0	6	6	0	0	0	0	0	0	0	0	0	0	0	0	0
PVP01_0219500	PVP01_0219500	PVP01_0219500.1	protein_coding	0	0	0	20	0	0	0	0	0	0	0	0	0	0	0	0	0	20
PVP01_0219600	PVP01_0219600	PVP01_0219600.1	protein_coding	0	1	5	31	6	0	2	5	0	0	0	0	0	0	0	0	1	23
PVP01_0219700	PVP01_0219700	PVP01_0219700.1	protein_coding	0	0	0	42	35	0	0	0	0	0	0	0	0	0	0	0	0	7
PVP01_0219800	PVP01_0219800	PVP01_0219800.1	protein_coding	0	0	0	7	6	0	1	0	0	0	0	0	0	0	0	0	0	0
PVP01_0219900	PVP01_0219900	PVP01_0219900.1	protein_coding	0	0	0	1	1	0	0	0	0	0	0	0	0	0	0	0	0	0
PVP01_0220000	PVP01_0220000	PVP01_0220000.1	protein_coding	0	0	0	61	0	0	0	0	0	0	0	0	0	0	0	0	0	61
PVP01_0220100	PVP01_0220100	PVP01_0220100.1	protein_coding	0	7	15	54	33	0	7	15	0	0	0	0	0	0	0	0	7	14
PVP01_0220200	PVP01_0220200	PVP01_0220200.1	protein_coding	0	1	1	101	31	0	5	1	0	0	0	0	0	0	0	0	1	65
PVP01_0220300	PVP01_0220300	PVP01_0220300.1	protein_coding	0	1	2	101	43	0	0	2	0	0	0	0	0	0	0	0	1	58
PVP01_0220400	PVP01_0220400	PVP01_0220400.1	protein_coding	0	1	1	55	19	0	0	1	0	0	0	0	0	0	0	0	1	36
PVP01_0220500	PVP01_0220500	PVP01_0220500.1	protein_coding	0	0	2	58	15	0	0	2	0	0	0	0	0	0	0	0	0	43
PVP01_0220600	PVP01_0220600	PVP01_0220600.1	protein_coding	0	1	3	28	13	0	0	3	0	0	0	0	0	0	0	0	1	15
PVP01_0220700	PVP01_0220700	PVP01_0220700.1	protein_coding	0	6	14	20	7	0	6	14	0	0	0	1	0	0	0	0	5	8
PVP01_0220800	PVP01_0220800	PVP01_0220800.1	protein_coding	0	0	0	62	25	0	0	0	0	0	0	0	0	0	0	0	0	37
PVP01_0220900	PVP01_0220900	PVP01_0220900.1	protein_coding	0	3	8	38	20	0	0	8	0	0	0	0	0	0	0	0	3	18
PVP01_0221000	PVP01_0221000	PVP01_0221000.1	protein_coding	0	0	0	36	29	0	0	0	0	0	0	0	0	0	0	0	0	7
PVP01_0221100	PVP01_0221100	PVP01_0221100.1	protein_coding	0	1	5	3	0	0	0	5	0	0	0	0	0	0	0	0	1	3
PVP01_0221200	PVP01_0221200	PVP01_0221200.1	protein_coding	0	0	0	9	9	0	0	0	0	0	0	0	0	0	0	0	0	0
PVP01_0221300	PVP01_0221300	PVP01_0221300.1	protein_coding	0	0	0	10	0	0	0	0	0	0	0	0	0	0	0	0	0	10
PVP01_0221400	PVP01_0221400	PVP01_0221400.1	protein_coding	0	0	5	8	5	0	0	5	0	0	0	0	0	0	0	0	0	3
PVP01_0221500	PVP01_0221500	PVP01_0221500.1	protein_coding	0	0	0	11	5	0	0	0	0	0	0	0	0	0	0	0	0	6
PVP01_0221600	PVP01_0221600	PVP01_0221600.1	protein_coding	0	0	3	8	5	0	1	3	0	0	0	0	0	0	0	0	0	2
PVP01_0221700	PVP01_0221700	PVP01_0221700.1	protein_coding	0	0	0	47	6	0	0	0	0	0	0	0	0	0	0	0	0	41
PVP01_0221800	PVP01_0221800	PVP01_0221800.1	protein_coding	0	0	0	80	13	0	1	0	0	0	0	0	0	0	0	0	0	66
PVP01_0300100	PVP01_0300100	PVP01_0300100.1	protein_coding	0	9	8	184	23	0	9	8	0	0	0	2	0	0	0	0	8	153
PVP01_0300200	PVP01_0300200	PVP01_0300200.1	protein_coding	0	1	12	267	114	0	1	12	0	0	0	2	0	0	0	0	1	152
PVP01_0300300	PVP01_0300300	PVP01_0300300.1	protein_coding	1	6	33	150	59	0	2	33	0	0	0	0	0	1	0	0	6	89
PVP01_0300400	PVP01_0300400	PVP01_0300400.1	protein_coding	0	6	17	147	78	0	1	17	0	0	0	0	0	0	0	0	6	68
PVP01_0300500	PVP01_0300500	PVP01_0300500.1	protein_coding	2	9	20	249	163	0	4	20	0	0	2	0	0	0	0	0	9	84
PVP01_0300600	PVP01_0300600	PVP01_0300600.1	protein_coding	0	2	6	226	54	0	0	6	0	0	0	0	0	0	0	0	2	172
PVP01_0300700	PVP01_0300700	PVP01_0300700.1	protein_coding	0	4	4	171	113	0	1	4	0	0	0	0	0	0	0	0	4	57
PVP01_0300800	PVP01_0300800	PVP01_0300800.1	protein_coding	0	0	1	177	58	0	0	1	0	0	0	0	0	0	0	0	0	119
PVP01_0300900	PVP01_0300900	PVP01_0300900.1	protein_coding	1	2	18	102	81	0	1	18	0	0	0	0	0	1	0	0	2	20
PVP01_0301000	PVP01_0301000	PVP01_0301000.1	protein_coding	0	1	1	143	76	0	0	1	0	0	0	0	0	0	0	0	1	67
PVP01_0301100	PVP01_0301100	PVP01_0301100.1	protein_coding	0	8	6	130	19	0	14	6	0	0	0	2	0	0	0	0	8	97
PVP01_0301200	PVP01_0301200	PVP01_0301200.1	protein_coding	1	0	2	133	37	0	0	2	0	0	0	0	0	1	0	0	0	96
PVP01_0301300	PVP01_0301300	PVP01_0301300.1	protein_coding	0	9	24	204	9	0	0	24	0	0	0	0	0	0	0	0	9	195
PVP01_0301400	PVP01_0301400	PVP01_0301400.1	protein_coding	2	23	63	360	82	0	18	63	0	0	0	2	0	2	0	1	21	261
PVP01_0301500	PVP01_0301500	PVP01_0301500.1	protein_coding	0	2	5	513	247	0	9	5	0	0	0	1	0	0	0	0	2	257
PVP01_0301600	PVP01_0301600	PVP01_0301600.1	protein_coding	0	13	23	484	290	0	14	23	0	0	0	2	0	0	0	0	12	181
PVP01_0301700	PVP01_0301700	PVP01_0301700.1	protein_coding	0	11	30	548	296	0	1	30	0	0	0	0	0	0	0	0	11	251
PVP01_0301800	PVP01_0301800	PVP01_0301800.1	protein_coding	0	3	17	571	295	0	9	17	0	0	0	0	0	0	0	0	3	267
PVP01_0301900	PVP01_0301900	PVP01_0301900.1	protein_coding	0	4	16	537	269	0	2	16	0	0	0	0	0	0	0	0	4	266
PVP01_0302000	PVP01_0302000	PVP01_0302000.1	protein_coding	0	6	8	308	34	0	6	8	0	0	0	1	0	0	0	0	5	269
PVP01_0302100	PVP01_0302100	PVP01_0302100.1	protein_coding	0	3	3	120	70	0	5	3	0	0	0	0	0	0	0	0	3	45
PVP01_0302200	PVP01_0302200	PVP01_0302200.1	protein_coding	0	0	0	104	67	0	0	0	0	0	0	0	0	0	0	0	0	37
PVP01_0302300	PVP01_0302300	PVP01_0302300.1	protein_coding	0	9	3	160	36	0	0	3	0	0	0	0	0	0	0	0	9	124
PVP01_0302400	PVP01_0302400	PVP01_0302400.1	protein_coding	0	0	4	183	111	0	0	4	0	0	0	0	0	0	0	0	0	72
PVP01_0302500	PVP01_0302500	PVP01_0302500.1	protein_coding	0	1	2	196	78	0	23	2	0	0	0	1	0	0	0	0	0	96
PVP01_0302600	PVP01_0302600	PVP01_0302600.1	protein_coding	0	109	89	141	28	0	7	89	0	0	0	1	0	0	0	0	108	107
PVP01_0302700	PVP01_0302700	PVP01_0302700.1	protein_coding	0	4	1	61	9	0	0	1	0	0	0	0	0	0	0	0	4	52
PVP01_0302800	PVP01_0302800	PVP01_0302800.1	protein_coding	0	0	4	36	19	0	0	4	0	0	0	0	0	0	0	0	0	17
PVP01_0302900	PVP01_0302900	PVP01_0302900.1	protein_coding	0	3	3	33	16	0	1	3	0	0	0	0	0	0	0	0	3	16
PVP01_0303000	PVP01_0303000	PVP01_0303000.1	protein_coding	0	2	0	24	10	0	2	0	0	0	0	0	0	0	0	0	2	12
PVP01_0303100	PVP01_0303100	PVP01_0303100.1	protein_coding	0	2	3	27	11	0	0	3	0	0	0	0	0	0	0	0	2	16
PVP01_0303200	PVP01_0303200	PVP01_0303200.1	protein_coding	0	9	6	28	11	0	1	6	0	0	0	0	0	0	0	0	9	16
PVP01_0303300	PVP01_0303300	PVP01_0303300.1	protein_coding	0	0	0	31	16	0	0	0	0	0	0	0	0	0	0	0	0	15
PVP01_0303400	PVP01_0303400	PVP01_0303400.1	protein_coding	0	10	26	31	18	0	1	26	0	0	0	0	0	0	0	0	10	12
PVP01_0303500	PVP01_0303500	PVP01_0303500.1	protein_coding	0	1	0	24	13	0	1	0	0	0	0	0	0	0	0	0	1	10
PVP01_0303600	PVP01_0303600	PVP01_0303600.1	protein_coding	0	1	0	32	10	0	7	0	0	0	0	0	0	0	0	0	1	15
PVP01_0303700	PVP01_0303700	PVP01_0303700.1	protein_coding	0	1	3	26	13	0	0	3	0	0	0	0	0	0	0	0	1	13
PVP01_0303800	PVP01_0303800	PVP01_0303800.1	protein_coding	0	1	4	29	16	0	0	4	0	0	0	0	0	0	0	0	1	13
PVP01_0303900	PVP01_0303900	PVP01_0303900.1	protein_coding	0	0	2	31	12	0	0	2	0	0	0	0	0	0	0	0	0	19
PVP01_0304000	PVP01_0304000	PVP01_0304000.1	protein_coding	0	8	21	52	25	0	0	21	0	0	0	0	0	0	0	0	8	27
PVP01_0304100	PVP01_0304100	PVP01_0304100.1	protein_coding	0	2	5	44	14	0	0	5	0	0	0	0	0	0	0	0	2	30
PVP01_0304200	PVP01_0304200	PVP01_0304200.1	protein_coding	0	3	9	39	13	0	4	9	0	0	0	0	0	0	0	0	3	22
PVP01_0304300	PVP01_0304300	PVP01_0304300.1	protein_coding	0	4	8	35	22	0	0	8	0	0	0	0	0	0	0	0	4	13
PVP01_0304400	PVP01_0304400	PVP01_0304400.1	protein_coding	0	1	1	44	30	0	2	1	0	0	0	0	0	0	0	0	1	12
PVP01_0304500	PVP01_0304500	PVP01_0304500.1	protein_coding	0	7	11	23	12	0	3	11	0	0	0	0	0	0	0	0	7	8
PVP01_0304600	PVP01_0304600	PVP01_0304600.1	protein_coding	0	1	2	30	15	0	4	2	0	0	0	0	0	0	0	0	1	11
PVP01_0304700	PVP01_0304700	PVP01_0304700.1	protein_coding	0	21	43	22	12	0	0	43	0	0	0	0	0	0	0	0	21	10
PVP01_0304800	PVP01_0304800	PVP01_0304800.1	protein_coding	0	10	2	25	11	0	1	2	0	0	0	0	0	0	0	0	10	13
PVP01_0304900	PVP01_0304900	PVP01_0304900.1	protein_coding	0	0	0	20	8	0	1	0	0	0	0	0	0	0	0	0	0	11
PVP01_0305000	PVP01_0305000	PVP01_0305000.1	protein_coding	0	0	1	23	10	0	3	1	0	0	0	0	0	0	0	0	0	10
PVP01_0305100	PVP01_0305100	PVP01_0305100.1	protein_coding	0	5	7	24	12	0	0	7	0	0	0	0	0	0	0	0	5	12
PVP01_0305200	PVP01_0305200	PVP01_0305200.1	protein_coding	0	0	0	24	9	0	0	0	0	0	0	0	0	0	0	0	0	15
PVP01_0305300	PVP01_0305300	PVP01_0305300.1	protein_coding	0	1	6	23	12	0	0	6	0	0	0	0	0	0	0	0	1	11
PVP01_0305400	PVP01_0305400	PVP01_0305400.1	protein_coding	0	1	0	29	13	0	0	0	0	0	0	0	0	0	0	0	1	16
PVP01_0305500	PVP01_0305500	PVP01_0305500.1	protein_coding	0	1	0	25	11	0	2	0	0	0	0	0	0	0	0	0	1	12
PVP01_0305600	PVP01_0305600	PVP01_0305600.1	protein_coding	0	0	0	22	12	0	0	0	0	0	0	0	0	0	0	0	0	10
PVP01_0305700	PVP01_0305700	PVP01_0305700.1	protein_coding	0	0	0	38	22	0	2	0	0	0	0	0	0	0	0	0	0	14
PVP01_0305800	PVP01_0305800	PVP01_0305800.1	protein_coding	0	0	12	32	12	0	0	12	0	0	0	0	0	0	0	0	0	20
PVP01_0305900	PVP01_0305900	PVP01_0305900.1	protein_coding	0	0	0	36	12	0	0	0	0	0	0	0	0	0	0	0	0	24
PVP01_0306000	PVP01_0306000	PVP01_0306000.1	protein_coding	0	2	1	41	18	0	4	1	0	0	0	1	0	0	0	0	1	20
PVP01_0306100	PVP01_0306100	PVP01_0306100.1	protein_coding	0	1	1	29	12	0	2	1	0	0	0	0	0	0	0	0	1	15
PVP01_0306200	PVP01_0306200	PVP01_0306200.1	protein_coding	0	7	12	25	10	0	3	12	0	0	0	1	0	0	0	0	6	13
PVP01_0306300	PVP01_0306300	PVP01_0306300.1	protein_coding	0	4	5	15	9	0	0	5	0	0	0	0	0	0	0	0	4	6
PVP01_0306400	PVP01_0306400	PVP01_0306400.1	protein_coding	0	1	0	22	11	0	0	0	0	0	0	0	0	0	0	0	1	11
PVP01_0306500	PVP01_0306500	PVP01_0306500.1	protein_coding	0	1	0	25	12	0	0	0	0	0	0	1	0	0	0	0	1	13
PVP01_0306600	PVP01_0306600	PVP01_0306600.1	protein_coding	0	1	6	18	12	0	0	6	0	0	0	0	0	0	0	0	1	6
PVP01_0306700	PVP01_0306700	PVP01_0306700.1	protein_coding	0	0	1	23	10	0	0	1	0	0	0	0	0	0	0	0	0	13
PVP01_0306800	PVP01_0306800	PVP01_0306800.1	protein_coding	0	1	0	25	7	0	4	0	0	0	0	0	0	0	0	0	1	14
PVP01_0306900	PVP01_0306900	PVP01_0306900.1	protein_coding	0	2	4	21	11	0	0	4	0	0	0	0	0	0	0	0	2	10
PVP01_0307000	PVP01_0307000	PVP01_0307000.1	protein_coding	0	7	5	27	6	0	1	5	0	0	0	0	0	0	0	0	7	20
PVP01_0307100	PVP01_0307100	PVP01_0307100.1	protein_coding	0	6	13	28	16	0	0	13	0	0	0	0	0	0	0	0	6	12
PVP01_0307200	PVP01_0307200	PVP01_0307200.1	protein_coding	0	5	1	32	19	0	0	1	0	0	0	0	0	0	0	0	5	13
PVP01_0307300	PVP01_0307300	PVP01_0307300.1	protein_coding	0	1	0	23	12	0	0	0	0	0	0	0	0	0	0	0	1	11
PVP01_0307400	PVP01_0307400	PVP01_0307400.1	protein_coding	0	3	5	30	18	0	0	5	0	0	0	0	0	0	0	0	3	12
PVP01_0307500	PVP01_0307500	PVP01_0307500.1	protein_coding	0	0	5	28	18	0	0	5	0	0	0	0	0	0	0	0	0	10
PVP01_0307600	PVP01_0307600	PVP01_0307600.1	protein_coding	0	3	4	27	14	0	4	4	0	0	0	0	0	0	0	0	3	9
PVP01_0307700	PVP01_0307700	PVP01_0307700.1	protein_coding	0	2	1	24	16	0	1	1	0	0	0	0	0	0	0	0	2	7
PVP01_0307800	PVP01_0307800	PVP01_0307800.1	protein_coding	0	2	1	27	11	0	0	1	0	0	0	0	0	0	0	0	2	16
PVP01_0307900	PVP01_0307900	PVP01_0307900.1	protein_coding	0	3	3	25	12	0	0	3	0	0	0	0	0	0	0	0	3	13
PVP01_0308000	PVP01_0308000	PVP01_0308000.1	protein_coding	0	2	1	36	18	0	3	1	0	0	0	0	0	0	0	0	2	15
PVP01_0308100	PVP01_0308100	PVP01_0308100.1	protein_coding	0	0	4	22	9	0	0	4	0	0	0	0	0	0	0	0	0	13
PVP01_0308200	PVP01_0308200	PVP01_0308200.1	protein_coding	0	1	1	33	13	0	5	1	0	0	0	0	0	0	0	0	1	15
PVP01_0308300	PVP01_0308300	PVP01_0308300.1	protein_coding	0	3	10	23	13	0	0	10	0	0	0	0	0	0	0	0	3	10
PVP01_0308400	PVP01_0308400	PVP01_0308400.1	protein_coding	0	2	1	20	10	0	0	1	0	0	0	0	0	0	0	0	2	10
PVP01_0308500	PVP01_0308500	PVP01_0308500.1	protein_coding	0	2	1	20	12	0	0	1	0	0	0	0	0	0	0	0	2	8
PVP01_0308600	PVP01_0308600	PVP01_0308600.1	protein_coding	0	3	3	25	10	0	0	3	0	0	0	0	0	0	0	0	3	15
PVP01_0308700	PVP01_0308700	PVP01_0308700.1	protein_coding	0	3	3	20	8	0	0	3	0	0	0	0	0	0	0	0	3	12
PVP01_0308800	PVP01_0308800	PVP01_0308800.1	protein_coding	0	0	1	24	16	0	0	1	0	0	0	0	0	0	0	0	0	8
PVP01_0308900	PVP01_0308900	PVP01_0308900.1	protein_coding	0	3	1	31	13	0	0	1	0	0	0	0	0	0	0	0	3	18
PVP01_0309000	PVP01_0309000	PVP01_0309000.1	protein_coding	0	1	0	28	12	0	6	0	0	0	0	1	0	0	0	0	0	11
PVP01_0309100	PVP01_0309100	PVP01_0309100.1	protein_coding	0	0	3	37	19	0	0	3	0	0	0	0	0	0	0	0	0	18
PVP01_0309200	PVP01_0309200	PVP01_0309200.1	protein_coding	0	1	1	42	14	0	5	1	0	0	0	0	0	0	0	0	1	23
PVP01_0309300	PVP01_0309300	PVP01_0309300.1	protein_coding	0	3	10	35	18	0	0	10	0	0	0	0	0	0	0	0	3	17
PVP01_0309400	PVP01_0309400	PVP01_0309400.1	protein_coding	0	0	0	38	17	0	0	0	0	0	0	0	0	0	0	0	0	21
PVP01_0309500	PVP01_0309500	PVP01_0309500.1	protein_coding	0	0	0	34	23	0	0	0	0	0	0	0	0	0	0	0	0	11
PVP01_0309600	PVP01_0309600	PVP01_0309600.1	protein_coding	0	3	3	31	16	0	0	3	0	0	0	0	0	0	0	0	3	15
PVP01_0309700	PVP01_0309700	PVP01_0309700.1	protein_coding	0	2	0	25	11	0	0	0	0	0	0	0	0	0	0	0	2	14
PVP01_0309800	PVP01_0309800	PVP01_0309800.1	protein_coding	0	0	4	23	11	0	0	4	0	0	0	0	0	0	0	0	0	12
PVP01_0309900	PVP01_0309900	PVP01_0309900.1	protein_coding	0	0	0	33	18	0	2	0	0	0	0	0	0	0	0	0	0	13
PVP01_0310000	PVP01_0310000	PVP01_0310000.1	protein_coding	0	3	10	24	11	0	0	10	0	0	0	0	0	0	0	0	3	13
PVP01_0310100	PVP01_0310100	PVP01_0310100.1	protein_coding	0	8	5	29	12	0	0	5	0	0	0	0	0	0	0	0	8	17
PVP01_0310200	PVP01_0310200	PVP01_0310200.1	protein_coding	0	2	3	32	14	0	0	3	0	0	0	0	0	0	0	0	2	18
PVP01_0310300	PVP01_0310300	PVP01_0310300.1	protein_coding	0	4	5	36	22	0	0	5	0	0	0	0	0	0	0	0	4	14
PVP01_0310400	PVP01_0310400	PVP01_0310400.1	protein_coding	0	1	4	36	21	0	0	4	0	0	0	0	0	0	0	0	1	15
PVP01_0310500	PVP01_0310500	PVP01_0310500.1	protein_coding	0	2	5	33	26	0	0	5	0	0	0	0	0	0	0	0	2	7
PVP01_0310600	PVP01_0310600	PVP01_0310600.1	protein_coding	0	0	3	31	14	0	0	3	0	0	0	0	0	0	0	0	0	17
PVP01_0310700	PVP01_0310700	PVP01_0310700.1	protein_coding	0	4	3	34	13	0	0	3	0	0	0	0	0	0	0	0	4	21
PVP01_0310800	PVP01_0310800	PVP01_0310800.1	protein_coding	0	0	0	38	27	0	0	0	0	0	0	0	0	0	0	0	0	11
PVP01_0310900	PVP01_0310900	PVP01_0310900.1	protein_coding	0	0	0	39	15	0	0	0	0	0	0	0	0	0	0	0	0	24
PVP01_0311000	PVP01_0311000	PVP01_0311000.1	protein_coding	0	0	2	37	16	0	0	2	0	0	0	0	0	0	0	0	0	21
PVP01_0311100	PVP01_0311100	PVP01_0311100.1	protein_coding	0	6	12	28	21	0	0	12	0	0	0	0	0	0	0	0	6	7
PVP01_0311200	PVP01_0311200	PVP01_0311200.1	protein_coding	0	9	12	27	18	0	1	12	0	0	0	1	0	0	0	0	8	9
PVP01_0311300	PVP01_0311300	PVP01_0311300.1	protein_coding	0	8	1	29	15	0	6	1	0	0	0	0	0	0	0	0	8	8
PVP01_0311400	PVP01_0311400	PVP01_0311400.1	protein_coding	0	0	0	44	28	0	0	0	0	0	0	0	0	0	0	0	0	16
PVP01_0311500	PVP01_0311500	PVP01_0311500.1	protein_coding	0	1	7	27	7	0	0	7	0	0	0	0	0	0	0	0	1	20
PVP01_0311600	PVP01_0311600	PVP01_0311600.1	protein_coding	0	2	5	31	18	0	0	5	0	0	0	0	0	0	0	0	2	13
PVP01_0311700	PVP01_0311700	PVP01_0311700.1	protein_coding	0	0	1	40	12	0	0	1	0	0	0	0	0	0	0	0	0	28
PVP01_0311800	PVP01_0311800	PVP01_0311800.1	protein_coding	0	1	7	36	21	0	0	7	0	0	0	0	0	0	0	0	1	15
PVP01_0311900	PVP01_0311900	PVP01_0311900.1	protein_coding	0	4	6	36	17	0	0	6	0	0	0	0	0	0	0	0	4	19
PVP01_0312000	PVP01_0312000	PVP01_0312000.1	protein_coding	0	2	4	43	22	0	0	4	0	0	0	0	0	0	0	0	2	21
PVP01_0312100	PVP01_0312100	PVP01_0312100.1	protein_coding	0	2	3	36	20	0	0	3	0	0	0	0	0	0	0	0	2	16
PVP01_0312200	PVP01_0312200	PVP01_0312200.1	protein_coding	0	5	3	28	11	0	6	3	0	0	0	0	0	0	0	0	5	11
PVP01_0312300	PVP01_0312300	PVP01_0312300.1	protein_coding	0	1	1	42	16	0	2	1	0	0	0	0	0	0	0	0	1	24
PVP01_0312400	PVP01_0312400	PVP01_0312400.1	protein_coding	0	1	0	46	21	0	2	0	0	0	0	0	0	0	0	0	1	23
PVP01_0312500	PVP01_0312500	PVP01_0312500.1	protein_coding	0	2	6	41	28	0	0	6	0	0	0	0	0	0	0	0	2	13
PVP01_0312600	PVP01_0312600	PVP01_0312600.1	protein_coding	0	0	0	48	13	0	11	0	0	0	0	0	0	0	0	0	0	24
PVP01_0312700	PVP01_0312700	PVP01_0312700.1	protein_coding	0	2	2	37	14	0	0	2	0	0	0	0	0	0	0	0	2	23
PVP01_0312800	PVP01_0312800	PVP01_0312800.1	protein_coding	0	1	1	31	13	0	4	1	0	0	0	0	0	0	0	0	1	14
PVP01_0312900	PVP01_0312900	PVP01_0312900.1	protein_coding	0	1	0	40	25	0	1	0	0	0	0	0	0	0	0	0	1	14
PVP01_0313000	PVP01_0313000	PVP01_0313000.1	protein_coding	0	0	3	42	15	0	0	3	0	0	0	0	0	0	0	0	0	27
PVP01_0313100	PVP01_0313100	PVP01_0313100.1	protein_coding	0	6	2	43	28	0	8	2	0	0	0	0	0	0	0	0	6	7
PVP01_0313200	PVP01_0313200	PVP01_0313200.1	protein_coding	0	8	7	40	14	0	0	7	0	0	0	0	0	0	0	0	8	26
PVP01_0313300	PVP01_0313300	PVP01_0313300.1	protein_coding	0	1	0	47	20	0	0	0	0	0	0	0	0	0	0	0	1	27
PVP01_0313400	PVP01_0313400	PVP01_0313400.1	protein_coding	0	6	1	39	14	0	7	1	0	0	0	0	0	0	0	0	6	18
PVP01_0313500	PVP01_0313500	PVP01_0313500.1	protein_coding	0	2	7	30	15	0	0	7	0	0	0	0	0	0	0	0	2	15
PVP01_0313600	PVP01_0313600	PVP01_0313600.1	protein_coding	0	3	5	24	17	0	0	5	0	0	0	0	0	0	0	0	3	7
PVP01_0313700	PVP01_0313700	PVP01_0313700.1	protein_coding	0	0	0	17	9	0	2	0	0	0	0	0	0	0	0	0	0	6
PVP01_0313800	PVP01_0313800	PVP01_0313800.1	protein_coding	0	14	11	15	6	0	5	11	0	0	0	0	0	0	0	0	14	4
PVP01_0313900	PVP01_0313900	PVP01_0313900.1	protein_coding	0	4	9	7	4	0	0	9	0	0	0	0	0	0	0	0	4	3
PVP01_0314000	PVP01_0314000	PVP01_0314000.1	protein_coding	0	6	9	25	7	0	7	9	0	0	0	0	0	0	0	0	6	11
PVP01_0314100	PVP01_0314100	PVP01_0314100.1	protein_coding	0	0	0	28	21	0	0	0	0	0	0	0	0	0	0	0	0	7
PVP01_0314200	PVP01_0314200	PVP01_0314200.1	protein_coding	0	2	0	27	13	0	6	0	0	0	0	0	0	0	0	0	2	8
PVP01_0314300	PVP01_0314300	PVP01_0314300.1	protein_coding	0	2	3	38	15	0	3	3	0	0	0	1	0	0	0	0	1	21
PVP01_0314400	PVP01_0314400	PVP01_0314400.1	protein_coding	0	0	4	25	14	0	0	4	0	0	0	0	0	0	0	0	0	11
PVP01_0314500	PVP01_0314500	PVP01_0314500.1	protein_coding	0	1	1	30	18	0	0	1	0	0	0	0	0	0	0	0	1	12
PVP01_0314600	PVP01_0314600	PVP01_0314600.1	protein_coding	0	0	2	24	10	0	1	2	0	0	0	0	0	0	0	0	0	13
PVP01_0314700	PVP01_0314700	PVP01_0314700.1	protein_coding	0	0	0	21	9	0	0	0	0	0	0	0	0	0	0	0	0	12
PVP01_0314800	PVP01_0314800	PVP01_0314800.1	protein_coding	0	0	0	22	10	0	4	0	0	0	0	0	0	0	0	0	0	8
PVP01_0314900	PVP01_0314900	PVP01_0314900.1	protein_coding	0	0	0	24	13	0	1	0	0	0	0	0	0	0	0	0	0	10
PVP01_0315000	PVP01_0315000	PVP01_0315000.1	protein_coding	0	3	0	23	14	0	0	0	0	0	0	0	0	0	0	0	3	9
PVP01_0315100	PVP01_0315100	PVP01_0315100.1	protein_coding	0	3	6	25	12	0	0	6	0	0	0	0	0	0	0	0	3	13
PVP01_0315200	PVP01_0315200	PVP01_0315200.1	protein_coding	0	2	1	32	11	0	0	1	0	0	0	0	0	0	0	0	2	21
PVP01_0315300	PVP01_0315300	PVP01_0315300.1	protein_coding	0	0	0	33	16	0	0	0	0	0	0	0	0	0	0	0	0	17
PVP01_0315400	PVP01_0315400	PVP01_0315400.1	protein_coding	0	0	0	42	20	0	0	0	0	0	0	0	0	0	0	0	0	22
PVP01_0315500	PVP01_0315500	PVP01_0315500.1	protein_coding	0	0	1	54	21	0	0	1	0	0	0	0	0	0	0	0	0	33
PVP01_0315600	PVP01_0315600	PVP01_0315600.1	protein_coding	0	15	20	43	24	0	0	20	0	0	0	0	0	0	0	0	15	19
PVP01_0315700	PVP01_0315700	PVP01_0315700.1	protein_coding	0	0	1	34	19	0	0	1	0	0	0	0	0	0	0	0	0	15
PVP01_0315800	PVP01_0315800	PVP01_0315800.1	protein_coding	0	0	0	36	13	0	0	0	0	0	0	0	0	0	0	0	0	23
PVP01_0315900	PVP01_0315900	PVP01_0315900.1	protein_coding	0	0	1	40	22	0	5	1	0	0	0	0	0	0	0	0	0	13
PVP01_0316000	PVP01_0316000	PVP01_0316000.1	protein_coding	0	0	1	45	22	0	2	1	0	0	0	0	0	0	0	0	0	21
PVP01_0316100	PVP01_0316100	PVP01_0316100.1	protein_coding	0	6	4	40	22	0	0	4	0	0	0	0	0	0	0	0	6	18
PVP01_0316200	PVP01_0316200	PVP01_0316200.1	protein_coding	0	1	0	45	21	0	7	0	0	0	0	1	0	0	0	0	0	18
PVP01_0316300	PVP01_0316300	PVP01_0316300.1	protein_coding	0	0	1	44	25	0	5	1	0	0	0	0	0	0	0	0	0	14
PVP01_0316400	PVP01_0316400	PVP01_0316400.1	protein_coding	0	7	13	42	16	0	6	13	0	0	0	0	0	0	0	0	7	20
PVP01_0316500	PVP01_0316500	PVP01_0316500.1	protein_coding	0	0	0	36	9	0	8	0	0	0	0	0	0	0	0	0	0	19
PVP01_0316600	PVP01_0316600	PVP01_0316600.1	protein_coding	0	1	1	26	9	0	0	1	0	0	0	0	0	0	0	0	1	17
PVP01_0316700	PVP01_0316700	PVP01_0316700.1	protein_coding	0	7	9	28	12	0	0	9	0	0	0	0	0	0	0	0	7	16
PVP01_0316800	PVP01_0316800	PVP01_0316800.1	protein_coding	0	1	2	29	12	0	0	2	0	0	0	0	0	0	0	0	1	17
PVP01_0316900	PVP01_0316900	PVP01_0316900.1	protein_coding	0	1	3	33	17	0	0	3	0	0	0	0	0	0	0	0	1	16
PVP01_0317000	PVP01_0317000	PVP01_0317000.1	protein_coding	0	5	2	30	17	0	0	2	0	0	0	0	0	0	0	0	5	13
PVP01_0317100	PVP01_0317100	PVP01_0317100.1	protein_coding	0	0	0	33	12	0	5	0	0	0	0	0	0	0	0	0	0	16
PVP01_0317200	PVP01_0317200	PVP01_0317200.1	protein_coding	0	4	4	23	8	0	0	4	0	0	0	0	0	0	0	0	4	15
PVP01_0317300	PVP01_0317300	PVP01_0317300.1	protein_coding	0	0	0	23	15	0	0	0	0	0	0	0	0	0	0	0	0	8
PVP01_0317400	PVP01_0317400	PVP01_0317400.1	protein_coding	0	0	1	36	27	0	0	1	0	0	0	0	0	0	0	0	0	9
PVP01_0317500	PVP01_0317500	PVP01_0317500.1	protein_coding	0	1	0	40	21	0	9	0	0	0	0	0	0	0	0	0	1	10
PVP01_0317600	PVP01_0317600	PVP01_0317600.1	protein_coding	0	0	0	44	25	0	1	0	0	0	0	0	0	0	0	0	0	18
PVP01_0317700	PVP01_0317700	PVP01_0317700.1	protein_coding	0	4	1	49	23	0	0	1	0	0	0	0	0	0	0	0	4	26
PVP01_0317800	PVP01_0317800	PVP01_0317800.1	protein_coding	0	1	4	49	28	0	0	4	0	0	0	0	0	0	0	0	1	21
PVP01_0317900	PVP01_0317900	PVP01_0317900.1	protein_coding	0	4	8	49	26	0	0	8	0	0	0	0	0	0	0	0	4	23
PVP01_0318000	PVP01_0318000	PVP01_0318000.1	protein_coding	0	4	6	44	30	0	0	6	0	0	0	0	0	0	0	0	4	14
PVP01_0318100	PVP01_0318100	PVP01_0318100.1	protein_coding	0	1	0	39	10	0	0	0	0	0	0	0	0	0	0	0	1	29
PVP01_0318200	PVP01_0318200	PVP01_0318200.1	protein_coding	0	1	0	30	20	0	0	0	0	0	0	0	0	0	0	0	1	10
PVP01_0318300	PVP01_0318300	PVP01_0318300.1	protein_coding	0	4	1	30	13	0	0	1	0	0	0	0	0	0	0	0	4	17
PVP01_0318400	PVP01_0318400	PVP01_0318400.1	protein_coding	0	0	0	28	20	0	0	0	0	0	0	0	0	0	0	0	0	8
PVP01_0318500	PVP01_0318500	PVP01_0318500.1	protein_coding	0	1	2	39	28	0	0	2	0	0	0	0	0	0	0	0	1	11
PVP01_0318600	PVP01_0318600	PVP01_0318600.1	protein_coding	0	1	2	45	15	0	7	2	0	0	0	1	0	0	0	1	0	23
PVP01_0318700	PVP01_0318700	PVP01_0318700.1	protein_coding	0	3	7	33	20	0	0	7	0	0	0	0	0	0	0	0	3	13
PVP01_0318800	PVP01_0318800	PVP01_0318800.1	protein_coding	0	1	4	34	22	0	0	4	0	0	0	0	0	0	0	0	1	12
PVP01_0318900	PVP01_0318900	PVP01_0318900.1	protein_coding	0	1	1	43	20	0	0	1	0	0	0	0	0	0	0	0	1	23
PVP01_0319000	PVP01_0319000	PVP01_0319000.1	protein_coding	1	8	6	22	12	0	0	6	0	0	0	0	0	1	0	0	8	10
PVP01_0319100	PVP01_0319100	PVP01_0319100.1	protein_coding	0	0	11	40	21	0	0	11	0	0	0	0	0	0	0	0	0	19
PVP01_0319200	PVP01_0319200	PVP01_0319200.1	protein_coding	0	3	2	39	13	0	0	2	0	0	0	0	0	0	0	0	3	26
PVP01_0319300	PVP01_0319300	PVP01_0319300.1	protein_coding	0	0	0	46	28	0	0	0	0	0	0	0	0	0	0	0	0	18
PVP01_0319400	PVP01_0319400	PVP01_0319400.1	protein_coding	0	8	8	32	13	0	0	8	0	0	0	0	0	0	0	0	8	19
PVP01_0319500	PVP01_0319500	PVP01_0319500.1	protein_coding	0	6	6	54	21	0	6	6	0	0	0	1	0	0	0	0	5	28
PVP01_0319600	PVP01_0319600	PVP01_0319600.1	protein_coding	0	4	6	44	17	0	9	6	0	0	0	0	0	0	0	0	4	18
PVP01_0319700	PVP01_0319700	PVP01_0319700.1	protein_coding	0	8	8	27	13	0	0	8	0	0	0	0	0	0	0	0	8	14
PVP01_0319800	PVP01_0319800	PVP01_0319800.1	protein_coding	0	4	4	46	15	0	0	4	0	0	0	0	0	0	0	0	4	31
PVP01_0319900	PVP01_0319900	PVP01_0319900.1	protein_coding	0	5	4	36	25	0	0	4	0	0	0	0	0	0	0	0	5	11
PVP01_0320000	PVP01_0320000	PVP01_0320000.1	protein_coding	0	0	2	36	9	0	2	2	0	0	0	0	0	0	0	0	0	25
PVP01_0320100	PVP01_0320100	PVP01_0320100.1	protein_coding	0	0	0	34	18	0	0	0	0	0	0	0	0	0	0	0	0	16
PVP01_0320200	PVP01_0320200	PVP01_0320200.1	protein_coding	0	1	2	34	23	0	0	2	0	0	0	0	0	0	0	0	1	11
PVP01_0320300	PVP01_0320300	PVP01_0320300.1	protein_coding	0	12	15	30	10	0	6	15	0	0	0	3	0	0	0	0	10	16
PVP01_0320400	PVP01_0320400	PVP01_0320400.1	protein_coding	0	13	18	51	24	0	10	18	0	0	0	0	0	0	0	0	13	17
PVP01_0320500	PVP01_0320500	PVP01_0320500.1	protein_coding	0	1	1	46	31	0	2	1	0	0	0	0	0	0	0	0	1	13
PVP01_0320600	PVP01_0320600	PVP01_0320600.1	protein_coding	0	4	13	23	10	0	0	13	0	0	0	0	0	0	0	0	4	13
PVP01_0320700	PVP01_0320700	PVP01_0320700.1	protein_coding	0	2	5	30	14	0	0	5	0	0	0	0	0	0	0	0	2	16
PVP01_0320800	PVP01_0320800	PVP01_0320800.1	protein_coding	0	9	5	47	35	0	0	5	0	0	0	0	0	0	0	0	9	12
PVP01_0320900	PVP01_0320900	PVP01_0320900.1	protein_coding	0	1	0	53	27	0	5	0	0	0	0	0	0	0	0	0	1	21
PVP01_0321000	PVP01_0321000	PVP01_0321000.1	protein_coding	0	8	9	44	27	0	1	9	0	0	0	0	0	0	0	0	8	16
PVP01_0321100	PVP01_0321100	PVP01_0321100.1	protein_coding	0	2	1	31	15	0	1	1	0	0	0	1	0	0	0	0	1	16
PVP01_0400100	PVP01_0400100	PVP01_0400100.1	protein_coding	0	0	0	7	7	0	0	0	0	0	0	0	0	0	0	0	0	0
PVP01_0400200	PVP01_0400200	PVP01_0400200.1	protein_coding	0	0	4	3	3	0	0	4	0	0	0	0	0	0	0	0	0	0
PVP01_0400300	PVP01_0400300	PVP01_0400300.1	protein_coding	0	0	0	8	1	0	0	0	0	0	0	0	0	0	0	0	0	7
PVP01_0400400	PVP01_0400400	PVP01_0400400.1	protein_coding	0	0	0	3	3	0	0	0	0	0	0	0	0	0	0	0	0	0
PVP01_0400500	PVP01_0400500	PVP01_0400500.1	protein_coding	0	0	0	3	0	0	0	0	0	0	0	0	0	0	0	0	0	3
PVP01_0400600	PVP01_0400600	PVP01_0400600.1	protein_coding	0	0	0	12	12	0	0	0	0	0	0	0	0	0	0	0	0	0
PVP01_0400700	PVP01_0400700	PVP01_0400700.1	protein_coding	1	1	5	10	5	0	5	5	0	0	0	1	0	0	1	0	1	0
PVP01_0400800	PVP01_0400800	PVP01_0400800.1	protein_coding	0	0	0	38	21	0	0	0	0	0	0	0	0	0	0	0	0	17
PVP01_0400900	PVP01_0400900	PVP01_0400900.1	protein_coding	0	2	15	8	2	0	0	15	0	0	0	0	0	0	0	0	2	6
PVP01_0401000	PVP01_0401000	PVP01_0401000.1	protein_coding	0	0	0	21	21	0	0	0	0	0	0	0	0	0	0	0	0	0
PVP01_0401400	PVP01_0401400	PVP01_0401400.1	protein_coding	0	0	0	5	0	0	0	0	0	0	0	0	0	0	0	0	0	5
PVP01_0401500	PVP01_0401500	PVP01_0401500.1	protein_coding	0	1	3	1	0	0	1	3	0	0	0	0	0	0	0	0	1	0
PVP01_0401600	PVP01_0401600	PVP01_0401600.1	protein_coding	0	0	0	10	5	0	0	0	0	0	0	0	0	0	0	0	0	5
PVP01_0401700	PVP01_0401700	PVP01_0401700.1	protein_coding	0	0	0	9	2	0	0	0	0	0	0	0	0	0	0	0	0	7
PVP01_0401800	PVP01_0401800	PVP01_0401800.1	protein_coding	0	0	0	5	4	0	0	0	0	0	0	0	0	0	0	0	0	1
PVP01_0401900	PVP01_0401900	PVP01_0401900.1	protein_coding	0	0	0	35	32	0	0	0	0	0	0	0	0	0	0	0	0	3
PVP01_0402000	PVP01_0402000	PVP01_0402000.1	protein_coding	0	1	4	35	30	0	4	4	0	0	0	1	0	0	0	0	0	2
PVP01_0402100	PVP01_0402100	PVP01_0402100.1	protein_coding	1	5	11	63	35	0	0	11	0	0	0	0	0	1	0	0	5	28
PVP01_0402200	PVP01_0402200	PVP01_0402200.1	protein_coding	0	2	7	84	51	0	9	7	0	0	0	1	0	0	0	0	1	25
PVP01_0402300	PVP01_0402300	PVP01_0402300.1	protein_coding	1	1	15	51	0	0	0	15	0	0	0	0	0	1	0	0	1	51
PVP01_0402400	PVP01_0402400	PVP01_0402400.1	protein_coding	0	0	0	30	13	0	0	0	0	0	0	0	0	0	0	0	0	17
PVP01_0402500	PVP01_0402500	PVP01_0402500.1	protein_coding	0	0	7	6	0	0	1	7	0	0	0	0	0	0	0	0	0	5
PVP01_0402600	PVP01_0402600	PVP01_0402600.1	protein_coding	0	0	0	9	8	0	0	0	0	0	0	0	0	0	0	0	0	1
PVP01_0402700	PVP01_0402700	PVP01_0402700.1	protein_coding	0	1	0	0	0	0	0	0	0	0	0	0	0	0	0	0	1	0
PVP01_0402800	PVP01_0402800	PVP01_0402800.1	protein_coding	0	0	0	11	10	0	0	0	0	0	0	0	0	0	0	0	0	1
PVP01_0402900	PVP01_0402900	PVP01_0402900.1	protein_coding	0	0	0	31	0	0	0	0	0	0	0	0	0	0	0	0	0	31
PVP01_0403000	PVP01_0403000	PVP01_0403000.1	protein_coding	0	0	0	47	28	0	0	0	0	0	0	0	0	0	0	0	0	19
PVP01_0403100	PVP01_0403100	PVP01_0403100.1	protein_coding	0	0	1	149	27	0	0	1	0	0	0	0	0	0	0	0	0	122
PVP01_0403200	PVP01_0403200	PVP01_0403200.1	protein_coding	0	20	37	171	32	0	9	37	0	0	0	1	0	0	0	0	19	131
PVP01_0403300	PVP01_0403300	PVP01_0403300.1	protein_coding	0	18	53	251	144	0	16	53	0	0	0	2	0	0	0	0	18	91
PVP01_0403400	PVP01_0403400	PVP01_0403400.1	protein_coding	0	5	12	226	102	0	0	12	0	0	0	0	0	0	0	0	5	124
PVP01_0403500	PVP01_0403500	PVP01_0403500.1	protein_coding	0	7	29	146	55	0	7	29	0	0	0	1	0	0	0	0	7	84
PVP01_0403600	PVP01_0403600	PVP01_0403600.1	protein_coding	0	2	3	142	81	0	2	3	0	0	0	1	0	0	0	0	1	60
PVP01_0403700	PVP01_0403700	PVP01_0403700.1	protein_coding	0	3	10	135	77	0	3	10	0	0	0	0	0	0	0	0	3	55
PVP01_0403800	PVP01_0403800	PVP01_0403800.1	protein_coding	0	5	5	247	153	0	7	5	0	0	0	1	0	0	0	0	4	88
PVP01_0403900	PVP01_0403900	PVP01_0403900.1	protein_coding	0	20	41	347	87	0	6	41	0	0	0	0	0	0	0	0	20	254
PVP01_0404000	PVP01_0404000	PVP01_0404000.1	protein_coding	0	22	74	484	200	0	15	74	0	0	0	3	0	0	0	0	21	270
PVP01_0404100	PVP01_0404100	PVP01_0404100.1	protein_coding	2	8	46	319	77	0	8	46	0	0	0	1	0	2	0	0	7	235
PVP01_0404200	PVP01_0404200	PVP01_0404200.1	protein_coding	0	1	3	175	48	0	0	3	0	0	0	0	0	0	0	0	1	127
PVP01_0404300	PVP01_0404300	PVP01_0404300.1	protein_coding	0	4	7	95	42	0	0	7	0	0	0	0	0	0	0	0	4	53
PVP01_0404400	PVP01_0404400	PVP01_0404400.1	protein_coding	0	2	2	83	54	0	0	2	0	0	0	0	0	0	0	0	2	29
PVP01_0404500	PVP01_0404500	PVP01_0404500.1	protein_coding	0	0	1	51	32	0	0	1	0	0	0	0	0	0	0	0	0	19
PVP01_0404600	PVP01_0404600	PVP01_0404600.1	protein_coding	0	0	8	123	13	0	0	8	0	0	0	0	0	0	0	0	0	110
PVP01_0404700	PVP01_0404700	PVP01_0404700.1	protein_coding	1	22	50	61	45	0	0	50	0	0	0	0	0	1	0	0	22	16
PVP01_0404800	PVP01_0404800	PVP01_0404800.1	protein_coding	0	1	0	130	112	0	0	0	0	0	0	0	0	0	0	0	1	18
PVP01_0404900	PVP01_0404900	PVP01_0404900.1	protein_coding	0	1	3	50	19	0	0	3	0	0	0	0	0	0	0	0	1	31
PVP01_0405000	PVP01_0405000	PVP01_0405000.1	protein_coding	0	32	33	43	26	0	1	33	0	0	0	1	0	0	0	0	31	17
PVP01_0405100	PVP01_0405100	PVP01_0405100.1	protein_coding	0	1	0	41	17	0	1	0	0	0	0	0	0	0	0	0	1	23
PVP01_0405200	PVP01_0405200	PVP01_0405200.1	protein_coding	0	1	2	40	18	0	1	2	0	0	0	1	0	0	0	0	0	22
PVP01_0405300	PVP01_0405300	PVP01_0405300.1	protein_coding	0	0	3	28	7	0	1	3	0	0	0	0	0	0	0	0	0	20
PVP01_0405400	PVP01_0405400	PVP01_0405400.1	protein_coding	0	0	2	33	15	0	0	2	0	0	0	0	0	0	0	0	0	18
PVP01_0405500	PVP01_0405500	PVP01_0405500.1	protein_coding	0	0	2	24	13	0	2	2	0	0	0	0	0	0	0	0	0	9
PVP01_0405600	PVP01_0405600	PVP01_0405600.1	protein_coding	0	0	0	28	11	0	2	0	0	0	0	0	0	0	0	0	0	15
PVP01_0405700	PVP01_0405700	PVP01_0405700.1	protein_coding	0	1	0	30	15	0	0	0	0	0	0	0	0	0	0	0	1	15
PVP01_0405800	PVP01_0405800	PVP01_0405800.1	protein_coding	0	0	0	29	14	0	1	0	0	0	0	0	0	0	0	0	0	14
PVP01_0405900	PVP01_0405900	PVP01_0405900.1	protein_coding	0	6	2	22	12	0	0	2	0	0	0	0	0	0	0	0	6	10
PVP01_0406000	PVP01_0406000	PVP01_0406000.1	snoRNA	0	0	0	26	12	0	0	0	0	0	0	0	0	0	0	0	0	14
PVP01_0406100	PVP01_0406100	PVP01_0406100.1	lincRNA	0	0	0	28	14	0	0	0	0	0	0	0	0	0	0	0	0	14
PVP01_0406200	PVP01_0406200	PVP01_0406200.1	lincRNA	0	0	0	32	18	0	0	0	0	0	0	0	0	0	0	0	0	14
PVP01_0406300	PVP01_0406300	PVP01_0406300.1	protein_coding	0	2	0	49	38	0	0	0	0	0	0	0	0	0	0	0	2	11
PVP01_0406400	PVP01_0406400	PVP01_0406400.1	protein_coding	0	13	23	36	18	0	0	23	0	0	0	0	0	0	0	0	13	18
PVP01_0406500	PVP01_0406500	PVP01_0406500.1	protein_coding	0	1	0	47	25	0	0	0	0	0	0	0	0	0	0	0	1	22
PVP01_0406600	PVP01_0406600	PVP01_0406600.1	protein_coding	0	2	4	33	15	0	0	4	0	0	0	0	0	0	0	0	2	18
PVP01_0406700	PVP01_0406700	PVP01_0406700.1	protein_coding	0	0	1	29	7	0	1	1	0	0	0	0	0	0	0	0	0	21
PVP01_0406800	PVP01_0406800	PVP01_0406800.1	protein_coding	0	1	3	31	17	0	0	3	0	0	0	0	0	0	0	0	1	14
PVP01_0406900	PVP01_0406900	PVP01_0406900.1	protein_coding	0	1	5	29	8	0	1	5	0	0	0	0	0	0	0	0	1	20
PVP01_0407000	PVP01_0407000	PVP01_0407000.1	protein_coding	0	2	0	34	14	0	0	0	0	0	0	0	0	0	0	0	2	20
PVP01_0407100	PVP01_0407100	PVP01_0407100.1	protein_coding	0	4	1	41	18	0	0	1	0	0	0	0	0	0	0	0	4	23
PVP01_0407200	PVP01_0407200	PVP01_0407200.1	protein_coding	0	0	0	40	20	0	0	0	0	0	0	0	0	0	0	0	0	20
PVP01_0407300	PVP01_0407300	PVP01_0407300.1	protein_coding	0	2	0	39	14	0	2	0	0	0	0	0	0	0	0	0	2	23
PVP01_0407400	PVP01_0407400	PVP01_0407400.1	protein_coding	0	5	3	42	19	0	4	3	0	0	0	0	0	0	0	0	5	19
PVP01_0407500	PVP01_0407500	PVP01_0407500.1	protein_coding	0	5	1	25	12	0	4	1	0	0	0	1	0	0	0	0	4	10
PVP01_0407600	PVP01_0407600	PVP01_0407600.1	protein_coding	0	0	0	35	17	0	0	0	0	0	0	0	0	0	0	0	0	18
PVP01_0407700	PVP01_0407700	PVP01_0407700.1	protein_coding	0	1	0	29	18	0	1	0	0	0	0	0	0	0	0	0	1	10
PVP01_0407800	PVP01_0407800	PVP01_0407800.1	protein_coding	0	3	6	31	18	0	0	6	0	0	0	0	0	0	0	0	3	13
PVP01_0407900	PVP01_0407900	PVP01_0407900.1	protein_coding	0	1	0	38	13	0	0	0	0	0	0	0	0	0	0	0	1	25
PVP01_0408000	PVP01_0408000	PVP01_0408000.1	protein_coding	0	4	5	29	12	0	6	5	0	0	0	1	0	0	0	0	4	11
PVP01_0408100	PVP01_0408100	PVP01_0408100.1	protein_coding	0	0	4	36	24	0	0	4	0	0	0	0	0	0	0	0	0	12
PVP01_0408200	PVP01_0408200	PVP01_0408200.1	protein_coding	0	0	0	43	25	0	0	0	0	0	0	0	0	0	0	0	0	18
PVP01_0408300	PVP01_0408300	PVP01_0408300.1	protein_coding	0	10	14	55	13	0	5	14	0	0	0	0	0	0	0	0	10	37
PVP01_0408400	PVP01_0408400	PVP01_0408400.1	protein_coding	0	9	14	38	20	0	0	14	0	0	0	0	0	0	0	0	9	18
PVP01_0408500	PVP01_0408500	PVP01_0408500.1	protein_coding	0	3	5	44	35	0	0	5	0	0	0	0	0	0	0	0	3	9
PVP01_0408600	PVP01_0408600	PVP01_0408600.1	protein_coding	0	1	1	17	9	0	0	1	0	0	0	0	0	0	0	0	1	8
PVP01_0408700	PVP01_0408700	PVP01_0408700.1	protein_coding	0	1	4	21	6	0	0	4	0	0	0	0	0	0	0	0	1	15
PVP01_0408800	PVP01_0408800	PVP01_0408800.1	protein_coding	0	1	0	33	24	0	1	0	0	0	0	0	0	0	0	0	1	8
PVP01_0408900	PVP01_0408900	PVP01_0408900.1	protein_coding	0	3	7	27	14	0	4	7	0	0	0	0	0	0	0	0	3	9
PVP01_0409000	PVP01_0409000	PVP01_0409000.1	protein_coding	0	7	7	38	19	0	0	7	0	0	0	0	0	0	0	0	7	19
PVP01_0409100	PVP01_0409100	PVP01_0409100.1	protein_coding	0	1	1	36	14	0	8	1	0	0	0	0	0	0	0	0	1	14
PVP01_0409200	PVP01_0409200	PVP01_0409200.1	protein_coding	0	5	6	22	3	0	0	6	0	0	0	0	0	0	0	0	5	19
PVP01_0409300	PVP01_0409300	PVP01_0409300.1	protein_coding	0	1	0	33	17	0	0	0	0	0	0	0	0	0	0	0	1	16
PVP01_0409400	PVP01_0409400	PVP01_0409400.1	protein_coding	0	1	3	20	16	0	0	3	0	0	0	0	0	0	0	0	1	4
PVP01_0409500	PVP01_0409500	PVP01_0409500.1	protein_coding	0	4	1	23	11	0	0	1	0	0	0	0	0	0	0	0	4	12
PVP01_0409600	PVP01_0409600	PVP01_0409600.1	protein_coding	0	3	0	26	10	0	0	0	0	0	0	0	0	0	0	0	3	16
PVP01_0409700	PVP01_0409700	PVP01_0409700.1	protein_coding	0	1	0	22	12	0	0	0	0	0	0	0	0	0	0	0	1	10
PVP01_0409800	PVP01_0409800	PVP01_0409800.1	protein_coding	0	2	0	66	51	0	2	0	0	0	0	0	0	0	0	0	2	13
PVP01_0409900	PVP01_0409900	PVP01_0409900.1	protein_coding	0	16	26	24	10	0	0	26	0	0	0	0	0	0	0	0	16	14
PVP01_0410000	PVP01_0410000	PVP01_0410000.1	protein_coding	0	1	7	66	52	0	3	7	0	0	0	0	0	0	0	0	1	11
PVP01_0410100	PVP01_0410100	PVP01_0410100.1	protein_coding	0	1	6	24	16	0	0	6	0	0	0	0	0	0	0	0	1	8
PVP01_0410200	PVP01_0410200	PVP01_0410200.1	protein_coding	0	1	1	25	14	0	2	1	0	0	0	1	0	0	0	0	0	10
PVP01_0410300	PVP01_0410300	PVP01_0410300.1	protein_coding	0	2	13	12	6	0	0	13	0	0	0	0	0	0	0	0	2	6
PVP01_0410400	PVP01_0410400	PVP01_0410400.1	protein_coding	0	0	0	26	11	0	0	0	0	0	0	0	0	0	0	0	0	15
PVP01_0410500	PVP01_0410500	PVP01_0410500.1	protein_coding	0	1	2	30	22	0	1	2	0	0	0	0	0	0	0	0	1	7
PVP01_0410600	PVP01_0410600	PVP01_0410600.1	protein_coding	0	7	10	32	11	0	0	10	0	0	0	0	0	0	0	0	7	21
PVP01_0410700	PVP01_0410700	PVP01_0410700.1	protein_coding	0	1	0	40	19	0	0	0	0	0	0	0	0	0	0	0	1	21
PVP01_0410800	PVP01_0410800	PVP01_0410800.1	protein_coding	0	4	5	47	20	0	4	5	0	0	0	0	0	0	0	0	4	23
PVP01_0410900	PVP01_0410900	PVP01_0410900.1	protein_coding	0	1	1	57	13	0	1	1	0	0	0	0	0	0	0	0	1	43
PVP01_0411000	PVP01_0411000	PVP01_0411000.1	protein_coding	0	6	23	31	10	0	0	23	0	0	0	0	0	0	0	0	6	21
PVP01_0411100	PVP01_0411100	PVP01_0411100.1	protein_coding	0	0	4	58	42	0	0	4	0	0	0	0	0	0	0	0	0	16
PVP01_0411200	PVP01_0411200	PVP01_0411200.1	protein_coding	0	1	0	46	28	0	1	0	0	0	0	0	0	0	0	0	1	17
PVP01_0411300	PVP01_0411300	PVP01_0411300.1	protein_coding	1	12	11	39	8	0	24	11	0	0	1	2	0	0	0	0	10	10
PVP01_0411400	PVP01_0411400	PVP01_0411400.1	protein_coding	0	2	3	44	12	0	1	3	0	0	0	0	0	0	0	0	2	31
PVP01_0411500	PVP01_0411500	PVP01_0411500.1	protein_coding	0	0	0	42	27	0	1	0	0	0	0	0	0	0	0	0	0	14
PVP01_0411600	PVP01_0411600	PVP01_0411600.1	protein_coding	0	0	1	25	16	0	2	1	0	0	0	0	0	0	0	0	0	7
PVP01_0411700	PVP01_0411700	PVP01_0411700.1	protein_coding	0	0	0	28	15	0	2	0	0	0	0	0	0	0	0	0	0	11
PVP01_0411800	PVP01_0411800	PVP01_0411800.1	protein_coding	0	0	0	26	12	0	3	0	0	0	0	0	0	0	0	0	0	11
PVP01_0411900	PVP01_0411900	PVP01_0411900.1	protein_coding	0	1	0	27	15	0	0	0	0	0	0	0	0	0	0	0	1	12
PVP01_0412000	PVP01_0412000	PVP01_0412000.1	protein_coding	0	0	0	28	14	0	0	0	0	0	0	0	0	0	0	0	0	14
PVP01_0412100	PVP01_0412100	PVP01_0412100.1	protein_coding	0	1	6	24	11	0	1	6	0	0	0	0	0	0	0	0	1	12
PVP01_0412200	PVP01_0412200	PVP01_0412200.1	protein_coding	0	1	1	26	12	0	0	1	0	0	0	0	0	0	0	0	1	14
PVP01_0412300	PVP01_0412300	PVP01_0412300.1	protein_coding	0	1	1	21	12	0	1	1	0	0	0	0	0	0	0	0	1	8
PVP01_0412400	PVP01_0412400	PVP01_0412400.1	protein_coding	0	16	23	30	10	0	0	23	0	0	0	0	0	0	0	0	16	20
PVP01_0412500	PVP01_0412500	PVP01_0412500.1	protein_coding	0	20	14	43	22	0	0	14	0	0	0	0	0	0	0	0	20	21
PVP01_0412600	PVP01_0412600	PVP01_0412600.1	protein_coding	0	1	0	42	17	0	0	0	0	0	0	0	0	0	0	0	1	25
PVP01_0412700	PVP01_0412700	PVP01_0412700.1	protein_coding	0	0	1	37	13	0	5	1	0	0	0	0	0	0	0	0	0	19
PVP01_0412800	PVP01_0412800	PVP01_0412800.1	protein_coding	1	2	10	38	24	0	0	10	0	0	0	0	0	1	0	0	2	14
PVP01_0412900	PVP01_0412900	PVP01_0412900.1	protein_coding	0	1	2	24	12	0	1	2	0	0	0	0	0	0	0	0	1	11
PVP01_0413000	PVP01_0413000	PVP01_0413000.1	protein_coding	0	0	2	23	8	0	0	2	0	0	0	0	0	0	0	0	0	15
PVP01_0413100	PVP01_0413100	PVP01_0413100.1	protein_coding	0	6	1	13	10	0	0	1	0	0	0	0	0	0	0	0	6	3
PVP01_0413200	PVP01_0413200	PVP01_0413200.1	protein_coding	0	2	1	20	9	0	0	1	0	0	0	0	0	0	0	0	2	11
PVP01_0413300	PVP01_0413300	PVP01_0413300.1	protein_coding	0	0	0	16	5	0	0	0	0	0	0	0	0	0	0	0	0	11
PVP01_0413400	PVP01_0413400	PVP01_0413400.1	protein_coding	0	1	2	12	4	0	3	2	0	0	0	0	0	0	0	0	1	5
PVP01_0413500	PVP01_0413500	PVP01_0413500.1	protein_coding	0	1	1	21	11	0	0	1	0	0	0	0	0	0	0	0	1	10
PVP01_0413600	PVP01_0413600	PVP01_0413600.1	protein_coding	0	1	2	14	7	0	3	2	0	0	0	1	0	0	0	0	1	4
PVP01_0413700	PVP01_0413700	PVP01_0413700.1	protein_coding	0	1	0	16	3	0	3	0	0	0	0	0	0	0	0	0	1	10
PVP01_0413800	PVP01_0413800	PVP01_0413800.1	protein_coding	0	0	0	18	7	0	0	0	0	0	0	0	0	0	0	0	0	11
PVP01_0413900	PVP01_0413900	PVP01_0413900.1	protein_coding	0	2	1	20	8	0	0	1	0	0	0	0	0	0	0	0	2	12
PVP01_0414000	PVP01_0414000	PVP01_0414000.1	protein_coding	0	0	0	15	6	0	0	0	0	0	0	0	0	0	0	0	0	9
PVP01_0414100	PVP01_0414100	PVP01_0414100.1	protein_coding	0	0	2	14	10	0	0	2	0	0	0	0	0	0	0	0	0	4
PVP01_0414200	PVP01_0414200	PVP01_0414200.1	protein_coding	0	0	1	19	9	0	0	1	0	0	0	0	0	0	0	0	0	10
PVP01_0414300	PVP01_0414300	PVP01_0414300.1	protein_coding	0	1	0	23	11	0	2	0	0	0	0	0	0	0	0	0	1	10
PVP01_0414400	PVP01_0414400	PVP01_0414400.1	protein_coding	0	2	4	18	10	0	0	4	0	0	0	0	0	0	0	0	2	8
PVP01_0414500	PVP01_0414500	PVP01_0414500.1	protein_coding	0	0	0	20	11	0	2	0	0	0	0	0	0	0	0	0	0	7
PVP01_0414600	PVP01_0414600	PVP01_0414600.1	protein_coding	0	0	1	18	9	0	0	1	0	0	0	0	0	0	0	0	0	9
PVP01_0414700	PVP01_0414700	PVP01_0414700.1	protein_coding	0	4	8	18	10	0	0	8	0	0	0	0	0	0	0	0	4	8
PVP01_0414800	PVP01_0414800	PVP01_0414800.1	protein_coding	0	0	0	25	9	0	1	0	0	0	0	0	0	0	0	0	0	15
PVP01_0414900	PVP01_0414900	PVP01_0414900.1	protein_coding	0	0	0	33	6	0	0	0	0	0	0	0	0	0	0	0	0	27
PVP01_0415000	PVP01_0415000	PVP01_0415000.1	protein_coding	0	2	0	49	23	0	2	0	0	0	0	0	0	0	0	0	2	24
PVP01_0415100	PVP01_0415100	PVP01_0415100.1	protein_coding	0	7	5	46	23	0	0	5	0	0	0	0	0	0	0	0	7	23
PVP01_0415200	PVP01_0415200	PVP01_0415200.1	protein_coding	0	3	3	55	16	0	16	3	0	0	0	0	0	0	0	0	3	23
PVP01_0415300	PVP01_0415300	PVP01_0415300.1	protein_coding	0	1	2	43	15	0	0	2	0	0	0	0	0	0	0	0	1	28
PVP01_0415400	PVP01_0415400	PVP01_0415400.1	protein_coding	0	0	2	39	10	0	5	2	0	0	0	0	0	0	0	0	0	24
PVP01_0415500	PVP01_0415500	PVP01_0415500.1	protein_coding	0	2	0	23	14	0	2	0	0	0	0	0	0	0	0	0	2	7
PVP01_0415600	PVP01_0415600	PVP01_0415600.1	protein_coding	0	1	0	28	14	0	0	0	0	0	0	0	0	0	0	0	1	14
PVP01_0415700	PVP01_0415700	PVP01_0415700.1	protein_coding	0	1	3	20	10	0	3	3	0	0	0	0	0	0	0	0	1	7
PVP01_0415800	PVP01_0415800	PVP01_0415800.1	protein_coding	0	9	11	29	12	0	0	11	0	0	0	0	0	0	0	0	9	17
PVP01_0415900	PVP01_0415900	PVP01_0415900.1	protein_coding	0	8	12	32	16	0	0	12	0	0	0	0	0	0	0	0	8	16
PVP01_0416000	PVP01_0416000	PVP01_0416000.1	protein_coding	0	2	0	39	21	0	0	0	0	0	0	0	0	0	0	0	2	18
PVP01_0416100	PVP01_0416100	PVP01_0416100.1	protein_coding	0	0	0	44	27	0	1	0	0	0	0	0	0	0	0	0	0	16
PVP01_0416200	PVP01_0416200	PVP01_0416200.1	protein_coding	0	3	4	35	22	0	0	4	0	0	0	0	0	0	0	0	3	13
PVP01_0416300	PVP01_0416300	PVP01_0416300.1	protein_coding	0	0	0	32	19	0	0	0	0	0	0	0	0	0	0	0	0	13
PVP01_0416400	PVP01_0416400	PVP01_0416400.1	protein_coding	0	19	24	43	30	0	0	24	0	0	0	0	0	0	0	0	19	13
PVP01_0416500	PVP01_0416500	PVP01_0416500.1	protein_coding	0	9	12	71	46	0	0	12	0	0	0	0	0	0	0	0	9	25
PVP01_0416600	PVP01_0416600	PVP01_0416600.1	protein_coding	0	0	0	48	19	0	0	0	0	0	0	0	0	0	0	0	0	29
PVP01_0416700	PVP01_0416700	PVP01_0416700.1	protein_coding	0	10	5	36	17	0	9	5	0	0	0	1	0	0	0	0	9	11
PVP01_0416800	PVP01_0416800	PVP01_0416800.1	protein_coding	0	4	4	77	62	0	1	4	0	0	0	0	0	0	0	0	4	14
PVP01_0416900	PVP01_0416900	PVP01_0416900.1	protein_coding	0	27	25	187	168	0	0	25	0	0	0	0	0	0	0	0	27	19
PVP01_0417000	PVP01_0417000	PVP01_0417000.1	protein_coding	0	70	33	290	162	0	42	33	0	0	0	2	0	0	0	0	68	88
PVP01_0417100	PVP01_0417100	PVP01_0417100.1	protein_coding	1	46	53	341	134	0	16	53	0	0	0	3	0	1	0	0	44	193
PVP01_0417200	PVP01_0417200	PVP01_0417200.1	protein_coding	0	54	36	320	162	0	24	36	0	0	0	1	0	0	0	0	53	135
PVP01_0417300	PVP01_0417300	PVP01_0417300.1	protein_coding	1	36	39	326	129	0	22	39	0	0	0	3	0	1	0	0	33	178
PVP01_0417400	PVP01_0417400	PVP01_0417400.1	protein_coding	1	47	47	219	104	0	4	47	0	0	0	0	0	0	1	0	47	111
PVP01_0417500	PVP01_0417500	PVP01_0417500.1	protein_coding	0	7	4	267	151	0	0	4	0	0	0	0	0	0	0	0	7	116
PVP01_0417600	PVP01_0417600	PVP01_0417600.1	protein_coding	0	35	60	191	87	0	9	60	0	0	0	2	0	0	0	0	34	96
PVP01_0417700	PVP01_0417700	PVP01_0417700.1	protein_coding	0	40	30	135	13	0	13	30	0	0	0	0	0	0	0	0	40	109
PVP01_0417800	PVP01_0417800	PVP01_0417800.1	protein_coding	0	2	0	109	20	0	3	0	0	0	0	0	0	0	0	0	2	86
PVP01_0417900	PVP01_0417900	PVP01_0417900.1	protein_coding	1	1	7	35	17	0	8	7	0	0	0	0	0	1	0	0	1	10
PVP01_0418000	PVP01_0418000	PVP01_0418000.1	protein_coding	0	3	7	40	20	0	2	7	0	0	0	0	0	0	0	0	3	18
PVP01_0418100	PVP01_0418100	PVP01_0418100.1	protein_coding	0	0	0	38	20	0	0	0	0	0	0	0	0	0	0	0	0	18
PVP01_0418200	PVP01_0418200	PVP01_0418200.1	protein_coding	0	2	6	35	25	0	2	6	0	0	0	0	0	0	0	0	2	8
PVP01_0418300	PVP01_0418300	PVP01_0418300.1	protein_coding	1	1	0	70	63	0	0	0	0	0	0	0	1	0	0	0	1	7
PVP01_0418400	PVP01_0418400	PVP01_0418400.1	protein_coding	0	3	40	29	18	0	2	40	0	0	0	0	0	0	0	0	3	9
PVP01_0418500	PVP01_0418500	PVP01_0418500.1	protein_coding	0	2	4	71	58	0	0	4	0	0	0	0	0	0	0	0	2	13
PVP01_0418600	PVP01_0418600	PVP01_0418600.1	protein_coding	0	0	0	79	16	0	1	0	0	0	0	0	0	0	0	0	0	62
PVP01_0418700	PVP01_0418700	PVP01_0418700.1	protein_coding	0	2	9	28	15	0	0	9	0	0	0	0	0	0	0	0	2	13
PVP01_0418800	PVP01_0418800	PVP01_0418800.1	protein_coding	0	4	14	22	15	0	0	14	0	0	0	0	0	0	0	0	4	7
PVP01_0418900	PVP01_0418900	PVP01_0418900.1	protein_coding	0	0	2	24	13	0	0	2	0	0	0	0	0	0	0	0	0	11
PVP01_0419000	PVP01_0419000	PVP01_0419000.1	protein_coding	0	1	1	19	5	0	5	1	0	0	0	0	0	0	0	0	1	9
PVP01_0419100	PVP01_0419100	PVP01_0419100.1	protein_coding	0	7	2	22	14	0	0	2	0	0	0	0	0	0	0	0	7	8
PVP01_0419200	PVP01_0419200	PVP01_0419200.1	protein_coding	0	0	2	33	17	0	1	2	0	0	0	0	0	0	0	0	0	15
PVP01_0419300	PVP01_0419300	PVP01_0419300.1	protein_coding	0	0	0	23	16	0	1	0	0	0	0	0	0	0	0	0	0	6
PVP01_0419400	PVP01_0419400	PVP01_0419400.1	protein_coding	0	3	4	16	7	0	1	4	0	0	0	0	0	0	0	0	3	8
PVP01_0419500	PVP01_0419500	PVP01_0419500.1	protein_coding	1	3	2	22	12	0	0	2	0	0	0	0	0	1	0	0	3	10
PVP01_0419600	PVP01_0419600	PVP01_0419600.1	protein_coding	0	0	1	31	19	0	4	1	0	0	0	0	0	0	0	0	0	8
PVP01_0419700	PVP01_0419700	PVP01_0419700.1	protein_coding	0	3	0	41	11	0	0	0	0	0	0	0	0	0	0	0	3	30
PVP01_0419800	PVP01_0419800	PVP01_0419800.1	protein_coding	0	11	9	41	11	0	6	9	0	0	0	0	0	0	0	0	11	24
PVP01_0419900	PVP01_0419900	PVP01_0419900.1	protein_coding	0	2	1	58	23	0	5	1	0	0	0	0	0	0	0	0	2	30
PVP01_0420000	PVP01_0420000	PVP01_0420000.1	protein_coding	0	2	5	59	21	0	1	5	0	0	0	0	0	0	0	0	2	37
PVP01_0420100	PVP01_0420100	PVP01_0420100.1	protein_coding	0	2	8	48	25	0	0	8	0	0	0	0	0	0	0	0	2	23
PVP01_0420200	PVP01_0420200	PVP01_0420200.1	protein_coding	0	0	4	48	21	0	1	4	0	0	0	0	0	0	0	0	0	26
PVP01_0420300	PVP01_0420300	PVP01_0420300.1	protein_coding	0	4	2	64	43	0	0	2	0	0	0	0	0	0	0	0	4	21
PVP01_0420400	PVP01_0420400	PVP01_0420400.1	protein_coding	2	11	10	49	21	0	0	10	0	0	0	0	0	2	0	0	11	28
PVP01_0420500	PVP01_0420500	PVP01_0420500.1	protein_coding	0	1	5	56	12	0	0	5	0	0	0	0	0	0	0	0	1	44
PVP01_0420600	PVP01_0420600	PVP01_0420600.1	protein_coding	0	2	0	24	13	0	0	0	0	0	0	0	0	0	0	0	2	11
PVP01_0420700	PVP01_0420700	PVP01_0420700.1	protein_coding	0	0	0	34	18	0	1	0	0	0	0	0	0	0	0	0	0	15
PVP01_0420800	PVP01_0420800	PVP01_0420800.1	protein_coding	0	4	2	33	21	0	0	2	0	0	0	0	0	0	0	0	4	12
PVP01_0420900	PVP01_0420900	PVP01_0420900.1	protein_coding	0	3	1	46	13	0	8	1	0	0	0	1	0	0	0	0	2	26
PVP01_0421000	PVP01_0421000	PVP01_0421000.1	protein_coding	0	23	16	50	20	0	0	16	0	0	0	0	0	0	0	0	23	30
PVP01_0421100	PVP01_0421100	PVP01_0421100.1	protein_coding	0	3	5	50	25	0	2	5	0	0	0	0	0	0	0	0	3	23
PVP01_0421200	PVP01_0421200	PVP01_0421200.1	protein_coding	0	2	2	35	16	0	0	2	0	0	0	0	0	0	0	0	2	19
PVP01_0421300	PVP01_0421300	PVP01_0421300.1	protein_coding	0	0	3	43	14	0	4	3	0	0	0	0	0	0	0	0	0	25
PVP01_0421400	PVP01_0421400	PVP01_0421400.1	protein_coding	0	1	0	29	20	0	1	0	0	0	0	0	0	0	0	0	1	8
PVP01_0421500	PVP01_0421500	PVP01_0421500.1	protein_coding	0	5	2	27	10	0	0	2	0	0	0	0	0	0	0	0	5	17
PVP01_0421600	PVP01_0421600	PVP01_0421600.1	protein_coding	0	1	0	31	19	0	0	0	0	0	0	0	0	0	0	0	1	12
PVP01_0421700	PVP01_0421700	PVP01_0421700.1	protein_coding	0	1	1	27	7	0	0	1	0	0	0	0	0	0	0	0	1	20
PVP01_0421800	PVP01_0421800	PVP01_0421800.1	protein_coding	0	0	0	23	17	0	0	0	0	0	0	0	0	0	0	0	0	6
PVP01_0421900	PVP01_0421900	PVP01_0421900.1	protein_coding	0	0	0	20	7	0	0	0	0	0	0	0	0	0	0	0	0	13
PVP01_0422000	PVP01_0422000	PVP01_0422000.1	protein_coding	0	6	7	19	12	0	0	7	0	0	0	0	0	0	0	0	6	7
PVP01_0422100	PVP01_0422100	PVP01_0422100.1	protein_coding	0	4	7	27	10	0	0	7	0	0	0	0	0	0	0	0	4	17
PVP01_0422200	PVP01_0422200	PVP01_0422200.1	protein_coding	0	1	0	28	12	0	7	0	0	0	0	0	0	0	0	0	1	9
PVP01_0422300	PVP01_0422300	PVP01_0422300.1	protein_coding	0	0	0	27	14	0	1	0	0	0	0	0	0	0	0	0	0	12
PVP01_0422400	PVP01_0422400	PVP01_0422400.1	protein_coding	0	0	4	28	10	0	0	4	0	0	0	0	0	0	0	0	0	18
PVP01_0422500	PVP01_0422500	PVP01_0422500.1	protein_coding	0	2	12	35	26	0	0	12	0	0	0	0	0	0	0	0	2	9
PVP01_0422600	PVP01_0422600	PVP01_0422600.1	protein_coding	0	1	3	37	19	0	0	3	0	0	0	0	0	0	0	0	1	18
PVP01_0422700	PVP01_0422700	PVP01_0422700.1	protein_coding	0	2	7	25	18	0	0	7	0	0	0	0	0	0	0	0	2	7
PVP01_0422800	PVP01_0422800	PVP01_0422800.1	protein_coding	0	8	6	32	17	0	3	6	0	0	0	0	0	0	0	0	8	12
PVP01_0422900	PVP01_0422900	PVP01_0422900.1	protein_coding	0	2	3	32	20	0	2	3	0	0	0	0	0	0	0	0	2	10
PVP01_0423000	PVP01_0423000	PVP01_0423000.1	protein_coding	0	0	6	37	26	0	1	6	0	0	0	0	0	0	0	0	0	10
PVP01_0423100	PVP01_0423100	PVP01_0423100.1	protein_coding	0	4	2	46	19	0	0	2	0	0	0	0	0	0	0	0	4	27
PVP01_0423200	PVP01_0423200	PVP01_0423200.1	protein_coding	0	0	8	30	13	0	0	8	0	0	0	0	0	0	0	0	0	17
PVP01_0423300	PVP01_0423300	PVP01_0423300.1	protein_coding	0	0	0	36	13	0	1	0	0	0	0	0	0	0	0	0	0	22
PVP01_0423400	PVP01_0423400	PVP01_0423400.1	protein_coding	0	5	13	22	11	0	0	13	0	0	0	0	0	0	0	0	5	11
PVP01_0423500	PVP01_0423500	PVP01_0423500.1	protein_coding	0	0	2	24	11	0	1	2	0	0	0	0	0	0	0	0	0	12
PVP01_0423600	PVP01_0423600	PVP01_0423600.1	protein_coding	0	0	1	113	14	0	0	1	0	0	0	0	0	0	0	0	0	99
PVP01_0423700	PVP01_0423700	PVP01_0423700.1	protein_coding	1	16	72	206	164	0	7	72	0	0	0	0	0	1	0	0	16	35
PVP01_0423800	PVP01_0423800	PVP01_0423800.1	protein_coding	0	14	64	232	21	0	2	64	0	0	0	1	0	0	0	0	14	209
PVP01_0423900	PVP01_0423900	PVP01_0423900.1	protein_coding	0	2	4	159	87	0	0	4	0	0	0	0	0	0	0	0	2	72
PVP01_0424000	PVP01_0424000	PVP01_0424000.1	protein_coding	3	14	59	314	264	0	11	59	0	0	2	2	0	1	0	0	14	41
PVP01_0424100	PVP01_0424100	PVP01_0424100.1	protein_coding	0	30	103	348	216	0	22	103	0	0	0	3	0	0	0	0	28	112
PVP01_0424200	PVP01_0424200	PVP01_0424200.1	protein_coding	0	4	2	350	125	0	4	2	0	0	0	1	0	0	0	0	3	222
PVP01_0424300	PVP01_0424300	PVP01_0424300.1	protein_coding	0	6	11	234	127	0	10	11	0	0	0	1	0	0	0	0	5	98
PVP01_0424400	PVP01_0424400	PVP01_0424400.1	protein_coding	0	0	0	123	98	0	1	0	0	0	0	0	0	0	0	0	0	24
PVP01_0424500	PVP01_0424500	PVP01_0424500.1	protein_coding	3	4	3	139	0	0	5	3	0	0	1	1	1	1	0	0	3	136
PVP01_0500300	PVP01_0500300	PVP01_0500300.1	protein_coding	0	0	0	13	0	0	0	0	0	0	0	0	0	0	0	0	0	13
PVP01_0500400	PVP01_0500400	PVP01_0500400.1	protein_coding	0	1	9	26	20	0	0	9	0	0	0	0	0	0	0	0	1	6
PVP01_0500500	PVP01_0500500	PVP01_0500500.1	protein_coding	0	0	0	65	43	0	0	0	0	0	0	0	0	0	0	0	0	22
PVP01_0500600	PVP01_0500600	PVP01_0500600.1	protein_coding	0	0	2	47	30	0	0	2	0	0	0	0	0	0	0	0	0	17
PVP01_0500700	PVP01_0500700	PVP01_0500700.1	protein_coding	0	0	0	44	1	0	0	0	0	0	0	0	0	0	0	0	0	43
PVP01_0500800	PVP01_0500800	PVP01_0500800.1	protein_coding	0	0	1	65	37	0	0	1	0	0	0	0	0	0	0	0	0	28
PVP01_0500900	PVP01_0500900	PVP01_0500900.1	protein_coding	1	5	19	87	84	0	2	19	0	0	0	0	0	1	0	0	5	1
PVP01_0501000	PVP01_0501000	PVP01_0501000.1	protein_coding	0	6	25	93	39	0	5	25	0	0	0	0	0	0	0	0	6	49
PVP01_0501100	PVP01_0501100	PVP01_0501100.1	protein_coding	1	3	12	98	82	0	1	12	0	0	0	0	1	0	0	0	3	15
PVP01_0501200	PVP01_0501200	PVP01_0501200.1	protein_coding	0	0	0	14	0	0	0	0	0	0	0	0	0	0	0	0	0	14
PVP01_0501300	PVP01_0501300	PVP01_0501300.1	protein_coding	0	0	0	14	10	0	0	0	0	0	0	0	0	0	0	0	0	4
PVP01_0501400	PVP01_0501400	PVP01_0501400.1	protein_coding	1	0	1	26	23	0	1	1	0	1	0	0	0	0	0	0	0	3
PVP01_0501500	PVP01_0501500	PVP01_0501500.1	protein_coding	0	0	0	52	25	0	0	0	0	0	0	0	0	0	0	0	0	27
PVP01_0501600	PVP01_0501600	PVP01_0501600.1	protein_coding	0	6	6	51	23	0	0	6	0	0	0	0	0	0	0	0	6	28
PVP01_0501700	PVP01_0501700	PVP01_0501700.1	protein_coding	0	0	0	49	25	0	0	0	0	0	0	0	0	0	0	0	0	24
PVP01_0501800	PVP01_0501800	PVP01_0501800.1	protein_coding	0	2	2	23	17	0	0	2	0	0	0	0	0	0	0	0	2	6
PVP01_0501900	PVP01_0501900	PVP01_0501900.1	protein_coding	0	0	0	12	12	0	0	0	0	0	0	0	0	0	0	0	0	0
PVP01_0502000	PVP01_0502000	PVP01_0502000.1	protein_coding	0	0	0	13	1	0	0	0	0	0	0	0	0	0	0	0	0	12
PVP01_0502100	PVP01_0502100	PVP01_0502100.1	protein_coding	0	2	0	23	23	0	1	0	0	0	0	1	0	0	0	0	1	0
PVP01_0502200	PVP01_0502200	PVP01_0502200.1	protein_coding	0	4	6	40	10	0	6	6	0	0	0	1	0	0	0	0	3	25
PVP01_0502300	PVP01_0502300	PVP01_0502300.1	protein_coding	1	0	0	54	21	0	0	0	0	0	0	0	0	1	0	0	0	33
PVP01_0502400	PVP01_0502400	PVP01_0502400.1	protein_coding	0	0	6	107	85	0	2	6	0	0	0	0	0	0	0	0	0	20
PVP01_0502500	PVP01_0502500	PVP01_0502500.1	protein_coding	0	2	8	120	28	0	11	8	0	0	0	0	0	0	0	0	2	81
PVP01_0502600	PVP01_0502600	PVP01_0502600.1	protein_coding	1	1	10	169	100	0	2	10	0	0	0	0	0	1	0	0	1	67
PVP01_0502700	PVP01_0502700	PVP01_0502700.1	protein_coding	0	6	12	313	95	0	7	12	0	0	0	1	0	0	0	0	5	212
PVP01_0502800	PVP01_0502800	PVP01_0502800.1	protein_coding	0	31	62	323	162	0	19	62	0	0	0	4	0	0	0	0	29	144
PVP01_0502900	PVP01_0502900	PVP01_0502900.1	protein_coding	0	17	30	315	144	0	11	30	0	0	0	0	0	0	0	0	17	160
PVP01_0503000	PVP01_0503000	PVP01_0503000.1	protein_coding	0	4	32	312	149	0	11	32	0	0	0	2	0	0	0	0	3	153
PVP01_0503100	PVP01_0503100	PVP01_0503100.1	protein_coding	0	3	6	314	148	0	6	6	0	0	0	2	0	0	0	0	3	160
PVP01_0503200	PVP01_0503200	PVP01_0503200.1	protein_coding	0	9	45	281	164	0	16	45	0	0	0	3	0	0	0	0	7	103
PVP01_0503300	PVP01_0503300	PVP01_0503300.1	protein_coding	1	29	69	178	131	0	22	69	0	0	0	2	0	0	1	0	28	26
PVP01_0503400	PVP01_0503400	PVP01_0503400.1	protein_coding	0	3	2	144	12	0	0	2	0	0	0	0	0	0	0	0	3	132
PVP01_0503500	PVP01_0503500	PVP01_0503500.1	protein_coding	0	4	0	43	27	0	0	0	0	0	0	0	0	0	0	0	4	16
PVP01_0503600	PVP01_0503600	PVP01_0503600.1	protein_coding	0	1	3	37	18	0	1	3	0	0	0	0	0	0	0	0	1	18
PVP01_0503700	PVP01_0503700	PVP01_0503700.1	protein_coding	0	1	0	33	9	0	1	0	0	0	0	0	0	0	0	0	1	23
PVP01_0503800	PVP01_0503800	PVP01_0503800.1	protein_coding	0	2	4	24	16	0	1	4	0	0	0	0	0	0	0	0	2	7
PVP01_0503900	PVP01_0503900	PVP01_0503900.1	protein_coding	0	1	2	34	12	0	2	2	0	0	0	0	0	0	0	0	1	20
PVP01_0504000	PVP01_0504000	PVP01_0504000.1	protein_coding	0	0	4	34	20	0	0	4	0	0	0	0	0	0	0	0	0	14
PVP01_0504100	PVP01_0504100	PVP01_0504100.1	protein_coding	0	2	3	31	17	0	0	3	0	0	0	0	0	0	0	0	2	14
PVP01_0504200	PVP01_0504200	PVP01_0504200.1	protein_coding	0	1	6	27	11	0	0	6	0	0	0	0	0	0	0	0	1	16
PVP01_0504300	PVP01_0504300	PVP01_0504300.1	protein_coding	0	2	0	32	13	0	1	0	0	0	0	0	0	0	0	0	2	18
PVP01_0504400	PVP01_0504400	PVP01_0504400.1	protein_coding	0	0	5	74	56	0	0	5	0	0	0	0	0	0	0	0	0	18
PVP01_0504500	PVP01_0504500	PVP01_0504500.1	rRNA	0	0	0	124	35	0	0	0	49	0	0	0	0	0	0	0	0	40
PVP01_0504600	PVP01_0504600	PVP01_0504600.1	rRNA	0	0	0	84	37	0	0	0	0	0	0	0	0	0	0	0	0	47
PVP01_0504700	PVP01_0504700	PVP01_0504700.1	rRNA	0	0	0	108	35	0	0	0	12	0	0	0	0	0	0	0	0	61
PVP01_0504800	PVP01_0504800	PVP01_0504800.1	protein_coding	0	0	3	46	27	0	0	3	0	0	0	0	0	0	0	0	0	19
PVP01_0504900	PVP01_0504900	PVP01_0504900.1	protein_coding	0	4	15	38	15	0	0	15	0	0	0	0	0	0	0	0	4	23
PVP01_0505000	PVP01_0505000	PVP01_0505000.1	protein_coding	0	2	1	21	13	0	0	1	0	0	0	0	0	0	0	0	2	8
PVP01_0505100	PVP01_0505100	PVP01_0505100.1	protein_coding	0	1	0	26	13	0	1	0	0	0	0	0	0	0	0	0	1	12
PVP01_0505200	PVP01_0505200	PVP01_0505200.1	protein_coding	0	0	0	31	14	0	0	0	0	0	0	0	0	0	0	0	0	17
PVP01_0505300	PVP01_0505300	PVP01_0505300.1	protein_coding	0	2	0	31	12	0	4	0	0	0	0	0	0	0	0	0	2	15
PVP01_0505400	PVP01_0505400	PVP01_0505400.1	protein_coding	0	7	9	29	14	0	0	9	0	0	0	0	0	0	0	0	7	15
PVP01_0505500	PVP01_0505500	PVP01_0505500.1	protein_coding	0	1	0	31	16	0	1	0	0	0	0	0	0	0	0	0	1	14
PVP01_0505600	PVP01_0505600	PVP01_0505600.1	protein_coding	0	2	2	29	12	0	0	2	0	0	0	0	0	0	0	0	2	17
PVP01_0505700	PVP01_0505700	PVP01_0505700.1	protein_coding	1	4	4	27	14	0	0	4	0	0	0	0	0	1	0	0	4	13
PVP01_0505800	PVP01_0505800	PVP01_0505800.1	protein_coding	0	1	2	21	7	0	0	2	0	0	0	0	0	0	0	0	1	14
PVP01_0505900	PVP01_0505900	PVP01_0505900.1	protein_coding	0	0	1	32	20	0	0	1	0	0	0	0	0	0	0	0	0	12
PVP01_0506000	PVP01_0506000	PVP01_0506000.1	protein_coding	0	6	1	28	24	0	0	1	0	0	0	0	0	0	0	0	6	4
PVP01_0506100	PVP01_0506100	PVP01_0506100.1	protein_coding	0	5	5	29	10	0	0	5	0	0	0	0	0	0	0	0	5	19
PVP01_0506200	PVP01_0506200	PVP01_0506200.1	protein_coding	0	4	3	39	26	0	0	3	0	0	0	0	0	0	0	0	4	13
PVP01_0506300	PVP01_0506300	PVP01_0506300.1	protein_coding	0	4	3	25	15	0	0	3	0	0	0	0	0	0	0	0	4	10
PVP01_0506400	PVP01_0506400	PVP01_0506400.1	protein_coding	0	1	3	22	11	0	0	3	0	0	0	0	0	0	0	0	1	11
PVP01_0506500	PVP01_0506500	PVP01_0506500.1	protein_coding	0	1	0	36	18	0	1	0	0	0	0	0	0	0	0	0	1	17
PVP01_0506600	PVP01_0506600	PVP01_0506600.1	protein_coding	0	9	11	22	13	0	0	11	0	0	0	0	0	0	0	0	9	9
PVP01_0506700	PVP01_0506700	PVP01_0506700.1	protein_coding	0	4	3	24	13	0	0	3	0	0	0	0	0	0	0	0	4	11
PVP01_0506800	PVP01_0506800	PVP01_0506800.1	protein_coding	0	7	4	33	19	0	0	4	0	0	0	0	0	0	0	0	7	14
PVP01_0506900	PVP01_0506900	PVP01_0506900.1	protein_coding	0	0	2	28	13	0	0	2	0	0	0	0	0	0	0	0	0	15
PVP01_0507000	PVP01_0507000	PVP01_0507000.1	protein_coding	0	2	2	24	14	0	0	2	0	0	0	0	0	0	0	0	2	10
PVP01_0507100	PVP01_0507100	PVP01_0507100.1	protein_coding	0	5	2	32	17	0	0	2	0	0	0	0	0	0	0	0	5	15
PVP01_0507200	PVP01_0507200	PVP01_0507200.1	protein_coding	0	4	9	29	10	0	0	9	0	0	0	0	0	0	0	0	4	19
PVP01_0507300	PVP01_0507300	PVP01_0507300.1	protein_coding	0	4	6	31	18	0	0	6	0	0	0	0	0	0	0	0	4	13
PVP01_0507400	PVP01_0507400	PVP01_0507400.1	protein_coding	0	3	3	37	20	0	0	3	0	0	0	0	0	0	0	0	3	17
PVP01_0507500	PVP01_0507500	PVP01_0507500.1	protein_coding	0	4	4	32	11	0	1	4	0	0	0	0	0	0	0	0	4	20
PVP01_0507600	PVP01_0507600	PVP01_0507600.1	protein_coding	0	1	0	30	8	0	0	0	0	0	0	0	0	0	0	0	1	22
PVP01_0507700	PVP01_0507700	PVP01_0507700.1	protein_coding	0	0	2	29	12	0	0	2	0	0	0	0	0	0	0	0	0	17
PVP01_0507800	PVP01_0507800	PVP01_0507800.1	protein_coding	0	6	3	18	9	0	0	3	0	0	0	0	0	0	0	0	6	9
PVP01_0507900	PVP01_0507900	PVP01_0507900.1	protein_coding	0	1	1	23	8	0	1	1	0	0	0	1	0	0	0	0	0	15
PVP01_0508000	PVP01_0508000	PVP01_0508000.1	protein_coding	0	0	2	23	7	0	0	2	0	0	0	0	0	0	0	0	0	16
PVP01_0508100	PVP01_0508100	PVP01_0508100.1	protein_coding	0	4	5	24	15	0	0	5	0	0	0	0	0	0	0	0	4	9
PVP01_0508200	PVP01_0508200	PVP01_0508200.1	protein_coding	0	28	33	25	11	0	0	33	0	0	0	0	0	0	0	0	28	14
PVP01_0508300	PVP01_0508300	PVP01_0508300.1	protein_coding	0	2	5	27	8	0	0	5	0	0	0	0	0	0	0	0	2	19
PVP01_0508400	PVP01_0508400	PVP01_0508400.1	protein_coding	0	6	6	23	11	0	0	6	0	0	0	0	0	0	0	0	6	12
PVP01_0508500	PVP01_0508500	PVP01_0508500.1	protein_coding	0	0	1	30	22	0	0	1	0	0	0	0	0	0	0	0	0	8
PVP01_0508600	PVP01_0508600	PVP01_0508600.1	protein_coding	0	1	1	17	6	0	0	1	0	0	0	0	0	0	0	0	1	11
PVP01_0508700	PVP01_0508700	PVP01_0508700.1	protein_coding	0	0	0	14	5	0	0	0	0	0	0	0	0	0	0	0	0	9
PVP01_0508800	PVP01_0508800	PVP01_0508800.1	protein_coding	0	0	0	17	9	0	0	0	0	0	0	0	0	0	0	0	0	8
PVP01_0508900	PVP01_0508900	PVP01_0508900.1	protein_coding	0	0	0	23	6	0	1	0	0	0	0	0	0	0	0	0	0	16
PVP01_0509000	PVP01_0509000	PVP01_0509000.1	protein_coding	0	0	1	20	16	0	0	1	0	0	0	0	0	0	0	0	0	4
PVP01_0509100	PVP01_0509100	PVP01_0509100.1	protein_coding	0	3	0	20	7	0	3	0	0	0	0	1	0	0	0	0	2	11
PVP01_0509200	PVP01_0509200	PVP01_0509200.1	protein_coding	0	1	2	20	10	0	4	2	0	0	0	0	0	0	0	0	1	6
PVP01_0509300	PVP01_0509300	PVP01_0509300.1	protein_coding	0	1	7	37	16	0	1	7	0	0	0	0	0	0	0	0	1	20
PVP01_0509400	PVP01_0509400	PVP01_0509400.1	protein_coding	0	5	12	26	13	0	0	12	0	0	0	0	0	0	0	0	5	13
PVP01_0509500	PVP01_0509500	PVP01_0509500.1	protein_coding	0	5	8	29	22	0	0	8	0	0	0	0	0	0	0	0	5	7
PVP01_0509600	PVP01_0509600	PVP01_0509600.1	protein_coding	0	0	2	27	13	0	4	2	0	0	0	0	0	0	0	0	0	10
PVP01_0509700	PVP01_0509700	PVP01_0509700.1	protein_coding	0	3	0	26	8	0	3	0	0	0	0	1	0	0	0	0	2	16
PVP01_0509800	PVP01_0509800	PVP01_0509800.1	protein_coding	0	2	1	25	10	0	1	1	0	0	0	1	0	0	0	0	1	15
PVP01_0509900	PVP01_0509900	PVP01_0509900.1	protein_coding	0	0	7	19	4	0	0	7	0	0	0	0	0	0	0	0	0	15
PVP01_0510000	PVP01_0510000	PVP01_0510000.1	protein_coding	0	0	0	23	5	0	0	0	0	0	0	0	0	0	0	0	0	18
PVP01_0510100	PVP01_0510100	PVP01_0510100.1	protein_coding	0	2	0	21	11	0	0	0	0	0	0	0	0	0	0	0	2	10
PVP01_0510200	PVP01_0510200	PVP01_0510200.1	protein_coding	0	2	1	11	5	0	0	1	0	0	0	0	0	0	0	0	2	6
PVP01_0510300	PVP01_0510300	PVP01_0510300.1	protein_coding	0	0	3	25	16	0	0	3	0	0	0	0	0	0	0	0	0	9
PVP01_0510400	PVP01_0510400	PVP01_0510400.1	protein_coding	0	0	0	23	8	0	0	0	0	0	0	0	0	0	0	0	0	15
PVP01_0510500	PVP01_0510500	PVP01_0510500.1	protein_coding	0	3	1	21	13	0	0	1	0	0	0	0	0	0	0	0	3	8
PVP01_0510600	PVP01_0510600	PVP01_0510600.1	protein_coding	0	0	0	28	13	0	0	0	0	0	0	0	0	0	0	0	0	15
PVP01_0510700	PVP01_0510700	PVP01_0510700.1	protein_coding	0	3	0	24	12	0	0	0	0	0	0	0	0	0	0	0	3	12
PVP01_0510800	PVP01_0510800	PVP01_0510800.1	protein_coding	0	1	6	20	11	0	0	6	0	0	0	0	0	0	0	0	1	9
PVP01_0510900	PVP01_0510900	PVP01_0510900.1	protein_coding	1	0	1	34	14	0	1	1	0	0	0	0	0	1	0	0	0	19
PVP01_0511000	PVP01_0511000	PVP01_0511000.1	protein_coding	0	2	5	45	11	0	10	5	0	0	0	0	0	0	0	0	2	24
PVP01_0511100	PVP01_0511100	PVP01_0511100.1	protein_coding	0	0	1	44	19	0	0	1	0	0	0	0	0	0	0	0	0	25
PVP01_0511200	PVP01_0511200	PVP01_0511200.1	protein_coding	0	0	1	44	21	0	1	1	0	0	0	0	0	0	0	0	0	22
PVP01_0511300	PVP01_0511300	PVP01_0511300.1	protein_coding	0	8	5	44	26	0	0	5	0	0	0	0	0	0	0	0	8	18
PVP01_0511400	PVP01_0511400	PVP01_0511400.1	protein_coding	0	7	15	39	23	0	0	15	0	0	0	0	0	0	0	0	7	16
PVP01_0511500	PVP01_0511500	PVP01_0511500.1	protein_coding	0	2	1	49	27	0	0	1	0	0	0	0	0	0	0	0	2	22
PVP01_0511600	PVP01_0511600	PVP01_0511600.1	protein_coding	0	1	10	43	12	0	0	10	0	0	0	0	0	0	0	0	1	31
PVP01_0511700	PVP01_0511700	PVP01_0511700.1	protein_coding	0	0	0	38	25	0	1	0	0	0	0	0	0	0	0	0	0	12
PVP01_0511800	PVP01_0511800	PVP01_0511800.1	protein_coding	0	0	0	23	11	0	2	0	0	0	0	0	0	0	0	0	0	10
PVP01_0511900	PVP01_0511900	PVP01_0511900.1	protein_coding	0	2	3	25	12	0	5	3	0	0	0	1	0	0	0	0	1	9
PVP01_0512000	PVP01_0512000	PVP01_0512000.1	protein_coding	0	1	0	20	10	0	0	0	0	0	0	0	0	0	0	0	1	10
PVP01_0512100	PVP01_0512100	PVP01_0512100.1	protein_coding	0	4	2	30	12	0	3	2	0	0	0	0	0	0	0	0	4	15
PVP01_0512200	PVP01_0512200	PVP01_0512200.1	protein_coding	0	0	4	19	11	0	0	4	0	0	0	0	0	0	0	0	0	8
PVP01_0512300	PVP01_0512300	PVP01_0512300.1	protein_coding	0	0	1	38	10	0	4	1	0	0	0	0	0	0	0	0	0	24
PVP01_0512400	PVP01_0512400	PVP01_0512400.1	protein_coding	0	0	0	38	22	0	3	0	0	0	0	0	0	0	0	0	0	13
PVP01_0512500	PVP01_0512500	PVP01_0512500.1	protein_coding	0	0	0	37	15	0	0	0	0	0	0	0	0	0	0	0	0	22
PVP01_0512600	PVP01_0512600	PVP01_0512600.1	protein_coding	0	0	1	32	22	0	2	1	0	0	0	1	0	0	0	0	0	8
PVP01_0512700	PVP01_0512700	PVP01_0512700.1	protein_coding	0	0	1	36	22	0	0	1	0	0	0	0	0	0	0	0	0	14
PVP01_0512800	PVP01_0512800	PVP01_0512800.1	protein_coding	0	2	0	25	16	0	0	0	0	0	0	0	0	0	0	0	2	9
PVP01_0512900	PVP01_0512900	PVP01_0512900.1	protein_coding	0	0	0	32	11	0	2	0	0	0	0	0	0	0	0	0	0	19
PVP01_0513000	PVP01_0513000	PVP01_0513000.1	protein_coding	0	3	1	44	22	0	3	1	0	0	0	0	0	0	0	0	3	19
PVP01_0513100	PVP01_0513100	PVP01_0513100.1	protein_coding	0	0	0	37	14	0	0	0	0	0	0	0	0	0	0	0	0	23
PVP01_0513200	PVP01_0513200	PVP01_0513200.1	protein_coding	0	6	9	49	15	0	0	9	0	0	0	0	0	0	0	0	6	34
PVP01_0513300	PVP01_0513300	PVP01_0513300.1	protein_coding	0	2	1	63	30	0	17	1	0	0	0	1	0	0	0	0	1	17
PVP01_0513400	PVP01_0513400	PVP01_0513400.1	protein_coding	0	4	5	32	20	0	0	5	0	0	0	0	0	0	0	0	4	12
PVP01_0513500	PVP01_0513500	PVP01_0513500.1	protein_coding	0	2	10	24	16	0	0	10	0	0	0	0	0	0	0	0	2	8
PVP01_0513600	PVP01_0513600	PVP01_0513600.1	protein_coding	0	2	1	52	20	0	0	1	0	0	0	0	0	0	0	0	2	32
PVP01_0513700	PVP01_0513700	PVP01_0513700.1	protein_coding	0	5	2	40	15	0	3	2	0	0	0	0	0	0	0	0	5	22
PVP01_0513800	PVP01_0513800	PVP01_0513800.1	protein_coding	0	3	5	45	32	0	0	5	0	0	0	0	0	0	0	0	3	13
PVP01_0513900	PVP01_0513900	PVP01_0513900.1	protein_coding	0	0	2	34	20	0	0	2	0	0	0	0	0	0	0	0	0	14
PVP01_0514000	PVP01_0514000	PVP01_0514000.1	protein_coding	0	3	2	31	13	0	0	2	0	0	0	0	0	0	0	0	3	18
PVP01_0514100	PVP01_0514100	PVP01_0514100.1	protein_coding	0	2	3	34	16	0	0	3	0	0	0	0	0	0	0	0	2	18
PVP01_0514200	PVP01_0514200	PVP01_0514200.1	protein_coding	0	0	0	36	19	0	1	0	0	0	0	0	0	0	0	0	0	16
PVP01_0514300	PVP01_0514300	PVP01_0514300.1	protein_coding	0	6	3	32	17	0	7	3	0	0	0	1	0	0	0	0	5	9
PVP01_0514400	PVP01_0514400	PVP01_0514400.1	protein_coding	0	0	0	28	18	0	5	0	0	0	0	0	0	0	0	0	0	5
PVP01_0514500	PVP01_0514500	PVP01_0514500.1	protein_coding	0	6	6	31	11	0	9	6	0	0	0	1	0	0	0	0	6	11
PVP01_0514600	PVP01_0514600	PVP01_0514600.1	protein_coding	0	1	1	28	13	0	0	1	0	0	0	0	0	0	0	0	1	15
PVP01_0514700	PVP01_0514700	PVP01_0514700.1	protein_coding	0	4	1	21	9	0	1	1	0	0	0	0	0	0	0	0	4	11
PVP01_0514800	PVP01_0514800	PVP01_0514800.1	protein_coding	0	1	0	28	13	0	5	0	0	0	0	0	0	0	0	0	1	10
PVP01_0514900	PVP01_0514900	PVP01_0514900.1	protein_coding	0	2	1	27	9	0	0	1	0	0	0	0	0	0	0	0	2	18
PVP01_0515000	PVP01_0515000	PVP01_0515000.1	protein_coding	0	7	4	25	10	0	0	4	0	0	0	0	0	0	0	0	7	15
PVP01_0515100	PVP01_0515100	PVP01_0515100.1	protein_coding	0	3	1	27	17	0	0	1	0	0	0	0	0	0	0	0	3	10
PVP01_0515200	PVP01_0515200	PVP01_0515200.1	protein_coding	0	0	0	27	19	0	0	0	0	0	0	0	0	0	0	0	0	8
PVP01_0515300	PVP01_0515300	PVP01_0515300.1	protein_coding	0	2	4	24	11	0	2	4	0	0	0	0	0	0	0	0	2	11
PVP01_0515400	PVP01_0515400	PVP01_0515400.1	protein_coding	0	6	0	22	8	0	0	0	0	0	0	0	0	0	0	0	6	14
PVP01_0515500	PVP01_0515500	PVP01_0515500.1	protein_coding	0	2	2	22	11	0	0	2	0	0	0	0	0	0	0	0	2	11
PVP01_0515600	PVP01_0515600	PVP01_0515600.1	protein_coding	0	0	6	51	27	0	0	6	0	0	0	0	0	0	0	0	0	24
PVP01_0515700	PVP01_0515700	PVP01_0515700.1	protein_coding	0	2	5	52	32	0	1	5	0	0	0	0	0	0	0	0	2	19
PVP01_0515800	PVP01_0515800	PVP01_0515800.1	protein_coding	0	0	2	54	31	0	0	2	0	0	0	0	0	0	0	0	0	23
PVP01_0515900	PVP01_0515900	PVP01_0515900.1	protein_coding	0	6	10	33	13	0	2	10	0	0	0	0	0	0	0	0	6	18
PVP01_0516000	PVP01_0516000	PVP01_0516000.1	protein_coding	0	0	2	42	11	0	1	2	0	0	0	0	0	0	0	0	0	30
PVP01_0516100	PVP01_0516100	PVP01_0516100.1	protein_coding	0	0	4	42	23	0	1	4	0	0	0	0	0	0	0	0	0	18
PVP01_0516200	PVP01_0516200	PVP01_0516200.1	protein_coding	0	0	2	32	10	0	0	2	0	0	0	0	0	0	0	0	0	22
PVP01_0516300	PVP01_0516300	PVP01_0516300.1	protein_coding	1	0	4	36	17	0	0	4	0	0	0	0	0	1	0	0	0	19
PVP01_0516400	PVP01_0516400	PVP01_0516400.1	protein_coding	0	1	0	62	26	0	0	0	0	0	0	0	0	0	0	0	1	36
PVP01_0516500	PVP01_0516500	PVP01_0516500.1	protein_coding	0	11	18	46	19	0	0	18	0	0	0	0	0	0	0	0	11	27
PVP01_0516600	PVP01_0516600	PVP01_0516600.1	protein_coding	0	5	8	58	27	0	6	8	0	0	0	1	0	0	0	0	4	26
PVP01_0516700	PVP01_0516700	PVP01_0516700.1	protein_coding	0	4	2	47	16	0	11	2	0	0	0	2	0	0	0	0	3	21
PVP01_0516800	PVP01_0516800	PVP01_0516800.1	protein_coding	0	1	3	33	22	0	2	3	0	0	0	1	0	0	0	0	0	10
PVP01_0516900	PVP01_0516900	PVP01_0516900.1	protein_coding	0	3	0	27	15	0	0	0	0	0	0	0	0	0	0	0	3	12
PVP01_0517000	PVP01_0517000	PVP01_0517000.1	protein_coding	0	5	2	32	14	0	2	2	0	0	0	0	0	0	0	0	5	16
PVP01_0517100	PVP01_0517100	PVP01_0517100.1	protein_coding	0	2	0	43	17	0	4	0	0	0	0	0	0	0	0	0	2	22
PVP01_0517200	PVP01_0517200	PVP01_0517200.1	protein_coding	0	2	11	37	16	0	1	11	0	0	0	0	0	0	0	0	2	20
PVP01_0517300	PVP01_0517300	PVP01_0517300.1	protein_coding	0	0	0	51	28	0	0	0	0	0	0	0	0	0	0	0	0	23
PVP01_0517400	PVP01_0517400	PVP01_0517400.1	protein_coding	0	1	0	39	23	0	0	0	0	0	0	0	0	0	0	0	1	16
PVP01_0517500	PVP01_0517500	PVP01_0517500.1	protein_coding	0	0	0	44	21	0	2	0	0	0	0	0	0	0	0	0	0	21
PVP01_0517600	PVP01_0517600	PVP01_0517600.1	protein_coding	0	3	5	52	14	0	15	5	0	0	0	1	0	0	0	0	2	24
PVP01_0517700	PVP01_0517700	PVP01_0517700.1	protein_coding	0	4	3	28	16	0	1	3	0	0	0	0	0	0	0	0	4	11
PVP01_0517800	PVP01_0517800	PVP01_0517800.1	protein_coding	0	0	0	37	15	0	1	0	0	0	0	0	0	0	0	0	0	21
PVP01_0517900	PVP01_0517900	PVP01_0517900.1	protein_coding	0	2	1	32	16	0	1	1	0	0	0	0	0	0	0	0	2	15
PVP01_0518000	PVP01_0518000	PVP01_0518000.1	protein_coding	0	0	3	36	18	0	0	3	0	0	0	0	0	0	0	0	0	18
PVP01_0518100	PVP01_0518100	PVP01_0518100.1	protein_coding	0	2	3	26	9	0	0	3	0	0	0	0	0	0	0	0	2	17
PVP01_0518200	PVP01_0518200	PVP01_0518200.1	protein_coding	0	3	2	27	16	0	0	2	0	0	0	0	0	0	0	0	3	11
PVP01_0518300	PVP01_0518300	PVP01_0518300.1	protein_coding	0	1	2	20	11	0	0	2	0	0	0	0	0	0	0	0	1	9
PVP01_0518400	PVP01_0518400	PVP01_0518400.1	protein_coding	0	1	1	25	9	0	0	1	0	0	0	0	0	0	0	0	1	16
PVP01_0518500	PVP01_0518500	PVP01_0518500.1	protein_coding	0	0	1	27	15	0	2	1	0	0	0	0	0	0	0	0	0	10
PVP01_0518600	PVP01_0518600	PVP01_0518600.1	protein_coding	0	2	2	24	11	0	4	2	0	0	0	0	0	0	0	0	2	9
PVP01_0518700	PVP01_0518700	PVP01_0518700.1	protein_coding	0	5	0	36	21	0	0	0	0	0	0	0	0	0	0	0	5	15
PVP01_0518800	PVP01_0518800	PVP01_0518800.1	protein_coding	0	1	0	29	9	0	9	0	0	0	0	0	0	0	0	0	1	11
PVP01_0518900	PVP01_0518900	PVP01_0518900.1	protein_coding	0	1	0	34	19	0	1	0	0	0	0	0	0	0	0	0	1	14
PVP01_0519000	PVP01_0519000	PVP01_0519000.1	protein_coding	0	4	4	37	23	0	3	4	0	0	0	0	0	0	0	0	4	11
PVP01_0519100	PVP01_0519100	PVP01_0519100.1	protein_coding	0	0	0	48	36	0	0	0	0	0	0	0	0	0	0	0	0	12
PVP01_0519200	PVP01_0519200	PVP01_0519200.1	protein_coding	0	2	1	42	7	0	12	1	0	0	0	1	0	0	0	0	1	24
PVP01_0519300	PVP01_0519300	PVP01_0519300.1	protein_coding	0	3	5	36	15	0	0	5	0	0	0	0	0	0	0	0	3	21
PVP01_0519400	PVP01_0519400	PVP01_0519400.1	protein_coding	0	2	0	49	36	0	0	0	0	0	0	0	0	0	0	0	2	13
PVP01_0519500	PVP01_0519500	PVP01_0519500.1	protein_coding	0	3	7	22	13	0	0	7	0	0	0	0	0	0	0	0	3	9
PVP01_0519600	PVP01_0519600	PVP01_0519600.1	protein_coding	0	1	3	26	12	0	2	3	0	0	0	0	0	0	0	0	1	12
PVP01_0519700	PVP01_0519700	PVP01_0519700.1	protein_coding	0	1	0	26	7	0	8	0	0	0	0	0	0	0	0	0	1	11
PVP01_0519800	PVP01_0519800	PVP01_0519800.1	protein_coding	0	0	2	26	16	0	3	2	0	0	0	0	0	0	0	0	0	7
PVP01_0519900	PVP01_0519900	PVP01_0519900.1	protein_coding	0	0	0	25	11	0	0	0	0	0	0	0	0	0	0	0	0	14
PVP01_0520000	PVP01_0520000	PVP01_0520000.1	protein_coding	0	0	0	20	13	0	0	0	0	0	0	0	0	0	0	0	0	7
PVP01_0520100	PVP01_0520100	PVP01_0520100.1	protein_coding	0	3	1	21	9	0	0	1	0	0	0	0	0	0	0	0	3	12
PVP01_0520200	PVP01_0520200	PVP01_0520200.1	protein_coding	0	0	1	23	11	0	0	1	0	0	0	0	0	0	0	0	0	12
PVP01_0520300	PVP01_0520300	PVP01_0520300.1	protein_coding	0	0	0	23	11	0	0	0	0	0	0	0	0	0	0	0	0	12
PVP01_0520400	PVP01_0520400	PVP01_0520400.1	protein_coding	0	4	2	22	8	0	4	2	0	0	0	0	0	0	0	0	4	10
PVP01_0520500	PVP01_0520500	PVP01_0520500.1	protein_coding	0	1	1	31	11	0	12	1	0	0	0	0	0	0	0	0	1	8
PVP01_0520600	PVP01_0520600	PVP01_0520600.1	protein_coding	0	5	6	16	6	0	1	6	0	0	0	0	0	0	0	0	5	9
PVP01_0520700	PVP01_0520700	PVP01_0520700.1	protein_coding	0	0	0	22	10	0	3	0	0	0	0	0	0	0	0	0	0	9
PVP01_0520800	PVP01_0520800	PVP01_0520800.1	protein_coding	0	0	0	21	10	0	0	0	0	0	0	0	0	0	0	0	0	11
PVP01_0520900	PVP01_0520900	PVP01_0520900.1	protein_coding	0	0	0	22	11	0	1	0	0	0	0	0	0	0	0	0	0	10
PVP01_0521000	PVP01_0521000	PVP01_0521000.1	protein_coding	0	0	2	20	10	0	3	2	0	0	0	0	0	0	0	0	0	7
PVP01_0521100	PVP01_0521100	PVP01_0521100.1	protein_coding	0	1	1	21	10	0	0	1	0	0	0	1	0	0	0	0	1	11
PVP01_0521200	PVP01_0521200	PVP01_0521200.1	protein_coding	0	1	0	31	20	0	0	0	0	0	0	0	0	0	0	0	1	11
PVP01_0521300	PVP01_0521300	PVP01_0521300.1	protein_coding	0	1	1	25	11	0	0	1	0	0	0	0	0	0	0	0	1	14
PVP01_0521400	PVP01_0521400	PVP01_0521400.1	protein_coding	0	0	0	37	16	0	9	0	0	0	0	0	0	0	0	0	0	12
PVP01_0521500	PVP01_0521500	PVP01_0521500.1	protein_coding	0	0	0	30	14	0	0	0	0	0	0	0	0	0	0	0	0	16
PVP01_0521600	PVP01_0521600	PVP01_0521600.1	protein_coding	0	0	2	28	9	0	0	2	0	0	0	0	0	0	0	0	0	19
PVP01_0521700	PVP01_0521700	PVP01_0521700.1	protein_coding	0	3	6	32	16	0	0	6	0	0	0	0	0	0	0	0	3	16
PVP01_0521800	PVP01_0521800	PVP01_0521800.1	protein_coding	0	1	14	21	6	0	0	14	0	0	0	0	0	0	0	0	1	15
PVP01_0521900	PVP01_0521900	PVP01_0521900.1	protein_coding	0	0	0	21	14	0	0	0	0	0	0	0	0	0	0	0	0	7
PVP01_0522000	PVP01_0522000	PVP01_0522000.1	protein_coding	0	2	0	17	9	0	0	0	0	0	0	0	0	0	0	0	2	8
PVP01_0522100	PVP01_0522100	PVP01_0522100.1	protein_coding	0	0	0	18	8	0	0	0	0	0	0	0	0	0	0	0	0	10
PVP01_0522200	PVP01_0522200	PVP01_0522200.1	protein_coding	0	2	1	14	6	0	0	1	0	0	0	0	0	0	0	0	2	8
PVP01_0522300	PVP01_0522300	PVP01_0522300.1	protein_coding	0	1	2	30	19	0	0	2	0	0	0	0	0	0	0	0	1	11
PVP01_0522400	PVP01_0522400	PVP01_0522400.1	protein_coding	0	0	0	29	9	0	1	0	0	0	0	0	0	0	0	0	0	19
PVP01_0522500	PVP01_0522500	PVP01_0522500.1	protein_coding	0	4	0	40	20	0	1	0	0	0	0	0	0	0	0	0	4	19
PVP01_0522600	PVP01_0522600	PVP01_0522600.1	protein_coding	0	0	5	36	14	0	0	5	0	0	0	0	0	0	0	0	0	22
PVP01_0522700	PVP01_0522700	PVP01_0522700.1	protein_coding	0	4	0	34	19	0	0	0	0	0	0	0	0	0	0	0	4	15
PVP01_0522800	PVP01_0522800	PVP01_0522800.1	protein_coding	0	2	1	37	15	0	0	1	0	0	0	0	0	0	0	0	2	22
PVP01_0522900	PVP01_0522900	PVP01_0522900.1	protein_coding	0	1	0	37	18	0	0	0	0	0	0	0	0	0	0	0	1	19
PVP01_0523000	PVP01_0523000	PVP01_0523000.1	protein_coding	0	2	7	27	14	0	0	7	0	0	0	0	0	0	0	0	2	13
PVP01_0523100	PVP01_0523100	PVP01_0523100.1	protein_coding	0	1	1	36	20	0	0	1	0	0	0	0	0	0	0	0	1	16
PVP01_0523200	PVP01_0523200	PVP01_0523200.1	protein_coding	0	1	3	31	14	0	0	3	0	0	0	0	0	0	0	0	1	17
PVP01_0523300	PVP01_0523300	PVP01_0523300.1	protein_coding	0	2	2	32	16	0	0	2	0	0	0	0	0	0	0	0	2	16
PVP01_0523400	PVP01_0523400	PVP01_0523400.1	protein_coding	0	0	5	24	9	0	0	5	0	0	0	0	0	0	0	0	0	15
PVP01_0523500	PVP01_0523500	PVP01_0523500.1	protein_coding	0	0	1	27	19	0	0	1	0	0	0	0	0	0	0	0	0	8
PVP01_0523600	PVP01_0523600	PVP01_0523600.1	protein_coding	1	0	1	18	8	0	0	1	0	0	0	0	0	1	0	0	0	10
PVP01_0523700	PVP01_0523700	PVP01_0523700.1	protein_coding	0	1	1	22	14	0	1	1	0	0	0	0	0	0	0	0	1	7
PVP01_0523800	PVP01_0523800	PVP01_0523800.1	protein_coding	0	1	1	30	19	0	0	1	0	0	0	0	0	0	0	0	1	11
PVP01_0523900	PVP01_0523900	PVP01_0523900.1	protein_coding	0	1	2	43	19	0	0	2	0	0	0	0	0	0	0	0	1	24
PVP01_0524000	PVP01_0524000	PVP01_0524000.1	protein_coding	0	3	1	49	24	0	2	1	0	0	0	0	0	0	0	0	3	23
PVP01_0524100	PVP01_0524100	PVP01_0524100.1	protein_coding	0	1	1	46	19	0	4	1	0	0	0	0	0	0	0	0	1	23
PVP01_0524200	PVP01_0524200	PVP01_0524200.1	protein_coding	0	2	2	44	19	0	1	2	0	0	0	0	0	0	0	0	2	24
PVP01_0524300	PVP01_0524300	PVP01_0524300.1	protein_coding	0	0	7	37	18	0	0	7	0	0	0	0	0	0	0	0	0	19
PVP01_0524400	PVP01_0524400	PVP01_0524400.1	protein_coding	2	1	2	36	18	0	1	2	0	0	0	1	0	2	0	0	1	17
PVP01_0524500	PVP01_0524500	PVP01_0524500.1	protein_coding	0	0	2	37	17	0	0	2	0	0	0	0	0	0	0	0	0	20
PVP01_0524600	PVP01_0524600	PVP01_0524600.1	protein_coding	0	0	0	30	14	0	0	0	0	0	0	0	0	0	0	0	0	16
PVP01_0524700	PVP01_0524700	PVP01_0524700.1	protein_coding	0	0	0	70	57	0	0	0	0	0	0	0	0	0	0	0	0	13
PVP01_0524800	PVP01_0524800	PVP01_0524800.1	protein_coding	0	0	0	140	120	0	0	0	0	0	0	0	0	0	0	0	0	20
PVP01_0524900	PVP01_0524900	PVP01_0524900.1	protein_coding	0	12	32	93	36	0	1	32	0	0	0	1	0	0	0	0	11	57
PVP01_0525000	PVP01_0525000	PVP01_0525000.1	protein_coding	0	1	4	134	26	0	0	4	0	0	0	0	0	0	0	0	1	108
PVP01_0525100	PVP01_0525100	PVP01_0525100.1	protein_coding	0	4	19	44	12	0	0	19	0	0	0	0	0	0	0	0	4	32
PVP01_0525200	PVP01_0525200	PVP01_0525200.1	protein_coding	0	1	5	31	12	0	0	5	0	0	0	0	0	0	0	0	1	19
PVP01_0525300	PVP01_0525300	PVP01_0525300.1	protein_coding	0	0	5	34	12	0	0	5	0	0	0	0	0	0	0	0	0	22
PVP01_0525400	PVP01_0525400	PVP01_0525400.1	protein_coding	0	0	6	30	17	0	0	6	0	0	0	0	0	0	0	0	0	13
PVP01_0525500	PVP01_0525500	PVP01_0525500.1	protein_coding	0	2	2	26	9	0	0	2	0	0	0	0	0	0	0	0	2	17
PVP01_0525600	PVP01_0525600	PVP01_0525600.1	protein_coding	0	1	0	20	13	0	0	0	0	0	0	0	0	0	0	0	1	7
PVP01_0525700	PVP01_0525700	PVP01_0525700.1	protein_coding	0	2	3	31	12	0	0	3	0	0	0	0	0	0	0	0	2	19
PVP01_0525800	PVP01_0525800	PVP01_0525800.1	protein_coding	0	9	11	25	11	0	2	11	0	0	0	0	0	0	0	0	9	12
PVP01_0525900	PVP01_0525900	PVP01_0525900.1	protein_coding	0	0	1	35	26	0	0	1	0	0	0	0	0	0	0	0	0	9
PVP01_0526000	PVP01_0526000	PVP01_0526000.1	protein_coding	0	0	1	21	9	0	0	1	0	0	0	0	0	0	0	0	0	12
PVP01_0526100	PVP01_0526100	PVP01_0526100.1	protein_coding	0	0	2	16	8	0	0	2	0	0	0	0	0	0	0	0	0	8
PVP01_0526200	PVP01_0526200	PVP01_0526200.1	protein_coding	0	0	0	31	22	0	1	0	0	0	0	0	0	0	0	0	0	8
PVP01_0526300	PVP01_0526300	PVP01_0526300.1	protein_coding	0	16	22	28	9	0	1	22	0	0	0	0	0	0	0	0	16	18
PVP01_0526400	PVP01_0526400	PVP01_0526400.1	protein_coding	0	1	6	38	19	0	0	6	0	0	0	0	0	0	0	0	1	19
PVP01_0526500	PVP01_0526500	PVP01_0526500.1	protein_coding	0	6	5	37	19	0	3	5	0	0	0	2	0	0	0	0	6	15
PVP01_0526600	PVP01_0526600	PVP01_0526600.1	protein_coding	0	2	7	28	9	0	0	7	0	0	0	0	0	0	0	0	2	19
PVP01_0526700	PVP01_0526700	PVP01_0526700.1	protein_coding	0	1	2	25	12	0	1	2	0	0	0	0	0	0	0	0	1	12
PVP01_0526800	PVP01_0526800	PVP01_0526800.1	protein_coding	0	21	27	21	10	0	0	27	0	0	0	0	0	0	0	0	21	11
PVP01_0526900	PVP01_0526900	PVP01_0526900.1	protein_coding	0	2	0	22	9	0	1	0	0	0	0	1	0	0	0	0	2	12
PVP01_0527000	PVP01_0527000	PVP01_0527000.1	protein_coding	0	3	3	23	8	0	3	3	0	0	0	0	0	0	0	0	3	12
PVP01_0527100	PVP01_0527100	PVP01_0527100.1	protein_coding	0	4	2	20	6	0	1	2	0	0	0	1	0	0	0	0	3	14
PVP01_0527200	PVP01_0527200	PVP01_0527200.1	protein_coding	0	0	0	22	16	0	0	0	0	0	0	0	0	0	0	0	0	6
PVP01_0527300	PVP01_0527300	PVP01_0527300.1	protein_coding	0	2	0	18	10	0	0	0	0	0	0	0	0	0	0	0	2	8
PVP01_0527400	PVP01_0527400	PVP01_0527400.1	protein_coding	0	9	23	24	17	0	2	23	0	0	0	0	0	0	0	0	9	5
PVP01_0527500	PVP01_0527500	PVP01_0527500.1	protein_coding	0	4	4	30	17	0	0	4	0	0	0	0	0	0	0	0	4	13
PVP01_0527600	PVP01_0527600	PVP01_0527600.1	protein_coding	0	0	0	39	27	0	0	0	0	0	0	0	0	0	0	0	0	12
PVP01_0527700	PVP01_0527700	PVP01_0527700.1	protein_coding	0	4	4	33	12	0	0	4	0	0	0	0	0	0	0	0	4	21
PVP01_0527800	PVP01_0527800	PVP01_0527800.1	protein_coding	0	0	0	23	12	0	1	0	0	0	0	0	0	0	0	0	0	10
PVP01_0527900	PVP01_0527900	PVP01_0527900.1	protein_coding	0	0	0	21	9	0	2	0	0	0	0	0	0	0	0	0	0	10
PVP01_0528000	PVP01_0528000	PVP01_0528000.1	protein_coding	0	2	8	23	12	0	0	8	0	0	0	0	0	0	0	0	2	11
PVP01_0528100	PVP01_0528100	PVP01_0528100.1	protein_coding	0	1	2	22	15	0	0	2	0	0	0	0	0	0	0	0	1	7
PVP01_0528200	PVP01_0528200	PVP01_0528200.1	protein_coding	0	1	1	27	10	0	5	1	0	0	0	1	0	0	0	0	1	12
PVP01_0528300	PVP01_0528300	PVP01_0528300.1	protein_coding	0	0	0	34	18	0	1	0	0	0	0	0	0	0	0	0	0	15
PVP01_0528400	PVP01_0528400	PVP01_0528400.1	protein_coding	0	0	4	40	21	0	10	4	0	0	0	0	0	0	0	0	0	9
PVP01_0528500	PVP01_0528500	PVP01_0528500.1	protein_coding	0	1	0	43	21	0	3	0	0	0	0	0	0	0	0	0	1	19
PVP01_0528600	PVP01_0528600	PVP01_0528600.1	protein_coding	0	1	1	34	13	0	0	1	0	0	0	0	0	0	0	0	1	21
PVP01_0528700	PVP01_0528700	PVP01_0528700.1	protein_coding	0	1	1	41	22	0	1	1	0	0	0	0	0	0	0	0	1	18
PVP01_0528800	PVP01_0528800	PVP01_0528800.1	protein_coding	0	12	8	26	6	0	5	8	0	0	0	0	0	0	0	0	12	15
PVP01_0528900	PVP01_0528900	PVP01_0528900.1	protein_coding	0	1	1	34	14	0	0	1	0	0	0	0	0	0	0	0	1	20
PVP01_0529000	PVP01_0529000	PVP01_0529000.1	protein_coding	0	1	1	29	9	0	1	1	0	0	0	0	0	0	0	0	1	19
PVP01_0529100	PVP01_0529100	PVP01_0529100.1	protein_coding	0	1	0	33	13	0	0	0	0	0	0	0	0	0	0	0	1	20
PVP01_0529200	PVP01_0529200	PVP01_0529200.1	protein_coding	0	1	0	22	9	0	0	0	0	0	0	0	0	0	0	0	1	13
PVP01_0529300	PVP01_0529300	PVP01_0529300.1	protein_coding	0	15	21	25	9	0	3	21	0	0	0	0	0	0	0	0	15	13
PVP01_0529400	PVP01_0529400	PVP01_0529400.1	protein_coding	0	10	20	15	7	0	0	20	0	0	0	0	0	0	0	0	10	8
PVP01_0529500	PVP01_0529500	PVP01_0529500.1	protein_coding	0	5	7	31	20	0	0	7	0	0	0	0	0	0	0	0	5	11
PVP01_0529600	PVP01_0529600	PVP01_0529600.1	protein_coding	0	3	17	37	17	0	0	17	0	0	0	0	0	0	0	0	3	20
PVP01_0529700	PVP01_0529700	PVP01_0529700.1	protein_coding	0	1	8	40	20	0	0	8	0	0	0	0	0	0	0	0	1	20
PVP01_0529800	PVP01_0529800	PVP01_0529800.1	protein_coding	0	11	29	34	26	0	0	29	0	0	0	0	0	0	0	0	11	8
PVP01_0529900	PVP01_0529900	PVP01_0529900.1	protein_coding	0	1	2	49	16	0	0	2	0	0	0	0	0	0	0	0	1	33
PVP01_0530000	PVP01_0530000	PVP01_0530000.1	protein_coding	0	1	0	47	39	0	1	0	0	0	0	0	0	0	0	0	1	7
PVP01_0530100	PVP01_0530100	PVP01_0530100.1	protein_coding	0	0	0	40	14	0	0	0	0	0	0	0	0	0	0	0	0	26
PVP01_0530200	PVP01_0530200	PVP01_0530200.1	protein_coding	0	8	10	28	16	0	3	10	0	0	0	0	0	0	0	0	8	9
PVP01_0530300	PVP01_0530300	PVP01_0530300.1	protein_coding	0	0	1	27	15	0	0	1	0	0	0	0	0	0	0	0	0	12
PVP01_0530400	PVP01_0530400	PVP01_0530400.1	protein_coding	0	0	0	34	20	0	0	0	0	0	0	0	0	0	0	0	0	14
PVP01_0530500	PVP01_0530500	PVP01_0530500.1	protein_coding	0	0	2	39	24	0	2	2	0	0	0	0	0	0	0	0	0	13
PVP01_0530600	PVP01_0530600	PVP01_0530600.1	protein_coding	0	0	0	45	22	0	0	0	0	0	0	0	0	0	0	0	0	23
PVP01_0530700	PVP01_0530700	PVP01_0530700.1	protein_coding	0	14	39	25	15	0	0	39	0	0	0	0	0	0	0	0	14	10
PVP01_0530800	PVP01_0530800	PVP01_0530800.1	protein_coding	0	0	0	34	18	0	2	0	0	0	0	0	0	0	0	0	0	14
PVP01_0530900	PVP01_0530900	PVP01_0530900.1	protein_coding	0	2	2	27	6	0	1	2	0	0	0	0	0	0	0	0	2	20
PVP01_0531000	PVP01_0531000	PVP01_0531000.1	protein_coding	0	10	8	34	16	0	0	8	0	0	0	0	0	0	0	0	10	18
PVP01_0531100	PVP01_0531100	PVP01_0531100.1	protein_coding	0	0	1	31	19	0	0	1	0	0	0	0	0	0	0	0	0	12
PVP01_0531200	PVP01_0531200	PVP01_0531200.1	protein_coding	0	0	0	39	18	0	0	0	0	0	0	0	0	0	0	0	0	21
PVP01_0531300	PVP01_0531300	PVP01_0531300.1	protein_coding	0	3	1	36	18	0	0	1	0	0	0	0	0	0	0	0	3	18
PVP01_0531400	PVP01_0531400	PVP01_0531400.1	protein_coding	0	2	3	33	20	0	2	3	0	0	0	0	0	0	0	0	2	11
PVP01_0531500	PVP01_0531500	PVP01_0531500.1	protein_coding	0	1	2	35	19	0	0	2	0	0	0	0	0	0	0	0	1	16
PVP01_0531600	PVP01_0531600	PVP01_0531600.1	protein_coding	0	2	0	35	16	0	2	0	0	0	0	1	0	0	0	0	1	18
PVP01_0531700	PVP01_0531700	PVP01_0531700.1	protein_coding	0	0	0	37	12	0	0	0	0	0	0	0	0	0	0	0	0	25
PVP01_0531800	PVP01_0531800	PVP01_0531800.1	protein_coding	0	2	3	43	21	0	0	3	0	0	0	0	0	0	0	0	2	22
PVP01_0531900	PVP01_0531900	PVP01_0531900.1	protein_coding	0	11	5	22	11	0	0	5	0	0	0	0	0	0	0	0	11	11
PVP01_0532000	PVP01_0532000	PVP01_0532000.1	protein_coding	0	0	1	52	25	0	3	1	0	0	0	0	0	0	0	0	0	24
PVP01_0532100	PVP01_0532100	PVP01_0532100.1	protein_coding	0	10	7	36	17	0	0	7	0	0	0	0	0	0	0	0	10	19
PVP01_0532200	PVP01_0532200	PVP01_0532200.1	protein_coding	0	0	1	42	17	0	0	1	0	0	0	0	0	0	0	0	0	25
PVP01_0532300	PVP01_0532300	PVP01_0532300.1	protein_coding	0	1	0	52	24	0	2	0	0	0	0	0	0	0	0	0	1	26
PVP01_0532400	PVP01_0532400	PVP01_0532400.1	protein_coding	0	2	30	35	26	0	0	30	0	0	0	0	0	0	0	0	2	9
PVP01_0532500	PVP01_0532500	PVP01_0532500.1	protein_coding	0	1	1	57	18	0	2	1	0	0	0	1	0	0	0	0	0	38
PVP01_0532600	PVP01_0532600	PVP01_0532600.1	protein_coding	0	0	3	29	10	0	0	3	0	0	0	0	0	0	0	0	0	19
PVP01_0532700	PVP01_0532700	PVP01_0532700.1	protein_coding	0	0	2	50	21	0	0	2	0	0	0	0	0	0	0	0	0	29
PVP01_0532800	PVP01_0532800	PVP01_0532800.1	protein_coding	0	1	1	46	22	0	4	1	0	0	0	0	0	0	0	0	1	20
PVP01_0532900	PVP01_0532900	PVP01_0532900.1	protein_coding	0	0	7	28	23	0	1	7	0	0	0	0	0	0	0	0	0	4
PVP01_0533000	PVP01_0533000	PVP01_0533000.1	protein_coding	0	2	4	21	11	0	0	4	0	0	0	0	0	0	0	0	2	10
PVP01_0533100	PVP01_0533100	PVP01_0533100.1	protein_coding	0	0	1	60	14	0	0	1	0	0	0	0	0	0	0	0	0	46
PVP01_0533200	PVP01_0533200	PVP01_0533200.1	protein_coding	0	3	4	114	68	0	0	4	0	0	0	0	0	0	0	0	3	46
PVP01_0533300	PVP01_0533300	PVP01_0533300.1	protein_coding	0	12	16	288	51	0	0	16	0	0	0	0	0	0	0	0	12	237
PVP01_0533400	PVP01_0533400	PVP01_0533400.1	protein_coding	0	10	12	415	227	0	4	12	0	0	0	0	0	0	0	0	10	184
PVP01_0533500	PVP01_0533500	PVP01_0533500.1	protein_coding	1	14	16	333	120	0	13	16	0	0	0	1	0	1	0	0	13	201
PVP01_0533600	PVP01_0533600	PVP01_0533600.1	protein_coding	0	29	69	282	91	0	17	69	0	0	0	3	0	0	0	0	27	176
PVP01_0533700	PVP01_0533700	PVP01_0533700.1	protein_coding	0	0	3	322	125	0	0	3	0	0	0	0	0	0	0	0	0	197
PVP01_0533800	PVP01_0533800	PVP01_0533800.1	protein_coding	0	4	26	216	115	0	8	26	0	0	0	0	0	0	0	0	4	93
PVP01_0533900	PVP01_0533900	PVP01_0533900.1	protein_coding	0	8	33	221	96	0	10	33	0	0	0	2	0	0	0	0	6	117
PVP01_0534000	PVP01_0534000	PVP01_0534000.1	protein_coding	0	9	21	150	11	0	7	21	0	0	0	0	0	0	0	0	9	132
PVP01_0534100	PVP01_0534100	PVP01_0534100.1	protein_coding	0	2	3	48	35	0	1	3	0	0	0	0	0	0	0	0	2	12
PVP01_0534200	PVP01_0534200	PVP01_0534200.1	protein_coding	0	0	0	136	109	0	0	0	0	0	0	0	0	0	0	0	0	27
PVP01_0534300	PVP01_0534300	PVP01_0534300.1	protein_coding	0	40	111	105	35	0	2	111	0	0	0	0	0	0	0	0	40	68
PVP01_0534400	PVP01_0534400	PVP01_0534400.1	protein_coding	1	12	29	89	63	0	3	29	0	0	0	0	0	1	0	0	12	23
PVP01_0534500	PVP01_0534500	PVP01_0534500.1	protein_coding	1	9	29	122	86	0	6	29	0	0	0	1	0	1	0	0	8	31
PVP01_0534600	PVP01_0534600	PVP01_0534600.1	protein_coding	0	6	18	159	118	0	1	18	0	0	0	1	0	0	0	0	6	40
PVP01_0534700	PVP01_0534700	PVP01_0534700.1	protein_coding	0	6	21	188	109	0	5	21	0	0	0	1	0	0	0	1	5	74
PVP01_0534800	PVP01_0534800	PVP01_0534800.1	protein_coding	0	7	11	175	82	0	3	11	0	0	0	3	0	0	0	0	5	92
PVP01_0534900	PVP01_0534900	PVP01_0534900.1	protein_coding	0	7	21	104	5	0	3	21	0	0	0	0	0	0	0	0	7	96
PVP01_0535000	PVP01_0535000	PVP01_0535000.1	protein_coding	0	0	0	9	4	0	0	0	0	0	0	0	0	0	0	0	0	5
PVP01_0535100	PVP01_0535100	PVP01_0535100.1	protein_coding	0	0	0	6	0	0	0	0	0	0	0	0	0	0	0	0	0	6
PVP01_0535200	PVP01_0535200	PVP01_0535200.1	protein_coding	0	0	0	10	7	0	0	0	0	0	0	0	0	0	0	0	0	3
PVP01_0535300	PVP01_0535300	PVP01_0535300.1	protein_coding	0	3	4	11	11	0	0	4	0	0	0	0	0	0	0	0	3	0
PVP01_0535400	PVP01_0535400	PVP01_0535400.1	protein_coding	0	2	1	15	0	0	1	1	0	0	0	0	0	0	0	0	2	14
PVP01_0600100	PVP01_0600100	PVP01_0600100.1	protein_coding	0	3	12	140	0	0	0	12	0	0	0	0	0	0	0	0	3	140
PVP01_0600200	PVP01_0600200	PVP01_0600200.1	protein_coding	0	7	20	174	85	0	7	20	0	0	0	0	0	0	0	0	7	82
PVP01_0600300	PVP01_0600300	PVP01_0600300.1	protein_coding	1	1	3	241	117	0	2	3	0	0	0	1	0	1	0	0	1	122
PVP01_0600400	PVP01_0600400	PVP01_0600400.1	protein_coding	0	20	32	151	109	0	3	32	0	0	0	4	0	0	0	0	17	42
PVP01_0600500	PVP01_0600500	PVP01_0600500.1	protein_coding	0	0	3	209	102	0	0	3	0	0	0	0	0	0	0	0	0	107
PVP01_0600600	PVP01_0600600	PVP01_0600600.1	protein_coding	2	17	52	186	40	0	9	52	0	0	0	0	0	2	0	0	17	137
PVP01_0600700	PVP01_0600700	PVP01_0600700.1	protein_coding	1	17	53	285	111	0	19	53	0	0	0	2	1	0	0	0	15	157
PVP01_0600800	PVP01_0600800	PVP01_0600800.1	protein_coding	1	9	35	299	190	0	9	35	0	0	0	0	0	1	0	0	9	100
PVP01_0600900	PVP01_0600900	PVP01_0600900.1	protein_coding	0	1	3	123	31	0	0	3	0	0	0	0	0	0	0	0	1	92
PVP01_0601000	PVP01_0601000	PVP01_0601000.1	protein_coding	0	1	0	58	22	0	2	0	0	0	0	0	0	0	0	0	1	34
PVP01_0601100	PVP01_0601100	PVP01_0601100.1	protein_coding	4	2	3	45	28	0	0	3	0	0	0	0	0	2	2	0	2	17
PVP01_0601200	PVP01_0601200	PVP01_0601200.1	protein_coding	0	5	0	43	23	0	4	0	0	0	0	0	0	0	0	0	5	16
PVP01_0601300	PVP01_0601300	PVP01_0601300.1	protein_coding	0	2	4	48	15	0	1	4	0	0	0	0	0	0	0	0	2	32
PVP01_0601400	PVP01_0601400	PVP01_0601400.1	protein_coding	0	5	12	47	22	0	1	12	0	0	0	0	0	0	0	0	5	24
PVP01_0601500	PVP01_0601500	PVP01_0601500.1	protein_coding	0	1	3	76	35	0	2	3	0	0	0	0	0	0	0	0	1	39
PVP01_0601600	PVP01_0601600	PVP01_0601600.1	protein_coding	0	9	13	38	18	0	0	13	0	0	0	0	0	0	0	0	9	20
PVP01_0601700	PVP01_0601700	PVP01_0601700.1	protein_coding	0	0	1	58	39	0	0	1	0	0	0	0	0	0	0	0	0	19
PVP01_0601800	PVP01_0601800	PVP01_0601800.1	protein_coding	0	1	2	42	17	0	0	2	0	0	0	0	0	0	0	0	1	25
PVP01_0601900	PVP01_0601900	PVP01_0601900.1	protein_coding	0	0	5	34	17	0	1	5	0	0	0	0	0	0	0	0	0	16
PVP01_0602000	PVP01_0602000	PVP01_0602000.1	protein_coding	0	0	1	47	28	0	0	1	0	0	0	0	0	0	0	0	0	19
PVP01_0602100	PVP01_0602100	PVP01_0602100.1	protein_coding	0	1	6	34	14	0	0	6	0	0	0	0	0	0	0	0	1	20
PVP01_0602200	PVP01_0602200	PVP01_0602200.1	protein_coding	0	4	2	45	17	0	0	2	0	0	0	0	0	0	0	0	4	28
PVP01_0602300	PVP01_0602300	PVP01_0602300.1	protein_coding	0	0	2	44	20	0	0	2	0	0	0	0	0	0	0	0	0	24
PVP01_0602400	PVP01_0602400	PVP01_0602400.1	protein_coding	0	4	1	45	27	0	2	1	0	0	0	0	0	0	0	0	4	16
PVP01_0602500	PVP01_0602500	PVP01_0602500.1	protein_coding	0	3	13	30	17	0	0	13	0	0	0	0	0	0	0	0	3	13
PVP01_0602600	PVP01_0602600	PVP01_0602600.1	protein_coding	0	1	0	41	26	0	3	0	0	0	0	1	0	0	0	0	0	13
PVP01_0602700	PVP01_0602700	PVP01_0602700.1	protein_coding	0	1	0	24	10	0	2	0	0	0	0	0	0	0	0	0	1	12
PVP01_0602800	PVP01_0602800	PVP01_0602800.1	protein_coding	0	1	2	23	10	0	0	2	0	0	0	0	0	0	0	0	1	13
PVP01_0602900	PVP01_0602900	PVP01_0602900.1	protein_coding	0	1	3	21	11	0	0	3	0	0	0	0	0	0	0	0	1	10
PVP01_0603000	PVP01_0603000	PVP01_0603000.1	protein_coding	0	2	2	34	9	0	0	2	0	0	0	0	0	0	0	0	2	25
PVP01_0603100	PVP01_0603100	PVP01_0603100.1	protein_coding	0	3	3	31	18	0	3	3	0	0	0	0	0	0	0	0	3	10
PVP01_0603200	PVP01_0603200	PVP01_0603200.1	protein_coding	0	1	1	36	11	0	0	1	0	0	0	0	0	0	0	0	1	25
PVP01_0603300	PVP01_0603300	PVP01_0603300.1	protein_coding	0	3	1	33	7	0	0	1	0	0	0	0	0	0	0	0	3	26
PVP01_0603400	PVP01_0603400	PVP01_0603400.1	protein_coding	0	8	11	48	23	0	0	11	0	0	0	0	0	0	0	0	8	25
PVP01_0603500	PVP01_0603500	PVP01_0603500.1	protein_coding	0	5	5	33	24	0	0	5	0	0	0	0	0	0	0	0	5	9
PVP01_0603600	PVP01_0603600	PVP01_0603600.1	protein_coding	0	0	2	25	5	0	0	2	0	0	0	0	0	0	0	0	0	20
PVP01_0603700	PVP01_0603700	PVP01_0603700.1	protein_coding	0	0	0	24	18	0	1	0	0	0	0	0	0	0	0	0	0	5
PVP01_0603800	PVP01_0603800	PVP01_0603800.1	protein_coding	0	2	3	20	7	0	0	3	0	0	0	0	0	0	0	0	2	13
PVP01_0603900	PVP01_0603900	PVP01_0603900.1	protein_coding	0	1	5	43	32	0	0	5	0	0	0	0	0	0	0	0	1	11
PVP01_0604000	PVP01_0604000	PVP01_0604000.1	protein_coding	0	10	10	38	24	0	0	10	0	0	0	0	0	0	0	0	10	14
PVP01_0604100	PVP01_0604100	PVP01_0604100.1	protein_coding	0	5	9	51	26	0	0	9	0	0	0	0	0	0	0	0	5	25
PVP01_0604200	PVP01_0604200	PVP01_0604200.1	protein_coding	0	13	26	45	19	0	2	26	0	0	0	0	0	0	0	0	13	24
PVP01_0604300	PVP01_0604300	PVP01_0604300.1	protein_coding	0	3	14	32	22	0	0	14	0	0	0	0	0	0	0	0	3	10
PVP01_0604400	PVP01_0604400	PVP01_0604400.1	protein_coding	0	0	0	33	18	0	0	0	0	0	0	0	0	0	0	0	0	15
PVP01_0604500	PVP01_0604500	PVP01_0604500.1	protein_coding	0	5	11	32	14	0	3	11	0	0	0	0	0	0	0	0	5	15
PVP01_0604600	PVP01_0604600	PVP01_0604600.1	protein_coding	0	0	0	36	23	0	0	0	0	0	0	0	0	0	0	0	0	13
PVP01_0604700	PVP01_0604700	PVP01_0604700.1	protein_coding	0	4	6	45	17	0	19	6	0	0	0	0	0	0	0	0	4	9
PVP01_0604800	PVP01_0604800	PVP01_0604800.1	protein_coding	0	0	4	30	15	0	0	4	0	0	0	0	0	0	0	0	0	15
PVP01_0604900	PVP01_0604900	PVP01_0604900.1	protein_coding	0	2	7	18	9	0	0	7	0	0	0	0	0	0	0	0	2	9
PVP01_0605000	PVP01_0605000	PVP01_0605000.1	protein_coding	0	1	4	25	13	0	0	4	0	0	0	0	0	0	0	0	1	12
PVP01_0605100	PVP01_0605100	PVP01_0605100.1	protein_coding	0	0	0	21	13	0	0	0	0	0	0	0	0	0	0	0	0	8
PVP01_0605200	PVP01_0605200	PVP01_0605200.1	protein_coding	0	2	0	37	12	0	2	0	0	0	0	0	0	0	0	0	2	23
PVP01_0605300	PVP01_0605300	PVP01_0605300.1	protein_coding	0	0	0	31	10	0	3	0	0	0	0	0	0	0	0	0	0	18
PVP01_0605400	PVP01_0605400	PVP01_0605400.1	protein_coding	0	2	4	38	13	0	9	4	0	0	0	0	0	0	0	0	2	16
PVP01_0605500	PVP01_0605500	PVP01_0605500.1	protein_coding	0	4	3	34	17	0	0	3	0	0	0	0	0	0	0	0	4	17
PVP01_0605600	PVP01_0605600	PVP01_0605600.1	protein_coding	0	4	7	22	10	0	0	7	0	0	0	0	0	0	0	0	4	12
PVP01_0605700	PVP01_0605700	PVP01_0605700.1	protein_coding	0	2	1	31	13	0	0	1	0	0	0	0	0	0	0	0	2	18
PVP01_0605800	PVP01_0605800	PVP01_0605800.1	protein_coding	0	6	8	29	14	0	0	8	0	0	0	0	0	0	0	0	6	15
PVP01_0605900	PVP01_0605900	PVP01_0605900.1	protein_coding	0	5	2	49	29	0	3	2	0	0	0	0	0	0	0	0	5	17
PVP01_0606000	PVP01_0606000	PVP01_0606000.1	protein_coding	0	1	6	63	36	0	6	6	0	0	0	1	0	0	0	0	1	21
PVP01_0606100	PVP01_0606100	PVP01_0606100.1	protein_coding	0	3	0	64	30	0	16	0	0	0	0	0	0	0	0	0	3	18
PVP01_0606200	PVP01_0606200	PVP01_0606200.1	protein_coding	0	1	1	48	35	0	2	1	0	0	0	0	0	0	0	0	1	11
PVP01_0606300	PVP01_0606300	PVP01_0606300.1	protein_coding	0	7	5	66	33	0	0	5	0	0	0	0	0	0	0	0	7	33
PVP01_0606400	PVP01_0606400	PVP01_0606400.1	protein_coding	0	3	2	54	29	0	0	2	0	0	0	0	0	0	0	0	3	25
PVP01_0606500	PVP01_0606500	PVP01_0606500.1	protein_coding	0	1	3	49	33	0	6	3	0	0	0	0	0	0	0	0	1	10
PVP01_0606600	PVP01_0606600	PVP01_0606600.1	protein_coding	0	0	3	42	15	0	1	3	0	0	0	0	0	0	0	0	0	26
PVP01_0606700	PVP01_0606700	PVP01_0606700.1	protein_coding	0	0	0	33	11	0	0	0	0	0	0	0	0	0	0	0	0	22
PVP01_0606800	PVP01_0606800	PVP01_0606800.1	protein_coding	0	1	6	26	17	0	0	6	0	0	0	0	0	0	0	0	1	9
PVP01_0606900	PVP01_0606900	PVP01_0606900.1	protein_coding	0	25	45	32	14	0	3	45	0	0	0	1	0	0	0	0	25	15
PVP01_0607000	PVP01_0607000	PVP01_0607000.1	protein_coding	0	1	9	32	6	0	7	9	0	0	0	0	0	0	0	0	1	19
PVP01_0607100	PVP01_0607100	PVP01_0607100.1	protein_coding	0	10	7	20	10	0	0	7	0	0	0	0	0	0	0	0	10	10
PVP01_0607200	PVP01_0607200	PVP01_0607200.1	protein_coding	0	12	10	28	10	0	2	10	0	0	0	0	0	0	0	0	12	16
PVP01_0607300	PVP01_0607300	PVP01_0607300.1	protein_coding	0	1	1	31	22	0	0	1	0	0	0	0	0	0	0	0	1	9
PVP01_0607400	PVP01_0607400	PVP01_0607400.1	protein_coding	0	2	2	23	13	0	1	2	0	0	0	0	0	0	0	0	2	9
PVP01_0607500	PVP01_0607500	PVP01_0607500.1	protein_coding	0	0	1	13	3	0	1	1	0	0	0	0	0	0	0	0	0	9
PVP01_0607600	PVP01_0607600	PVP01_0607600.1	protein_coding	0	0	1	7	2	0	0	1	0	0	0	0	0	0	0	0	0	5
PVP01_0607700	PVP01_0607700	PVP01_0607700.1	protein_coding	0	0	3	13	2	0	0	3	0	0	0	0	0	0	0	0	0	11
PVP01_0607800	PVP01_0607800	PVP01_0607800.1	protein_coding	0	1	1	17	5	0	0	1	0	0	0	0	0	0	0	0	1	12
PVP01_0607900	PVP01_0607900	PVP01_0607900.1	protein_coding	0	0	0	18	9	0	0	0	0	0	0	0	0	0	0	0	0	9
PVP01_0608000	PVP01_0608000	PVP01_0608000.1	protein_coding	0	4	3	16	12	0	0	3	0	0	0	0	0	0	0	0	4	4
PVP01_0608100	PVP01_0608100	PVP01_0608100.1	protein_coding	0	0	0	21	9	0	2	0	0	0	0	0	0	0	0	0	0	10
PVP01_0608200	PVP01_0608200	PVP01_0608200.1	protein_coding	0	2	1	25	10	0	0	1	0	0	0	0	0	0	0	0	2	15
PVP01_0608300	PVP01_0608300	PVP01_0608300.1	protein_coding	0	16	21	18	11	0	0	21	0	0	0	0	0	0	0	0	16	7
PVP01_0608400	PVP01_0608400	PVP01_0608400.1	protein_coding	0	0	1	17	6	0	0	1	0	0	0	0	0	0	0	0	0	11
PVP01_0608500	PVP01_0608500	PVP01_0608500.1	protein_coding	0	1	0	23	12	0	2	0	0	0	0	0	0	0	0	0	1	9
PVP01_0608600	PVP01_0608600	PVP01_0608600.1	protein_coding	0	0	0	20	12	0	2	0	0	0	0	0	0	0	0	0	0	6
PVP01_0608700	PVP01_0608700	PVP01_0608700.1	protein_coding	0	0	0	19	7	0	0	0	0	0	0	0	0	0	0	0	0	12
PVP01_0608800	PVP01_0608800	PVP01_0608800.1	protein_coding	0	1	2	24	7	0	5	2	0	0	0	0	0	0	0	0	1	12
PVP01_0608900	PVP01_0608900	PVP01_0608900.1	protein_coding	0	0	2	27	16	0	0	2	0	0	0	0	0	0	0	0	0	11
PVP01_0609000	PVP01_0609000	PVP01_0609000.1	protein_coding	0	2	4	20	8	0	1	4	0	0	0	0	0	0	0	0	2	11
PVP01_0609100	PVP01_0609100	PVP01_0609100.1	protein_coding	0	11	9	29	14	0	0	9	0	0	0	0	0	0	0	0	11	15
PVP01_0609200	PVP01_0609200	PVP01_0609200.1	protein_coding	0	0	2	56	42	0	0	2	0	0	0	0	0	0	0	0	0	14
PVP01_0609300	PVP01_0609300	PVP01_0609300.1	protein_coding	0	4	34	40	14	0	0	34	0	0	0	0	0	0	0	0	4	26
PVP01_0609400	PVP01_0609400	PVP01_0609400.1	protein_coding	0	0	0	70	39	0	0	0	0	0	0	0	0	0	0	0	0	31
PVP01_0609500	PVP01_0609500	PVP01_0609500.1	protein_coding	0	2	3	53	15	0	0	3	0	0	0	0	0	0	0	0	2	38
PVP01_0609600	PVP01_0609600	PVP01_0609600.1	protein_coding	0	3	2	43	34	0	2	2	0	0	0	0	0	0	0	0	3	7
PVP01_0609700	PVP01_0609700	PVP01_0609700.1	protein_coding	0	2	1	36	7	0	0	1	0	0	0	0	0	0	0	0	2	29
PVP01_0609800	PVP01_0609800	PVP01_0609800.1	protein_coding	0	0	1	44	31	0	0	1	0	0	0	0	0	0	0	0	0	13
PVP01_0609900	PVP01_0609900	PVP01_0609900.1	protein_coding	0	1	1	25	14	0	0	1	0	0	0	0	0	0	0	0	1	11
PVP01_0610000	PVP01_0610000	PVP01_0610000.1	protein_coding	0	2	2	30	17	0	0	2	0	0	0	0	0	0	0	0	2	13
PVP01_0610100	PVP01_0610100	PVP01_0610100.1	protein_coding	0	3	6	24	9	0	0	6	0	0	0	0	0	0	0	0	3	15
PVP01_0610200	PVP01_0610200	PVP01_0610200.1	protein_coding	0	5	1	39	14	0	5	1	0	0	0	0	0	0	0	0	5	20
PVP01_0610300	PVP01_0610300	PVP01_0610300.1	protein_coding	0	0	1	35	16	0	0	1	0	0	0	0	0	0	0	0	0	19
PVP01_0610400	PVP01_0610400	PVP01_0610400.1	protein_coding	0	0	0	30	13	0	0	0	0	0	0	0	0	0	0	0	0	17
PVP01_0610500	PVP01_0610500	PVP01_0610500.1	protein_coding	0	1	3	26	8	0	0	3	0	0	0	0	0	0	0	0	1	18
PVP01_0610600	PVP01_0610600	PVP01_0610600.1	protein_coding	0	4	7	35	15	0	7	7	0	0	0	0	0	0	0	0	4	13
PVP01_0610700	PVP01_0610700	PVP01_0610700.1	protein_coding	0	13	25	39	19	0	6	25	0	0	0	0	0	0	0	0	13	14
PVP01_0610800	PVP01_0610800	PVP01_0610800.1	protein_coding	0	1	0	27	14	0	0	0	0	0	0	0	0	0	0	0	1	13
PVP01_0610900	PVP01_0610900	PVP01_0610900.1	protein_coding	0	0	0	29	15	0	0	0	0	0	0	0	0	0	0	0	0	14
PVP01_0611000	PVP01_0611000	PVP01_0611000.1	protein_coding	0	2	0	32	15	0	3	0	0	0	0	0	0	0	0	0	2	14
PVP01_0611100	PVP01_0611100	PVP01_0611100.1	protein_coding	0	3	5	38	14	0	9	5	0	0	0	0	0	0	0	0	3	15
PVP01_0611200	PVP01_0611200	PVP01_0611200.1	protein_coding	0	3	4	23	14	0	0	4	0	0	0	0	0	0	0	0	3	9
PVP01_0611300	PVP01_0611300	PVP01_0611300.1	protein_coding	0	0	2	23	8	0	1	2	0	0	0	0	0	0	0	0	0	14
PVP01_0611400	PVP01_0611400	PVP01_0611400.1	protein_coding	0	0	1	34	16	0	0	1	0	0	0	0	0	0	0	0	0	18
PVP01_0611500	PVP01_0611500	PVP01_0611500.1	protein_coding	0	3	3	39	31	0	0	3	0	0	0	0	0	0	0	0	3	8
PVP01_0611600	PVP01_0611600	PVP01_0611600.1	protein_coding	0	7	3	37	9	0	0	3	0	0	0	0	0	0	0	0	7	28
PVP01_0611700	PVP01_0611700	PVP01_0611700.1	protein_coding	0	0	0	43	17	0	0	0	0	0	0	0	0	0	0	0	0	26
PVP01_0611800	PVP01_0611800	PVP01_0611800.1	protein_coding	0	2	23	33	20	0	0	23	0	0	0	0	0	0	0	0	2	13
PVP01_0611900	PVP01_0611900	PVP01_0611900.1	protein_coding	0	2	0	38	25	0	0	0	0	0	0	0	0	0	0	0	2	13
PVP01_0612000	PVP01_0612000	PVP01_0612000.1	protein_coding	0	1	1	48	38	0	0	1	0	0	0	0	0	0	0	0	1	10
PVP01_0612100	PVP01_0612100	PVP01_0612100.1	protein_coding	0	8	30	30	11	0	0	30	0	0	0	0	0	0	0	0	8	19
PVP01_0612200	PVP01_0612200	PVP01_0612200.1	protein_coding	0	2	5	23	17	0	0	5	0	0	0	0	0	0	0	0	2	6
PVP01_0612300	PVP01_0612300	PVP01_0612300.1	protein_coding	0	1	0	36	20	0	0	0	0	0	0	0	0	0	0	0	1	16
PVP01_0612400	PVP01_0612400	PVP01_0612400.1	protein_coding	0	2	2	33	9	0	4	2	0	0	0	0	0	0	0	0	2	20
PVP01_0612500	PVP01_0612500	PVP01_0612500.1	protein_coding	0	1	0	36	21	0	1	0	0	0	0	1	0	0	0	0	0	15
PVP01_0612600	PVP01_0612600	PVP01_0612600.1	protein_coding	0	1	0	31	8	0	0	0	0	0	0	0	0	0	0	0	1	23
PVP01_0612700	PVP01_0612700	PVP01_0612700.1	protein_coding	0	0	1	31	18	0	2	1	0	0	0	0	0	0	0	0	0	11
PVP01_0612800	PVP01_0612800	PVP01_0612800.1	protein_coding	0	1	0	33	14	0	3	0	0	0	0	1	0	0	0	0	0	17
PVP01_0612900	PVP01_0612900	PVP01_0612900.1	protein_coding	0	3	0	38	10	0	0	0	0	0	0	0	0	0	0	0	3	28
PVP01_0613000	PVP01_0613000	PVP01_0613000.1	protein_coding	0	4	1	40	10	0	13	1	0	0	0	2	0	0	0	0	2	19
PVP01_0613100	PVP01_0613100	PVP01_0613100.1	protein_coding	0	3	1	47	16	0	4	1	0	0	0	0	0	0	0	0	3	27
PVP01_0613200	PVP01_0613200	PVP01_0613200.1	protein_coding	0	1	6	20	9	0	0	6	0	0	0	0	0	0	0	0	1	11
PVP01_0613300	PVP01_0613300	PVP01_0613300.1	protein_coding	0	0	1	23	14	0	0	1	0	0	0	0	0	0	0	0	0	9
PVP01_0613400	PVP01_0613400	PVP01_0613400.1	protein_coding	0	0	1	26	9	0	0	1	0	0	0	0	0	0	0	0	0	17
PVP01_0613500	PVP01_0613500	PVP01_0613500.1	protein_coding	0	1	0	34	25	0	0	0	0	0	0	0	0	0	0	0	1	9
PVP01_0613600	PVP01_0613600	PVP01_0613600.1	protein_coding	0	5	7	37	7	0	0	7	0	0	0	0	0	0	0	0	5	30
PVP01_0613700	PVP01_0613700	PVP01_0613700.1	protein_coding	0	2	3	50	24	0	4	3	0	0	0	2	0	0	0	0	1	23
PVP01_0613800	PVP01_0613800	PVP01_0613800.1	protein_coding	0	0	5	32	11	0	0	5	0	0	0	0	0	0	0	0	0	21
PVP01_0613900	PVP01_0613900	PVP01_0613900.1	protein_coding	0	0	0	31	24	0	1	0	0	0	0	0	0	0	0	0	0	6
PVP01_0614000	PVP01_0614000	PVP01_0614000.1	protein_coding	0	0	1	29	17	0	0	1	0	0	0	0	0	0	0	0	0	12
PVP01_0614100	PVP01_0614100	PVP01_0614100.1	protein_coding	0	1	7	22	6	0	1	7	0	0	0	0	0	0	0	0	1	15
PVP01_0614200	PVP01_0614200	PVP01_0614200.1	protein_coding	0	3	4	37	16	0	3	4	0	0	0	0	0	0	0	0	3	18
PVP01_0614300	PVP01_0614300	PVP01_0614300.1	protein_coding	0	4	2	26	12	0	0	2	0	0	0	0	0	0	0	0	4	14
PVP01_0614400	PVP01_0614400	PVP01_0614400.1	protein_coding	0	6	4	39	14	0	0	4	0	0	0	0	0	0	0	0	6	25
PVP01_0614500	PVP01_0614500	PVP01_0614500.1	protein_coding	0	2	2	45	11	0	0	2	0	0	0	0	0	0	0	0	2	34
PVP01_0614600	PVP01_0614600	PVP01_0614600.1	protein_coding	0	1	2	41	25	0	0	2	0	0	0	0	0	0	0	0	1	16
PVP01_0614700	PVP01_0614700	PVP01_0614700.1	protein_coding	0	3	2	42	11	0	0	2	0	0	0	0	0	0	0	0	3	31
PVP01_0614800	PVP01_0614800	PVP01_0614800.1	protein_coding	0	3	2	35	27	0	2	2	0	0	0	1	0	0	0	0	2	7
PVP01_0614900	PVP01_0614900	PVP01_0614900.1	protein_coding	0	2	2	20	11	0	0	2	0	0	0	0	0	0	0	0	2	9
PVP01_0615000	PVP01_0615000	PVP01_0615000.1	protein_coding	0	12	16	42	31	0	0	16	0	0	0	0	0	0	0	0	12	11
PVP01_0615100	PVP01_0615100	PVP01_0615100.1	protein_coding	0	0	0	56	11	0	13	0	0	0	0	0	0	0	0	0	0	32
PVP01_0615200	PVP01_0615200	PVP01_0615200.1	protein_coding	0	2	0	63	43	0	8	0	0	0	0	2	0	0	0	0	0	14
PVP01_0615300	PVP01_0615300	PVP01_0615300.1	protein_coding	0	1	3	27	12	0	0	3	0	0	0	0	0	0	0	0	1	15
PVP01_0615400	PVP01_0615400	PVP01_0615400.1	protein_coding	0	3	7	28	12	0	0	7	0	0	0	0	0	0	0	0	3	16
PVP01_0615500	PVP01_0615500	PVP01_0615500.1	protein_coding	0	1	0	28	18	0	3	0	0	0	0	0	0	0	0	0	1	7
PVP01_0615600	PVP01_0615600	PVP01_0615600.1	protein_coding	0	1	2	26	14	0	0	2	0	0	0	0	0	0	0	0	1	12
PVP01_0615700	PVP01_0615700	PVP01_0615700.1	protein_coding	0	1	1	37	13	0	0	1	0	0	0	0	0	0	0	0	1	24
PVP01_0615800	PVP01_0615800	PVP01_0615800.1	protein_coding	0	1	3	31	20	0	0	3	0	0	0	0	0	0	0	0	1	11
PVP01_0615900	PVP01_0615900	PVP01_0615900.1	protein_coding	0	0	0	38	23	0	0	0	0	0	0	0	0	0	0	0	0	15
PVP01_0616000	PVP01_0616000	PVP01_0616000.1	protein_coding	0	2	4	33	17	0	0	4	0	0	0	0	0	0	0	0	2	16
PVP01_0616100	PVP01_0616100	PVP01_0616100.1	protein_coding	0	0	3	35	23	0	0	3	0	0	0	0	0	0	0	0	0	12
PVP01_0616200	PVP01_0616200	PVP01_0616200.1	protein_coding	0	1	0	35	22	0	1	0	0	0	0	0	0	0	0	0	1	12
PVP01_0616300	PVP01_0616300	PVP01_0616300.1	protein_coding	0	0	0	29	14	0	0	0	0	0	0	0	0	0	0	0	0	15
PVP01_0616400	PVP01_0616400	PVP01_0616400.1	protein_coding	0	0	4	22	10	0	0	4	0	0	0	0	0	0	0	0	0	12
PVP01_0616500	PVP01_0616500	PVP01_0616500.1	protein_coding	0	2	0	29	14	0	2	0	0	0	0	0	0	0	0	0	2	13
PVP01_0616600	PVP01_0616600	PVP01_0616600.1	protein_coding	0	6	1	24	9	0	6	1	0	0	0	1	0	0	0	0	5	10
PVP01_0616700	PVP01_0616700	PVP01_0616700.1	protein_coding	0	1	4	23	9	0	0	4	0	0	0	0	0	0	0	0	1	14
PVP01_0616800	PVP01_0616800	PVP01_0616800.1	protein_coding	0	1	0	19	8	0	1	0	0	0	0	0	0	0	0	0	1	10
PVP01_0616900	PVP01_0616900	PVP01_0616900.1	protein_coding	0	0	0	27	12	0	1	0	0	0	0	0	0	0	0	0	0	14
PVP01_0617000	PVP01_0617000	PVP01_0617000.1	protein_coding	0	1	2	28	11	0	3	2	0	0	0	1	0	0	0	0	0	15
PVP01_0617100	PVP01_0617100	PVP01_0617100.1	protein_coding	0	0	4	26	11	0	1	4	0	0	0	0	0	0	0	0	0	14
PVP01_0617200	PVP01_0617200	PVP01_0617200.1	protein_coding	0	0	4	31	16	0	0	4	0	0	0	0	0	0	0	0	0	15
PVP01_0617300	PVP01_0617300	PVP01_0617300.1	protein_coding	0	4	1	20	10	0	2	1	0	0	0	1	0	0	0	0	3	9
PVP01_0617400	PVP01_0617400	PVP01_0617400.1	protein_coding	0	0	1	27	10	0	0	1	0	0	0	0	0	0	0	0	0	17
PVP01_0617500	PVP01_0617500	PVP01_0617500.1	protein_coding	0	0	0	30	10	0	6	0	0	0	0	0	0	0	0	0	0	14
PVP01_0617600	PVP01_0617600	PVP01_0617600.1	protein_coding	0	0	0	25	10	0	0	0	0	0	0	0	0	0	0	0	0	15
PVP01_0617700	PVP01_0617700	PVP01_0617700.1	protein_coding	0	2	1	19	6	0	0	1	0	0	0	0	0	0	0	0	2	13
PVP01_0617800	PVP01_0617800	PVP01_0617800.1	protein_coding	0	0	1	25	14	0	0	1	0	0	0	0	0	0	0	0	0	11
PVP01_0617900	PVP01_0617900	PVP01_0617900.1	protein_coding	0	1	0	22	10	0	1	0	0	0	0	0	0	0	0	0	1	11
PVP01_0618000	PVP01_0618000	PVP01_0618000.1	protein_coding	0	1	2	24	12	0	0	2	0	0	0	0	0	0	0	0	1	12
PVP01_0618100	PVP01_0618100	PVP01_0618100.1	protein_coding	0	0	1	18	13	0	0	1	0	0	0	0	0	0	0	0	0	5
PVP01_0618200	PVP01_0618200	PVP01_0618200.1	protein_coding	0	4	3	29	12	0	0	3	0	0	0	0	0	0	0	0	4	17
PVP01_0618300	PVP01_0618300	PVP01_0618300.1	protein_coding	0	0	5	36	15	0	0	5	0	0	0	0	0	0	0	0	0	21
PVP01_0618400	PVP01_0618400	PVP01_0618400.1	protein_coding	0	0	1	30	15	0	1	1	0	0	0	0	0	0	0	0	0	14
PVP01_0618500	PVP01_0618500	PVP01_0618500.1	protein_coding	0	1	1	25	10	0	0	1	0	0	0	0	0	0	0	0	1	15
PVP01_0618600	PVP01_0618600	PVP01_0618600.1	protein_coding	0	1	4	34	20	0	0	4	0	0	0	0	0	0	0	0	1	14
PVP01_0618700	PVP01_0618700	PVP01_0618700.1	protein_coding	0	1	3	36	12	0	0	3	0	0	0	0	0	0	0	0	1	24
PVP01_0618800	PVP01_0618800	PVP01_0618800.1	protein_coding	0	2	0	33	13	0	0	0	0	0	0	1	0	0	0	0	2	20
PVP01_0618900	PVP01_0618900	PVP01_0618900.1	protein_coding	0	1	1	47	24	0	2	1	0	0	0	0	0	0	0	0	1	21
PVP01_0619000	PVP01_0619000	PVP01_0619000.1	protein_coding	0	1	0	40	10	0	6	0	0	0	0	0	0	0	0	0	1	24
PVP01_0619100	PVP01_0619100	PVP01_0619100.1	protein_coding	0	1	1	43	28	0	0	1	0	0	0	0	0	0	0	0	1	15
PVP01_0619200	PVP01_0619200	PVP01_0619200.1	protein_coding	0	0	1	29	16	0	3	1	0	0	0	0	0	0	0	0	0	10
PVP01_0619300	PVP01_0619300	PVP01_0619300.1	protein_coding	0	0	1	25	7	0	0	1	0	0	0	0	0	0	0	0	0	18
PVP01_0619400	PVP01_0619400	PVP01_0619400.1	protein_coding	0	1	1	20	5	0	0	1	0	0	0	0	0	0	0	0	1	15
PVP01_0619500	PVP01_0619500	PVP01_0619500.1	protein_coding	0	0	0	16	10	0	0	0	0	0	0	0	0	0	0	0	0	6
PVP01_0619600	PVP01_0619600	PVP01_0619600.1	protein_coding	0	0	2	19	11	0	4	2	0	0	0	0	0	0	0	0	0	4
PVP01_0619700	PVP01_0619700	PVP01_0619700.1	protein_coding	0	2	3	16	7	0	0	3	0	0	0	0	0	0	0	0	2	9
PVP01_0619800	PVP01_0619800	PVP01_0619800.1	protein_coding	0	0	1	26	13	0	0	1	0	0	0	0	0	0	0	0	0	13
PVP01_0619900	PVP01_0619900	PVP01_0619900.1	protein_coding	0	1	0	31	11	0	5	0	0	0	0	0	0	0	0	0	1	15
PVP01_0620000	PVP01_0620000	PVP01_0620000.1	protein_coding	0	3	1	30	17	0	0	1	0	0	0	0	0	0	0	0	3	13
PVP01_0620100	PVP01_0620100	PVP01_0620100.1	protein_coding	1	6	8	26	10	0	0	8	0	0	0	0	0	1	0	0	6	16
PVP01_0620200	PVP01_0620200	PVP01_0620200.1	protein_coding	0	1	2	48	31	0	0	2	0	0	0	0	0	0	0	0	1	17
PVP01_0620300	PVP01_0620300	PVP01_0620300.1	protein_coding	0	1	5	88	68	0	0	5	0	0	0	0	0	0	0	0	1	20
PVP01_0620400	PVP01_0620400	PVP01_0620400.1	protein_coding	0	9	39	46	12	0	0	39	0	0	0	0	0	0	0	0	9	34
PVP01_0620500	PVP01_0620500	PVP01_0620500.1	protein_coding	0	1	6	81	13	0	0	6	0	0	0	0	0	0	0	0	1	68
PVP01_0620600	PVP01_0620600	PVP01_0620600.1	protein_coding	0	1	2	61	49	0	0	2	0	0	0	0	0	0	0	0	1	12
PVP01_0620700	PVP01_0620700	PVP01_0620700.1	protein_coding	0	7	31	32	17	0	0	31	0	0	0	0	0	0	0	0	7	15
PVP01_0620800	PVP01_0620800	PVP01_0620800.1	protein_coding	0	6	8	70	24	0	0	8	0	0	0	0	0	0	0	0	6	46
PVP01_0620900	PVP01_0620900	PVP01_0620900.1	protein_coding	0	2	7	36	10	0	0	7	0	0	0	0	0	0	0	0	2	26
PVP01_0621000	PVP01_0621000	PVP01_0621000.1	protein_coding	0	0	0	40	14	0	2	0	0	0	0	0	0	0	0	0	0	24
PVP01_0621100	PVP01_0621100	PVP01_0621100.1	protein_coding	0	0	1	37	20	0	2	1	0	0	0	0	0	0	0	0	0	15
PVP01_0621200	PVP01_0621200	PVP01_0621200.1	protein_coding	0	0	3	34	11	0	8	3	0	0	0	0	0	0	0	0	0	15
PVP01_0621300	PVP01_0621300	PVP01_0621300.1	protein_coding	0	4	12	28	17	0	1	12	0	0	0	0	0	0	0	0	4	10
PVP01_0621400	PVP01_0621400	PVP01_0621400.1	protein_coding	0	4	3	22	12	0	0	3	0	0	0	0	0	0	0	0	4	10
PVP01_0621500	PVP01_0621500	PVP01_0621500.1	protein_coding	0	3	2	16	6	0	0	2	0	0	0	0	0	0	0	0	3	10
PVP01_0621600	PVP01_0621600	PVP01_0621600.1	protein_coding	0	2	1	31	19	0	2	1	0	0	0	0	0	0	0	0	2	10
PVP01_0621700	PVP01_0621700	PVP01_0621700.1	protein_coding	0	1	2	21	8	0	0	2	0	0	0	0	0	0	0	0	1	13
PVP01_0621800	PVP01_0621800	PVP01_0621800.1	protein_coding	0	1	1	26	18	0	0	1	0	0	0	0	0	0	0	0	1	8
PVP01_0621900	PVP01_0621900	PVP01_0621900.1	protein_coding	0	5	0	18	15	0	0	0	0	0	0	0	0	0	0	0	5	3
PVP01_0622000	PVP01_0622000	PVP01_0622000.1	protein_coding	0	3	2	24	13	0	3	2	0	0	0	0	0	0	0	0	3	8
PVP01_0622100	PVP01_0622100	PVP01_0622100.1	protein_coding	0	0	0	27	12	0	0	0	0	0	0	0	0	0	0	0	0	15
PVP01_0622200	PVP01_0622200	PVP01_0622200.1	protein_coding	0	2	3	40	11	0	11	3	0	0	0	0	0	0	0	0	2	18
PVP01_0622300	PVP01_0622300	PVP01_0622300.1	protein_coding	0	1	1	31	17	0	4	1	0	0	0	0	0	0	0	0	1	10
PVP01_0622400	PVP01_0622400	PVP01_0622400.1	protein_coding	0	0	0	32	9	0	2	0	0	0	0	0	0	0	0	0	0	21
PVP01_0622500	PVP01_0622500	PVP01_0622500.1	protein_coding	0	0	5	43	17	0	0	5	0	0	0	0	0	0	0	0	0	26
PVP01_0622600	PVP01_0622600	PVP01_0622600.1	protein_coding	0	0	0	36	26	0	0	0	0	0	0	0	0	0	0	0	0	10
PVP01_0622700	PVP01_0622700	PVP01_0622700.1	protein_coding	0	3	2	36	9	0	15	2	0	0	0	0	0	0	0	0	3	12
PVP01_0622800	PVP01_0622800	PVP01_0622800.1	rRNA	0	0	0	55	25	0	0	0	18	0	0	0	0	0	0	0	0	12
PVP01_0622900	PVP01_0622900	PVP01_0622900.1	rRNA	0	0	0	49	26	0	0	0	0	0	0	0	0	0	0	0	0	23
PVP01_0623000	PVP01_0623000	PVP01_0623000.1	protein_coding	0	0	6	46	32	0	0	6	0	0	0	0	0	0	0	0	0	14
PVP01_0623100	PVP01_0623100	PVP01_0623100.1	protein_coding	0	6	6	25	13	0	0	6	0	0	0	0	0	0	0	0	6	12
PVP01_0623200	PVP01_0623200	PVP01_0623200.1	protein_coding	0	0	3	21	7	0	0	3	0	0	0	0	0	0	0	0	0	14
PVP01_0623300	PVP01_0623300	PVP01_0623300.1	protein_coding	0	0	0	26	15	0	1	0	0	0	0	0	0	0	0	0	0	10
PVP01_0623400	PVP01_0623400	PVP01_0623400.1	protein_coding	0	0	2	28	15	0	0	2	0	0	0	0	0	0	0	0	0	13
PVP01_0623500	PVP01_0623500	PVP01_0623500.1	protein_coding	0	2	6	42	26	0	0	6	0	0	0	0	0	0	0	0	2	16
PVP01_0623600	PVP01_0623600	PVP01_0623600.1	protein_coding	0	0	24	16	11	0	0	24	0	0	0	0	0	0	0	0	0	5
PVP01_0623700	PVP01_0623700	PVP01_0623700.1	protein_coding	0	1	0	44	26	0	1	0	0	0	0	0	0	0	0	0	1	17
PVP01_0623800	PVP01_0623800	PVP01_0623800.1	protein_coding	1	3	30	27	13	0	1	30	0	0	0	0	0	1	0	0	3	13
PVP01_0623900	PVP01_0623900	PVP01_0623900.1	protein_coding	0	1	0	35	18	0	0	0	0	0	0	0	0	0	0	0	1	17
PVP01_0624000	PVP01_0624000	PVP01_0624000.1	protein_coding	0	1	2	28	13	0	2	2	0	0	0	1	0	0	0	0	0	14
PVP01_0624100	PVP01_0624100	PVP01_0624100.1	protein_coding	0	7	11	17	11	0	0	11	0	0	0	0	0	0	0	0	7	6
PVP01_0624200	PVP01_0624200	PVP01_0624200.1	protein_coding	0	1	1	26	15	0	0	1	0	0	0	0	0	0	0	0	1	11
PVP01_0624300	PVP01_0624300	PVP01_0624300.1	protein_coding	0	0	1	30	15	0	0	1	0	0	0	0	0	0	0	0	0	15
PVP01_0624400	PVP01_0624400	PVP01_0624400.1	protein_coding	0	2	3	66	52	0	1	3	0	0	0	0	0	0	0	0	2	13
PVP01_0624500	PVP01_0624500	PVP01_0624500.1	protein_coding	1	0	4	75	15	0	3	4	0	0	0	0	0	1	0	0	0	57
PVP01_0624600	PVP01_0624600	PVP01_0624600.1	protein_coding	0	2	6	114	47	0	1	6	0	0	0	0	0	0	0	0	2	66
PVP01_0624700	PVP01_0624700	PVP01_0624700.1	protein_coding	1	1	4	92	46	0	1	4	0	0	0	1	0	1	0	0	0	46
PVP01_0624800	PVP01_0624800	PVP01_0624800.1	protein_coding	0	2	6	113	64	0	1	6	0	0	0	1	0	0	0	0	1	49
PVP01_0624900	PVP01_0624900	PVP01_0624900.1	protein_coding	0	8	13	53	29	0	0	13	0	0	0	0	0	0	0	0	8	24
PVP01_0625000	PVP01_0625000	PVP01_0625000.1	protein_coding	0	2	4	63	19	0	0	4	0	0	0	0	0	0	0	0	2	44
PVP01_0700100	PVP01_0700100	PVP01_0700100.1	protein_coding	1	61	103	106	0	0	3	103	0	0	0	0	0	1	0	0	61	103
PVP01_0700200	PVP01_0700200	PVP01_0700200.1	protein_coding	0	6	37	241	81	0	6	37	0	0	0	0	0	0	0	0	6	154
PVP01_0700300	PVP01_0700300	PVP01_0700300.1	protein_coding	2	7	16	187	8	0	7	16	0	0	1	0	1	0	0	0	7	173
PVP01_0700400	PVP01_0700400	PVP01_0700400.1	protein_coding	0	1	0	36	14	0	0	0	0	0	0	0	0	0	0	0	1	22
PVP01_0700500	PVP01_0700500	PVP01_0700500.1	protein_coding	0	6	21	189	179	0	0	21	0	0	0	0	0	0	0	0	6	10
PVP01_0700600	PVP01_0700600	PVP01_0700600.1	protein_coding	0	14	60	130	58	0	7	60	0	0	0	1	0	0	0	0	13	66
PVP01_0700700	PVP01_0700700	PVP01_0700700.1	protein_coding	0	1	0	124	11	0	1	0	0	0	0	0	0	0	0	0	1	112
PVP01_0700800	PVP01_0700800	PVP01_0700800.1	protein_coding	0	1	2	18	7	0	0	2	0	0	0	0	0	0	0	0	1	11
PVP01_0700900	PVP01_0700900	PVP01_0700900.1	protein_coding	0	1	1	21	11	0	0	1	0	0	0	0	0	0	0	0	1	10
PVP01_0701000	PVP01_0701000	PVP01_0701000.1	protein_coding	0	0	3	28	18	0	1	3	0	0	0	0	0	0	0	0	0	9
PVP01_0701100	PVP01_0701100	PVP01_0701100.1	protein_coding	0	5	16	25	16	0	0	16	0	0	0	0	0	0	0	0	5	9
PVP01_0701200	PVP01_0701200	PVP01_0701200.1	protein_coding	0	8	42	23	9	0	1	42	0	0	0	0	0	0	0	0	8	13
PVP01_0701300	PVP01_0701300	PVP01_0701300.1	protein_coding	0	0	0	38	14	0	0	0	0	0	0	0	0	0	0	0	0	24
PVP01_0701400	PVP01_0701400	PVP01_0701400.1	protein_coding	0	2	2	23	7	0	0	2	0	0	0	0	0	0	0	0	2	16
PVP01_0701500	PVP01_0701500	PVP01_0701500.1	protein_coding	0	0	0	22	16	0	0	0	0	0	0	0	0	0	0	0	0	6
PVP01_0701600	PVP01_0701600	PVP01_0701600.1	protein_coding	0	0	0	26	12	0	1	0	0	0	0	0	0	0	0	0	0	13
PVP01_0701700	PVP01_0701700	PVP01_0701700.1	protein_coding	0	4	16	24	12	0	0	16	0	0	0	0	0	0	0	0	4	12
PVP01_0701800	PVP01_0701800	PVP01_0701800.1	protein_coding	0	3	7	25	8	0	2	7	0	0	0	0	0	0	0	0	3	15
PVP01_0701900	PVP01_0701900	PVP01_0701900.1	protein_coding	0	3	7	25	11	0	0	7	0	0	0	0	0	0	0	0	3	14
PVP01_0702000	PVP01_0702000	PVP01_0702000.1	protein_coding	0	1	4	26	10	0	4	4	0	0	0	0	0	0	0	0	1	12
PVP01_0702100	PVP01_0702100	PVP01_0702100.1	protein_coding	0	0	0	25	10	0	3	0	0	0	0	0	0	0	0	0	0	12
PVP01_0702200	PVP01_0702200	PVP01_0702200.1	protein_coding	0	4	1	16	6	0	0	1	0	0	0	0	0	0	0	0	4	10
PVP01_0702300	PVP01_0702300	PVP01_0702300.1	protein_coding	0	0	0	11	4	0	1	0	0	0	0	0	0	0	0	0	0	6
PVP01_0702400	PVP01_0702400	PVP01_0702400.1	protein_coding	0	1	1	9	4	0	0	1	0	0	0	0	0	0	0	0	1	5
PVP01_0702500	PVP01_0702500	PVP01_0702500.1	protein_coding	0	2	2	13	4	0	2	2	0	0	0	0	0	0	0	0	2	7
PVP01_0702600	PVP01_0702600	PVP01_0702600.1	protein_coding	0	1	1	12	5	0	1	1	0	0	0	0	0	0	0	0	1	6
PVP01_0702700	PVP01_0702700	PVP01_0702700.1	protein_coding	0	4	7	15	8	0	3	7	0	0	0	1	0	0	0	0	3	5
PVP01_0702800	PVP01_0702800	PVP01_0702800.1	protein_coding	0	0	0	19	10	0	0	0	0	0	0	0	0	0	0	0	0	9
PVP01_0702900	PVP01_0702900	PVP01_0702900.1	protein_coding	0	0	0	22	14	0	0	0	0	0	0	0	0	0	0	0	0	8
PVP01_0703000	PVP01_0703000	PVP01_0703000.1	protein_coding	0	3	7	21	9	0	0	7	0	0	0	0	0	0	0	0	3	12
PVP01_0703100	PVP01_0703100	PVP01_0703100.1	protein_coding	0	0	1	16	9	0	0	1	0	0	0	0	0	0	0	0	0	7
PVP01_0703200	PVP01_0703200	PVP01_0703200.1	protein_coding	0	0	0	23	14	0	0	0	0	0	0	0	0	0	0	0	0	9
PVP01_0703300	PVP01_0703300	PVP01_0703300.1	protein_coding	0	2	7	16	6	0	4	7	0	0	0	0	0	0	0	0	2	6
PVP01_0703400	PVP01_0703400	PVP01_0703400.1	protein_coding	0	0	0	11	7	0	0	0	0	0	0	0	0	0	0	0	0	4
PVP01_0703500	PVP01_0703500	PVP01_0703500.1	protein_coding	0	5	2	16	6	0	0	2	0	0	0	0	0	0	0	0	5	10
PVP01_0703600	PVP01_0703600	PVP01_0703600.1	protein_coding	0	1	4	14	7	0	0	4	0	0	0	0	0	0	0	0	1	7
PVP01_0703700	PVP01_0703700	PVP01_0703700.1	protein_coding	0	10	19	26	8	0	0	19	0	0	0	0	0	0	0	0	10	18
PVP01_0703800	PVP01_0703800	PVP01_0703800.1	protein_coding	0	2	6	47	20	0	5	6	0	0	0	0	0	0	0	0	2	22
PVP01_0703900	PVP01_0703900	PVP01_0703900.1	protein_coding	0	0	0	32	9	0	0	0	0	0	0	0	0	0	0	0	0	23
PVP01_0704000	PVP01_0704000	PVP01_0704000.1	protein_coding	0	3	4	32	12	0	1	4	0	0	0	0	0	0	0	0	3	19
PVP01_0704100	PVP01_0704100	PVP01_0704100.1	protein_coding	0	0	1	34	11	0	3	1	0	0	0	0	0	0	0	0	0	20
PVP01_0704200	PVP01_0704200	PVP01_0704200.1	protein_coding	0	6	4	25	5	0	1	4	0	0	0	0	0	0	0	0	6	19
PVP01_0704300	PVP01_0704300	PVP01_0704300.1	protein_coding	0	0	1	29	14	0	0	1	0	0	0	0	0	0	0	0	0	15
PVP01_0704400	PVP01_0704400	PVP01_0704400.1	protein_coding	0	5	13	36	23	0	0	13	0	0	0	0	0	0	0	0	5	13
PVP01_0704500	PVP01_0704500	PVP01_0704500.1	protein_coding	0	4	15	21	15	0	0	15	0	0	0	0	0	0	0	0	4	6
PVP01_0704600	PVP01_0704600	PVP01_0704600.1	protein_coding	0	1	0	18	8	0	3	0	0	0	0	0	0	0	0	0	1	7
PVP01_0704700	PVP01_0704700	PVP01_0704700.1	protein_coding	0	1	1	19	7	0	0	1	0	0	0	0	0	0	0	0	1	12
PVP01_0704800	PVP01_0704800	PVP01_0704800.1	protein_coding	0	0	1	21	13	0	0	1	0	0	0	0	0	0	0	0	0	8
PVP01_0704900	PVP01_0704900	PVP01_0704900.1	protein_coding	0	3	5	19	10	0	0	5	0	0	0	0	0	0	0	0	3	9
PVP01_0705000	PVP01_0705000	PVP01_0705000.1	protein_coding	0	0	2	22	11	0	0	2	0	0	0	0	0	0	0	0	0	11
PVP01_0705100	PVP01_0705100	PVP01_0705100.1	protein_coding	0	3	4	12	9	0	0	4	0	0	0	0	0	0	0	0	3	3
PVP01_0705200	PVP01_0705200	PVP01_0705200.1	protein_coding	0	1	4	26	10	0	0	4	0	0	0	0	0	0	0	0	1	16
PVP01_0705300	PVP01_0705300	PVP01_0705300.1	protein_coding	0	0	0	30	14	0	0	0	0	0	0	0	0	0	0	0	0	16
PVP01_0705400	PVP01_0705400	PVP01_0705400.1	protein_coding	0	0	1	28	12	0	0	1	0	0	0	0	0	0	0	0	0	16
PVP01_0705500	PVP01_0705500	PVP01_0705500.1	protein_coding	0	0	0	28	11	0	0	0	0	0	0	0	0	0	0	0	0	17
PVP01_0705600	PVP01_0705600	PVP01_0705600.1	protein_coding	0	1	7	26	14	0	0	7	0	0	0	0	0	0	0	0	1	12
PVP01_0705700	PVP01_0705700	PVP01_0705700.1	protein_coding	0	4	3	24	12	0	0	3	0	0	0	0	0	0	0	0	4	12
PVP01_0705800	PVP01_0705800	PVP01_0705800.1	protein_coding	0	0	0	20	11	0	0	0	0	0	0	0	0	0	0	0	0	9
PVP01_0705900	PVP01_0705900	PVP01_0705900.1	protein_coding	0	0	0	21	16	0	0	0	0	0	0	0	0	0	0	0	0	5
PVP01_0706000	PVP01_0706000	PVP01_0706000.1	protein_coding	0	0	0	13	0	0	2	0	0	0	0	0	0	0	0	0	0	11
PVP01_0706100	PVP01_0706100	PVP01_0706100.1	protein_coding	0	5	1	16	8	0	1	1	0	0	0	0	0	0	0	0	5	7
PVP01_0706200	PVP01_0706200	PVP01_0706200.1	protein_coding	0	0	0	21	12	0	0	0	0	0	0	0	0	0	0	0	0	9
PVP01_0706300	PVP01_0706300	PVP01_0706300.1	protein_coding	0	0	0	22	13	0	0	0	0	0	0	0	0	0	0	0	0	9
PVP01_0706400	PVP01_0706400	PVP01_0706400.1	protein_coding	0	0	1	22	8	0	1	1	0	0	0	0	0	0	0	0	0	13
PVP01_0706500	PVP01_0706500	PVP01_0706500.1	protein_coding	0	0	3	25	9	0	2	3	0	0	0	0	0	0	0	0	0	14
PVP01_0706600	PVP01_0706600	PVP01_0706600.1	protein_coding	0	1	4	23	12	0	0	4	0	0	0	0	0	0	0	0	1	11
PVP01_0706700	PVP01_0706700	PVP01_0706700.1	protein_coding	0	2	6	26	9	0	5	6	0	0	0	0	0	0	0	0	2	12
PVP01_0706800	PVP01_0706800	PVP01_0706800.1	protein_coding	0	1	0	24	11	0	2	0	0	0	0	0	0	0	0	0	1	11
PVP01_0706900	PVP01_0706900	PVP01_0706900.1	protein_coding	0	1	0	26	14	0	0	0	0	0	0	0	0	0	0	0	1	12
PVP01_0707000	PVP01_0707000	PVP01_0707000.1	protein_coding	0	7	8	29	11	0	6	8	0	0	0	0	0	0	0	0	7	12
PVP01_0707100	PVP01_0707100	PVP01_0707100.1	protein_coding	0	2	2	17	8	0	0	2	0	0	0	0	0	0	0	0	2	9
PVP01_0707200	PVP01_0707200	PVP01_0707200.1	protein_coding	0	0	1	21	11	0	3	1	0	0	0	0	0	0	0	0	0	7
PVP01_0707300	PVP01_0707300	PVP01_0707300.1	protein_coding	0	2	0	18	5	0	2	0	0	0	0	0	0	0	0	0	2	11
PVP01_0707400	PVP01_0707400	PVP01_0707400.1	protein_coding	0	0	2	21	11	0	0	2	0	0	0	0	0	0	0	0	0	10
PVP01_0707500	PVP01_0707500	PVP01_0707500.1	protein_coding	0	0	6	19	7	0	1	6	0	0	0	0	0	0	0	0	0	11
PVP01_0707600	PVP01_0707600	PVP01_0707600.1	protein_coding	0	3	2	22	10	0	0	2	0	0	0	0	0	0	0	0	3	12
PVP01_0707700	PVP01_0707700	PVP01_0707700.1	protein_coding	0	1	0	25	15	0	1	0	0	0	0	0	0	0	0	0	1	9
PVP01_0707800	PVP01_0707800	PVP01_0707800.1	protein_coding	0	1	0	21	11	0	3	0	0	0	0	0	0	0	0	0	1	7
PVP01_0707900	PVP01_0707900	PVP01_0707900.1	protein_coding	0	8	3	22	13	0	0	3	0	0	0	0	0	0	0	0	8	9
PVP01_0708000	PVP01_0708000	PVP01_0708000.1	protein_coding	0	6	2	30	17	0	0	2	0	0	0	0	0	0	0	0	6	13
PVP01_0708100	PVP01_0708100	PVP01_0708100.1	protein_coding	0	2	3	26	13	0	1	3	0	0	0	0	0	0	0	0	2	12
PVP01_0708200	PVP01_0708200	PVP01_0708200.1	protein_coding	0	7	5	22	13	0	0	5	0	0	0	0	0	0	0	0	7	9
PVP01_0708300	PVP01_0708300	PVP01_0708300.1	protein_coding	0	0	0	33	11	0	1	0	0	0	0	0	0	0	0	0	0	21
PVP01_0708400	PVP01_0708400	PVP01_0708400.1	protein_coding	0	2	3	27	8	0	0	3	0	0	0	0	0	0	0	0	2	19
PVP01_0708500	PVP01_0708500	PVP01_0708500.1	protein_coding	0	2	3	25	7	0	0	3	0	0	0	0	0	0	0	0	2	18
PVP01_0708600	PVP01_0708600	PVP01_0708600.1	protein_coding	0	5	1	32	9	0	9	1	0	0	0	0	0	0	0	0	5	14
PVP01_0708700	PVP01_0708700	PVP01_0708700.1	protein_coding	0	5	7	30	16	0	0	7	0	0	0	0	0	0	0	0	5	14
PVP01_0708800	PVP01_0708800	PVP01_0708800.1	protein_coding	1	2	5	14	7	0	0	5	0	0	0	0	0	1	0	0	2	7
PVP01_0708900	PVP01_0708900	PVP01_0708900.1	protein_coding	0	0	4	26	16	0	0	4	0	0	0	0	0	0	0	0	0	10
PVP01_0709000	PVP01_0709000	PVP01_0709000.1	protein_coding	0	1	7	22	10	0	0	7	0	0	0	0	0	0	0	0	1	12
PVP01_0709100	PVP01_0709100	PVP01_0709100.1	protein_coding	0	1	0	21	5	0	5	0	0	0	0	0	0	0	0	0	1	11
PVP01_0709200	PVP01_0709200	PVP01_0709200.1	protein_coding	0	1	1	19	5	0	0	1	0	0	0	0	0	0	0	0	1	14
PVP01_0709300	PVP01_0709300	PVP01_0709300.1	protein_coding	0	0	0	17	8	0	0	0	0	0	0	0	0	0	0	0	0	9
PVP01_0709400	PVP01_0709400	PVP01_0709400.1	protein_coding	0	1	1	12	5	0	0	1	0	0	0	0	0	0	0	0	1	7
PVP01_0709500	PVP01_0709500	PVP01_0709500.1	protein_coding	0	0	0	17	7	0	3	0	0	0	0	0	0	0	0	0	0	7
PVP01_0709600	PVP01_0709600	PVP01_0709600.1	protein_coding	0	0	6	15	11	0	0	6	0	0	0	0	0	0	0	0	0	4
PVP01_0709700	PVP01_0709700	PVP01_0709700.1	protein_coding	0	0	0	31	23	0	0	0	0	0	0	0	0	0	0	0	0	8
PVP01_0709800	PVP01_0709800	PVP01_0709800.1	protein_coding	0	3	28	11	4	0	0	28	0	0	0	0	0	0	0	0	3	7
PVP01_0709900	PVP01_0709900	PVP01_0709900.1	protein_coding	0	1	1	16	5	0	0	1	0	0	0	0	0	0	0	0	1	11
PVP01_0710000	PVP01_0710000	PVP01_0710000.1	protein_coding	0	0	1	17	6	0	0	1	0	0	0	0	0	0	0	0	0	11
PVP01_0710100	PVP01_0710100	PVP01_0710100.1	protein_coding	0	1	1	18	7	0	0	1	0	0	0	0	0	0	0	0	1	11
PVP01_0710200	PVP01_0710200	PVP01_0710200.1	protein_coding	0	0	4	21	12	0	0	4	0	0	0	0	0	0	0	0	0	9
PVP01_0710300	PVP01_0710300	PVP01_0710300.1	protein_coding	0	1	0	21	8	0	0	0	0	0	0	0	0	0	0	0	1	13
PVP01_0710400	PVP01_0710400	PVP01_0710400.1	protein_coding	0	0	3	25	8	0	2	3	0	0	0	0	0	0	0	0	0	15
PVP01_0710500	PVP01_0710500	PVP01_0710500.1	protein_coding	0	6	3	26	13	0	0	3	0	0	0	0	0	0	0	0	6	13
PVP01_0710600	PVP01_0710600	PVP01_0710600.1	protein_coding	0	1	2	24	9	0	0	2	0	0	0	0	0	0	0	0	1	15
PVP01_0710700	PVP01_0710700	PVP01_0710700.1	protein_coding	0	2	3	22	11	0	0	3	0	0	0	1	0	0	0	1	1	11
PVP01_0710800	PVP01_0710800	PVP01_0710800.1	protein_coding	0	1	1	27	16	0	1	1	0	0	0	0	0	0	0	0	1	10
PVP01_0710900	PVP01_0710900	PVP01_0710900.1	protein_coding	0	0	0	26	11	0	6	0	0	0	0	0	0	0	0	0	0	9
PVP01_0711000	PVP01_0711000	PVP01_0711000.1	protein_coding	0	1	8	32	21	0	1	8	0	0	0	0	0	0	0	0	1	10
PVP01_0711100	PVP01_0711100	PVP01_0711100.1	protein_coding	0	0	0	32	21	0	0	0	0	0	0	0	0	0	0	0	0	11
PVP01_0711200	PVP01_0711200	PVP01_0711200.1	protein_coding	0	8	8	19	11	0	0	8	0	0	0	0	0	0	0	0	8	8
PVP01_0711300	PVP01_0711300	PVP01_0711300.1	protein_coding	0	1	0	27	6	0	0	0	0	0	0	0	0	0	0	0	1	21
PVP01_0711400	PVP01_0711400	PVP01_0711400.1	protein_coding	0	0	1	26	20	0	1	1	0	0	0	0	0	0	0	0	0	5
PVP01_0711500	PVP01_0711500	PVP01_0711500.1	protein_coding	0	0	0	22	8	0	0	0	0	0	0	0	0	0	0	0	0	14
PVP01_0711600	PVP01_0711600	PVP01_0711600.1	protein_coding	0	1	0	24	18	0	0	0	0	0	0	0	0	0	0	0	1	6
PVP01_0711700	PVP01_0711700	PVP01_0711700.1	protein_coding	0	2	9	15	6	0	0	9	0	0	0	0	0	0	0	0	2	9
PVP01_0711800	PVP01_0711800	PVP01_0711800.1	protein_coding	0	0	1	23	17	0	0	1	0	0	0	0	0	0	0	0	0	6
PVP01_0711900	PVP01_0711900	PVP01_0711900.1	protein_coding	0	0	2	22	16	0	0	2	0	0	0	0	0	0	0	0	0	6
PVP01_0712000	PVP01_0712000	PVP01_0712000.1	protein_coding	0	2	1	27	18	0	0	1	0	0	0	0	0	0	0	0	2	9
PVP01_0712100	PVP01_0712100	PVP01_0712100.1	protein_coding	0	4	0	27	21	0	0	0	0	0	0	0	0	0	0	0	4	6
PVP01_0712200	PVP01_0712200	PVP01_0712200.1	protein_coding	0	0	0	33	15	0	0	0	0	0	0	0	0	0	0	0	0	18
PVP01_0712300	PVP01_0712300	PVP01_0712300.1	protein_coding	0	0	2	41	22	0	0	2	0	0	0	0	0	0	0	0	0	19
PVP01_0712400	PVP01_0712400	PVP01_0712400.1	protein_coding	0	3	6	26	12	0	0	6	0	0	0	0	0	0	0	0	3	14
PVP01_0712500	PVP01_0712500	PVP01_0712500.1	protein_coding	0	5	5	31	14	0	0	5	0	0	0	0	0	0	0	0	5	17
PVP01_0712600	PVP01_0712600	PVP01_0712600.1	protein_coding	0	2	0	34	17	0	4	0	0	0	0	0	0	0	0	0	2	13
PVP01_0712700	PVP01_0712700	PVP01_0712700.1	protein_coding	0	1	4	35	18	0	0	4	0	0	0	0	0	0	0	0	1	17
PVP01_0712800	PVP01_0712800	PVP01_0712800.1	protein_coding	0	0	0	42	20	0	12	0	0	0	0	0	0	0	0	0	0	10
PVP01_0712900	PVP01_0712900	PVP01_0712900.1	protein_coding	0	3	14	41	21	0	2	14	0	0	0	0	0	0	0	0	3	18
PVP01_0713000	PVP01_0713000	PVP01_0713000.1	protein_coding	0	0	0	33	18	0	0	0	0	0	0	0	0	0	0	0	0	15
PVP01_0713100	PVP01_0713100	PVP01_0713100.1	protein_coding	0	1	1	36	18	0	0	1	0	0	0	0	0	0	0	0	1	18
PVP01_0713200	PVP01_0713200	PVP01_0713200.1	protein_coding	0	0	0	30	14	0	0	0	0	0	0	0	0	0	0	0	0	16
PVP01_0713300	PVP01_0713300	PVP01_0713300.1	protein_coding	0	0	5	42	23	0	0	5	0	0	0	0	0	0	0	0	0	19
PVP01_0713400	PVP01_0713400	PVP01_0713400.1	protein_coding	0	4	8	37	13	0	0	8	0	0	0	0	0	0	0	0	4	24
PVP01_0713500	PVP01_0713500	PVP01_0713500.1	protein_coding	0	0	0	49	23	0	2	0	0	0	0	0	0	0	0	0	0	24
PVP01_0713600	PVP01_0713600	PVP01_0713600.1	protein_coding	0	0	1	37	11	0	0	1	0	0	0	0	0	0	0	0	0	26
PVP01_0713700	PVP01_0713700	PVP01_0713700.1	protein_coding	0	2	1	36	25	0	0	1	0	0	0	0	0	0	0	0	2	11
PVP01_0713800	PVP01_0713800	PVP01_0713800.1	protein_coding	0	5	5	18	7	0	0	5	0	0	0	0	0	0	0	0	5	11
PVP01_0713900	PVP01_0713900	PVP01_0713900.1	protein_coding	0	0	4	30	21	0	0	4	0	0	0	0	0	0	0	0	0	9
PVP01_0714000	PVP01_0714000	PVP01_0714000.1	protein_coding	0	0	0	29	16	0	0	0	0	0	0	0	0	0	0	0	0	13
PVP01_0714100	PVP01_0714100	PVP01_0714100.1	protein_coding	0	1	2	25	17	0	0	2	0	0	0	0	0	0	0	0	1	8
PVP01_0714200	PVP01_0714200	PVP01_0714200.1	protein_coding	0	0	1	29	7	0	0	1	0	0	0	0	0	0	0	0	0	22
PVP01_0714300	PVP01_0714300	PVP01_0714300.1	protein_coding	0	0	0	24	8	0	0	0	0	0	0	0	0	0	0	0	0	16
PVP01_0714400	PVP01_0714400	PVP01_0714400.1	protein_coding	0	4	7	18	8	0	2	7	0	0	0	0	0	0	0	0	4	8
PVP01_0714500	PVP01_0714500	PVP01_0714500.1	protein_coding	0	0	0	34	17	0	0	0	0	0	0	0	0	0	0	0	0	17
PVP01_0714600	PVP01_0714600	PVP01_0714600.1	protein_coding	0	6	9	13	9	0	0	9	0	0	0	0	0	0	0	0	6	4
PVP01_0714700	PVP01_0714700	PVP01_0714700.1	protein_coding	0	1	1	33	17	0	1	1	0	0	0	1	0	0	0	0	0	16
PVP01_0714800	PVP01_0714800	PVP01_0714800.1	protein_coding	0	7	13	25	16	0	0	13	0	0	0	0	0	0	0	0	7	9
PVP01_0714900	PVP01_0714900	PVP01_0714900.1	protein_coding	0	2	0	35	19	0	6	0	0	0	0	0	0	0	0	0	2	10
PVP01_0715000	PVP01_0715000	PVP01_0715000.1	protein_coding	0	2	0	29	19	0	0	0	0	0	0	0	0	0	0	0	2	10
PVP01_0715100	PVP01_0715100	PVP01_0715100.1	protein_coding	0	1	0	25	10	0	0	0	0	0	0	0	0	0	0	0	1	15
PVP01_0715200	PVP01_0715200	PVP01_0715200.1	protein_coding	0	0	0	34	17	0	0	0	0	0	0	0	0	0	0	0	0	17
PVP01_0715300	PVP01_0715300	PVP01_0715300.1	protein_coding	0	1	2	32	15	0	0	2	0	0	0	0	0	0	0	0	1	17
PVP01_0715400	PVP01_0715400	PVP01_0715400.1	protein_coding	0	11	13	42	17	0	0	13	0	0	0	0	0	0	0	0	11	25
PVP01_0715500	PVP01_0715500	PVP01_0715500.1	protein_coding	0	2	4	49	24	0	0	4	0	0	0	0	0	0	0	0	2	25
PVP01_0715600	PVP01_0715600	PVP01_0715600.1	protein_coding	0	2	4	41	11	0	10	4	0	0	0	0	0	0	0	0	2	20
PVP01_0715700	PVP01_0715700	PVP01_0715700.1	protein_coding	0	0	2	34	10	0	0	2	0	0	0	0	0	0	0	0	0	24
PVP01_0715800	PVP01_0715800	PVP01_0715800.1	protein_coding	0	3	5	35	10	0	0	5	0	0	0	0	0	0	0	0	3	25
PVP01_0715900	PVP01_0715900	PVP01_0715900.1	protein_coding	0	5	1	17	9	0	0	1	0	0	0	0	0	0	0	0	5	8
PVP01_0716000	PVP01_0716000	PVP01_0716000.1	protein_coding	0	1	1	20	11	0	0	1	0	0	0	0	0	0	0	0	1	9
PVP01_0716100	PVP01_0716100	PVP01_0716100.1	protein_coding	0	0	0	27	16	0	0	0	0	0	0	0	0	0	0	0	0	11
PVP01_0716200	PVP01_0716200	PVP01_0716200.1	protein_coding	0	0	1	25	15	0	0	1	0	0	0	0	0	0	0	0	0	10
PVP01_0716300	PVP01_0716300	PVP01_0716300.1	protein_coding	0	2	0	30	14	0	1	0	0	0	0	0	0	0	0	0	2	15
PVP01_0716400	PVP01_0716400	PVP01_0716400.1	protein_coding	0	2	1	25	11	0	0	1	0	0	0	0	0	0	0	0	2	14
PVP01_0716500	PVP01_0716500	PVP01_0716500.1	protein_coding	0	1	1	25	9	0	2	1	0	0	0	1	0	0	0	0	1	14
PVP01_0716600	PVP01_0716600	PVP01_0716600.1	protein_coding	0	0	0	24	12	0	4	0	0	0	0	0	0	0	0	0	0	8
PVP01_0716700	PVP01_0716700	PVP01_0716700.1	protein_coding	0	2	0	24	10	0	0	0	0	0	0	0	0	0	0	0	2	14
PVP01_0716800	PVP01_0716800	PVP01_0716800.1	protein_coding	0	7	8	18	12	0	1	8	0	0	0	0	0	0	0	0	7	5
PVP01_0716900	PVP01_0716900	PVP01_0716900.1	lincRNA	0	0	0	23	10	0	0	0	5	0	0	0	0	0	0	0	0	8
PVP01_0717000	PVP01_0717000	PVP01_0717000.1	protein_coding	0	3	1	40	30	0	0	1	0	0	0	0	0	0	0	0	3	10
PVP01_0717100	PVP01_0717100	PVP01_0717100.1	protein_coding	0	0	6	41	13	0	1	6	0	0	0	0	0	0	0	0	0	27
PVP01_0717200	PVP01_0717200	PVP01_0717200.1	protein_coding	0	0	1	44	30	0	0	1	0	0	0	0	0	0	0	0	0	14
PVP01_0717300	PVP01_0717300	PVP01_0717300.1	protein_coding	0	3	4	26	12	0	0	4	0	0	0	0	0	0	0	0	3	14
PVP01_0717400	PVP01_0717400	PVP01_0717400.1	protein_coding	0	2	0	34	11	0	1	0	0	0	0	0	0	0	0	0	2	22
PVP01_0717500	PVP01_0717500	PVP01_0717500.1	protein_coding	0	1	1	37	13	0	2	1	0	0	0	0	0	0	0	0	1	22
PVP01_0717600	PVP01_0717600	PVP01_0717600.1	protein_coding	0	0	0	43	21	0	2	0	0	0	0	0	0	0	0	0	0	20
PVP01_0717700	PVP01_0717700	PVP01_0717700.1	protein_coding	0	1	1	31	11	0	2	1	0	0	0	0	0	0	0	0	1	18
PVP01_0717800	PVP01_0717800	PVP01_0717800.1	protein_coding	0	2	0	27	9	0	0	0	0	0	0	0	0	0	0	0	2	18
PVP01_0717900	PVP01_0717900	PVP01_0717900.1	protein_coding	0	1	2	20	6	0	0	2	0	0	0	0	0	0	0	0	1	14
PVP01_0718000	PVP01_0718000	PVP01_0718000.1	protein_coding	0	1	0	22	14	0	0	0	0	0	0	0	0	0	0	0	1	8
PVP01_0718100	PVP01_0718100	PVP01_0718100.1	protein_coding	0	1	0	17	10	0	0	0	0	0	0	0	0	0	0	0	1	7
PVP01_0718200	PVP01_0718200	PVP01_0718200.1	protein_coding	0	5	4	27	6	0	0	4	0	0	0	0	0	0	0	0	5	21
PVP01_0718300	PVP01_0718300	PVP01_0718300.1	protein_coding	0	10	19	20	12	0	0	19	0	0	0	0	0	0	0	0	10	8
PVP01_0718400	PVP01_0718400	PVP01_0718400.1	protein_coding	0	1	2	20	13	0	0	2	0	0	0	0	0	0	0	0	1	7
PVP01_0718500	PVP01_0718500	PVP01_0718500.1	protein_coding	0	2	1	25	8	0	6	1	0	0	0	0	0	0	0	0	2	11
PVP01_0718600	PVP01_0718600	PVP01_0718600.1	protein_coding	0	1	2	25	13	0	0	2	0	0	0	0	0	0	0	0	1	12
PVP01_0718700	PVP01_0718700	PVP01_0718700.1	protein_coding	0	0	0	26	14	0	1	0	0	0	0	0	0	0	0	0	0	11
PVP01_0718800	PVP01_0718800	PVP01_0718800.1	protein_coding	0	7	17	32	20	0	0	17	0	0	0	0	0	0	0	0	7	12
PVP01_0718900	PVP01_0718900	PVP01_0718900.1	protein_coding	0	0	0	49	14	0	4	0	0	0	0	0	0	0	0	0	0	31
PVP01_0719000	PVP01_0719000	PVP01_0719000.1	protein_coding	0	3	2	39	10	0	0	2	0	0	0	0	0	0	0	0	3	29
PVP01_0719100	PVP01_0719100	PVP01_0719100.1	protein_coding	0	1	1	21	13	0	0	1	0	0	0	0	0	0	0	0	1	8
PVP01_0719200	PVP01_0719200	PVP01_0719200.1	protein_coding	0	2	0	21	10	0	0	0	0	0	0	0	0	0	0	0	2	11
PVP01_0719300	PVP01_0719300	PVP01_0719300.1	protein_coding	0	1	2	28	16	0	1	2	0	0	0	0	0	0	0	0	1	11
PVP01_0719400	PVP01_0719400	PVP01_0719400.1	protein_coding	0	1	0	30	11	0	2	0	0	0	0	1	0	0	0	0	0	18
PVP01_0719500	PVP01_0719500	PVP01_0719500.1	protein_coding	0	5	6	24	10	0	2	6	0	0	0	0	0	0	0	0	5	12
PVP01_0719600	PVP01_0719600	PVP01_0719600.1	protein_coding	0	0	3	33	14	0	0	3	0	0	0	0	0	0	0	0	0	19
PVP01_0719700	PVP01_0719700	PVP01_0719700.1	protein_coding	0	7	7	30	17	0	2	7	0	0	0	0	0	0	0	0	7	11
PVP01_0719800	PVP01_0719800	PVP01_0719800.1	protein_coding	0	3	2	16	6	0	0	2	0	0	0	0	0	0	0	0	3	10
PVP01_0719900	PVP01_0719900	PVP01_0719900.1	protein_coding	0	0	2	15	9	0	0	2	0	0	0	0	0	0	0	0	0	6
PVP01_0720000	PVP01_0720000	PVP01_0720000.1	protein_coding	0	0	2	18	7	0	0	2	0	0	0	0	0	0	0	0	0	11
PVP01_0720100	PVP01_0720100	PVP01_0720100.1	protein_coding	0	7	5	31	23	0	1	5	0	0	0	0	0	0	0	0	7	7
PVP01_0720200	PVP01_0720200	PVP01_0720200.1	protein_coding	0	2	11	29	14	0	4	11	0	0	0	0	0	0	0	0	2	11
PVP01_0720300	PVP01_0720300	PVP01_0720300.1	protein_coding	0	1	1	43	26	0	1	1	0	0	0	0	0	0	0	0	1	16
PVP01_0720400	PVP01_0720400	PVP01_0720400.1	protein_coding	0	0	1	36	16	0	0	1	0	0	0	0	0	0	0	0	0	20
PVP01_0720500	PVP01_0720500	PVP01_0720500.1	protein_coding	0	3	3	25	9	0	5	3	0	0	0	0	0	0	0	0	3	11
PVP01_0720600	PVP01_0720600	PVP01_0720600.1	protein_coding	0	2	4	35	19	0	5	4	0	0	0	2	0	0	0	0	0	13
PVP01_0720700	PVP01_0720700	PVP01_0720700.1	protein_coding	0	2	0	35	22	0	0	0	0	0	0	0	0	0	0	0	2	13
PVP01_0720800	PVP01_0720800	PVP01_0720800.1	protein_coding	0	2	2	42	18	0	6	2	0	0	0	0	0	0	0	0	2	18
PVP01_0720900	PVP01_0720900	PVP01_0720900.1	protein_coding	0	2	10	46	22	0	0	10	0	0	0	0	0	0	0	0	2	24
PVP01_0721000	PVP01_0721000	PVP01_0721000.1	protein_coding	0	3	0	37	17	0	0	0	0	0	0	0	0	0	0	0	3	20
PVP01_0721100	PVP01_0721100	PVP01_0721100.1	protein_coding	0	1	1	33	9	0	2	1	0	0	0	1	0	0	0	1	0	22
PVP01_0721200	PVP01_0721200	PVP01_0721200.1	protein_coding	0	0	0	29	19	0	2	0	0	0	0	0	0	0	0	0	0	8
PVP01_0721300	PVP01_0721300	PVP01_0721300.1	protein_coding	0	11	14	20	10	0	0	14	0	0	0	0	0	0	0	0	11	10
PVP01_0721400	PVP01_0721400	PVP01_0721400.1	protein_coding	0	0	0	23	12	0	0	0	0	0	0	0	0	0	0	0	0	11
PVP01_0721500	PVP01_0721500	PVP01_0721500.1	protein_coding	0	2	0	18	10	0	0	0	0	0	0	0	0	0	0	0	2	8
PVP01_0721600	PVP01_0721600	PVP01_0721600.1	protein_coding	0	0	0	18	8	0	0	0	0	0	0	0	0	0	0	0	0	10
PVP01_0721700	PVP01_0721700	PVP01_0721700.1	protein_coding	0	0	1	23	12	0	0	1	0	0	0	0	0	0	0	0	0	11
PVP01_0721800	PVP01_0721800	PVP01_0721800.1	protein_coding	0	0	3	27	19	0	0	3	0	0	0	0	0	0	0	0	0	8
PVP01_0721900	PVP01_0721900	PVP01_0721900.1	protein_coding	0	5	7	38	27	0	0	7	0	0	0	0	0	0	0	0	5	11
PVP01_0722000	PVP01_0722000	PVP01_0722000.1	protein_coding	0	3	1	38	10	0	2	1	0	0	0	1	0	0	0	0	2	27
PVP01_0722100	PVP01_0722100	PVP01_0722100.1	protein_coding	0	2	0	42	15	0	0	0	0	0	0	0	0	0	0	0	2	27
PVP01_0722200	PVP01_0722200	PVP01_0722200.1	protein_coding	0	0	3	26	10	0	0	3	0	0	0	0	0	0	0	0	0	16
PVP01_0722300	PVP01_0722300	PVP01_0722300.1	protein_coding	0	0	5	26	12	0	0	5	0	0	0	0	0	0	0	0	0	14
PVP01_0722400	PVP01_0722400	PVP01_0722400.1	protein_coding	0	0	0	30	14	0	3	0	0	0	0	0	0	0	0	0	0	13
PVP01_0722500	PVP01_0722500	PVP01_0722500.1	protein_coding	0	5	3	24	13	0	1	3	0	0	0	1	0	0	0	0	4	11
PVP01_0722600	PVP01_0722600	PVP01_0722600.1	protein_coding	0	1	1	28	13	0	0	1	0	0	0	0	0	0	0	0	1	15
PVP01_0722700	PVP01_0722700	PVP01_0722700.1	protein_coding	0	5	4	27	16	0	0	4	0	0	0	0	0	0	0	0	5	11
PVP01_0722800	PVP01_0722800	PVP01_0722800.1	protein_coding	0	0	2	35	13	0	0	2	0	0	0	0	0	0	0	0	0	22
PVP01_0722900	PVP01_0722900	PVP01_0722900.1	protein_coding	0	3	6	48	29	0	3	6	0	0	0	0	0	0	0	0	3	16
PVP01_0723000	PVP01_0723000	PVP01_0723000.1	protein_coding	0	10	6	40	21	0	7	6	0	0	0	0	0	0	0	0	10	12
PVP01_0723100	PVP01_0723100	PVP01_0723100.1	protein_coding	0	2	8	33	12	0	0	8	0	0	0	0	0	0	0	0	2	21
PVP01_0723200	PVP01_0723200	PVP01_0723200.1	protein_coding	0	3	2	24	14	0	0	2	0	0	0	0	0	0	0	0	3	10
PVP01_0723300	PVP01_0723300	PVP01_0723300.1	protein_coding	0	0	0	26	14	0	0	0	0	0	0	0	0	0	0	0	0	12
PVP01_0723400	PVP01_0723400	PVP01_0723400.1	protein_coding	0	1	0	30	11	0	8	0	0	0	0	0	0	0	0	0	1	11
PVP01_0723500	PVP01_0723500	PVP01_0723500.1	protein_coding	0	0	2	24	10	0	0	2	0	0	0	0	0	0	0	0	0	14
PVP01_0723600	PVP01_0723600	PVP01_0723600.1	protein_coding	0	1	4	26	15	0	0	4	0	0	0	0	0	0	0	0	1	11
PVP01_0723700	PVP01_0723700	PVP01_0723700.1	protein_coding	0	1	2	31	18	0	1	2	0	0	0	0	0	0	0	0	1	12
PVP01_0723800	PVP01_0723800	PVP01_0723800.1	protein_coding	0	3	5	32	11	0	0	5	0	0	0	0	0	0	0	0	3	21
PVP01_0723900	PVP01_0723900	PVP01_0723900.1	protein_coding	0	4	1	39	18	0	1	1	0	0	0	0	0	0	0	0	4	20
PVP01_0724000	PVP01_0724000	PVP01_0724000.1	protein_coding	0	1	0	41	17	0	3	0	0	0	0	0	0	0	0	0	1	21
PVP01_0724100	PVP01_0724100	PVP01_0724100.1	protein_coding	0	0	0	40	19	0	1	0	0	0	0	0	0	0	0	0	0	20
PVP01_0724200	PVP01_0724200	PVP01_0724200.1	protein_coding	0	1	0	32	20	0	0	0	0	0	0	0	0	0	0	0	1	12
PVP01_0724300	PVP01_0724300	PVP01_0724300.1	protein_coding	0	3	4	36	17	0	0	4	0	0	0	0	0	0	0	0	3	19
PVP01_0724400	PVP01_0724400	PVP01_0724400.1	protein_coding	0	0	0	27	9	0	1	0	0	0	0	0	0	0	0	0	0	17
PVP01_0724500	PVP01_0724500	PVP01_0724500.1	protein_coding	0	1	4	39	21	0	1	4	0	0	0	0	0	0	0	0	1	17
PVP01_0724600	PVP01_0724600	PVP01_0724600.1	protein_coding	2	11	25	24	10	0	0	25	0	0	0	0	0	2	0	0	11	14
PVP01_0724700	PVP01_0724700	PVP01_0724700.1	protein_coding	0	0	0	26	11	0	0	0	0	0	0	0	0	0	0	0	0	15
PVP01_0724800	PVP01_0724800	PVP01_0724800.1	protein_coding	0	1	1	43	13	0	11	1	0	0	0	0	0	0	0	0	1	19
PVP01_0724900	PVP01_0724900	PVP01_0724900.1	protein_coding	0	1	1	39	14	0	2	1	0	0	0	0	0	0	0	0	1	23
PVP01_0725000	PVP01_0725000	PVP01_0725000.1	protein_coding	0	6	12	21	13	0	0	12	0	0	0	0	0	0	0	0	6	8
PVP01_0725100	PVP01_0725100	PVP01_0725100.1	protein_coding	0	4	1	28	17	0	0	1	0	0	0	0	0	0	0	0	4	11
PVP01_0725200	PVP01_0725200	PVP01_0725200.1	protein_coding	0	3	4	33	24	0	0	4	0	0	0	0	0	0	0	0	3	9
PVP01_0725300	PVP01_0725300	PVP01_0725300.1	protein_coding	0	5	8	28	10	0	0	8	0	0	0	0	0	0	0	0	5	18
PVP01_0725400	PVP01_0725400	PVP01_0725400.1	protein_coding	0	1	2	49	17	0	7	2	0	0	0	0	0	0	0	0	1	25
PVP01_0725500	PVP01_0725500	PVP01_0725500.1	protein_coding	0	0	0	48	25	0	1	0	0	0	0	0	0	0	0	0	0	22
PVP01_0725600	PVP01_0725600	PVP01_0725600.1	protein_coding	0	0	0	48	22	0	0	0	0	0	0	0	0	0	0	0	0	26
PVP01_0725700	PVP01_0725700	PVP01_0725700.1	protein_coding	0	7	6	44	10	0	8	6	0	0	0	1	0	0	0	0	6	27
PVP01_0725800	PVP01_0725800	PVP01_0725800.1	protein_coding	0	2	0	28	11	0	0	0	0	0	0	0	0	0	0	0	2	17
PVP01_0725900	PVP01_0725900	PVP01_0725900.1	protein_coding	0	2	4	27	10	0	1	4	0	0	0	0	0	0	0	0	2	16
PVP01_0726000	PVP01_0726000	PVP01_0726000.1	protein_coding	0	0	1	42	10	0	1	1	0	0	0	0	0	0	0	0	0	31
PVP01_0726100	PVP01_0726100	PVP01_0726100.1	protein_coding	0	4	20	18	7	0	0	20	0	0	0	0	0	0	0	0	4	11
PVP01_0726200	PVP01_0726200	PVP01_0726200.1	protein_coding	0	0	0	39	31	0	0	0	0	0	0	0	0	0	0	0	0	8
PVP01_0726300	PVP01_0726300	PVP01_0726300.1	protein_coding	0	1	1	43	15	0	0	1	0	0	0	0	0	0	0	0	1	28
PVP01_0726400	PVP01_0726400	PVP01_0726400.1	protein_coding	0	1	0	30	8	0	0	0	0	0	0	0	0	0	0	0	1	22
PVP01_0726500	PVP01_0726500	PVP01_0726500.1	protein_coding	0	1	0	35	15	0	5	0	0	0	0	0	0	0	0	0	1	15
PVP01_0726600	PVP01_0726600	PVP01_0726600.1	protein_coding	0	0	1	45	22	0	1	1	0	0	0	0	0	0	0	0	0	22
PVP01_0726650	PVP01_0726650	PVP01_0726650.1	protein_coding	0	2	2	48	32	0	0	2	0	0	0	0	0	0	0	0	2	16
PVP01_0726700	PVP01_0726700	PVP01_0726700.1	protein_coding	0	0	3	56	21	0	2	3	0	0	0	0	0	0	0	0	0	33
PVP01_0726800	PVP01_0726800	PVP01_0726800.1	protein_coding	0	0	1	53	11	0	8	1	0	0	0	0	0	0	0	0	0	34
PVP01_0726900	PVP01_0726900	PVP01_0726900.1	protein_coding	0	1	0	48	17	0	0	0	0	0	0	0	0	0	0	0	1	31
PVP01_0727000	PVP01_0727000	PVP01_0727000.1	protein_coding	0	0	2	40	24	0	1	2	0	0	0	1	0	0	0	0	0	15
PVP01_0727100	PVP01_0727100	PVP01_0727100.1	protein_coding	0	0	0	26	11	0	0	0	0	0	0	0	0	0	0	0	0	15
PVP01_0727200	PVP01_0727200	PVP01_0727200.1	protein_coding	2	5	17	39	17	0	0	17	0	0	0	0	0	2	0	0	5	22
PVP01_0727300	PVP01_0727300	PVP01_0727300.1	protein_coding	0	4	7	35	10	0	0	7	0	0	0	0	0	0	0	0	4	25
PVP01_0727400	PVP01_0727400	PVP01_0727400.1	protein_coding	0	1	1	33	11	0	0	1	0	0	0	0	0	0	0	0	1	22
PVP01_0727500	PVP01_0727500	PVP01_0727500.1	protein_coding	0	4	2	29	10	0	0	2	0	0	0	0	0	0	0	0	4	19
PVP01_0727600	PVP01_0727600	PVP01_0727600.1	protein_coding	0	2	3	31	21	0	1	3	0	0	0	1	0	0	0	0	1	10
PVP01_0727700	PVP01_0727700	PVP01_0727700.1	protein_coding	0	0	0	36	11	0	12	0	0	0	0	0	0	0	0	0	0	13
PVP01_0727800	PVP01_0727800	PVP01_0727800.1	protein_coding	0	0	2	42	18	0	0	2	0	0	0	0	0	0	0	0	0	24
PVP01_0727900	PVP01_0727900	PVP01_0727900.1	protein_coding	0	2	5	28	6	0	11	5	0	0	0	0	0	0	0	0	2	11
PVP01_0728000	PVP01_0728000	PVP01_0728000.1	protein_coding	0	0	1	22	16	0	0	1	0	0	0	0	0	0	0	0	0	6
PVP01_0728100	PVP01_0728100	PVP01_0728100.1	protein_coding	0	1	0	14	8	0	0	0	0	0	0	0	0	0	0	0	1	6
PVP01_0728200	PVP01_0728200	PVP01_0728200.1	protein_coding	0	0	0	20	7	0	0	0	0	0	0	0	0	0	0	0	0	13
PVP01_0728300	PVP01_0728300	PVP01_0728300.1	protein_coding	0	0	0	19	6	0	0	0	0	0	0	0	0	0	0	0	0	13
PVP01_0728400	PVP01_0728400	PVP01_0728400.1	protein_coding	0	2	0	19	13	0	1	0	0	0	0	1	0	0	0	0	1	6
PVP01_0728500	PVP01_0728500	PVP01_0728500.1	protein_coding	0	3	3	18	9	0	0	3	0	0	0	0	0	0	0	0	3	9
PVP01_0728600	PVP01_0728600	PVP01_0728600.1	protein_coding	0	4	4	26	13	0	0	4	0	0	0	0	0	0	0	0	4	13
PVP01_0728700	PVP01_0728700	PVP01_0728700.1	protein_coding	0	1	1	27	11	0	6	1	0	0	0	0	0	0	0	0	1	10
PVP01_0728800	PVP01_0728800	PVP01_0728800.1	protein_coding	0	2	6	80	67	0	0	6	0	0	0	0	0	0	0	0	2	13
PVP01_0728900	PVP01_0728900	PVP01_0728900.1	protein_coding	0	50	98	14	6	0	0	98	0	0	0	0	0	0	0	0	50	8
PVP01_0729000	PVP01_0729000	PVP01_0729000.1	protein_coding	0	2	3	117	10	0	1	3	0	0	0	0	0	0	0	0	2	106
PVP01_0729100	PVP01_0729100	PVP01_0729100.1	protein_coding	0	2	7	22	7	0	0	7	0	0	0	0	0	0	0	0	2	15
PVP01_0729200	PVP01_0729200	PVP01_0729200.1	protein_coding	0	1	0	32	20	0	0	0	0	0	0	0	0	0	0	0	1	12
PVP01_0729300	PVP01_0729300	PVP01_0729300.1	protein_coding	0	1	2	22	6	0	0	2	0	0	0	0	0	0	0	0	1	16
PVP01_0729400	PVP01_0729400	PVP01_0729400.1	protein_coding	0	5	11	23	10	0	1	11	0	0	0	0	0	0	0	0	5	12
PVP01_0729500	PVP01_0729500	PVP01_0729500.1	protein_coding	0	1	1	8	4	0	0	1	0	0	0	0	0	0	0	0	1	4
PVP01_0729600	PVP01_0729600	PVP01_0729600.1	protein_coding	0	0	0	9	5	0	0	0	0	0	0	0	0	0	0	0	0	4
PVP01_0729700	PVP01_0729700	PVP01_0729700.1	protein_coding	0	2	0	13	5	0	0	0	0	0	0	0	0	0	0	0	2	8
PVP01_0729800	PVP01_0729800	PVP01_0729800.1	protein_coding	0	2	3	21	15	0	0	3	0	0	0	0	0	0	0	0	2	6
PVP01_0729900	PVP01_0729900	PVP01_0729900.1	protein_coding	0	1	2	20	12	0	0	2	0	0	0	0	0	0	0	0	1	8
PVP01_0730000	PVP01_0730000	PVP01_0730000.1	protein_coding	1	1	8	16	8	0	0	8	0	0	0	0	0	1	0	0	1	8
PVP01_0730100	PVP01_0730100	PVP01_0730100.1	protein_coding	0	0	0	25	12	0	1	0	0	0	0	0	0	0	0	0	0	12
PVP01_0730200	PVP01_0730200	PVP01_0730200.1	protein_coding	0	1	0	26	14	0	3	0	0	0	0	0	0	0	0	0	1	9
PVP01_0730300	PVP01_0730300	PVP01_0730300.1	protein_coding	0	0	0	18	6	0	1	0	0	0	0	0	0	0	0	0	0	11
PVP01_0730400	PVP01_0730400	PVP01_0730400.1	protein_coding	0	1	1	18	8	0	1	1	0	0	0	1	0	0	0	0	0	10
PVP01_0730500	PVP01_0730500	PVP01_0730500.1	protein_coding	0	1	0	15	6	0	0	0	0	0	0	0	0	0	0	0	1	9
PVP01_0730600	PVP01_0730600	PVP01_0730600.1	protein_coding	0	0	0	30	6	0	0	0	0	0	0	0	0	0	0	0	0	24
PVP01_0730700	PVP01_0730700	PVP01_0730700.1	protein_coding	0	0	0	41	30	0	2	0	0	0	0	0	0	0	0	0	0	9
PVP01_0730800	PVP01_0730800	PVP01_0730800.1	protein_coding	0	1	5	54	22	0	11	5	0	0	0	0	0	0	0	0	1	21
PVP01_0730900	PVP01_0730900	PVP01_0730900.1	protein_coding	0	0	2	40	10	0	0	2	0	0	0	0	0	0	0	0	0	30
PVP01_0731000	PVP01_0731000	PVP01_0731000.1	protein_coding	0	2	0	31	21	0	0	0	0	0	0	0	0	0	0	0	2	10
PVP01_0731100	PVP01_0731100	PVP01_0731100.1	protein_coding	0	2	1	17	7	0	2	1	0	0	0	0	0	0	0	0	2	8
PVP01_0731200	PVP01_0731200	PVP01_0731200.1	protein_coding	0	0	0	27	10	0	4	0	0	0	0	0	0	0	0	0	0	13
PVP01_0731300	PVP01_0731300	PVP01_0731300.1	protein_coding	0	0	1	30	11	0	0	1	0	0	0	0	0	0	0	0	0	19
PVP01_0731400	PVP01_0731400	PVP01_0731400.1	protein_coding	0	1	5	28	8	0	0	5	0	0	0	0	0	0	0	0	1	20
PVP01_0731500	PVP01_0731500	PVP01_0731500.1	protein_coding	0	7	5	28	16	0	3	5	0	0	0	1	0	0	0	0	6	10
PVP01_0731600	PVP01_0731600	PVP01_0731600.1	protein_coding	0	0	1	19	13	0	0	1	0	0	0	0	0	0	0	0	0	6
PVP01_0731700	PVP01_0731700	PVP01_0731700.1	protein_coding	0	0	1	35	21	0	0	1	0	0	0	0	0	0	0	0	0	14
PVP01_0731800	PVP01_0731800	PVP01_0731800.1	protein_coding	0	3	1	31	23	0	3	1	0	0	0	0	0	0	0	0	3	5
PVP01_0731900	PVP01_0731900	PVP01_0731900.1	protein_coding	0	5	4	33	9	0	5	4	0	0	0	0	0	0	0	0	5	19
PVP01_0732000	PVP01_0732000	PVP01_0732000.1	protein_coding	0	3	6	37	11	0	0	6	0	0	0	0	0	0	0	0	3	26
PVP01_0732100	PVP01_0732100	PVP01_0732100.1	protein_coding	0	0	1	37	11	0	0	1	0	0	0	0	0	0	0	0	0	26
PVP01_0732200	PVP01_0732200	PVP01_0732200.1	protein_coding	0	5	6	24	19	0	0	6	0	0	0	0	0	0	0	0	5	5
PVP01_0732300	PVP01_0732300	PVP01_0732300.1	protein_coding	0	2	0	20	11	0	0	0	0	0	0	0	0	0	0	0	2	9
PVP01_0732400	PVP01_0732400	PVP01_0732400.1	protein_coding	0	1	0	21	10	0	0	0	0	0	0	0	0	0	0	0	1	11
PVP01_0732500	PVP01_0732500	PVP01_0732500.1	protein_coding	0	2	1	21	13	0	0	1	0	0	0	0	0	0	0	0	2	8
PVP01_0732600	PVP01_0732600	PVP01_0732600.1	protein_coding	0	0	5	21	9	0	0	5	0	0	0	0	0	0	0	0	0	12
PVP01_0732700	PVP01_0732700	PVP01_0732700.1	protein_coding	0	4	3	25	11	0	0	3	0	0	0	0	0	0	0	0	4	14
PVP01_0732800	PVP01_0732800	PVP01_0732800.1	protein_coding	0	2	6	22	11	0	0	6	0	0	0	0	0	0	0	0	2	11
PVP01_0732900	PVP01_0732900	PVP01_0732900.1	protein_coding	0	1	0	27	17	0	0	0	0	0	0	0	0	0	0	0	1	10
PVP01_0733000	PVP01_0733000	PVP01_0733000.1	protein_coding	0	0	0	26	11	0	0	0	0	0	0	0	0	0	0	0	0	15
PVP01_0733100	PVP01_0733100	PVP01_0733100.1	protein_coding	0	1	0	24	13	0	0	0	0	0	0	0	0	0	0	0	1	11
PVP01_0733200	PVP01_0733200	PVP01_0733200.1	protein_coding	0	0	0	27	10	0	2	0	0	0	0	0	0	0	0	0	0	15
PVP01_0733300	PVP01_0733300	PVP01_0733300.1	protein_coding	0	0	2	34	21	0	1	2	0	0	0	0	0	0	0	0	0	12
PVP01_0733400	PVP01_0733400	PVP01_0733400.1	protein_coding	0	0	4	35	17	0	3	4	0	0	0	0	0	0	0	0	0	15
PVP01_0733500	PVP01_0733500	PVP01_0733500.1	protein_coding	0	0	0	67	37	0	6	0	0	0	0	0	0	0	0	0	0	24
PVP01_0733600	PVP01_0733600	PVP01_0733600.1	protein_coding	0	4	5	55	17	0	6	5	0	0	0	0	0	0	0	0	4	32
PVP01_0733700	PVP01_0733700	PVP01_0733700.1	protein_coding	0	2	3	51	26	0	0	3	0	0	0	0	0	0	0	0	2	25
PVP01_0733800	PVP01_0733800	PVP01_0733800.1	protein_coding	0	0	0	51	30	0	0	0	0	0	0	0	0	0	0	0	0	21
PVP01_0733900	PVP01_0733900	PVP01_0733900.1	protein_coding	0	7	2	48	39	0	0	2	0	0	0	0	0	0	0	0	7	9
PVP01_0734000	PVP01_0734000	PVP01_0734000.1	protein_coding	0	0	0	36	12	0	2	0	0	0	0	0	0	0	0	0	0	22
PVP01_0734100	PVP01_0734100	PVP01_0734100.1	protein_coding	0	8	12	27	13	0	0	12	0	0	0	0	0	0	0	0	8	14
PVP01_0734200	PVP01_0734200	PVP01_0734200.1	protein_coding	0	2	1	71	52	0	3	1	0	0	0	0	0	0	0	0	2	16
PVP01_0734300	PVP01_0734300	PVP01_0734300.1	protein_coding	0	2	14	77	22	0	21	14	0	0	0	0	0	0	0	0	2	34
PVP01_0734400	PVP01_0734400	PVP01_0734400.1	protein_coding	0	0	2	56	29	0	0	2	0	0	0	0	0	0	0	0	0	27
PVP01_0734500	PVP01_0734500	PVP01_0734500.1	protein_coding	0	5	28	20	11	0	4	28	0	0	0	0	0	0	0	0	5	5
PVP01_0734600	PVP01_0734600	PVP01_0734600.1	protein_coding	0	0	1	27	14	0	0	1	0	0	0	0	0	0	0	0	0	13
PVP01_0734700	PVP01_0734700	PVP01_0734700.1	protein_coding	0	0	0	18	10	0	0	0	0	0	0	0	0	0	0	0	0	8
PVP01_0734800	PVP01_0734800	PVP01_0734800.1	protein_coding	0	0	1	20	11	0	0	1	0	0	0	0	0	0	0	0	0	9
PVP01_0734900	PVP01_0734900	PVP01_0734900.1	protein_coding	0	0	6	40	32	0	2	6	0	0	0	0	0	0	0	0	0	6
PVP01_0735000	PVP01_0735000	PVP01_0735000.1	protein_coding	0	2	10	48	20	0	1	10	0	0	0	0	0	0	0	0	2	27
PVP01_0735100	PVP01_0735100	PVP01_0735100.1	protein_coding	0	1	2	53	27	0	1	2	0	0	0	0	0	0	0	0	1	25
PVP01_0735200	PVP01_0735200	PVP01_0735200.1	protein_coding	0	7	15	54	22	0	1	15	0	0	0	0	0	0	0	0	7	31
PVP01_0735300	PVP01_0735300	PVP01_0735300.1	protein_coding	0	14	23	209	110	0	10	23	0	0	0	1	0	0	0	0	13	90
PVP01_0735400	PVP01_0735400	PVP01_0735400.1	protein_coding	0	0	4	116	92	0	0	4	0	0	0	0	0	0	0	0	0	24
PVP01_0735500	PVP01_0735500	PVP01_0735500.1	protein_coding	0	6	3	111	24	0	6	3	0	0	0	2	0	0	0	0	4	83
PVP01_0735600	PVP01_0735600	PVP01_0735600.1	protein_coding	0	0	0	56	1	0	0	0	0	0	0	0	0	0	0	0	0	55
PVP01_0735700	PVP01_0735700	PVP01_0735700.1	protein_coding	0	0	0	17	16	0	0	0	0	0	0	0	0	0	0	0	0	1
PVP01_0735800	PVP01_0735800	PVP01_0735800.1	protein_coding	0	4	5	36	30	0	5	5	0	0	0	2	0	0	0	0	2	3
PVP01_0735900	PVP01_0735900	PVP01_0735900.1	protein_coding	0	0	0	46	16	0	0	0	0	0	0	0	0	0	0	0	0	30
PVP01_0736000	PVP01_0736000	PVP01_0736000.1	protein_coding	0	0	0	63	35	0	0	0	0	0	0	0	0	0	0	0	0	28
PVP01_0736100	PVP01_0736100	PVP01_0736100.1	protein_coding	0	1	8	35	12	0	0	8	0	0	0	0	0	0	0	0	1	23
PVP01_0736200	PVP01_0736200	PVP01_0736200.1	protein_coding	0	0	0	50	34	0	0	0	0	0	0	0	0	0	0	0	0	16
PVP01_0736300	PVP01_0736300	PVP01_0736300.1	protein_coding	0	0	0	60	30	0	0	0	0	0	0	0	0	0	0	0	0	30
PVP01_0736400	PVP01_0736400	PVP01_0736400.1	protein_coding	0	2	9	72	58	0	0	9	0	0	0	0	0	0	0	0	2	14
PVP01_0736500	PVP01_0736500	PVP01_0736500.1	protein_coding	0	1	17	56	42	0	0	17	0	0	0	0	0	0	0	0	1	14
PVP01_0736600	PVP01_0736600	PVP01_0736600.1	protein_coding	0	0	1	56	44	0	0	1	0	0	0	0	0	0	0	0	0	12
PVP01_0736700	PVP01_0736700	PVP01_0736700.1	protein_coding	1	0	2	22	9	0	2	2	0	1	0	0	0	0	0	0	0	12
PVP01_0736800	PVP01_0736800	PVP01_0736800.1	protein_coding	0	0	0	22	17	0	0	0	0	0	0	0	0	0	0	0	0	5
PVP01_0736900	PVP01_0736900	PVP01_0736900.1	protein_coding	0	0	0	20	6	0	0	0	0	0	0	0	0	0	0	0	0	14
PVP01_0737000	PVP01_0737000	PVP01_0737000.1	protein_coding	1	2	9	4	0	0	0	9	0	0	0	0	0	1	0	0	2	4
PVP01_0737100	PVP01_0737100	PVP01_0737100.1	protein_coding	0	0	0	14	0	0	0	0	0	0	0	0	0	0	0	0	0	14
PVP01_0737300	PVP01_0737300	PVP01_0737300.1	protein_coding	0	0	0	2	2	0	0	0	0	0	0	0	0	0	0	0	0	0
PVP01_0737400	PVP01_0737400	PVP01_0737400.1	protein_coding	0	0	0	18	0	0	0	0	0	0	0	0	0	0	0	0	0	18
PVP01_0737500	PVP01_0737500	PVP01_0737500.1	protein_coding	0	2	4	18	11	0	0	4	0	0	0	0	0	0	0	0	2	7
PVP01_0737600	PVP01_0737600	PVP01_0737600.1	protein_coding	0	0	1	23	6	0	0	1	0	0	0	0	0	0	0	0	0	17
PVP01_0737700	PVP01_0737700	PVP01_0737700.1	protein_coding	0	0	4	14	0	0	1	4	0	0	0	0	0	0	0	0	0	13
PVP01_0737800	PVP01_0737800	PVP01_0737800.1	protein_coding	0	0	0	22	20	0	0	0	0	0	0	0	0	0	0	0	0	2
PVP01_0737900	PVP01_0737900	PVP01_0737900.1	protein_coding	0	1	2	32	15	0	1	2	0	0	0	0	0	0	0	0	1	16
PVP01_0738000	PVP01_0738000	PVP01_0738000.1	protein_coding	0	0	2	17	0	0	5	2	0	0	0	0	0	0	0	0	0	12
PVP01_0738100	PVP01_0738100	PVP01_0738100.1	protein_coding	0	0	0	7	7	0	0	0	0	0	0	0	0	0	0	0	0	0
PVP01_0738500	PVP01_0738500	PVP01_0738500.1	protein_coding	0	0	0	13	0	0	0	0	0	0	0	0	0	0	0	0	0	13
PVP01_0738600	PVP01_0738600	PVP01_0738600.1	protein_coding	0	0	4	14	9	0	0	4	0	0	0	0	0	0	0	0	0	5
PVP01_0738700	PVP01_0738700	PVP01_0738700.1	protein_coding	0	0	0	18	18	0	0	0	0	0	0	0	0	0	0	0	0	0
PVP01_0738900	PVP01_0738900	PVP01_0738900.1	protein_coding	0	0	0	1	0	0	0	0	0	0	0	0	0	0	0	0	0	1
PVP01_0739000	PVP01_0739000	PVP01_0739000.1	protein_coding	0	0	0	1	1	0	0	0	0	0	0	0	0	0	0	0	0	0
PVP01_0739100	PVP01_0739100	PVP01_0739100.1	protein_coding	0	0	0	5	0	0	0	0	0	0	0	0	0	0	0	0	0	5
PVP01_0739200	PVP01_0739200	PVP01_0739200.1	protein_coding	0	0	0	12	4	0	0	0	0	0	0	0	0	0	0	0	0	8
PVP01_0800100	PVP01_0800100	PVP01_0800100.1	protein_coding	0	20	39	100	16	0	1	39	0	0	0	1	0	0	0	0	19	84
PVP01_0800200	PVP01_0800200	PVP01_0800200.1	protein_coding	0	10	47	264	84	0	3	47	0	0	0	0	0	0	0	0	10	177
PVP01_0800300	PVP01_0800300	PVP01_0800300.1	protein_coding	0	18	49	184	156	0	10	49	0	0	0	2	0	0	0	0	16	20
PVP01_0800400	PVP01_0800400	PVP01_0800400.1	protein_coding	0	0	4	125	70	0	1	4	0	0	0	0	0	0	0	0	0	54
PVP01_0800500	PVP01_0800500	PVP01_0800500.1	protein_coding	0	7	9	183	35	0	8	9	0	0	0	0	0	0	0	0	7	140
PVP01_0800600	PVP01_0800600	PVP01_0800600.1	protein_coding	2	9	43	155	25	0	15	43	0	0	0	0	0	2	0	0	9	115
PVP01_0800700	PVP01_0800700	PVP01_0800700.1	protein_coding	0	6	36	72	10	0	0	36	0	0	0	0	0	0	0	0	6	62
PVP01_0800800	PVP01_0800800	PVP01_0800800.1	protein_coding	1	1	2	27	10	0	0	2	0	0	0	0	0	1	0	0	1	17
PVP01_0800900	PVP01_0800900	PVP01_0800900.1	protein_coding	0	1	3	23	9	0	6	3	0	0	0	1	0	0	0	0	0	9
PVP01_0801000	PVP01_0801000	PVP01_0801000.1	protein_coding	0	1	0	24	12	0	0	0	0	0	0	0	0	0	0	0	1	12
PVP01_0801100	PVP01_0801100	PVP01_0801100.1	protein_coding	0	0	9	21	11	0	0	9	0	0	0	0	0	0	0	0	0	10
PVP01_0801200	PVP01_0801200	PVP01_0801200.1	protein_coding	0	0	5	23	10	0	3	5	0	0	0	0	0	0	0	0	0	10
PVP01_0801300	PVP01_0801300	PVP01_0801300.1	protein_coding	0	0	1	25	11	0	0	1	0	0	0	0	0	0	0	0	0	14
PVP01_0801400	PVP01_0801400	PVP01_0801400.1	protein_coding	0	1	2	27	11	0	0	2	0	0	0	0	0	0	0	0	1	16
PVP01_0801500	PVP01_0801500	PVP01_0801500.1	protein_coding	0	0	4	36	16	0	0	4	0	0	0	0	0	0	0	0	0	20
PVP01_0801600	PVP01_0801600	PVP01_0801600.1	protein_coding	0	5	7	23	14	0	0	7	0	0	0	0	0	0	0	0	5	9
PVP01_0801700	PVP01_0801700	PVP01_0801700.1	protein_coding	0	1	3	39	29	0	1	3	0	0	0	0	0	0	0	0	1	9
PVP01_0801800	PVP01_0801800	PVP01_0801800.1	protein_coding	0	5	14	46	15	0	0	14	0	0	0	0	0	0	0	0	5	31
PVP01_0801900	PVP01_0801900	PVP01_0801900.1	rRNA	0	0	0	73	30	0	0	0	10	0	0	0	0	0	0	0	0	33
PVP01_0802000	PVP01_0802000	PVP01_0802000.1	rRNA	0	0	0	45	11	0	0	0	1	0	0	0	0	0	0	0	0	33
PVP01_0802100	PVP01_0802100	PVP01_0802100.1	protein_coding	1	0	2	43	10	0	0	2	0	0	0	0	0	1	0	0	0	33
PVP01_0802200	PVP01_0802200	PVP01_0802200.1	protein_coding	0	1	0	25	10	0	3	0	0	0	0	0	0	0	0	0	1	12
PVP01_0802300	PVP01_0802300	PVP01_0802300.1	protein_coding	0	1	0	26	10	0	2	0	0	0	0	1	0	0	0	0	0	15
PVP01_0802400	PVP01_0802400	PVP01_0802400.1	protein_coding	0	1	3	28	21	0	0	3	0	0	0	0	0	0	0	0	1	7
PVP01_0802500	PVP01_0802500	PVP01_0802500.1	protein_coding	0	0	15	39	28	0	0	15	0	0	0	0	0	0	0	0	0	11
PVP01_0802600	PVP01_0802600	PVP01_0802600.1	protein_coding	0	6	25	35	17	0	1	25	0	0	0	0	0	0	0	0	6	17
PVP01_0802700	PVP01_0802700	PVP01_0802700.1	protein_coding	0	1	0	31	13	0	7	0	0	0	0	0	0	0	0	0	1	11
PVP01_0802800	PVP01_0802800	PVP01_0802800.1	protein_coding	0	1	5	34	16	0	0	5	0	0	0	0	0	0	0	0	1	18
PVP01_0802900	PVP01_0802900	PVP01_0802900.1	protein_coding	0	0	0	26	14	0	4	0	0	0	0	0	0	0	0	0	0	8
PVP01_0803000	PVP01_0803000	PVP01_0803000.1	protein_coding	0	1	2	23	10	0	0	2	0	0	0	0	0	0	0	0	1	13
PVP01_0803100	PVP01_0803100	PVP01_0803100.1	protein_coding	0	0	0	30	18	0	0	0	0	0	0	0	0	0	0	0	0	12
PVP01_0803200	PVP01_0803200	PVP01_0803200.1	protein_coding	0	6	6	24	13	0	0	6	0	0	0	0	0	0	0	0	6	11
PVP01_0803300	PVP01_0803300	PVP01_0803300.1	protein_coding	0	0	0	25	11	0	1	0	0	0	0	0	0	0	0	0	0	13
PVP01_0803400	PVP01_0803400	PVP01_0803400.1	protein_coding	0	2	1	27	19	0	0	1	0	0	0	0	0	0	0	0	2	8
PVP01_0803500	PVP01_0803500	PVP01_0803500.1	protein_coding	0	11	5	23	9	0	0	5	0	0	0	0	0	0	0	0	11	14
PVP01_0803600	PVP01_0803600	PVP01_0803600.1	protein_coding	0	5	4	27	15	0	0	4	0	0	0	0	0	0	0	0	5	12
PVP01_0803700	PVP01_0803700	PVP01_0803700.1	protein_coding	0	1	1	18	4	0	2	1	0	0	0	0	0	0	0	0	1	12
PVP01_0803800	PVP01_0803800	PVP01_0803800.1	protein_coding	0	2	0	18	11	0	2	0	0	0	0	1	0	0	0	0	1	6
PVP01_0803900	PVP01_0803900	PVP01_0803900.1	protein_coding	0	11	25	23	4	0	1	25	0	0	0	0	0	0	0	0	11	18
PVP01_0804000	PVP01_0804000	PVP01_0804000.1	protein_coding	0	7	9	34	17	0	0	9	0	0	0	0	0	0	0	0	7	17
PVP01_0804100	PVP01_0804100	PVP01_0804100.1	protein_coding	0	2	3	36	22	0	0	3	0	0	0	0	0	0	0	0	2	14
PVP01_0804200	PVP01_0804200	PVP01_0804200.1	protein_coding	0	1	0	27	14	0	0	0	0	0	0	0	0	0	0	0	1	13
PVP01_0804300	PVP01_0804300	PVP01_0804300.1	protein_coding	0	3	5	24	11	0	1	5	0	0	0	0	0	0	0	0	3	12
PVP01_0804400	PVP01_0804400	PVP01_0804400.1	protein_coding	0	1	0	22	11	0	0	0	0	0	0	0	0	0	0	0	1	11
PVP01_0804500	PVP01_0804500	PVP01_0804500.1	protein_coding	0	2	2	17	7	0	3	2	0	0	0	1	0	0	0	0	1	8
PVP01_0804600	PVP01_0804600	PVP01_0804600.1	protein_coding	0	0	0	21	10	0	0	0	0	0	0	0	0	0	0	0	0	11
PVP01_0804700	PVP01_0804700	PVP01_0804700.1	protein_coding	0	0	1	28	12	0	0	1	0	0	0	0	0	0	0	0	0	16
PVP01_0804800	PVP01_0804800	PVP01_0804800.1	protein_coding	0	1	4	24	17	0	0	4	0	0	0	0	0	0	0	0	1	7
PVP01_0804900	PVP01_0804900	PVP01_0804900.1	protein_coding	0	0	0	29	11	0	4	0	0	0	0	0	0	0	0	0	0	14
PVP01_0805000	PVP01_0805000	PVP01_0805000.1	protein_coding	0	0	2	28	16	0	1	2	0	0	0	0	0	0	0	0	0	11
PVP01_0805100	PVP01_0805100	PVP01_0805100.1	protein_coding	0	0	0	28	15	0	2	0	0	0	0	0	0	0	0	0	0	11
PVP01_0805200	PVP01_0805200	PVP01_0805200.1	protein_coding	0	1	11	29	14	0	0	11	0	0	0	0	0	0	0	0	1	15
PVP01_0805300	PVP01_0805300	PVP01_0805300.1	protein_coding	0	1	2	33	23	0	0	2	0	0	0	0	0	0	0	0	1	10
PVP01_0805400	PVP01_0805400	PVP01_0805400.1	protein_coding	0	2	1	28	9	0	1	1	0	0	0	0	0	0	0	0	2	18
PVP01_0805500	PVP01_0805500	PVP01_0805500.1	protein_coding	0	1	1	29	11	0	2	1	0	0	0	0	0	0	0	0	1	16
PVP01_0805600	PVP01_0805600	PVP01_0805600.1	protein_coding	0	0	4	25	7	0	0	4	0	0	0	0	0	0	0	0	0	18
PVP01_0805700	PVP01_0805700	PVP01_0805700.1	protein_coding	0	2	1	22	17	0	1	1	0	0	0	0	0	0	0	0	2	4
PVP01_0805800	PVP01_0805800	PVP01_0805800.1	protein_coding	0	0	1	23	6	0	1	1	0	0	0	0	0	0	0	0	0	16
PVP01_0805900	PVP01_0805900	PVP01_0805900.1	protein_coding	0	0	0	25	10	0	2	0	0	0	0	0	0	0	0	0	0	13
PVP01_0806000	PVP01_0806000	PVP01_0806000.1	protein_coding	0	0	1	30	16	0	0	1	0	0	0	0	0	0	0	0	0	14
PVP01_0806100	PVP01_0806100	PVP01_0806100.1	protein_coding	0	5	5	18	13	0	0	5	0	0	0	0	0	0	0	0	5	5
PVP01_0806200	PVP01_0806200	PVP01_0806200.1	protein_coding	0	1	2	16	4	0	0	2	0	0	0	0	0	0	0	0	1	12
PVP01_0806300	PVP01_0806300	PVP01_0806300.1	protein_coding	0	0	0	23	14	0	0	0	0	0	0	0	0	0	0	0	0	9
PVP01_0806400	PVP01_0806400	PVP01_0806400.1	protein_coding	0	1	0	32	23	0	0	0	0	0	0	0	0	0	0	0	1	9
PVP01_0806500	PVP01_0806500	PVP01_0806500.1	protein_coding	0	3	0	31	10	0	12	0	0	0	0	0	0	0	0	0	3	9
PVP01_0806600	PVP01_0806600	PVP01_0806600.1	protein_coding	1	0	0	37	12	0	4	0	0	1	0	0	0	0	0	0	0	22
PVP01_0806700	PVP01_0806700	PVP01_0806700.1	protein_coding	0	1	1	25	11	0	3	1	0	0	0	0	0	0	0	0	1	11
PVP01_0806800	PVP01_0806800	PVP01_0806800.1	protein_coding	0	0	0	25	15	0	0	0	0	0	0	0	0	0	0	0	0	10
PVP01_0806900	PVP01_0806900	PVP01_0806900.1	protein_coding	0	0	4	22	12	0	2	4	0	0	0	0	0	0	0	0	0	8
PVP01_0807000	PVP01_0807000	PVP01_0807000.1	protein_coding	0	1	1	21	10	0	1	1	0	0	0	0	0	0	0	0	1	10
PVP01_0807100	PVP01_0807100	PVP01_0807100.1	protein_coding	0	0	1	31	19	0	0	1	0	0	0	0	0	0	0	0	0	12
PVP01_0807200	PVP01_0807200	PVP01_0807200.1	protein_coding	0	0	0	28	18	0	0	0	0	0	0	0	0	0	0	0	0	10
PVP01_0807300	PVP01_0807300	PVP01_0807300.1	protein_coding	0	0	0	31	21	0	0	0	0	0	0	0	0	0	0	0	0	10
PVP01_0807400	PVP01_0807400	PVP01_0807400.1	protein_coding	0	4	5	35	19	0	0	5	0	0	0	0	0	0	0	0	4	16
PVP01_0807500	PVP01_0807500	PVP01_0807500.1	protein_coding	0	1	10	27	16	0	0	10	0	0	0	0	0	0	0	0	1	11
PVP01_0807600	PVP01_0807600	PVP01_0807600.1	protein_coding	0	0	0	42	23	0	0	0	0	0	0	0	0	0	0	0	0	19
PVP01_0807700	PVP01_0807700	PVP01_0807700.1	protein_coding	0	6	10	42	19	0	0	10	0	0	0	0	0	0	0	0	6	23
PVP01_0807800	PVP01_0807800	PVP01_0807800.1	protein_coding	0	17	12	29	9	0	0	12	0	0	0	0	0	0	0	0	17	20
PVP01_0807900	PVP01_0807900	PVP01_0807900.1	protein_coding	0	0	1	26	19	0	0	1	0	0	0	0	0	0	0	0	0	7
PVP01_0808000	PVP01_0808000	PVP01_0808000.1	protein_coding	0	0	1	22	13	0	1	1	0	0	0	1	0	0	0	0	0	8
PVP01_0808100	PVP01_0808100	PVP01_0808100.1	protein_coding	0	3	0	16	5	0	0	0	0	0	0	0	0	0	0	0	3	11
PVP01_0808200	PVP01_0808200	PVP01_0808200.1	protein_coding	0	2	1	25	12	0	0	1	0	0	0	0	0	0	0	0	2	13
PVP01_0808300	PVP01_0808300	PVP01_0808300.1	protein_coding	0	2	1	16	5	0	0	1	0	0	0	0	0	0	0	0	2	11
PVP01_0808400	PVP01_0808400	PVP01_0808400.1	protein_coding	0	1	0	18	8	0	2	0	0	0	0	0	0	0	0	0	1	8
PVP01_0808500	PVP01_0808500	PVP01_0808500.1	protein_coding	0	0	1	20	10	0	0	1	0	0	0	0	0	0	0	0	0	10
PVP01_0808600	PVP01_0808600	PVP01_0808600.1	protein_coding	0	1	0	41	22	0	0	0	0	0	0	0	0	0	0	0	1	19
PVP01_0808700	PVP01_0808700	PVP01_0808700.1	protein_coding	0	0	6	31	15	0	0	6	0	0	0	0	0	0	0	0	0	16
PVP01_0808800	PVP01_0808800	PVP01_0808800.1	protein_coding	0	0	2	27	18	0	0	2	0	0	0	0	0	0	0	0	0	9
PVP01_0808900	PVP01_0808900	PVP01_0808900.1	protein_coding	0	0	0	20	11	0	0	0	0	0	0	0	0	0	0	0	0	9
PVP01_0809000	PVP01_0809000	PVP01_0809000.1	protein_coding	0	1	0	15	5	0	0	0	0	0	0	0	0	0	0	0	1	10
PVP01_0809100	PVP01_0809100	PVP01_0809100.1	protein_coding	1	0	1	13	5	0	0	1	0	0	0	0	0	1	0	0	0	8
PVP01_0809200	PVP01_0809200	PVP01_0809200.1	protein_coding	0	0	4	19	11	0	0	4	0	0	0	0	0	0	0	0	0	8
PVP01_0809300	PVP01_0809300	PVP01_0809300.1	protein_coding	0	1	0	23	7	0	0	0	0	0	0	0	0	0	0	0	1	16
PVP01_0809400	PVP01_0809400	PVP01_0809400.1	protein_coding	0	0	2	25	14	0	0	2	0	0	0	0	0	0	0	0	0	11
PVP01_0809500	PVP01_0809500	PVP01_0809500.1	protein_coding	0	0	0	27	13	0	4	0	0	0	0	0	0	0	0	0	0	10
PVP01_0809600	PVP01_0809600	PVP01_0809600.1	protein_coding	0	0	1	22	7	0	0	1	0	0	0	0	0	0	0	0	0	15
PVP01_0809700	PVP01_0809700	PVP01_0809700.1	protein_coding	0	0	0	20	10	0	0	0	0	0	0	0	0	0	0	0	0	10
PVP01_0809800	PVP01_0809800	PVP01_0809800.1	protein_coding	0	2	3	15	7	0	0	3	0	0	0	0	0	0	0	0	2	8
PVP01_0809900	PVP01_0809900	PVP01_0809900.1	protein_coding	0	8	10	16	6	0	0	10	0	0	0	0	0	0	0	0	8	10
PVP01_0810000	PVP01_0810000	PVP01_0810000.1	protein_coding	0	1	5	17	6	0	1	5	0	0	0	0	0	0	0	0	1	10
PVP01_0810100	PVP01_0810100	PVP01_0810100.1	protein_coding	0	0	0	19	12	0	1	0	0	0	0	0	0	0	0	0	0	6
PVP01_0810200	PVP01_0810200	PVP01_0810200.1	protein_coding	0	0	0	17	6	0	0	0	0	0	0	0	0	0	0	0	0	11
PVP01_0810300	PVP01_0810300	PVP01_0810300.1	protein_coding	0	3	5	18	8	0	0	5	0	0	0	0	0	0	0	0	3	10
PVP01_0810400	PVP01_0810400	PVP01_0810400.1	protein_coding	0	0	0	25	13	0	0	0	0	0	0	0	0	0	0	0	0	12
PVP01_0810500	PVP01_0810500	PVP01_0810500.1	protein_coding	0	3	2	24	10	0	1	2	0	0	0	0	0	0	0	0	3	13
PVP01_0810600	PVP01_0810600	PVP01_0810600.1	protein_coding	0	0	1	27	14	0	2	1	0	0	0	0	0	0	0	0	0	11
PVP01_0810700	PVP01_0810700	PVP01_0810700.1	protein_coding	0	0	0	33	15	0	0	0	0	0	0	0	0	0	0	0	0	18
PVP01_0810800	PVP01_0810800	PVP01_0810800.1	protein_coding	0	0	1	31	8	0	8	1	0	0	0	0	0	0	0	0	0	15
PVP01_0810900	PVP01_0810900	PVP01_0810900.1	protein_coding	0	1	1	23	16	0	0	1	0	0	0	0	0	0	0	0	1	7
PVP01_0811000	PVP01_0811000	PVP01_0811000.1	protein_coding	0	0	0	25	7	0	1	0	0	0	0	0	0	0	0	0	0	17
PVP01_0811100	PVP01_0811100	PVP01_0811100.1	protein_coding	0	0	0	24	15	0	2	0	0	0	0	0	0	0	0	0	0	7
PVP01_0811200	PVP01_0811200	PVP01_0811200.1	protein_coding	0	2	1	21	7	0	1	1	0	0	0	0	0	0	0	0	2	13
PVP01_0811300	PVP01_0811300	PVP01_0811300.1	protein_coding	0	0	0	24	10	0	0	0	0	0	0	0	0	0	0	0	0	14
PVP01_0811400	PVP01_0811400	PVP01_0811400.1	protein_coding	0	2	2	26	14	0	0	2	0	0	0	0	0	0	0	0	2	12
PVP01_0811500	PVP01_0811500	PVP01_0811500.1	protein_coding	0	0	0	29	10	0	0	0	0	0	0	0	0	0	0	0	0	19
[truncated: 3,608 more rows]

## Sheet: Table 2
N	Chromosome	Position	Reference	Variant	Impact
1	PvP01_01_v1	15225	A	T	High
2	PvP01_01_v1	19000	G	A	High
3	PvP01_01_v1	84253	C	A	High
4	PvP01_01_v1	93788	C	A	High
5	PvP01_01_v1	157448	G	A	High
6	PvP01_01_v1	600755	G	T	High
7	PvP01_01_v1	939461	G	T	High
8	PvP01_01_v1	972144	T	A	High
9	PvP01_01_v1	972163	T	G	High
10	PvP01_01_v1	972191	C	G	High
11	PvP01_01_v1	1008897	C	A	High
12	PvP01_02_v1	62477	T	A	High
13	PvP01_02_v1	89466	A	T	High
14	PvP01_02_v1	327616	A	T	High
15	PvP01_02_v1	508830	T	A	High
16	PvP01_02_v1	750937	A	T	High
17	PvP01_02_v1	785158	A	T	High
18	PvP01_03_v1	17834	G	T	High
19	PvP01_03_v1	30745	G	C	High
20	PvP01_03_v1	30746	T	G	High
21	PvP01_03_v1	55905	T	A	High
22	PvP01_03_v1	70437	A	T	High
23	PvP01_03_v1	77684	T	A	High
24	PvP01_03_v1	78748	A	C	High
25	PvP01_03_v1	791053	G	T	High
26	PvP01_04_v1	27243	T	G	High
27	PvP01_04_v1	84517	C	T	High
28	PvP01_04_v1	92948	A	T	High
29	PvP01_04_v1	180734	C	T	High
30	PvP01_04_v1	180848	A	T	High
31	PvP01_04_v1	212274	C	T	High
32	PvP01_04_v1	460582	T	A	High
33	PvP01_04_v1	523521	G	A	High
34	PvP01_04_v1	701343	C	A	High
35	PvP01_04_v1	715005	T	A	High
36	PvP01_04_v1	719218	T	G	High
37	PvP01_04_v1	742083	C	A	High
38	PvP01_04_v1	760550	A	G	High
39	PvP01_04_v1	804883	C	T	High
40	PvP01_04_v1	829750	A	T,*	High
41	PvP01_04_v1	830317	C	T	High
42	PvP01_04_v1	973179	C	T	High
43	PvP01_04_v1	984241	T	A	High
44	PvP01_04_v1	984243	G	A	High
45	PvP01_04_v1	984244	T	A	High
46	PvP01_04_v1	1011571	T	C	High
47	PvP01_04_v1	1011575	G	A	High
48	PvP01_04_v1	1011598	T	A	High
49	PvP01_05_v1	30655	G	A	High
50	PvP01_05_v1	37244	C	T	High
51	PvP01_05_v1	53813	A	G	High
52	PvP01_05_v1	87997	G	C	High
53	PvP01_05_v1	104739	C	T	High
54	PvP01_05_v1	139334	T	G	High
55	PvP01_05_v1	257840	C	A	High
56	PvP01_05_v1	470017	G	T	High
57	PvP01_05_v1	679046	C	T	High
58	PvP01_05_v1	960374	C	A	High
59	PvP01_05_v1	989785	G	A	High
60	PvP01_05_v1	990491	G	A	High
61	PvP01_05_v1	1425497	T	A	High
62	PvP01_05_v1	1473484	G	A	High
63	PvP01_05_v1	1480932	A	T	High
64	PvP01_06_v1	10913	C	A	High
65	PvP01_06_v1	24436	T	A	High
66	PvP01_06_v1	24523	T	A	High
67	PvP01_06_v1	29235	A	T	High
68	PvP01_06_v1	32107	G	*,T	High
69	PvP01_06_v1	49754	C	A	High
70	PvP01_06_v1	49922	A	C	High
71	PvP01_06_v1	50033	C	A	High
72	PvP01_06_v1	50150	A	T	High
73	PvP01_06_v1	819286	C	A	High
74	PvP01_06_v1	983363	A	T	High
75	PvP01_06_v1	1018906	G	A	High
76	PvP01_06_v1	1026504	G	T	High
77	PvP01_07_v1	4552	C	T,A	High
78	PvP01_07_v1	19448	T	C	High
79	PvP01_07_v1	19523	T	C	High
80	PvP01_07_v1	457486	T	A	High
81	PvP01_07_v1	1050162	C	T	High
82	PvP01_07_v1	1050163	C	T	High
83	PvP01_07_v1	1155643	G	T	High
84	PvP01_07_v1	1155939	C	A	High
85	PvP01_07_v1	1278948	C	A	High
86	PvP01_07_v1	1540374	C	T	High
87	PvP01_07_v1	1552461	C	G	High
88	PvP01_08_v1	29801	C	A	High
89	PvP01_08_v1	30018	C	T	High
90	PvP01_08_v1	46371	T	A	High
91	PvP01_08_v1	111974	C	T	High
92	PvP01_08_v1	289314	G	T	High
93	PvP01_08_v1	410988	C	G	High
94	PvP01_08_v1	757543	C	A	High
95	PvP01_08_v1	793637	C	A	High
96	PvP01_08_v1	959669	G	A	High
97	PvP01_08_v1	1302615	G	T	High
98	PvP01_08_v1	1382064	G	A	High
99	PvP01_08_v1	1430966	C	G	High
100	PvP01_08_v1	1465438	C	T	High
101	PvP01_08_v1	1554690	A	C	High
102	PvP01_08_v1	1632931	C	A	High
103	PvP01_09_v1	53181	A	T	High
104	PvP01_09_v1	65424	A	T	High
105	PvP01_09_v1	65503	T	C	High
106	PvP01_09_v1	224565	C	T,*	High
107	PvP01_09_v1	426450	G	A	High
108	PvP01_09_v1	853461	A	C	High
109	PvP01_09_v1	883973	C	G	High
110	PvP01_09_v1	989766	A	G	High
111	PvP01_09_v1	1793799	G	T	High
112	PvP01_09_v1	1876658	T	G	High
113	PvP01_09_v1	2055400	T	G	High
114	PvP01_09_v1	2202043	A	T	High
115	PvP01_09_v1	2218931	A	G	High
116	PvP01_09_v1	2233000	T	G	High
117	PvP01_09_v1	2235530	A	T	High
118	PvP01_09_v1	2235531	C	T	High
119	PvP01_10_v1	616112	C	A	High
120	PvP01_10_v1	1340456	G	T	High
121	PvP01_10_v1	1358447	A	C	High
122	PvP01_10_v1	1422397	C	A	High
123	PvP01_10_v1	1499060	G	T	High
124	PvP01_10_v1	1508109	T	A	High
125	PvP01_10_v1	1508127	T	A	High
126	PvP01_11_v1	55595	G	A	High
127	PvP01_11_v1	56070	T	C	High
128	PvP01_11_v1	75828	A	T	High
129	PvP01_11_v1	828210	G	A	High
130	PvP01_11_v1	1317510	C	T	High
131	PvP01_11_v1	1572936	G	*,A	High
132	PvP01_11_v1	1573008	G	C	High
133	PvP01_11_v1	2085573	T	A	High
134	PvP01_11_v1	2086320	C	A	High
135	PvP01_11_v1	2086866	G	T	High
136	PvP01_11_v1	2107068	T	A	High
137	PvP01_11_v1	2125515	A	T	High
138	PvP01_12_v1	6997	G	T	High
139	PvP01_12_v1	38746	C	T	High
140	PvP01_12_v1	43442	T	C	High
141	PvP01_12_v1	47268	C	A	High
142	PvP01_12_v1	48063	G	A	High
143	PvP01_12_v1	118494	C	T	High
144	PvP01_12_v1	424972	T	A	High
145	PvP01_12_v1	802101	G	T	High
146	PvP01_12_v1	964751	G	A	High
147	PvP01_12_v1	1041241	G	A	High
148	PvP01_12_v1	1235183	C	T	High
149	PvP01_12_v1	1899187	G	C	High
150	PvP01_12_v1	1939096	T	A	High
151	PvP01_12_v1	2458536	A	T	High
152	PvP01_12_v1	3043441	T	C	High
153	PvP01_12_v1	3058662	T	C	High
154	PvP01_12_v1	3063228	G	A	High
155	PvP01_12_v1	3063621	A	T	High
156	PvP01_12_v1	3116386	G	T	High
157	PvP01_13_v1	166581	G	T	High
158	PvP01_13_v1	166587	G	T	High
159	PvP01_13_v1	169378	A	T	High
160	PvP01_13_v1	444866	G	A	High
161	PvP01_13_v1	574191	T	A	High
162	PvP01_13_v1	1340792	A	T	High
163	PvP01_13_v1	1889599	C	A	High
164	PvP01_13_v1	2060947	G	T	High
165	PvP01_13_v1	2080440	T	C	High
166	PvP01_13_v1	2080592	A	T	High
167	PvP01_13_v1	2080675	T	A	High
168	PvP01_13_v1	2080942	T	A	High
169	PvP01_13_v1	2085521	G	T	High
170	PvP01_14_v1	10606	C	A	High
171	PvP01_14_v1	43289	T	A	High
172	PvP01_14_v1	125923	G	T	High
173	PvP01_14_v1	204341	G	T	High
174	PvP01_14_v1	349535	C	T	High
175	PvP01_14_v1	371070	C	A	High
176	PvP01_14_v1	501224	C	T	High
177	PvP01_14_v1	663713	G	C	High
178	PvP01_14_v1	815298	C	A	High
179	PvP01_14_v1	857559	C	T	High
180	PvP01_14_v1	1812583	G	A	High
181	PvP01_14_v1	2697210	C	T	High
182	PvP01_14_v1	2959028	G	T	High
183	PvP01_14_v1	2959982	T	A	High
184	PvP01_14_v1	3062669	T	A	High
185	PvP01_14_v1	3064571	C	A	High
186	PvP01_14_v1	3064952	A	C	High
187	PvP01_14_v1	3067731	T	C	High

## Sheet: Table 3
N	Chromosome	Position	Reference	variant	Impact
1	PvP01_01_v1	2992	G	T	Moderate
2	PvP01_01_v1	5319	C	T	Moderate
3	PvP01_01_v1	10409	A	G	Moderate
4	PvP01_01_v1	10438	G	T	Moderate
5	PvP01_01_v1	15341	C	T	Moderate
6	PvP01_01_v1	15343	A	G	Moderate
7	PvP01_01_v1	15999	T	A	Moderate
8	PvP01_01_v1	16018	A	G	Moderate
9	PvP01_01_v1	19504	A	T	Moderate
10	PvP01_01_v1	23058	G	A	Moderate
11	PvP01_01_v1	23257	G	A	Moderate
12	PvP01_01_v1	29571	G	A	Moderate
13	PvP01_01_v1	33028	G	C	Moderate
14	PvP01_01_v1	33770	C	T	Moderate
15	PvP01_01_v1	37468	A	G	Moderate
16	PvP01_01_v1	37931	A	T	Moderate
17	PvP01_01_v1	37941	T	C	Moderate
18	PvP01_01_v1	37955	A	T	Moderate
19	PvP01_01_v1	37956	A	T	Moderate
20	PvP01_01_v1	37960	G	T	Moderate
21	PvP01_01_v1	37985	C	T	Moderate
22	PvP01_01_v1	59259	T	G	Moderate
23	PvP01_01_v1	59283	T	G	Moderate
24	PvP01_01_v1	59392	A	C	Moderate
25	PvP01_01_v1	59394	T	C	Moderate
26	PvP01_01_v1	59398	T	A	Moderate
27	PvP01_01_v1	59435	T	C	Moderate
28	PvP01_01_v1	59444	T	C	Moderate
29	PvP01_01_v1	59466	T	C	Moderate
30	PvP01_01_v1	59498	G	C	Moderate
31	PvP01_01_v1	59511	T	C	Moderate
32	PvP01_01_v1	59518	A	T	Moderate
33	PvP01_01_v1	59547	C	T	Moderate
34	PvP01_01_v1	70676	G	C	Moderate
35	PvP01_01_v1	71212	C	T	Moderate
36	PvP01_01_v1	71231	A	T	Moderate
37	PvP01_01_v1	71232	T	C	Moderate
38	PvP01_01_v1	71240	T	A	Moderate
39	PvP01_01_v1	71245	T	C	Moderate
40	PvP01_01_v1	71256	T	C	Moderate
41	PvP01_01_v1	71262	C	G	Moderate
42	PvP01_01_v1	71277	T	G	Moderate
43	PvP01_01_v1	71281	T	G	Moderate
44	PvP01_01_v1	79490	T	C	Moderate
45	PvP01_01_v1	79502	G	A	Moderate
46	PvP01_01_v1	79878	T	G	Moderate
47	PvP01_01_v1	79889	A	G	Moderate
48	PvP01_01_v1	79891	G	T	Moderate
49	PvP01_01_v1	83105	G	A	Moderate
50	PvP01_01_v1	83119	T	C	Moderate
51	PvP01_01_v1	83122	G	T	Moderate
52	PvP01_01_v1	83133	G	T	Moderate
53	PvP01_01_v1	83134	T	G	Moderate
54	PvP01_01_v1	83165	T	A	Moderate
55	PvP01_01_v1	83180	C	T	Moderate
56	PvP01_01_v1	83187	T	G	Moderate
57	PvP01_01_v1	83192	T	C	Moderate
58	PvP01_01_v1	84242	A	T	Moderate
59	PvP01_01_v1	84252	T	G	Moderate
60	PvP01_01_v1	84259	C	T	Moderate
61	PvP01_01_v1	84261	G	T	Moderate
62	PvP01_01_v1	84605	G	T	Moderate
63	PvP01_01_v1	87222	A	G	Moderate
64	PvP01_01_v1	87544	T	C	Moderate
65	PvP01_01_v1	87652	C	T	Moderate
66	PvP01_01_v1	87660	T	G	Moderate
67	PvP01_01_v1	87670	A	G	Moderate
68	PvP01_01_v1	87677	C	A	Moderate
69	PvP01_01_v1	88620	A	T	Moderate
70	PvP01_01_v1	88637	G	T	Moderate
71	PvP01_01_v1	88684	G	T	Moderate
72	PvP01_01_v1	88688	T	G	Moderate
73	PvP01_01_v1	88763	C	T	Moderate
74	PvP01_01_v1	88771	T	G	Moderate
75	PvP01_01_v1	92483	A	G	Moderate
76	PvP01_01_v1	92520	C	T	Moderate
77	PvP01_01_v1	97579	C	A	Moderate
78	PvP01_01_v1	97580	A	G	Moderate
79	PvP01_01_v1	97645	T	G	Moderate
80	PvP01_01_v1	97652	G	A	Moderate
81	PvP01_01_v1	97655	A	T	Moderate
82	PvP01_01_v1	97663	A	C	Moderate
83	PvP01_01_v1	97674	C	A,*	Moderate
84	PvP01_01_v1	97675	A	T,*	Moderate
85	PvP01_01_v1	97682	G	T	Moderate
86	PvP01_01_v1	97694	G	A	Moderate
87	PvP01_01_v1	97698	G	A	Moderate
88	PvP01_01_v1	97739	C	T	Moderate
89	PvP01_01_v1	97778	T	C	Moderate
90	PvP01_01_v1	97779	A	T	Moderate
91	PvP01_01_v1	97788	T	G	Moderate
92	PvP01_01_v1	97790	C	T	Moderate
93	PvP01_01_v1	97795	A	C	Moderate
94	PvP01_01_v1	97806	T	C	Moderate
95	PvP01_01_v1	97839	C	T	Moderate
96	PvP01_01_v1	97845	T	C	Moderate
97	PvP01_01_v1	97880	C	T	Moderate
98	PvP01_01_v1	101234	C	T	Moderate
99	PvP01_01_v1	101567	C	A	Moderate
100	PvP01_01_v1	101671	C	T	Moderate
101	PvP01_01_v1	104370	G	C	Moderate
102	PvP01_01_v1	104812	C	T	Moderate
103	PvP01_01_v1	105807	A	G	Moderate
104	PvP01_01_v1	106012	C	T	Moderate
105	PvP01_01_v1	106138	T	C	Moderate
106	PvP01_01_v1	106153	T	C	Moderate
107	PvP01_01_v1	106370	T	A	Moderate
108	PvP01_01_v1	106855	T	C	Moderate
109	PvP01_01_v1	108952	A	G	Moderate
110	PvP01_01_v1	109226	G	A	Moderate
111	PvP01_01_v1	109236	C	T	Moderate
112	PvP01_01_v1	109251	C	T	Moderate
113	PvP01_01_v1	109256	C	A	Moderate
114	PvP01_01_v1	109261	A	C	Moderate
115	PvP01_01_v1	109344	A	C	Moderate
116	PvP01_01_v1	109356	G	A	Moderate
117	PvP01_01_v1	109363	G	C	Moderate
118	PvP01_01_v1	109370	G	A	Moderate
119	PvP01_01_v1	109454	G	A	Moderate
120	PvP01_01_v1	109461	G	A	Moderate
121	PvP01_01_v1	109472	G	A	Moderate
122	PvP01_01_v1	109474	T	A	Moderate
123	PvP01_01_v1	110296	C	A,*	Moderate
124	PvP01_01_v1	110304	T	A,*	Moderate
125	PvP01_01_v1	110307	T	C,*	Moderate
126	PvP01_01_v1	110331	C	T	Moderate
127	PvP01_01_v1	110338	C	A	Moderate
128	PvP01_01_v1	110520	A	G	Moderate
129	PvP01_01_v1	110568	G	C	Moderate
130	PvP01_01_v1	115725	C	G	Moderate
131	PvP01_01_v1	115783	T	A	Moderate
132	PvP01_01_v1	116316	C	A	Moderate
133	PvP01_01_v1	121493	C	A	Moderate
134	PvP01_01_v1	136028	A	T	Moderate
135	PvP01_01_v1	137153	A	T	Moderate
136	PvP01_01_v1	146032	G	A	Moderate
137	PvP01_01_v1	146033	G	A	Moderate
138	PvP01_01_v1	146813	G	C	Moderate
139	PvP01_01_v1	146882	T	C	Moderate
140	PvP01_01_v1	148061	A	T	Moderate
141	PvP01_01_v1	151295	T	C	Moderate
142	PvP01_01_v1	154114	T	G	Moderate
143	PvP01_01_v1	155341	T	G	Moderate
144	PvP01_01_v1	156292	A	G	Moderate
145	PvP01_01_v1	156813	G	C	Moderate
146	PvP01_01_v1	157446	T	A	Moderate
147	PvP01_01_v1	157466	A	G	Moderate
148	PvP01_01_v1	157484	G	A	Moderate
149	PvP01_01_v1	157493	G	A	Moderate
150	PvP01_01_v1	161576	T	C	Moderate
151	PvP01_01_v1	162042	C	T	Moderate
152	PvP01_01_v1	162491	G	A	Moderate
153	PvP01_01_v1	162507	T	G	Moderate
154	PvP01_01_v1	169130	T	G	Moderate
155	PvP01_01_v1	169875	G	A,*	Moderate
156	PvP01_01_v1	169887	C	G	Moderate
157	PvP01_01_v1	169902	G	C	Moderate
158	PvP01_01_v1	169956	C	T	Moderate
159	PvP01_01_v1	170331	A	*,G	Moderate
160	PvP01_01_v1	170333	G	A	Moderate
161	PvP01_01_v1	171710	A	G	Moderate
162	PvP01_01_v1	171735	C	G	Moderate
163	PvP01_01_v1	180643	A	T	Moderate
164	PvP01_01_v1	180652	C	T	Moderate
165	PvP01_01_v1	186039	C	T	Moderate
166	PvP01_01_v1	190501	C	A	Moderate
167	PvP01_01_v1	191745	C	T	Moderate
168	PvP01_01_v1	193308	C	G	Moderate
169	PvP01_01_v1	193356	C	T	Moderate
170	PvP01_01_v1	193866	C	T	Moderate
171	PvP01_01_v1	195111	C	T	Moderate
172	PvP01_01_v1	195681	C	G	Moderate
173	PvP01_01_v1	196148	C	T	Moderate
174	PvP01_01_v1	196538	A	G	Moderate
175	PvP01_01_v1	197853	C	G	Moderate
176	PvP01_01_v1	202375	T	C	Moderate
177	PvP01_01_v1	202980	A	T	Moderate
178	PvP01_01_v1	203179	G	A	Moderate
179	PvP01_01_v1	203591	T	A	Moderate
180	PvP01_01_v1	204720	C	A	Moderate
181	PvP01_01_v1	205999	G	C	Moderate
182	PvP01_01_v1	208604	G	A	Moderate
183	PvP01_01_v1	208606	A	T	Moderate
184	PvP01_01_v1	209456	G	A	Moderate
185	PvP01_01_v1	209461	A	T	Moderate
186	PvP01_01_v1	209668	T	C	Moderate
187	PvP01_01_v1	214019	C	T	Moderate
188	PvP01_01_v1	214283	A	G	Moderate
189	PvP01_01_v1	216013	C	A	Moderate
190	PvP01_01_v1	216110	C	T	Moderate
191	PvP01_01_v1	216656	C	T	Moderate
192	PvP01_01_v1	217114	A	C	Moderate
193	PvP01_01_v1	217273	T	C	Moderate
194	PvP01_01_v1	218233	C	T	Moderate
195	PvP01_01_v1	218415	T	A	Moderate
196	PvP01_01_v1	218453	C	T	Moderate
197	PvP01_01_v1	219143	A	G	Moderate
198	PvP01_01_v1	219455	T	G	Moderate
199	PvP01_01_v1	219829	T	C	Moderate
200	PvP01_01_v1	221005	G	A	Moderate
201	PvP01_01_v1	221412	G	T	Moderate
202	PvP01_01_v1	222023	T	C	Moderate
203	PvP01_01_v1	223844	C	G	Moderate
204	PvP01_01_v1	223990	G	A	Moderate
205	PvP01_01_v1	224017	A	C	Moderate
206	PvP01_01_v1	224031	C	A	Moderate
207	PvP01_01_v1	224049	A	C	Moderate
208	PvP01_01_v1	224055	A	C	Moderate
209	PvP01_01_v1	224056	G	C	Moderate
210	PvP01_01_v1	224065	A	C	Moderate
211	PvP01_01_v1	224073	C	A	Moderate
212	PvP01_01_v1	224080	C	G	Moderate
213	PvP01_01_v1	225405	A	C	Moderate
214	PvP01_01_v1	225499	A	C	Moderate
215	PvP01_01_v1	225500	T	C	Moderate
216	PvP01_01_v1	225566	T	G	Moderate
217	PvP01_01_v1	226113	G	C	Moderate
218	PvP01_01_v1	226191	C	T	Moderate
219	PvP01_01_v1	226593	G	A	Moderate
220	PvP01_01_v1	227861	A	G	Moderate
221	PvP01_01_v1	233666	C	A	Moderate
222	PvP01_01_v1	234626	A	C	Moderate
223	PvP01_01_v1	237200	G	A	Moderate
224	PvP01_01_v1	239782	A	C	Moderate
225	PvP01_01_v1	240719	C	T	Moderate
226	PvP01_01_v1	241811	C	G	Moderate
227	PvP01_01_v1	243558	T	G	Moderate
228	PvP01_01_v1	244971	A	G	Moderate
229	PvP01_01_v1	245029	C	T	Moderate
230	PvP01_01_v1	246176	T	G	Moderate
231	PvP01_01_v1	246318	A	G	Moderate
232	PvP01_01_v1	250770	C	T	Moderate
233	PvP01_01_v1	251160	T	C	Moderate
234	PvP01_01_v1	251185	G	T	Moderate
235	PvP01_01_v1	251229	G	A	Moderate
236	PvP01_01_v1	251337	C	T	Moderate
237	PvP01_01_v1	252014	T	G	Moderate
238	PvP01_01_v1	254430	C	T	Moderate
239	PvP01_01_v1	255342	C	T	Moderate
240	PvP01_01_v1	257039	C	T	Moderate
241	PvP01_01_v1	257934	T	A	Moderate
242	PvP01_01_v1	258303	T	C	Moderate
243	PvP01_01_v1	259212	T	C	Moderate
244	PvP01_01_v1	259514	A	G	Moderate
245	PvP01_01_v1	260738	T	G	Moderate
246	PvP01_01_v1	267460	G	C	Moderate
247	PvP01_01_v1	267689	A	T	Moderate
248	PvP01_01_v1	267701	G	A	Moderate
249	PvP01_01_v1	269935	C	T	Moderate
250	PvP01_01_v1	270214	G	A	Moderate
251	PvP01_01_v1	272259	C	T	Moderate
252	PvP01_01_v1	272389	A	G	Moderate
253	PvP01_01_v1	273223	T	C	Moderate
254	PvP01_01_v1	273598	C	T	Moderate
255	PvP01_01_v1	274053	C	T	Moderate
256	PvP01_01_v1	280387	A	G	Moderate
257	PvP01_01_v1	280388	C	A	Moderate
258	PvP01_01_v1	280444	T	C	Moderate
259	PvP01_01_v1	281677	C	T	Moderate
260	PvP01_01_v1	282302	T	C	Moderate
261	PvP01_01_v1	286429	A	C	Moderate
262	PvP01_01_v1	286731	C	G	Moderate
263	PvP01_01_v1	286945	A	G	Moderate
264	PvP01_01_v1	287017	C	G	Moderate
265	PvP01_01_v1	289748	C	T	Moderate
266	PvP01_01_v1	290268	G	C	Moderate
267	PvP01_01_v1	290391	G	T	Moderate
268	PvP01_01_v1	290452	C	G	Moderate
269	PvP01_01_v1	294633	A	G	Moderate
270	PvP01_01_v1	294838	C	T	Moderate
271	PvP01_01_v1	295707	A	G	Moderate
272	PvP01_01_v1	303684	C	A	Moderate
273	PvP01_01_v1	303726	C	T	Moderate
274	PvP01_01_v1	303985	T	G	Moderate
275	PvP01_01_v1	304387	C	T	Moderate
276	PvP01_01_v1	305248	A	T	Moderate
277	PvP01_01_v1	306412	C	A	Moderate
278	PvP01_01_v1	306600	T	C	Moderate
279	PvP01_01_v1	306648	G	C,*	Moderate
280	PvP01_01_v1	306663	G	C,*	Moderate
281	PvP01_01_v1	306949	T	C	Moderate
282	PvP01_01_v1	307111	C	T	Moderate
283	PvP01_01_v1	308596	C	A	Moderate
284	PvP01_01_v1	308938	A	C	Moderate
285	PvP01_01_v1	309149	A	C	Moderate
286	PvP01_01_v1	314761	T	A	Moderate
287	PvP01_01_v1	314830	T	C	Moderate
288	PvP01_01_v1	315402	T	G	Moderate
289	PvP01_01_v1	323957	T	G	Moderate
290	PvP01_01_v1	330262	T	C	Moderate
291	PvP01_01_v1	331212	T	A	Moderate
292	PvP01_01_v1	333037	T	C	Moderate
293	PvP01_01_v1	334465	T	C	Moderate
294	PvP01_01_v1	334705	G	A	Moderate
295	PvP01_01_v1	344567	G	A	Moderate
296	PvP01_01_v1	344723	G	T	Moderate
297	PvP01_01_v1	344768	T	G,*	Moderate
298	PvP01_01_v1	344771	T	C	Moderate
299	PvP01_01_v1	344963	G	A	Moderate
300	PvP01_01_v1	345910	A	T	Moderate
301	PvP01_01_v1	346142	T	A	Moderate
302	PvP01_01_v1	346247	C	T	Moderate
303	PvP01_01_v1	346250	G	A	Moderate
304	PvP01_01_v1	346429	A	C	Moderate
305	PvP01_01_v1	346487	A	G	Moderate
306	PvP01_01_v1	346560	T	C,*	Moderate
307	PvP01_01_v1	346575	T	*,C	Moderate
308	PvP01_01_v1	346589	A	G	Moderate
309	PvP01_01_v1	346604	G	A	Moderate
310	PvP01_01_v1	346619	G	A	Moderate
311	PvP01_01_v1	346661	T	G	Moderate
312	PvP01_01_v1	346928	G	C	Moderate
313	PvP01_01_v1	347162	C	G	Moderate
314	PvP01_01_v1	347690	A	T	Moderate
315	PvP01_01_v1	347702	T	A	Moderate
316	PvP01_01_v1	347717	T	*,C	Moderate
317	PvP01_01_v1	347733	C	T	Moderate
318	PvP01_01_v1	348353	G	A	Moderate
319	PvP01_01_v1	356330	T	A	Moderate
320	PvP01_01_v1	359057	A	G	Moderate
321	PvP01_01_v1	359085	G	A	Moderate
322	PvP01_01_v1	359174	G	T	Moderate
323	PvP01_01_v1	359895	C	T	Moderate
324	PvP01_01_v1	359943	A	G	Moderate
325	PvP01_01_v1	359962	A	G	Moderate
326	PvP01_01_v1	361069	G	T	Moderate
327	PvP01_01_v1	361572	C	T	Moderate
328	PvP01_01_v1	366289	T	G	Moderate
329	PvP01_01_v1	366497	C	G	Moderate
330	PvP01_01_v1	366736	G	T	Moderate
331	PvP01_01_v1	366738	T	C	Moderate
332	PvP01_01_v1	366742	C	T	Moderate
333	PvP01_01_v1	369019	G	A	Moderate
334	PvP01_01_v1	369868	T	C	Moderate
335	PvP01_01_v1	369871	C	T	Moderate
336	PvP01_01_v1	369873	G	A	Moderate
337	PvP01_01_v1	369876	G	A	Moderate
338	PvP01_01_v1	369877	T	C	Moderate
339	PvP01_01_v1	369879	G	T	Moderate
340	PvP01_01_v1	369883	T	C	Moderate
341	PvP01_01_v1	369898	T	C	Moderate
342	PvP01_01_v1	375799	G	A	Moderate
343	PvP01_01_v1	376582	G	A	Moderate
344	PvP01_01_v1	378054	G	C	Moderate
345	PvP01_01_v1	380972	C	A	Moderate
346	PvP01_01_v1	381317	A	C	Moderate
347	PvP01_01_v1	384854	T	G	Moderate
348	PvP01_01_v1	385961	A	G	Moderate
349	PvP01_01_v1	386231	G	T	Moderate
350	PvP01_01_v1	387028	G	A	Moderate
351	PvP01_01_v1	387212	C	G	Moderate
352	PvP01_01_v1	388122	C	G	Moderate
353	PvP01_01_v1	388163	C	A	Moderate
354	PvP01_01_v1	388350	T	C,G	Moderate
355	PvP01_01_v1	388395	G	T	Moderate
356	PvP01_01_v1	388517	T	C,G	Moderate
357	PvP01_01_v1	390036	G	A	Moderate
358	PvP01_01_v1	390085	T	A	Moderate
359	PvP01_01_v1	395063	A	G,*	Moderate
360	PvP01_01_v1	395145	G	A	Moderate
361	PvP01_01_v1	395291	G	A	Moderate
362	PvP01_01_v1	395356	G	C	Moderate
363	PvP01_01_v1	395454	T	C	Moderate
364	PvP01_01_v1	395481	C	G	Moderate
365	PvP01_01_v1	395509	G	C	Moderate
366	PvP01_01_v1	395521	C	G	Moderate
367	PvP01_01_v1	395598	C	G	Moderate
368	PvP01_01_v1	396068	A	C	Moderate
369	PvP01_01_v1	396072	T	A	Moderate
370	PvP01_01_v1	396078	G	C	Moderate
371	PvP01_01_v1	396081	G	A	Moderate
372	PvP01_01_v1	396084	A	G	Moderate
373	PvP01_01_v1	396111	T	C	Moderate
374	PvP01_01_v1	396679	G	C	Moderate
375	PvP01_01_v1	397097	T	C	Moderate
376	PvP01_01_v1	397162	C	G	Moderate
377	PvP01_01_v1	399741	C	G	Moderate
378	PvP01_01_v1	400891	T	G	Moderate
379	PvP01_01_v1	404516	G	C	Moderate
380	PvP01_01_v1	406669	G	A	Moderate
381	PvP01_01_v1	408222	A	C	Moderate
382	PvP01_01_v1	412461	C	G	Moderate
383	PvP01_01_v1	413369	C	G	Moderate
384	PvP01_01_v1	413686	G	T	Moderate
385	PvP01_01_v1	414057	C	G	Moderate
386	PvP01_01_v1	416941	T	G	Moderate
387	PvP01_01_v1	421307	A	G	Moderate
388	PvP01_01_v1	421530	C	G	Moderate
389	PvP01_01_v1	425775	C	A	Moderate
390	PvP01_01_v1	426461	T	C	Moderate
391	PvP01_01_v1	426949	C	T	Moderate
392	PvP01_01_v1	427077	C	A	Moderate
393	PvP01_01_v1	437930	T	C	Moderate
394	PvP01_01_v1	438244	A	C	Moderate
395	PvP01_01_v1	439149	T	A	Moderate
396	PvP01_01_v1	448698	C	A	Moderate
397	PvP01_01_v1	449924	C	G	Moderate
398	PvP01_01_v1	450089	T	G	Moderate
399	PvP01_01_v1	450497	C	G,T	Moderate
400	PvP01_01_v1	453127	T	C	Moderate
401	PvP01_01_v1	453998	C	T	Moderate
402	PvP01_01_v1	454716	G	T	Moderate
403	PvP01_01_v1	454997	A	G	Moderate
404	PvP01_01_v1	456338	C	G	Moderate
405	PvP01_01_v1	456988	A	G	Moderate
406	PvP01_01_v1	457694	T	A	Moderate
407	PvP01_01_v1	458249	T	C	Moderate
408	PvP01_01_v1	460268	C	A	Moderate
409	PvP01_01_v1	462354	C	T	Moderate
410	PvP01_01_v1	462366	G	T	Moderate
411	PvP01_01_v1	462786	T	C	Moderate
412	PvP01_01_v1	463278	A	G	Moderate
413	PvP01_01_v1	463576	C	T	Moderate
414	PvP01_01_v1	465090	T	G,*	Moderate
415	PvP01_01_v1	465754	C	G	Moderate
416	PvP01_01_v1	468964	C	A	Moderate
417	PvP01_01_v1	470141	C	T	Moderate
418	PvP01_01_v1	471218	T	C	Moderate
419	PvP01_01_v1	471629	A	T	Moderate
420	PvP01_01_v1	472088	C	A	Moderate
421	PvP01_01_v1	474475	T	C,*	Moderate
422	PvP01_01_v1	474601	C	G	Moderate
423	PvP01_01_v1	474614	A	G	Moderate
424	PvP01_01_v1	474872	G	T	Moderate
425	PvP01_01_v1	475145	C	G,*	Moderate
426	PvP01_01_v1	475165	A	G	Moderate
427	PvP01_01_v1	475494	C	A	Moderate
428	PvP01_01_v1	475667	G	C	Moderate
429	PvP01_01_v1	475675	A	G	Moderate
430	PvP01_01_v1	475676	C	A	Moderate
431	PvP01_01_v1	475691	G	C	Moderate
432	PvP01_01_v1	475726	G	A	Moderate
433	PvP01_01_v1	475727	C	T	Moderate
434	PvP01_01_v1	478559	T	A	Moderate
435	PvP01_01_v1	482354	A	C	Moderate
436	PvP01_01_v1	482691	A	G	Moderate
437	PvP01_01_v1	483736	A	C	Moderate
438	PvP01_01_v1	483737	T	A	Moderate
439	PvP01_01_v1	484061	A	T	Moderate
440	PvP01_01_v1	484322	T	C	Moderate
441	PvP01_01_v1	484332	T	C	Moderate
442	PvP01_01_v1	484338	A	C	Moderate
443	PvP01_01_v1	484340	A	T	Moderate
444	PvP01_01_v1	484422	C	T	Moderate
445	PvP01_01_v1	484457	G	A	Moderate
446	PvP01_01_v1	484481	T	C	Moderate
447	PvP01_01_v1	484487	C	T	Moderate
448	PvP01_01_v1	484590	C	A	Moderate
449	PvP01_01_v1	485171	T	G	Moderate
450	PvP01_01_v1	485240	T	C	Moderate
451	PvP01_01_v1	485256	G	T	Moderate
452	PvP01_01_v1	485466	C	A	Moderate
453	PvP01_01_v1	485865	G	C	Moderate
454	PvP01_01_v1	487635	T	C	Moderate
455	PvP01_01_v1	487841	C	G	Moderate
456	PvP01_01_v1	487952	T	G	Moderate
457	PvP01_01_v1	487966	A	T	Moderate
458	PvP01_01_v1	488141	T	C	Moderate
459	PvP01_01_v1	488663	G	T	Moderate
460	PvP01_01_v1	488804	C	T	Moderate
461	PvP01_01_v1	489099	A	C	Moderate
462	PvP01_01_v1	489123	G	C	Moderate
463	PvP01_01_v1	492211	T	A	Moderate
464	PvP01_01_v1	492274	T	C	Moderate
465	PvP01_01_v1	492275	T	C	Moderate
466	PvP01_01_v1	492282	T	G	Moderate
467	PvP01_01_v1	492283	T	G	Moderate
468	PvP01_01_v1	492301	C	T	Moderate
469	PvP01_01_v1	492583	C	G	Moderate
470	PvP01_01_v1	492982	A	C	Moderate
471	PvP01_01_v1	493453	T	C	Moderate
472	PvP01_01_v1	494404	C	T	Moderate
473	PvP01_01_v1	495349	C	T	Moderate
474	PvP01_01_v1	495413	C	T	Moderate
475	PvP01_01_v1	500776	C	T	Moderate
476	PvP01_01_v1	501550	G	A	Moderate
477	PvP01_01_v1	501838	C	A	Moderate
478	PvP01_01_v1	503883	G	T	Moderate
479	PvP01_01_v1	507693	C	T	Moderate
480	PvP01_01_v1	509067	C	T	Moderate
481	PvP01_01_v1	509215	C	T	Moderate
482	PvP01_01_v1	509525	G	T	Moderate
483	PvP01_01_v1	509586	G	A	Moderate
484	PvP01_01_v1	509686	G	A	Moderate
485	PvP01_01_v1	509816	G	A	Moderate
486	PvP01_01_v1	510535	A	C	Moderate
487	PvP01_01_v1	510927	G	C	Moderate
488	PvP01_01_v1	511077	A	G	Moderate
489	PvP01_01_v1	512584	G	T	Moderate
490	PvP01_01_v1	523374	T	G	Moderate
491	PvP01_01_v1	524881	A	G	Moderate
492	PvP01_01_v1	524974	G	A	Moderate
493	PvP01_01_v1	526422	A	C	Moderate
494	PvP01_01_v1	531000	C	G	Moderate
495	PvP01_01_v1	532879	A	T	Moderate
496	PvP01_01_v1	532949	C	G	Moderate
497	PvP01_01_v1	533152	C	A	Moderate
498	PvP01_01_v1	533197	A	C,T	Moderate
499	PvP01_01_v1	536838	G	A	Moderate
500	PvP01_01_v1	536839	C	A	Moderate
501	PvP01_01_v1	537342	T	C	Moderate
502	PvP01_01_v1	538287	A	T	Moderate
503	PvP01_01_v1	538943	A	C	Moderate
504	PvP01_01_v1	539215	A	C	Moderate
505	PvP01_01_v1	541833	A	T	Moderate
506	PvP01_01_v1	548492	A	G	Moderate
507	PvP01_01_v1	550458	A	C	Moderate
508	PvP01_01_v1	551150	A	C	Moderate
509	PvP01_01_v1	551152	T	G	Moderate
510	PvP01_01_v1	551393	G	C	Moderate
511	PvP01_01_v1	553255	T	G	Moderate
512	PvP01_01_v1	553318	G	T	Moderate
513	PvP01_01_v1	557350	G	T	Moderate
514	PvP01_01_v1	560312	C	T	Moderate
515	PvP01_01_v1	560827	C	A	Moderate
516	PvP01_01_v1	560881	C	T	Moderate
517	PvP01_01_v1	562222	T	A	Moderate
518	PvP01_01_v1	563236	T	C	Moderate
519	PvP01_01_v1	563918	T	G	Moderate
520	PvP01_01_v1	563924	C	T	Moderate
521	PvP01_01_v1	564332	G	T	Moderate
522	PvP01_01_v1	565727	T	G	Moderate
523	PvP01_01_v1	567382	A	T	Moderate
524	PvP01_01_v1	567448	G	A	Moderate
525	PvP01_01_v1	568589	G	C	Moderate
526	PvP01_01_v1	568630	A	G	Moderate
527	PvP01_01_v1	568635	T	C	Moderate
528	PvP01_01_v1	568746	C	T	Moderate
529	PvP01_01_v1	568748	G	C	Moderate
530	PvP01_01_v1	573141	C	A	Moderate
531	PvP01_01_v1	573617	G	A	Moderate
532	PvP01_01_v1	573622	A	C	Moderate
533	PvP01_01_v1	573652	G	C	Moderate
534	PvP01_01_v1	573656	T	A	Moderate
535	PvP01_01_v1	573665	A	G,*	Moderate
536	PvP01_01_v1	573671	T	A	Moderate
537	PvP01_01_v1	573680	A	G,*	Moderate
538	PvP01_01_v1	573686	T	A	Moderate
539	PvP01_01_v1	575050	A	G	Moderate
540	PvP01_01_v1	575457	G	A	Moderate
541	PvP01_01_v1	576035	G	C	Moderate
542	PvP01_01_v1	576641	C	G	Moderate
543	PvP01_01_v1	578055	T	C	Moderate
544	PvP01_01_v1	578061	A	G	Moderate
545	PvP01_01_v1	579464	C	T	Moderate
546	PvP01_01_v1	579928	A	T,*	Moderate
547	PvP01_01_v1	580329	G	C	Moderate
548	PvP01_01_v1	580576	T	C	Moderate
549	PvP01_01_v1	580624	T	C	Moderate
550	PvP01_01_v1	581781	T	G	Moderate
551	PvP01_01_v1	582667	A	G	Moderate
552	PvP01_01_v1	582675	G	A	Moderate
553	PvP01_01_v1	582683	A	C	Moderate
554	PvP01_01_v1	582685	G	A	Moderate
555	PvP01_01_v1	582757	A	G	Moderate
556	PvP01_01_v1	582979	C	G	Moderate
557	PvP01_01_v1	583216	A	G	Moderate
558	PvP01_01_v1	583294	T	C,*	Moderate
559	PvP01_01_v1	588505	T	G	Moderate
560	PvP01_01_v1	588971	G	T	Moderate
561	PvP01_01_v1	596026	C	T	Moderate
562	PvP01_01_v1	600266	G	A	Moderate
563	PvP01_01_v1	600562	T	A	Moderate
564	PvP01_01_v1	600756	A	C	Moderate
565	PvP01_01_v1	600767	T	G	Moderate
566	PvP01_01_v1	601202	T	C	Moderate
567	PvP01_01_v1	604416	T	G	Moderate
568	PvP01_01_v1	604447	G	A	Moderate
569	PvP01_01_v1	604450	G	A	Moderate
570	PvP01_01_v1	604455	A	C	Moderate
571	PvP01_01_v1	604459	C	T	Moderate
572	PvP01_01_v1	604461	G	C	Moderate
573	PvP01_01_v1	604464	T	A	Moderate
574	PvP01_01_v1	604468	G	A	Moderate
575	PvP01_01_v1	604491	A	G	Moderate
576	PvP01_01_v1	604495	C	T	Moderate
577	PvP01_01_v1	604497	G	C	Moderate
578	PvP01_01_v1	604500	T	A	Moderate
579	PvP01_01_v1	604509	C	G	Moderate
580	PvP01_01_v1	604522	G	A	Moderate
581	PvP01_01_v1	604540	G	A	Moderate
582	PvP01_01_v1	604620	A	C	Moderate
583	PvP01_01_v1	604870	G	A	Moderate
584	PvP01_01_v1	604913	C	G	Moderate
585	PvP01_01_v1	604943	C	G	Moderate
586	PvP01_01_v1	610443	C	G	Moderate
587	PvP01_01_v1	611894	C	T	Moderate
588	PvP01_01_v1	612298	T	A	Moderate
589	PvP01_01_v1	612303	C	A,G	Moderate
590	PvP01_01_v1	612348	A	G	Moderate
591	PvP01_01_v1	615398	A	G,*	Moderate
592	PvP01_01_v1	616248	A	C	Moderate
593	PvP01_01_v1	616441	C	A	Moderate
594	PvP01_01_v1	616951	C	T	Moderate
595	PvP01_01_v1	617046	G	C	Moderate
596	PvP01_01_v1	619174	T	C	Moderate
597	PvP01_01_v1	626787	A	G	Moderate
598	PvP01_01_v1	628703	A	T	Moderate
599	PvP01_01_v1	632552	A	C	Moderate
600	PvP01_01_v1	632846	G	C	Moderate
601	PvP01_01_v1	633101	C	T	Moderate
602	PvP01_01_v1	633104	T	C	Moderate
603	PvP01_01_v1	633122	A	T	Moderate
604	PvP01_01_v1	633166	C	G	Moderate
605	PvP01_01_v1	633399	T	G	Moderate
606	PvP01_01_v1	633449	G	A	Moderate
607	PvP01_01_v1	633623	A	G	Moderate
608	PvP01_01_v1	633673	G	T	Moderate
609	PvP01_01_v1	634161	C	A	Moderate
610	PvP01_01_v1	635693	A	G	Moderate
611	PvP01_01_v1	636409	T	A	Moderate
612	PvP01_01_v1	637180	C	T	Moderate
613	PvP01_01_v1	639951	C	T	Moderate
614	PvP01_01_v1	640043	T	A	Moderate
615	PvP01_01_v1	641907	A	G	Moderate
616	PvP01_01_v1	644800	T	C	Moderate
617	PvP01_01_v1	644816	C	T	Moderate
618	PvP01_01_v1	646337	A	T	Moderate
619	PvP01_01_v1	646959	C	G	Moderate
620	PvP01_01_v1	652075	C	A	Moderate
621	PvP01_01_v1	658915	G	A	Moderate
622	PvP01_01_v1	659508	G	C	Moderate
623	PvP01_01_v1	659535	C	G	Moderate
624	PvP01_01_v1	660080	T	C	Moderate
625	PvP01_01_v1	660330	T	G	Moderate
626	PvP01_01_v1	665560	A	C	Moderate
627	PvP01_01_v1	665569	C	A	Moderate
628	PvP01_01_v1	670070	C	T	Moderate
629	PvP01_01_v1	670177	T	A	Moderate
630	PvP01_01_v1	670184	A	T	Moderate
631	PvP01_01_v1	671781	G	A	Moderate
632	PvP01_01_v1	671841	G	A	Moderate
633	PvP01_01_v1	682741	A	G	Moderate
634	PvP01_01_v1	683155	G	A	Moderate
635	PvP01_01_v1	683161	G	T	Moderate
636	PvP01_01_v1	683389	G	A	Moderate
637	PvP01_01_v1	684269	T	C	Moderate
638	PvP01_01_v1	684703	C	A	Moderate
639	PvP01_01_v1	684704	C	T	Moderate
640	PvP01_01_v1	686071	C	G	Moderate
641	PvP01_01_v1	692138	C	A	Moderate
642	PvP01_01_v1	692188	A	C	Moderate
643	PvP01_01_v1	692197	C	T	Moderate
644	PvP01_01_v1	692250	T	A	Moderate
645	PvP01_01_v1	692266	A	G	Moderate
646	PvP01_01_v1	692395	C	G	Moderate
647	PvP01_01_v1	692715	G	A	Moderate
648	PvP01_01_v1	693204	T	G	Moderate
649	PvP01_01_v1	700546	C	A	Moderate
650	PvP01_01_v1	705172	C	A	Moderate
651	PvP01_01_v1	705458	G	A	Moderate
652	PvP01_01_v1	706265	A	G	Moderate
653	PvP01_01_v1	707315	G	C	Moderate
654	PvP01_01_v1	708947	C	G	Moderate
655	PvP01_01_v1	709644	C	T,A	Moderate
656	PvP01_01_v1	709758	C	T	Moderate
657	PvP01_01_v1	710376	C	T	Moderate
658	PvP01_01_v1	713397	G	C	Moderate
659	PvP01_01_v1	713398	T	C	Moderate
660	PvP01_01_v1	714693	C	T	Moderate
661	PvP01_01_v1	714979	G	T	Moderate
662	PvP01_01_v1	716045	T	C	Moderate
663	PvP01_01_v1	718334	T	C	Moderate
664	PvP01_01_v1	718750	C	T	Moderate
665	PvP01_01_v1	718961	A	T	Moderate
666	PvP01_01_v1	718975	G	A	Moderate
667	PvP01_01_v1	720661	A	*,G	Moderate
668	PvP01_01_v1	720662	G	*,C	Moderate
669	PvP01_01_v1	721067	T	C	Moderate
670	PvP01_01_v1	721285	C	T	Moderate
671	PvP01_01_v1	722534	G	C	Moderate
672	PvP01_01_v1	723844	C	G	Moderate
673	PvP01_01_v1	724700	T	G	Moderate
674	PvP01_01_v1	725191	G	T	Moderate
675	PvP01_01_v1	725364	G	C	Moderate
676	PvP01_01_v1	726060	G	T	Moderate
677	PvP01_01_v1	726832	C	T	Moderate
678	PvP01_01_v1	726881	G	A	Moderate
679	PvP01_01_v1	728845	T	C	Moderate
680	PvP01_01_v1	728846	A	T	Moderate
681	PvP01_01_v1	728866	T	A	Moderate
682	PvP01_01_v1	728867	A	G	Moderate
683	PvP01_01_v1	729310	C	T	Moderate
684	PvP01_01_v1	729716	A	G	Moderate
685	PvP01_01_v1	731997	C	G	Moderate
686	PvP01_01_v1	732343	T	C	Moderate
687	PvP01_01_v1	732552	T	A	Moderate
688	PvP01_01_v1	732943	C	T	Moderate
689	PvP01_01_v1	734593	C	A	Moderate
690	PvP01_01_v1	734663	C	A	Moderate
691	PvP01_01_v1	735112	G	C	Moderate
692	PvP01_01_v1	735799	A	G	Moderate
693	PvP01_01_v1	735842	T	C	Moderate
694	PvP01_01_v1	735848	T	C	Moderate
695	PvP01_01_v1	735869	A	T	Moderate
696	PvP01_01_v1	736048	C	G	Moderate
697	PvP01_01_v1	736050	C	G	Moderate
698	PvP01_01_v1	736084	T	G	Moderate
699	PvP01_01_v1	738353	C	G	Moderate
700	PvP01_01_v1	738409	A	G	Moderate
701	PvP01_01_v1	739290	C	G	Moderate
702	PvP01_01_v1	740353	A	G	Moderate
703	PvP01_01_v1	740428	T	C	Moderate
704	PvP01_01_v1	740429	G	A	Moderate
705	PvP01_01_v1	749260	C	T	Moderate
706	PvP01_01_v1	749299	C	G	Moderate
707	PvP01_01_v1	750471	T	G	Moderate
708	PvP01_01_v1	751047	G	A	Moderate
709	PvP01_01_v1	751368	A	G	Moderate
710	PvP01_01_v1	751440	T	*,G	Moderate
711	PvP01_01_v1	751443	G	*,A	Moderate
712	PvP01_01_v1	756633	C	T	Moderate
713	PvP01_01_v1	758504	T	C	Moderate
714	PvP01_01_v1	758575	C	G	Moderate
715	PvP01_01_v1	760356	A	C	Moderate
716	PvP01_01_v1	761198	G	A	Moderate
717	PvP01_01_v1	764552	A	T	Moderate
718	PvP01_01_v1	764664	C	G	Moderate
719	PvP01_01_v1	765249	C	G,*	Moderate
720	PvP01_01_v1	772161	G	A	Moderate
721	PvP01_01_v1	772163	C	G	Moderate
722	PvP01_01_v1	772211	C	G	Moderate
723	PvP01_01_v1	772379	A	C,*	Moderate
724	PvP01_01_v1	772966	G	C	Moderate
725	PvP01_01_v1	775721	T	G,*	Moderate
726	PvP01_01_v1	776503	C	A	Moderate
727	PvP01_01_v1	777010	C	T	Moderate
728	PvP01_01_v1	786536	C	T	Moderate
729	PvP01_01_v1	789059	C	T	Moderate
730	PvP01_01_v1	789956	T	C	Moderate
731	PvP01_01_v1	789957	T	C	Moderate
732	PvP01_01_v1	790177	A	*,T	Moderate
733	PvP01_01_v1	790178	T	*,C	Moderate
734	PvP01_01_v1	790181	A	*,C	Moderate
735	PvP01_01_v1	790188	C	*,T	Moderate
736	PvP01_01_v1	790190	T	*,C	Moderate
737	PvP01_01_v1	790193	A	*,C	Moderate
738	PvP01_01_v1	790205	A	C	Moderate
739	PvP01_01_v1	790212	C	T	Moderate
740	PvP01_01_v1	790880	C	T	Moderate
741	PvP01_01_v1	791718	C	T	Moderate
742	PvP01_01_v1	791724	C	T	Moderate
743	PvP01_01_v1	791726	C	A	Moderate
744	PvP01_01_v1	791727	A	G	Moderate
745	PvP01_01_v1	791733	G	C	Moderate
746	PvP01_01_v1	791744	T	G	Moderate
747	PvP01_01_v1	791925	G	C	Moderate
748	PvP01_01_v1	792077	C	A	Moderate
749	PvP01_01_v1	792120	C	T	Moderate
750	PvP01_01_v1	797074	G	T	Moderate
751	PvP01_01_v1	797497	G	T	Moderate
752	PvP01_01_v1	797662	G	A	Moderate
753	PvP01_01_v1	798799	C	T	Moderate
754	PvP01_01_v1	799267	C	G	Moderate
755	PvP01_01_v1	799322	T	A	Moderate
756	PvP01_01_v1	799330	G	A	Moderate
757	PvP01_01_v1	800156	G	C	Moderate
758	PvP01_01_v1	800830	T	G	Moderate
759	PvP01_01_v1	801628	A	G	Moderate
760	PvP01_01_v1	801764	T	C	Moderate
761	PvP01_01_v1	801794	T	C	Moderate
762	PvP01_01_v1	801799	C	A	Moderate
763	PvP01_01_v1	805432	A	G	Moderate
764	PvP01_01_v1	805451	C	G	Moderate
765	PvP01_01_v1	806238	G	T	Moderate
766	PvP01_01_v1	807121	C	T	Moderate
767	PvP01_01_v1	813336	C	G	Moderate
768	PvP01_01_v1	813998	T	C	Moderate
769	PvP01_01_v1	814701	G	A	Moderate
770	PvP01_01_v1	815103	G	T	Moderate
771	PvP01_01_v1	815456	A	G	Moderate
772	PvP01_01_v1	815541	C	G	Moderate
773	PvP01_01_v1	816455	G	C	Moderate
774	PvP01_01_v1	818556	G	A,*	Moderate
775	PvP01_01_v1	818768	G	A	Moderate
776	PvP01_01_v1	818887	G	A	Moderate
777	PvP01_01_v1	819254	T	A	Moderate
778	PvP01_01_v1	819471	G	A	Moderate
779	PvP01_01_v1	819479	C	A	Moderate
780	PvP01_01_v1	819700	C	G	Moderate
781	PvP01_01_v1	819745	C	G	Moderate
782	PvP01_01_v1	819770	A	T	Moderate
783	PvP01_01_v1	822854	C	T	Moderate
784	PvP01_01_v1	822860	C	T	Moderate
785	PvP01_01_v1	822871	T	C	Moderate
786	PvP01_01_v1	822889	T	C	Moderate
787	PvP01_01_v1	822894	G	T	Moderate
788	PvP01_01_v1	822912	G	T	Moderate
789	PvP01_01_v1	822919	G	A	Moderate
790	PvP01_01_v1	822929	A	*,C	Moderate
791	PvP01_01_v1	823514	C	T	Moderate
792	PvP01_01_v1	825131	C	A	Moderate
793	PvP01_01_v1	828113	T	C	Moderate
794	PvP01_01_v1	829127	T	G	Moderate
795	PvP01_01_v1	829513	G	C	Moderate
796	PvP01_01_v1	829591	G	A	Moderate
797	PvP01_01_v1	829595	C	T	Moderate
798	PvP01_01_v1	830329	A	G	Moderate
799	PvP01_01_v1	830405	G	A	Moderate
800	PvP01_01_v1	830429	C	T	Moderate
801	PvP01_01_v1	830433	A	C	Moderate
802	PvP01_01_v1	830740	G	A	Moderate
803	PvP01_01_v1	830995	G	C	Moderate
804	PvP01_01_v1	830999	C	T	Moderate
805	PvP01_01_v1	831002	C	T	Moderate
806	PvP01_01_v1	831176	A	T,*	Moderate
807	PvP01_01_v1	832323	C	G	Moderate
808	PvP01_01_v1	832361	G	T	Moderate
809	PvP01_01_v1	832433	G	A,*	Moderate
810	PvP01_01_v1	832589	T	G	Moderate
811	PvP01_01_v1	833891	T	C	Moderate
812	PvP01_01_v1	833982	G	C	Moderate
813	PvP01_01_v1	834140	T	C	Moderate
814	PvP01_01_v1	834966	T	A	Moderate
815	PvP01_01_v1	835003	G	A	Moderate
816	PvP01_01_v1	835466	T	C	Moderate
817	PvP01_01_v1	836603	G	T	Moderate
818	PvP01_01_v1	836684	T	C	Moderate
819	PvP01_01_v1	836798	C	G	Moderate
820	PvP01_01_v1	836913	C	A	Moderate
821	PvP01_01_v1	837262	T	*,C	Moderate
822	PvP01_01_v1	838112	T	C	Moderate
823	PvP01_01_v1	838211	T	G	Moderate
824	PvP01_01_v1	846968	C	G	Moderate
825	PvP01_01_v1	847205	G	T	Moderate
826	PvP01_01_v1	847215	G	A	Moderate
827	PvP01_01_v1	847220	G	C	Moderate
828	PvP01_01_v1	847339	G	T	Moderate
829	PvP01_01_v1	850689	T	C	Moderate
830	PvP01_01_v1	850742	C	T	Moderate
831	PvP01_01_v1	850746	T	G	Moderate
832	PvP01_01_v1	850771	C	A	Moderate
833	PvP01_01_v1	850775	T	C	Moderate
834	PvP01_01_v1	850817	C	T	Moderate
835	PvP01_01_v1	851306	A	G	Moderate
836	PvP01_01_v1	854159	G	A	Moderate
837	PvP01_01_v1	858579	G	A	Moderate
838	PvP01_01_v1	863993	A	G	Moderate
839	PvP01_01_v1	866996	G	A	Moderate
840	PvP01_01_v1	867280	T	A	Moderate
841	PvP01_01_v1	867493	C	A	Moderate
842	PvP01_01_v1	882520	C	G	Moderate
843	PvP01_01_v1	883170	G	A	Moderate
844	PvP01_01_v1	883178	C	A	Moderate
845	PvP01_01_v1	883185	C	T	Moderate
846	PvP01_01_v1	883320	G	A	Moderate
847	PvP01_01_v1	883384	G	T,C	Moderate
848	PvP01_01_v1	883451	G	C	Moderate
849	PvP01_01_v1	883485	A	C	Moderate
850	PvP01_01_v1	883530	C	T	Moderate
851	PvP01_01_v1	883617	T	A	Moderate
852	PvP01_01_v1	883635	G	A	Moderate
853	PvP01_01_v1	883678	G	C	Moderate
854	PvP01_01_v1	883790	T	A	Moderate
855	PvP01_01_v1	883802	A	C	Moderate
856	PvP01_01_v1	884006	A	C,T	Moderate
857	PvP01_01_v1	884013	T	C	Moderate
858	PvP01_01_v1	884015	T	C	Moderate
859	PvP01_01_v1	884027	A	G	Moderate
860	PvP01_01_v1	884112	C	A	Moderate
861	PvP01_01_v1	887256	A	C	Moderate
862	PvP01_01_v1	887462	A	T	Moderate
863	PvP01_01_v1	892707	A	G	Moderate
864	PvP01_01_v1	893483	A	G	Moderate
865	PvP01_01_v1	893575	T	G	Moderate
866	PvP01_01_v1	897806	A	G	Moderate
867	PvP01_01_v1	898092	G	A	Moderate
868	PvP01_01_v1	898143	G	A	Moderate
869	PvP01_01_v1	898344	G	A	Moderate
870	PvP01_01_v1	898362	G	A	Moderate
871	PvP01_01_v1	898380	G	A	Moderate
872	PvP01_01_v1	903066	T	C	Moderate
873	PvP01_01_v1	903273	G	A	Moderate
874	PvP01_01_v1	903486	C	G	Moderate
875	PvP01_01_v1	903493	A	G	Moderate
876	PvP01_01_v1	903498	T	C	Moderate
877	PvP01_01_v1	903511	T	A,G	Moderate
878	PvP01_01_v1	910882	A	T	Moderate
879	PvP01_01_v1	910905	T	C	Moderate
880	PvP01_01_v1	910908	C	T	Moderate
881	PvP01_01_v1	911108	A	T	Moderate
882	PvP01_01_v1	911120	G	C,A	Moderate
883	PvP01_01_v1	911122	G	A	Moderate
884	PvP01_01_v1	911126	T	A	Moderate
885	PvP01_01_v1	911132	G	A	Moderate
886	PvP01_01_v1	911135	G	A	Moderate
887	PvP01_01_v1	911137	G	T	Moderate
888	PvP01_01_v1	911193	G	T	Moderate
889	PvP01_01_v1	911378	T	C	Moderate
890	PvP01_01_v1	911382	A	C	Moderate
891	PvP01_01_v1	911389	T	C	Moderate
892	PvP01_01_v1	911390	A	G	Moderate
893	PvP01_01_v1	911400	T	G	Moderate
894	PvP01_01_v1	911407	A	G	Moderate
895	PvP01_01_v1	911408	A	G	Moderate
896	PvP01_01_v1	911409	T	G	Moderate
897	PvP01_01_v1	911420	A	T	Moderate
898	PvP01_01_v1	911426	A	C	Moderate
899	PvP01_01_v1	911543	A	C	Moderate
900	PvP01_01_v1	911544	T	G	Moderate
901	PvP01_01_v1	911548	G	C	Moderate
902	PvP01_01_v1	911563	A	G	Moderate
903	PvP01_01_v1	911574	T	G	Moderate
904	PvP01_01_v1	911585	T	A	Moderate
905	PvP01_01_v1	911587	A	G	Moderate
906	PvP01_01_v1	911589	C	G	Moderate
907	PvP01_01_v1	911743	C	G	Moderate
908	PvP01_01_v1	911756	A	C	Moderate
909	PvP01_01_v1	911759	C	A	Moderate
910	PvP01_01_v1	911762	C	T	Moderate
911	PvP01_01_v1	911798	C	A	Moderate
912	PvP01_01_v1	911800	C	T	Moderate
913	PvP01_01_v1	911801	G	A	Moderate
914	PvP01_01_v1	912215	A	C	Moderate
915	PvP01_01_v1	912220	C	G	Moderate
916	PvP01_01_v1	912257	T	C	Moderate
917	PvP01_01_v1	912283	C	A	Moderate
918	PvP01_01_v1	912480	A	T	Moderate
919	PvP01_01_v1	912482	G	T	Moderate
920	PvP01_01_v1	912489	T	C	Moderate
921	PvP01_01_v1	912502	C	T	Moderate
922	PvP01_01_v1	912526	G	T	Moderate
923	PvP01_01_v1	912542	G	A	Moderate
924	PvP01_01_v1	912553	C	G	Moderate
925	PvP01_01_v1	914107	T	C	Moderate
926	PvP01_01_v1	914546	A	C	Moderate
927	PvP01_01_v1	914633	T	C	Moderate
928	PvP01_01_v1	915157	G	T	Moderate
929	PvP01_01_v1	915165	G	T	Moderate
930	PvP01_01_v1	915194	C	T	Moderate
931	PvP01_01_v1	915229	A	G	Moderate
932	PvP01_01_v1	915237	C	A	Moderate
933	PvP01_01_v1	915239	G	T	Moderate
934	PvP01_01_v1	915298	T	C	Moderate
935	PvP01_01_v1	915506	G	A	Moderate
936	PvP01_01_v1	915511	G	T	Moderate
937	PvP01_01_v1	915578	C	T	Moderate
938	PvP01_01_v1	915584	T	G	Moderate
939	PvP01_01_v1	915601	A	T	Moderate
940	PvP01_01_v1	915605	A	G	Moderate
941	PvP01_01_v1	915608	A	C	Moderate
942	PvP01_01_v1	915619	C	T	Moderate
943	PvP01_01_v1	915638	T	C	Moderate
944	PvP01_01_v1	915643	C	T	Moderate
945	PvP01_01_v1	921241	T	A	Moderate
946	PvP01_01_v1	921243	G	T	Moderate
947	PvP01_01_v1	921431	G	A	Moderate
948	PvP01_01_v1	921433	T	A	Moderate
949	PvP01_01_v1	921438	C	A	Moderate
950	PvP01_01_v1	921440	C	A	Moderate
951	PvP01_01_v1	921449	G	A	Moderate
952	PvP01_01_v1	921470	A	G	Moderate
953	PvP01_01_v1	921507	T	A	Moderate
954	PvP01_01_v1	921511	G	T	Moderate
955	PvP01_01_v1	921524	C	T	Moderate
956	PvP01_01_v1	921525	A	G	Moderate
957	PvP01_01_v1	921549	A	T	Moderate
958	PvP01_01_v1	921551	A	G	Moderate
959	PvP01_01_v1	921552	G	T	Moderate
960	PvP01_01_v1	921555	C	G	Moderate
961	PvP01_01_v1	921579	G	A	Moderate
962	PvP01_01_v1	921605	A	G	Moderate
963	PvP01_01_v1	921612	C	T	Moderate
964	PvP01_01_v1	921614	A	G	Moderate
965	PvP01_01_v1	921617	A	G	Moderate
966	PvP01_01_v1	921620	G	A	Moderate
967	PvP01_01_v1	921626	A	G	Moderate
968	PvP01_01_v1	921629	G	A	Moderate
969	PvP01_01_v1	921632	A	G	Moderate
970	PvP01_01_v1	921633	T	C	Moderate
971	PvP01_01_v1	921645	A	T	Moderate
972	PvP01_01_v1	921668	A	T	Moderate
973	PvP01_01_v1	921690	T	C	Moderate
974	PvP01_01_v1	921701	G	A	Moderate
975	PvP01_01_v1	921708	A	C	Moderate
976	PvP01_01_v1	921709	A	C	Moderate
977	PvP01_01_v1	921710	A	C	Moderate
978	PvP01_01_v1	921877	T	A	Moderate
979	PvP01_01_v1	921880	A	C	Moderate
980	PvP01_01_v1	921886	G	T	Moderate
981	PvP01_01_v1	921921	A	G	Moderate
982	PvP01_01_v1	921946	G	A	Moderate
983	PvP01_01_v1	921965	C	G	Moderate
984	PvP01_01_v1	921972	A	G	Moderate
985	PvP01_01_v1	921986	G	A	Moderate
986	PvP01_01_v1	922001	T	C	Moderate
987	PvP01_01_v1	922010	C	G	Moderate
988	PvP01_01_v1	922039	A	G	Moderate
989	PvP01_01_v1	922527	C	G	Moderate
990	PvP01_01_v1	922542	C	A	Moderate
991	PvP01_01_v1	922565	A	C	Moderate
992	PvP01_01_v1	923008	C	G	Moderate
993	PvP01_01_v1	927275	C	T	Moderate
994	PvP01_01_v1	927281	C	T	Moderate
995	PvP01_01_v1	927299	G	T	Moderate
996	PvP01_01_v1	927304	A	G	Moderate
997	PvP01_01_v1	927305	C	A	Moderate
998	PvP01_01_v1	927308	C	G	Moderate
999	PvP01_01_v1	927311	C	T	Moderate
1000	PvP01_01_v1	927316	G	A	Moderate
1001	PvP01_01_v1	927751	T	G	Moderate
1002	PvP01_01_v1	927754	A	T	Moderate
1003	PvP01_01_v1	932766	T	G	Moderate
1004	PvP01_01_v1	932804	G	A	Moderate
1005	PvP01_01_v1	932856	C	T	Moderate
1006	PvP01_01_v1	932860	A	T	Moderate
1007	PvP01_01_v1	932885	A	G	Moderate
1008	PvP01_01_v1	932906	A	G	Moderate
1009	PvP01_01_v1	932913	C	T	Moderate
1010	PvP01_01_v1	932939	A	G	Moderate
1011	PvP01_01_v1	932973	A	G	Moderate
1012	PvP01_01_v1	932984	A	T	Moderate
1013	PvP01_01_v1	933000	G	T	Moderate
1014	PvP01_01_v1	933065	A	G	Moderate
1015	PvP01_01_v1	933094	A	G	Moderate
1016	PvP01_01_v1	933095	A	G	Moderate
1017	PvP01_01_v1	935909	T	A	Moderate
1018	PvP01_01_v1	935918	A	C	Moderate
1019	PvP01_01_v1	935950	A	C	Moderate
1020	PvP01_01_v1	936713	G	A	Moderate
1021	PvP01_01_v1	936855	C	A	Moderate
1022	PvP01_01_v1	937026	G	T	Moderate
1023	PvP01_01_v1	937067	A	T	Moderate
1024	PvP01_01_v1	937073	T	G	Moderate
1025	PvP01_01_v1	937074	T	C	Moderate
1026	PvP01_01_v1	937076	C	A	Moderate
1027	PvP01_01_v1	937082	A	G	Moderate
1028	PvP01_01_v1	937091	A	T	Moderate
1029	PvP01_01_v1	937100	T	C	Moderate
1030	PvP01_01_v1	937112	A	G	Moderate
1031	PvP01_01_v1	937118	T	A	Moderate
1032	PvP01_01_v1	937128	G	T	Moderate
1033	PvP01_01_v1	937146	T	G	Moderate
1034	PvP01_01_v1	937158	T	C	Moderate
1035	PvP01_01_v1	937164	C	T	Moderate
1036	PvP01_01_v1	937167	C	T	Moderate
1037	PvP01_01_v1	937190	A	C	Moderate
1038	PvP01_01_v1	937202	T	C	Moderate
1039	PvP01_01_v1	937208	A	T	Moderate
1040	PvP01_01_v1	937284	T	C	Moderate
1041	PvP01_01_v1	937286	T	C	Moderate
1042	PvP01_01_v1	937289	C	T	Moderate
1043	PvP01_01_v1	937295	T	A	Moderate
1044	PvP01_01_v1	937400	A	T	Moderate
1045	PvP01_01_v1	939466	C	T	Moderate
1046	PvP01_01_v1	940174	C	T	Moderate
1047	PvP01_01_v1	945741	T	G	Moderate
1048	PvP01_01_v1	945808	C	G	Moderate
1049	PvP01_01_v1	945811	T	A	Moderate
1050	PvP01_01_v1	945818	G	A	Moderate
1051	PvP01_01_v1	945821	C	A	Moderate
1052	PvP01_01_v1	945835	A	C	Moderate
1053	PvP01_01_v1	945859	A	T	Moderate
1054	PvP01_01_v1	956589	T	C	Moderate
1055	PvP01_01_v1	956592	C	T	Moderate
1056	PvP01_01_v1	956820	A	G	Moderate
1057	PvP01_01_v1	956822	G	T	Moderate
1058	PvP01_01_v1	956823	G	C	Moderate
1059	PvP01_01_v1	956832	C	T	Moderate
1060	PvP01_01_v1	956837	G	T	Moderate
1061	PvP01_01_v1	956857	A	T	Moderate
1062	PvP01_01_v1	961309	A	G	Moderate
1063	PvP01_01_v1	961331	G	C	Moderate
1064	PvP01_01_v1	961345	C	T	Moderate
1065	PvP01_01_v1	961352	G	A	Moderate
1066	PvP01_01_v1	961354	G	A	Moderate
1067	PvP01_01_v1	971503	G	T	Moderate
1068	PvP01_01_v1	971506	G	C	Moderate
1069	PvP01_01_v1	971517	T	A	Moderate
1070	PvP01_01_v1	971527	G	T	Moderate
1071	PvP01_01_v1	971571	A	G	Moderate
1072	PvP01_01_v1	971636	G	T	Moderate
1073	PvP01_01_v1	971638	C	A	Moderate
1074	PvP01_01_v1	971642	G	T	Moderate
1075	PvP01_01_v1	971659	C	T	Moderate
1076	PvP01_01_v1	971668	T	C	Moderate
1077	PvP01_01_v1	971677	T	C	Moderate
1078	PvP01_01_v1	971683	G	T	Moderate
1079	PvP01_01_v1	971778	A	G	Moderate
1080	PvP01_01_v1	971812	G	T	Moderate
1081	PvP01_01_v1	971838	A	G	Moderate
1082	PvP01_01_v1	971856	C	T	Moderate
1083	PvP01_01_v1	972158	C	T	Moderate
1084	PvP01_01_v1	972172	G	T	Moderate
1085	PvP01_01_v1	972180	T	A	Moderate
1086	PvP01_01_v1	972269	T	C	Moderate
1087	PvP01_01_v1	975363	C	A	Moderate
1088	PvP01_01_v1	975569	T	C	Moderate
1089	PvP01_01_v1	975576	G	C	Moderate
1090	PvP01_01_v1	975577	T	A	Moderate
1091	PvP01_01_v1	975590	C	T	Moderate
1092	PvP01_01_v1	975592	T	A	Moderate
1093	PvP01_01_v1	975597	G	C	Moderate
1094	PvP01_01_v1	975602	T	A	Moderate
1095	PvP01_01_v1	975605	T	C	Moderate
1096	PvP01_01_v1	981401	C	T	Moderate
1097	PvP01_01_v1	985462	G	C	Moderate
1098	PvP01_01_v1	985471	T	C	Moderate
1099	PvP01_01_v1	985517	C	G	Moderate
1100	PvP01_01_v1	985519	T	A	Moderate
1101	PvP01_01_v1	986239	T	A	Moderate
1102	PvP01_01_v1	986647	C	T	Moderate
1103	PvP01_01_v1	986903	T	C	Moderate
1104	PvP01_01_v1	995889	G	A	Moderate
1105	PvP01_01_v1	995925	T	C	Moderate
1106	PvP01_01_v1	995928	T	C	Moderate
1107	PvP01_01_v1	995930	C	T	Moderate
1108	PvP01_01_v1	995938	G	T	Moderate
1109	PvP01_01_v1	995940	A	T	Moderate
1110	PvP01_01_v1	995976	T	A	Moderate
1111	PvP01_01_v1	995984	G	A	Moderate
1112	PvP01_01_v1	995998	T	G	Moderate
1113	PvP01_01_v1	996243	G	A	Moderate
1114	PvP01_01_v1	996390	G	C	Moderate
1115	PvP01_01_v1	996402	C	T	Moderate
1116	PvP01_01_v1	996414	G	C	Moderate
1117	PvP01_01_v1	996429	C	G	Moderate
1118	PvP01_01_v1	996489	C	T	Moderate
1119	PvP01_01_v1	1001862	T	C	Moderate
1120	PvP01_01_v1	1001949	C	G	Moderate
1121	PvP01_01_v1	1001954	T	C	Moderate
1122	PvP01_01_v1	1001956	A	T	Moderate
1123	PvP01_01_v1	1001961	T	C	Moderate
1124	PvP01_01_v1	1002568	A	G	Moderate
1125	PvP01_01_v1	1008922	A	T	Moderate
1126	PvP01_01_v1	1009003	A	G	Moderate
1127	PvP01_01_v1	1009143	C	G	Moderate
1128	PvP01_01_v1	1009173	C	A	Moderate
1129	PvP01_01_v1	1009194	T	G	Moderate
1130	PvP01_01_v1	1009223	C	A	Moderate
1131	PvP01_01_v1	1009225	C	T	Moderate
1132	PvP01_01_v1	1009262	G	A	Moderate
1133	PvP01_01_v1	1009267	A	T	Moderate
1134	PvP01_01_v1	1009274	G	T	Moderate
1135	PvP01_01_v1	1009288	A	C	Moderate
1136	PvP01_01_v1	1009307	C	T	Moderate
1137	PvP01_01_v1	1012651	A	T	Moderate
1138	PvP01_01_v1	1012656	A	G	Moderate
1139	PvP01_01_v1	1012662	T	A	Moderate
1140	PvP01_01_v1	1012664	T	A	Moderate
1141	PvP01_01_v1	1012686	A	T,G	Moderate
1142	PvP01_01_v1	1012748	T	C	Moderate
1143	PvP01_01_v1	1012757	A	T	Moderate
1144	PvP01_01_v1	1012759	G	T	Moderate
1145	PvP01_01_v1	1012832	C	G	Moderate
1146	PvP01_01_v1	1014563	T	C	Moderate
1147	PvP01_01_v1	1014569	C	G	Moderate
1148	PvP01_01_v1	1014588	A	T	Moderate
1149	PvP01_01_v1	1014598	G	A	Moderate
1150	PvP01_01_v1	1014622	C	T	Moderate
1151	PvP01_01_v1	1014652	A	C	Moderate
1152	PvP01_01_v1	1014877	T	A	Moderate
1153	PvP01_01_v1	1015235	A	G	Moderate
1154	PvP01_01_v1	1015543	G	T	Moderate
1155	PvP01_01_v1	1015546	G	T	Moderate
1156	PvP01_01_v1	1015553	C	T	Moderate
1157	PvP01_01_v1	1015565	G	T	Moderate
1158	PvP01_01_v1	1015613	C	T	Moderate
1159	PvP01_01_v1	1015642	G	A	Moderate
1160	PvP01_01_v1	1015694	T	A	Moderate
1161	PvP01_01_v1	1015702	C	T	Moderate
1162	PvP01_01_v1	1015717	G	T	Moderate
1163	PvP01_01_v1	1015723	T	C	Moderate
1164	PvP01_01_v1	1018390	T	A	Moderate
1165	PvP01_01_v1	1018418	G	A	Moderate
1166	PvP01_01_v1	1018461	A	C	Moderate
1167	PvP01_02_v1	2889	A	G	Moderate
1168	PvP01_02_v1	2984	T	A	Moderate
1169	PvP01_02_v1	2994	A	G	Moderate
1170	PvP01_02_v1	3000	T	C	Moderate
1171	PvP01_02_v1	3173	A	G	Moderate
1172	PvP01_02_v1	3201	C	G	Moderate
1173	PvP01_02_v1	3209	A	G	Moderate
1174	PvP01_02_v1	3293	A	G	Moderate
1175	PvP01_02_v1	3315	T	G	Moderate
1176	PvP01_02_v1	3386	T	A	Moderate
1177	PvP01_02_v1	3432	C	G	Moderate
1178	PvP01_02_v1	3612	T	C	Moderate
1179	PvP01_02_v1	3684	C	A	Moderate
1180	PvP01_02_v1	3770	G	A	Moderate
1181	PvP01_02_v1	3856	C	G	Moderate
1182	PvP01_02_v1	3939	T	G	Moderate
1183	PvP01_02_v1	3993	C	T	Moderate
1184	PvP01_02_v1	4008	A	G	Moderate
1185	PvP01_02_v1	4018	G	C	Moderate
1186	PvP01_02_v1	4188	T	G	Moderate
1187	PvP01_02_v1	4208	T	A	Moderate
1188	PvP01_02_v1	4215	T	C	Moderate
1189	PvP01_02_v1	4221	T	A	Moderate
1190	PvP01_02_v1	4230	C	G	Moderate
1191	PvP01_02_v1	4233	C	T	Moderate
1192	PvP01_02_v1	4423	C	A	Moderate
1193	PvP01_02_v1	4424	A	T	Moderate
1194	PvP01_02_v1	4495	T	C	Moderate
1195	PvP01_02_v1	4507	T	G	Moderate
1196	PvP01_02_v1	4512	C	T	Moderate
1197	PvP01_02_v1	4513	C	T	Moderate
1198	PvP01_02_v1	4517	A	C	Moderate
1199	PvP01_02_v1	4522	T	C	Moderate
1200	PvP01_02_v1	4783	A	G	Moderate
1201	PvP01_02_v1	4791	T	A	Moderate
1202	PvP01_02_v1	4792	A	C	Moderate
1203	PvP01_02_v1	4839	T	A	Moderate
1204	PvP01_02_v1	4900	C	T	Moderate
1205	PvP01_02_v1	5149	G	A	Moderate
1206	PvP01_02_v1	5151	T	C	Moderate
1207	PvP01_02_v1	5162	A	T	Moderate
1208	PvP01_02_v1	8506	C	T	Moderate
1209	PvP01_02_v1	8537	A	G	Moderate
1210	PvP01_02_v1	8581	G	C	Moderate
1211	PvP01_02_v1	8582	C	T	Moderate
1212	PvP01_02_v1	8587	C	G	Moderate
1213	PvP01_02_v1	8598	T	A	Moderate
1214	PvP01_02_v1	8600	T	C	Moderate
1215	PvP01_02_v1	8797	G	A	Moderate
1216	PvP01_02_v1	8842	T	A	Moderate
1217	PvP01_02_v1	9038	G	T	Moderate
1218	PvP01_02_v1	9043	G	A	Moderate
1219	PvP01_02_v1	9069	A	C	Moderate
1220	PvP01_02_v1	9071	C	T	Moderate
1221	PvP01_02_v1	9077	C	G	Moderate
1222	PvP01_02_v1	9149	C	G	Moderate
1223	PvP01_02_v1	9157	G	T	Moderate
1224	PvP01_02_v1	9170	T	G	Moderate
1225	PvP01_02_v1	9368	T	A	Moderate
1226	PvP01_02_v1	9400	C	T	Moderate
1227	PvP01_02_v1	9407	C	T	Moderate
1228	PvP01_02_v1	9672	C	A	Moderate
1229	PvP01_02_v1	9683	G	A	Moderate
1230	PvP01_02_v1	9686	C	T	Moderate
1231	PvP01_02_v1	9692	T	A	Moderate
1232	PvP01_02_v1	9693	T	C	Moderate
1233	PvP01_02_v1	9698	T	A	Moderate
1234	PvP01_02_v1	9701	T	C	Moderate
1235	PvP01_02_v1	9707	T	C	Moderate
1236	PvP01_02_v1	9748	T	C	Moderate
1237	PvP01_02_v1	9761	G	C	Moderate
1238	PvP01_02_v1	9770	C	T	Moderate
1239	PvP01_02_v1	9883	G	A	Moderate
1240	PvP01_02_v1	9886	T	A	Moderate
1241	PvP01_02_v1	9899	T	A	Moderate
1242	PvP01_02_v1	10006	T	A	Moderate
1243	PvP01_02_v1	10039	T	C	Moderate
1244	PvP01_02_v1	10042	C	T	Moderate
1245	PvP01_02_v1	10043	T	C	Moderate
1246	PvP01_02_v1	10476	G	T,*	Moderate
1247	PvP01_02_v1	10477	C	T,*	Moderate
1248	PvP01_02_v1	10494	G	T	Moderate
1249	PvP01_02_v1	10495	C	T	Moderate
1250	PvP01_02_v1	10497	G	A	Moderate
1251	PvP01_02_v1	10500	G	A	Moderate
1252	PvP01_02_v1	10505	G	T	Moderate
1253	PvP01_02_v1	16456	T	G	Moderate
1254	PvP01_02_v1	16476	C	T	Moderate
1255	PvP01_02_v1	16748	A	T	Moderate
1256	PvP01_02_v1	16829	C	T	Moderate
1257	PvP01_02_v1	16863	T	C	Moderate
1258	PvP01_02_v1	21863	C	G	Moderate
1259	PvP01_02_v1	21871	A	G	Moderate
1260	PvP01_02_v1	21874	G	A	Moderate
1261	PvP01_02_v1	21937	G	A	Moderate
1262	PvP01_02_v1	21938	A	T	Moderate
1263	PvP01_02_v1	22030	C	A	Moderate
1264	PvP01_02_v1	22033	A	C	Moderate
1265	PvP01_02_v1	22043	C	G	Moderate
1266	PvP01_02_v1	22181	A	T	Moderate
1267	PvP01_02_v1	22288	A	G	Moderate
1268	PvP01_02_v1	22334	G	C	Moderate
1269	PvP01_02_v1	26511	A	G	Moderate
1270	PvP01_02_v1	26512	G	A	Moderate
1271	PvP01_02_v1	26518	T	C	Moderate
1272	PvP01_02_v1	30614	G	A	Moderate
1273	PvP01_02_v1	30825	C	A	Moderate
1274	PvP01_02_v1	31653	A	G	Moderate
1275	PvP01_02_v1	31662	A	G	Moderate
1276	PvP01_02_v1	35382	G	A	Moderate
1277	PvP01_02_v1	35826	G	A	Moderate
1278	PvP01_02_v1	35833	G	T	Moderate
1279	PvP01_02_v1	35838	C	G	Moderate
1280	PvP01_02_v1	35842	C	G	Moderate
1281	PvP01_02_v1	35862	A	G	Moderate
1282	PvP01_02_v1	35871	G	C	Moderate
1283	PvP01_02_v1	35892	G	C	Moderate
1284	PvP01_02_v1	35893	A	C	Moderate
1285	PvP01_02_v1	35894	G	C	Moderate
1286	PvP01_02_v1	35896	G	A	Moderate
1287	PvP01_02_v1	36141	A	G	Moderate
1288	PvP01_02_v1	36159	G	A	Moderate
1289	PvP01_02_v1	40182	T	A	Moderate
1290	PvP01_02_v1	40206	A	G	Moderate
1291	PvP01_02_v1	40208	G	A	Moderate
1292	PvP01_02_v1	40217	G	A	Moderate
1293	PvP01_02_v1	40224	A	G	Moderate
1294	PvP01_02_v1	40441	T	C	Moderate
1295	PvP01_02_v1	40498	T	A	Moderate
1296	PvP01_02_v1	40513	G	C	Moderate
1297	PvP01_02_v1	43784	A	G	Moderate
1298	PvP01_02_v1	43811	T	A	Moderate
1299	PvP01_02_v1	43815	C	G	Moderate
1300	PvP01_02_v1	44502	T	C	Moderate
1301	PvP01_02_v1	44732	C	A	Moderate
1302	PvP01_02_v1	44801	C	A	Moderate
1303	PvP01_02_v1	44814	G	A	Moderate
1304	PvP01_02_v1	52729	A	C	Moderate
1305	PvP01_02_v1	59098	A	G	Moderate
1306	PvP01_02_v1	59510	A	G	Moderate
1307	PvP01_02_v1	62556	T	C	Moderate
1308	PvP01_02_v1	62559	G	T,C	Moderate
1309	PvP01_02_v1	62568	T	G	Moderate
1310	PvP01_02_v1	62580	G	T	Moderate
1311	PvP01_02_v1	63060	G	C	Moderate
1312	PvP01_02_v1	63064	T	G	Moderate
1313	PvP01_02_v1	63068	C	T	Moderate
1314	PvP01_02_v1	63075	C	T	Moderate
1315	PvP01_02_v1	63086	G	C	Moderate
1316	PvP01_02_v1	67341	G	T	Moderate
1317	PvP01_02_v1	67479	C	T,A	Moderate
1318	PvP01_02_v1	67480	T	A	Moderate
1319	PvP01_02_v1	67482	T	C	Moderate
1320	PvP01_02_v1	67484	G	T	Moderate
1321	PvP01_02_v1	67493	G	T,*	Moderate
1322	PvP01_02_v1	67494	G	T,*	Moderate
1323	PvP01_02_v1	67501	T	G	Moderate
1324	PvP01_02_v1	67616	C	G	Moderate
1325	PvP01_02_v1	67780	C	A	Moderate
1326	PvP01_02_v1	67883	T	C	Moderate
1327	PvP01_02_v1	67892	T	G	Moderate
1328	PvP01_02_v1	67895	C	T	Moderate
1329	PvP01_02_v1	67904	T	C	Moderate
1330	PvP01_02_v1	67915	A	T	Moderate
1331	PvP01_02_v1	67925	C	T	Moderate
1332	PvP01_02_v1	68081	T	C	Moderate
1333	PvP01_02_v1	68082	T	C	Moderate
1334	PvP01_02_v1	71778	G	C	Moderate
1335	PvP01_02_v1	71844	C	T	Moderate
1336	PvP01_02_v1	71908	T	G	Moderate
1337	PvP01_02_v1	71929	T	C	Moderate
1338	PvP01_02_v1	72372	A	T	Moderate
1339	PvP01_02_v1	72379	T	A	Moderate
1340	PvP01_02_v1	72385	G	A	Moderate
1341	PvP01_02_v1	72402	A	G	Moderate
1342	PvP01_02_v1	72403	T	G	Moderate
1343	PvP01_02_v1	72409	C	T	Moderate
1344	PvP01_02_v1	72421	T	C	Moderate
1345	PvP01_02_v1	72432	C	T	Moderate
1346	PvP01_02_v1	72450	T	A	Moderate
1347	PvP01_02_v1	72640	G	T	Moderate
1348	PvP01_02_v1	72714	T	C	Moderate
1349	PvP01_02_v1	72737	A	T	Moderate
1350	PvP01_02_v1	72747	C	T	Moderate
1351	PvP01_02_v1	72749	C	G	Moderate
1352	PvP01_02_v1	72785	T	G	Moderate
1353	PvP01_02_v1	72886	A	C	Moderate
1354	PvP01_02_v1	72955	T	C	Moderate
1355	PvP01_02_v1	73275	G	T	Moderate
1356	PvP01_02_v1	73277	T	C	Moderate
1357	PvP01_02_v1	73287	C	G,T	Moderate
1358	PvP01_02_v1	73299	G	C	Moderate
1359	PvP01_02_v1	73307	G	T	Moderate
1360	PvP01_02_v1	73311	G	A	Moderate
1361	PvP01_02_v1	73315	A	C	Moderate
1362	PvP01_02_v1	73316	A	C	Moderate
1363	PvP01_02_v1	73317	T	C	Moderate
1364	PvP01_02_v1	76750	T	A	Moderate
1365	PvP01_02_v1	77293	G	A	Moderate
1366	PvP01_02_v1	77311	C	A	Moderate
1367	PvP01_02_v1	77322	T	C	Moderate
1368	PvP01_02_v1	77325	G	T,*	Moderate
1369	PvP01_02_v1	77374	C	T	Moderate
1370	PvP01_02_v1	77430	C	G	Moderate
1371	PvP01_02_v1	77440	T	C	Moderate
1372	PvP01_02_v1	77469	C	T	Moderate
1373	PvP01_02_v1	77480	T	A	Moderate
1374	PvP01_02_v1	77524	G	C	Moderate
1375	PvP01_02_v1	77526	T	C	Moderate
1376	PvP01_02_v1	77551	T	G	Moderate
1377	PvP01_02_v1	77587	T	G	Moderate
1378	PvP01_02_v1	77601	T	A	Moderate
1379	PvP01_02_v1	77613	T	C	Moderate
1380	PvP01_02_v1	77665	C	G	Moderate
1381	PvP01_02_v1	77710	T	A	Moderate
1382	PvP01_02_v1	77719	G	T	Moderate
1383	PvP01_02_v1	77720	T	A	Moderate
1384	PvP01_02_v1	77722	T	G	Moderate
1385	PvP01_02_v1	77731	T	G	Moderate
1386	PvP01_02_v1	77733	T	C	Moderate
1387	PvP01_02_v1	77734	C	T	Moderate
1388	PvP01_02_v1	77737	C	T	Moderate
1389	PvP01_02_v1	77742	A	G	Moderate
1390	PvP01_02_v1	77746	T	C	Moderate
1391	PvP01_02_v1	77749	T	G	Moderate
1392	PvP01_02_v1	77755	C	T	Moderate
1393	PvP01_02_v1	77756	A	T	Moderate
1394	PvP01_02_v1	77758	C	T	Moderate
1395	PvP01_02_v1	77764	T	C	Moderate
1396	PvP01_02_v1	77884	T	C	Moderate
1397	PvP01_02_v1	77888	C	A	Moderate
1398	PvP01_02_v1	77893	C	T	Moderate
1399	PvP01_02_v1	77914	T	C	Moderate
1400	PvP01_02_v1	78126	T	A	Moderate
1401	PvP01_02_v1	78144	A	T	Moderate
1402	PvP01_02_v1	78153	T	G	Moderate
1403	PvP01_02_v1	78177	A	G	Moderate
1404	PvP01_02_v1	82743	T	C	Moderate
1405	PvP01_02_v1	83185	G	A	Moderate
1406	PvP01_02_v1	83490	A	T	Moderate
1407	PvP01_02_v1	83495	T	C	Moderate
1408	PvP01_02_v1	83499	T	A	Moderate
1409	PvP01_02_v1	83501	T	C	Moderate
1410	PvP01_02_v1	83503	G	C	Moderate
1411	PvP01_02_v1	83504	C	T	Moderate
1412	PvP01_02_v1	83510	C	G	Moderate
1413	PvP01_02_v1	83525	T	C	Moderate
1414	PvP01_02_v1	83527	T	C	Moderate
1415	PvP01_02_v1	83531	G	T	Moderate
1416	PvP01_02_v1	83535	C	G	Moderate
1417	PvP01_02_v1	83557	A	T	Moderate
1418	PvP01_02_v1	83562	T	A	Moderate
1419	PvP01_02_v1	83736	A	T	Moderate
1420	PvP01_02_v1	83746	C	T	Moderate
1421	PvP01_02_v1	83755	C	T	Moderate
1422	PvP01_02_v1	83757	A	T	Moderate
1423	PvP01_02_v1	83758	T	G	Moderate
1424	PvP01_02_v1	83762	G	T	Moderate
1425	PvP01_02_v1	83782	C	T	Moderate
1426	PvP01_02_v1	83789	C	T	Moderate
1427	PvP01_02_v1	83839	T	C	Moderate
1428	PvP01_02_v1	83843	C	A	Moderate
1429	PvP01_02_v1	83845	T	C	Moderate
1430	PvP01_02_v1	83871	G	C	Moderate
1431	PvP01_02_v1	83896	G	T	Moderate
1432	PvP01_02_v1	83906	C	A	Moderate
1433	PvP01_02_v1	83926	T	G	Moderate
1434	PvP01_02_v1	83929	C	G	Moderate
1435	PvP01_02_v1	84220	C	T	Moderate
1436	PvP01_02_v1	84228	T	G	Moderate
1437	PvP01_02_v1	89095	C	T	Moderate
1438	PvP01_02_v1	89178	A	G	Moderate
1439	PvP01_02_v1	89185	T	C	Moderate
1440	PvP01_02_v1	89234	A	C	Moderate
1441	PvP01_02_v1	89467	T	A	Moderate
1442	PvP01_02_v1	89491	C	G	Moderate
1443	PvP01_02_v1	89492	C	T	Moderate
1444	PvP01_02_v1	89552	T	C	Moderate
1445	PvP01_02_v1	89570	G	T	Moderate
1446	PvP01_02_v1	89583	C	A	Moderate
1447	PvP01_02_v1	89609	G	T	Moderate
1448	PvP01_02_v1	89624	T	C	Moderate
1449	PvP01_02_v1	89663	G	T	Moderate
1450	PvP01_02_v1	89670	T	A	Moderate
1451	PvP01_02_v1	89681	T	G	Moderate
1452	PvP01_02_v1	89682	A	T	Moderate
1453	PvP01_02_v1	89689	C	T	Moderate
1454	PvP01_02_v1	89698	G	T	Moderate
1455	PvP01_02_v1	89710	G	T	Moderate
1456	PvP01_02_v1	89729	T	G	Moderate
1457	PvP01_02_v1	89798	T	G	Moderate
1458	PvP01_02_v1	89802	C	A	Moderate
1459	PvP01_02_v1	89990	T	C	Moderate
1460	PvP01_02_v1	89992	T	G	Moderate
1461	PvP01_02_v1	90002	G	T	Moderate
1462	PvP01_02_v1	90034	C	T	Moderate
1463	PvP01_02_v1	94531	G	A	Moderate
1464	PvP01_02_v1	94549	G	T	Moderate
1465	PvP01_02_v1	94820	T	A	Moderate
1466	PvP01_02_v1	94954	C	T	Moderate
1467	PvP01_02_v1	94976	G	T	Moderate
1468	PvP01_02_v1	95002	C	T	Moderate
1469	PvP01_02_v1	95021	T	C	Moderate
1470	PvP01_02_v1	95023	C	T	Moderate
1471	PvP01_02_v1	95049	T	G	Moderate
1472	PvP01_02_v1	95062	T	C	Moderate
1473	PvP01_02_v1	95114	C	T	Moderate
1474	PvP01_02_v1	95134	T	G	Moderate
1475	PvP01_02_v1	95141	T	C	Moderate
1476	PvP01_02_v1	95142	C	G	Moderate
1477	PvP01_02_v1	95150	A	T	Moderate
1478	PvP01_02_v1	95152	T	C	Moderate
1479	PvP01_02_v1	95233	T	C	Moderate
1480	PvP01_02_v1	95237	A	T	Moderate
1481	PvP01_02_v1	95250	C	A	Moderate
1482	PvP01_02_v1	95251	C	G	Moderate
1483	PvP01_02_v1	95263	G	T	Moderate
1484	PvP01_02_v1	95283	C	A	Moderate
1485	PvP01_02_v1	95292	A	T	Moderate
1486	PvP01_02_v1	95293	C	T	Moderate
1487	PvP01_02_v1	95306	T	G	Moderate
1488	PvP01_02_v1	95334	C	A	Moderate
1489	PvP01_02_v1	100512	T	C	Moderate
1490	PvP01_02_v1	100513	G	C	Moderate
1491	PvP01_02_v1	100691	C	A	Moderate
1492	PvP01_02_v1	100695	A	C	Moderate
1493	PvP01_02_v1	100698	A	G	Moderate
1494	PvP01_02_v1	101296	C	G,*	Moderate
1495	PvP01_02_v1	101590	A	T	Moderate
1496	PvP01_02_v1	101650	C	T	Moderate
1497	PvP01_02_v1	101673	C	A	Moderate
1498	PvP01_02_v1	101716	T	C	Moderate
1499	PvP01_02_v1	105701	G	C	Moderate
1500	PvP01_02_v1	111361	G	A	Moderate
1501	PvP01_02_v1	111478	G	A	Moderate
1502	PvP01_02_v1	117182	G	C	Moderate
1503	PvP01_02_v1	117736	T	G	Moderate
1504	PvP01_02_v1	117981	C	T	Moderate
1505	PvP01_02_v1	118542	C	*,T	Moderate
1506	PvP01_02_v1	118544	G	*,A	Moderate
1507	PvP01_02_v1	118550	G	A,*	Moderate
1508	PvP01_02_v1	118566	T	C,*	Moderate
1509	PvP01_02_v1	118568	A	G,*	Moderate
1510	PvP01_02_v1	118574	A	G,*	Moderate
1511	PvP01_02_v1	118735	T	A	Moderate
1512	PvP01_02_v1	121123	C	A	Moderate
1513	PvP01_02_v1	121144	G	T	Moderate
1514	PvP01_02_v1	121345	T	C	Moderate
1515	PvP01_02_v1	126725	C	A	Moderate
1516	PvP01_02_v1	126809	G	A	Moderate
1517	PvP01_02_v1	126988	T	A	Moderate
1518	PvP01_02_v1	134488	C	T,*	Moderate
1519	PvP01_02_v1	136427	T	G	Moderate
1520	PvP01_02_v1	136434	C	A	Moderate
1521	PvP01_02_v1	136435	A	G	Moderate
1522	PvP01_02_v1	136443	G	C	Moderate
1523	PvP01_02_v1	136455	C	G	Moderate
1524	PvP01_02_v1	136460	C	A	Moderate
1525	PvP01_02_v1	136463	G	C	Moderate
1526	PvP01_02_v1	137025	C	G	Moderate
1527	PvP01_02_v1	154492	T	C	Moderate
1528	PvP01_02_v1	154747	C	A	Moderate
1529	PvP01_02_v1	156208	C	G	Moderate
1530	PvP01_02_v1	157229	T	A	Moderate
1531	PvP01_02_v1	158148	C	G	Moderate
1532	PvP01_02_v1	158272	A	C	Moderate
1533	PvP01_02_v1	158323	T	G	Moderate
1534	PvP01_02_v1	158545	C	T	Moderate
1535	PvP01_02_v1	169658	C	A	Moderate
1536	PvP01_02_v1	170223	C	G	Moderate
1537	PvP01_02_v1	176343	G	A	Moderate
1538	PvP01_02_v1	180258	G	A	Moderate
1539	PvP01_02_v1	180411	C	A	Moderate
1540	PvP01_02_v1	180676	C	A	Moderate
1541	PvP01_02_v1	182041	G	A	Moderate
1542	PvP01_02_v1	186317	C	T	Moderate
1543	PvP01_02_v1	186448	G	T	Moderate
1544	PvP01_02_v1	190799	A	G	Moderate
1545	PvP01_02_v1	191400	A	G	Moderate
1546	PvP01_02_v1	191966	G	C	Moderate
1547	PvP01_02_v1	196402	G	C	Moderate
1548	PvP01_02_v1	196628	C	G	Moderate
1549	PvP01_02_v1	196630	C	G	Moderate
1550	PvP01_02_v1	197206	T	C	Moderate
1551	PvP01_02_v1	197402	C	G	Moderate
1552	PvP01_02_v1	197593	A	G	Moderate
1553	PvP01_02_v1	197835	T	A	Moderate
1554	PvP01_02_v1	197845	T	G	Moderate
1555	PvP01_02_v1	198066	A	C	Moderate
1556	PvP01_02_v1	198112	C	T	Moderate
1557	PvP01_02_v1	198202	G	A	Moderate
1558	PvP01_02_v1	199563	G	A,*	Moderate
1559	PvP01_02_v1	199644	C	G	Moderate
1560	PvP01_02_v1	200858	A	G	Moderate
1561	PvP01_02_v1	200867	G	A	Moderate
1562	PvP01_02_v1	201830	C	A	Moderate
1563	PvP01_02_v1	201842	G	A	Moderate
1564	PvP01_02_v1	211541	C	G	Moderate
1565	PvP01_02_v1	212449	C	T	Moderate
1566	PvP01_02_v1	213140	G	C	Moderate
1567	PvP01_02_v1	213436	C	G	Moderate
1568	PvP01_02_v1	213965	C	A	Moderate
1569	PvP01_02_v1	214056	T	G	Moderate
1570	PvP01_02_v1	214110	C	T	Moderate
1571	PvP01_02_v1	214701	G	A	Moderate
1572	PvP01_02_v1	214755	T	C	Moderate
1573	PvP01_02_v1	214939	C	G	Moderate
1574	PvP01_02_v1	215185	G	C	Moderate
1575	PvP01_02_v1	215276	G	C,*	Moderate
1576	PvP01_02_v1	215452	C	T	Moderate
1577	PvP01_02_v1	215587	C	T	Moderate
1578	PvP01_02_v1	215970	G	A	Moderate
1579	PvP01_02_v1	219449	G	C	Moderate
1580	PvP01_02_v1	220643	G	A	Moderate
1581	PvP01_02_v1	220667	G	A	Moderate
1582	PvP01_02_v1	222336	C	T	Moderate
1583	PvP01_02_v1	222356	C	T	Moderate
1584	PvP01_02_v1	222392	G	T	Moderate
1585	PvP01_02_v1	222608	C	T	Moderate
1586	PvP01_02_v1	226299	G	T	Moderate
1587	PvP01_02_v1	227572	C	G	Moderate
1588	PvP01_02_v1	227590	A	G	Moderate
1589	PvP01_02_v1	228521	G	A	Moderate
1590	PvP01_02_v1	229710	T	A	Moderate
1591	PvP01_02_v1	229872	T	C	Moderate
1592	PvP01_02_v1	233020	C	T	Moderate
1593	PvP01_02_v1	235513	T	C	Moderate
1594	PvP01_02_v1	236402	G	T	Moderate
1595	PvP01_02_v1	237445	C	T	Moderate
1596	PvP01_02_v1	237932	T	G	Moderate
1597	PvP01_02_v1	242224	G	A	Moderate
1598	PvP01_02_v1	244035	C	A	Moderate
1599	PvP01_02_v1	250396	C	A	Moderate
1600	PvP01_02_v1	251396	G	A	Moderate
1601	PvP01_02_v1	252130	G	C	Moderate
1602	PvP01_02_v1	254126	T	G	Moderate
1603	PvP01_02_v1	254471	C	T	Moderate
1604	PvP01_02_v1	254519	C	G	Moderate
1605	PvP01_02_v1	261107	G	C	Moderate
1606	PvP01_02_v1	262076	A	C	Moderate
1607	PvP01_02_v1	262943	C	A	Moderate
1608	PvP01_02_v1	262992	G	T	Moderate
1609	PvP01_02_v1	263293	G	C	Moderate
1610	PvP01_02_v1	263731	T	C	Moderate
1611	PvP01_02_v1	264603	A	G	Moderate
1612	PvP01_02_v1	266493	G	A	Moderate
1613	PvP01_02_v1	267883	C	T	Moderate
1614	PvP01_02_v1	272690	G	A	Moderate
1615	PvP01_02_v1	272722	C	T	Moderate
1616	PvP01_02_v1	272786	A	G	Moderate
1617	PvP01_02_v1	274834	G	C	Moderate
1618	PvP01_02_v1	274880	G	C	Moderate
1619	PvP01_02_v1	274991	C	G	Moderate
1620	PvP01_02_v1	275184	T	C	Moderate
1621	PvP01_02_v1	275185	C	G	Moderate
1622	PvP01_02_v1	276102	G	A	Moderate
1623	PvP01_02_v1	277662	C	A	Moderate
1624	PvP01_02_v1	279201	C	A	Moderate
1625	PvP01_02_v1	284494	G	C	Moderate
1626	PvP01_02_v1	284520	C	T	Moderate
1627	PvP01_02_v1	284568	G	A	Moderate
1628	PvP01_02_v1	284751	A	C	Moderate
1629	PvP01_02_v1	284901	C	T	Moderate
1630	PvP01_02_v1	285180	C	T	Moderate
1631	PvP01_02_v1	285669	G	C	Moderate
1632	PvP01_02_v1	285721	G	C	Moderate
1633	PvP01_02_v1	290660	C	A	Moderate
1634	PvP01_02_v1	290774	G	A	Moderate
1635	PvP01_02_v1	293032	T	G	Moderate
1636	PvP01_02_v1	293619	C	A	Moderate
1637	PvP01_02_v1	293622	C	T	Moderate
1638	PvP01_02_v1	293638	A	C	Moderate
1639	PvP01_02_v1	293781	G	C	Moderate
1640	PvP01_02_v1	295376	C	G	Moderate
1641	PvP01_02_v1	295660	C	G	Moderate
1642	PvP01_02_v1	295662	T	C	Moderate
1643	PvP01_02_v1	295663	C	G	Moderate
1644	PvP01_02_v1	295672	T	C,*	Moderate
1645	PvP01_02_v1	295677	C	A,*	Moderate
1646	PvP01_02_v1	295680	T	C,*	Moderate
1647	PvP01_02_v1	297539	G	C	Moderate
1648	PvP01_02_v1	297874	C	T	Moderate
1649	PvP01_02_v1	299814	G	A	Moderate
1650	PvP01_02_v1	300522	A	G	Moderate
1651	PvP01_02_v1	301200	A	C	Moderate
1652	PvP01_02_v1	302959	T	G	Moderate
1653	PvP01_02_v1	304907	C	A	Moderate
1654	PvP01_02_v1	305529	T	C	Moderate
1655	PvP01_02_v1	305760	C	G	Moderate
1656	PvP01_02_v1	305830	G	A	Moderate
1657	PvP01_02_v1	306025	A	G	Moderate
1658	PvP01_02_v1	307428	G	T	Moderate
1659	PvP01_02_v1	307655	G	T	Moderate
1660	PvP01_02_v1	308116	A	T	Moderate
1661	PvP01_02_v1	308593	C	T	Moderate
1662	PvP01_02_v1	317430	C	A	Moderate
1663	PvP01_02_v1	318946	G	C	Moderate
1664	PvP01_02_v1	318951	G	C	Moderate
1665	PvP01_02_v1	327451	G	A	Moderate
1666	PvP01_02_v1	327553	C	G	Moderate
1667	PvP01_02_v1	327617	A	C	Moderate
1668	PvP01_02_v1	327618	A	C	Moderate
1669	PvP01_02_v1	327682	T	G	Moderate
1670	PvP01_02_v1	327739	C	G	Moderate
1671	PvP01_02_v1	331438	T	C	Moderate
1672	PvP01_02_v1	332313	G	C	Moderate
1673	PvP01_02_v1	338593	C	A,*	Moderate
1674	PvP01_02_v1	338607	G	T,*	Moderate
1675	PvP01_02_v1	338671	C	A	Moderate
1676	PvP01_02_v1	339148	T	A	Moderate
1677	PvP01_02_v1	340128	G	T	Moderate
1678	PvP01_02_v1	340137	C	T	Moderate
1679	PvP01_02_v1	340143	G	T	Moderate
1680	PvP01_02_v1	340163	G	C	Moderate
1681	PvP01_02_v1	340164	T	G	Moderate
1682	PvP01_02_v1	340176	A	G	Moderate
1683	PvP01_02_v1	340178	A	C	Moderate
1684	PvP01_02_v1	342789	C	A	Moderate
1685	PvP01_02_v1	344187	G	A	Moderate
1686	PvP01_02_v1	345498	A	G	Moderate
1687	PvP01_02_v1	345594	C	T	Moderate
1688	PvP01_02_v1	345898	G	A	Moderate
1689	PvP01_02_v1	346058	C	A	Moderate
1690	PvP01_02_v1	346170	G	A	Moderate
1691	PvP01_02_v1	346494	G	A	Moderate
1692	PvP01_02_v1	347132	T	A	Moderate
1693	PvP01_02_v1	354231	G	A	Moderate
1694	PvP01_02_v1	354549	G	A	Moderate
1695	PvP01_02_v1	358266	A	C	Moderate
1696	PvP01_02_v1	362978	C	G	Moderate
1697	PvP01_02_v1	363494	G	A	Moderate
1698	PvP01_02_v1	365796	C	T	Moderate
1699	PvP01_02_v1	365829	G	A	Moderate
1700	PvP01_02_v1	366005	C	T	Moderate
1701	PvP01_02_v1	368498	C	T	Moderate
1702	PvP01_02_v1	369546	G	C	Moderate
1703	PvP01_02_v1	372611	C	T	Moderate
1704	PvP01_02_v1	372757	C	T	Moderate
1705	PvP01_02_v1	372908	T	A	Moderate
1706	PvP01_02_v1	373387	T	C	Moderate
1707	PvP01_02_v1	373744	T	C	Moderate
1708	PvP01_02_v1	374138	C	A	Moderate
1709	PvP01_02_v1	374163	G	C	Moderate
1710	PvP01_02_v1	374174	G	A	Moderate
1711	PvP01_02_v1	375287	G	T	Moderate
1712	PvP01_02_v1	375690	C	A	Moderate
1713	PvP01_02_v1	375878	C	T	Moderate
1714	PvP01_02_v1	376622	A	G	Moderate
1715	PvP01_02_v1	377249	C	T	Moderate
1716	PvP01_02_v1	377350	T	C	Moderate
1717	PvP01_02_v1	377716	C	A	Moderate
1718	PvP01_02_v1	378237	A	C	Moderate
1719	PvP01_02_v1	378238	C	T	Moderate
1720	PvP01_02_v1	378241	A	T	Moderate
1721	PvP01_02_v1	378262	T	A	Moderate
1722	PvP01_02_v1	378359	A	G	Moderate
1723	PvP01_02_v1	378383	A	G	Moderate
1724	PvP01_02_v1	385970	A	T	Moderate
1725	PvP01_02_v1	386186	A	G	Moderate
1726	PvP01_02_v1	387815	T	G	Moderate
1727	PvP01_02_v1	391478	C	G	Moderate
1728	PvP01_02_v1	391753	C	G	Moderate
1729	PvP01_02_v1	391807	C	G	Moderate
1730	PvP01_02_v1	393237	C	G	Moderate
1731	PvP01_02_v1	393400	G	A	Moderate
1732	PvP01_02_v1	393432	G	C	Moderate
1733	PvP01_02_v1	396649	G	A	Moderate
1734	PvP01_02_v1	400886	A	T	Moderate
1735	PvP01_02_v1	401516	G	A	Moderate
1736	PvP01_02_v1	401771	T	A	Moderate
1737	PvP01_02_v1	401867	T	C	Moderate
1738	PvP01_02_v1	402194	T	C	Moderate
1739	PvP01_02_v1	407988	G	C	Moderate
1740	PvP01_02_v1	408012	C	G	Moderate
1741	PvP01_02_v1	408727	T	C	Moderate
1742	PvP01_02_v1	409093	T	C	Moderate
1743	PvP01_02_v1	409461	C	G	Moderate
1744	PvP01_02_v1	409570	G	A	Moderate
1745	PvP01_02_v1	412934	A	T	Moderate
1746	PvP01_02_v1	415407	G	T	Moderate
1747	PvP01_02_v1	415490	T	C	Moderate
1748	PvP01_02_v1	416004	C	A	Moderate
1749	PvP01_02_v1	416893	G	C	Moderate
1750	PvP01_02_v1	419293	G	A	Moderate
1751	PvP01_02_v1	419360	G	T	Moderate
1752	PvP01_02_v1	422350	C	T	Moderate
1753	PvP01_02_v1	422851	C	T	Moderate
1754	PvP01_02_v1	423218	C	T	Moderate
1755	PvP01_02_v1	425038	A	G	Moderate
1756	PvP01_02_v1	429293	T	A	Moderate
1757	PvP01_02_v1	429493	A	C	Moderate
1758	PvP01_02_v1	429513	C	G	Moderate
1759	PvP01_02_v1	429585	G	A	Moderate
1760	PvP01_02_v1	429711	G	T	Moderate
1761	PvP01_02_v1	430000	G	A	Moderate
1762	PvP01_02_v1	430015	A	G	Moderate
1763	PvP01_02_v1	431990	G	T	Moderate
1764	PvP01_02_v1	432264	A	T	Moderate
1765	PvP01_02_v1	432395	C	A	Moderate
1766	PvP01_02_v1	432519	C	A	Moderate
1767	PvP01_02_v1	432874	C	T	Moderate
1768	PvP01_02_v1	433186	C	T	Moderate
1769	PvP01_02_v1	433197	C	G	Moderate
1770	PvP01_02_v1	433375	G	A	Moderate
1771	PvP01_02_v1	433579	T	C	Moderate
1772	PvP01_02_v1	433663	C	A	Moderate
1773	PvP01_02_v1	437373	T	C	Moderate
1774	PvP01_02_v1	439940	T	A	Moderate
1775	PvP01_02_v1	440701	A	T	Moderate
1776	PvP01_02_v1	440832	C	A	Moderate
1777	PvP01_02_v1	440870	G	T	Moderate
1778	PvP01_02_v1	440960	A	C	Moderate
1779	PvP01_02_v1	441095	T	G	Moderate
1780	PvP01_02_v1	441098	C	G	Moderate
1781	PvP01_02_v1	441259	T	C	Moderate
1782	PvP01_02_v1	448324	C	T	Moderate
1783	PvP01_02_v1	449872	T	C	Moderate
1784	PvP01_02_v1	449882	T	A	Moderate
1785	PvP01_02_v1	449884	T	C	Moderate
1786	PvP01_02_v1	449895	C	T	Moderate
1787	PvP01_02_v1	449900	T	A	Moderate
1788	PvP01_02_v1	449904	C	A,*	Moderate
1789	PvP01_02_v1	449910	T	C,*	Moderate
1790	PvP01_02_v1	449912	T	G,*	Moderate
1791	PvP01_02_v1	449955	T	C,*	Moderate
1792	PvP01_02_v1	449970	T	C,*	Moderate
1793	PvP01_02_v1	450181	C	G	Moderate
1794	PvP01_02_v1	451163	C	T	Moderate
1795	PvP01_02_v1	452212	G	A	Moderate
1796	PvP01_02_v1	453161	A	T	Moderate
1797	PvP01_02_v1	453623	T	G	Moderate
1798	PvP01_02_v1	455080	C	A	Moderate
1799	PvP01_02_v1	455170	T	A	Moderate
1800	PvP01_02_v1	456943	A	G	Moderate
1801	PvP01_02_v1	457186	C	A	Moderate
1802	PvP01_02_v1	457282	A	G	Moderate
1803	PvP01_02_v1	457661	C	G	Moderate
1804	PvP01_02_v1	458026	G	A	Moderate
1805	PvP01_02_v1	459259	G	C	Moderate
1806	PvP01_02_v1	459334	G	T	Moderate
1807	PvP01_02_v1	459470	T	C	Moderate
1808	PvP01_02_v1	459523	C	G	Moderate
1809	PvP01_02_v1	460016	A	G	Moderate
1810	PvP01_02_v1	460563	G	C	Moderate
1811	PvP01_02_v1	463685	T	C	Moderate
1812	PvP01_02_v1	464531	A	G	Moderate
1813	PvP01_02_v1	464827	T	A	Moderate
1814	PvP01_02_v1	465332	C	A	Moderate
1815	PvP01_02_v1	465454	G	T	Moderate
1816	PvP01_02_v1	466718	C	T	Moderate
1817	PvP01_02_v1	467012	T	C	Moderate
1818	PvP01_02_v1	467135	G	A	Moderate
1819	PvP01_02_v1	469768	C	G	Moderate
1820	PvP01_02_v1	473401	G	C	Moderate
1821	PvP01_02_v1	473659	T	C	Moderate
1822	PvP01_02_v1	474239	G	A	Moderate
1823	PvP01_02_v1	478104	G	A	Moderate
1824	PvP01_02_v1	478163	C	A	Moderate
1825	PvP01_02_v1	478202	G	C	Moderate
1826	PvP01_02_v1	478802	G	A	Moderate
1827	PvP01_02_v1	478821	T	C	Moderate
1828	PvP01_02_v1	479276	A	T	Moderate
1829	PvP01_02_v1	479739	G	A	Moderate
1830	PvP01_02_v1	480114	T	C	Moderate
1831	PvP01_02_v1	480258	A	T	Moderate
1832	PvP01_02_v1	480410	A	T	Moderate
1833	PvP01_02_v1	483586	G	A	Moderate
1834	PvP01_02_v1	485516	C	G	Moderate
1835	PvP01_02_v1	485872	A	C	Moderate
1836	PvP01_02_v1	486759	G	A	Moderate
1837	PvP01_02_v1	488462	C	T	Moderate
1838	PvP01_02_v1	488892	C	G	Moderate
1839	PvP01_02_v1	489420	G	C	Moderate
1840	PvP01_02_v1	492500	C	G	Moderate
1841	PvP01_02_v1	492617	A	G	Moderate
1842	PvP01_02_v1	492633	G	A	Moderate
1843	PvP01_02_v1	492642	C	A	Moderate
1844	PvP01_02_v1	493319	C	T	Moderate
1845	PvP01_02_v1	493324	T	A	Moderate
1846	PvP01_02_v1	493360	T	A	Moderate
1847	PvP01_02_v1	496452	C	T	Moderate
1848	PvP01_02_v1	496536	T	C	Moderate
1849	PvP01_02_v1	497334	C	T	Moderate
1850	PvP01_02_v1	497424	G	A	Moderate
1851	PvP01_02_v1	497813	T	C	Moderate
1852	PvP01_02_v1	499053	C	T	Moderate
1853	PvP01_02_v1	499217	C	T	Moderate
1854	PvP01_02_v1	499220	A	C	Moderate
1855	PvP01_02_v1	499223	A	T	Moderate
1856	PvP01_02_v1	499229	T	C	Moderate
1857	PvP01_02_v1	499256	C	A	Moderate
1858	PvP01_02_v1	499259	T	A	Moderate
1859	PvP01_02_v1	499261	A	C	Moderate
1860	PvP01_02_v1	499262	T	C	Moderate
1861	PvP01_02_v1	499265	C	T	Moderate
1862	PvP01_02_v1	499280	T	C	Moderate
1863	PvP01_02_v1	499991	C	G	Moderate
1864	PvP01_02_v1	500125	T	G	Moderate
1865	PvP01_02_v1	500325	G	A	Moderate
1866	PvP01_02_v1	501587	G	A	Moderate
1867	PvP01_02_v1	503560	G	C	Moderate
1868	PvP01_02_v1	504231	G	T,*	Moderate
1869	PvP01_02_v1	506606	C	*,T	Moderate
1870	PvP01_02_v1	506621	C	T,*	Moderate
1871	PvP01_02_v1	506642	C	T,*	Moderate
1872	PvP01_02_v1	506732	C	T	Moderate
1873	PvP01_02_v1	507042	C	A	Moderate
1874	PvP01_02_v1	508518	G	T	Moderate
1875	PvP01_02_v1	508723	C	G	Moderate
1876	PvP01_02_v1	509120	G	C	Moderate
1877	PvP01_02_v1	509135	T	C	Moderate
1878	PvP01_02_v1	513129	C	A	Moderate
1879	PvP01_02_v1	513403	A	G	Moderate
1880	PvP01_02_v1	513991	G	T	Moderate
1881	PvP01_02_v1	514268	C	T	Moderate
1882	PvP01_02_v1	514733	C	T	Moderate
1883	PvP01_02_v1	515261	T	C	Moderate
1884	PvP01_02_v1	515361	G	T	Moderate
1885	PvP01_02_v1	517201	T	C	Moderate
1886	PvP01_02_v1	520385	C	G	Moderate
1887	PvP01_02_v1	520934	T	A	Moderate
1888	PvP01_02_v1	527587	C	T	Moderate
1889	PvP01_02_v1	527662	G	A	Moderate
1890	PvP01_02_v1	527780	G	C	Moderate
1891	PvP01_02_v1	528717	A	G	Moderate
1892	PvP01_02_v1	528839	C	A	Moderate
1893	PvP01_02_v1	530587	A	C	Moderate
1894	PvP01_02_v1	536973	C	T	Moderate
1895	PvP01_02_v1	539021	T	C	Moderate
1896	PvP01_02_v1	543940	A	C	Moderate
1897	PvP01_02_v1	544051	C	A	Moderate
1898	PvP01_02_v1	545459	C	T	Moderate
1899	PvP01_02_v1	547490	C	A	Moderate
1900	PvP01_02_v1	551750	G	T	Moderate
1901	PvP01_02_v1	551804	A	G	Moderate
1902	PvP01_02_v1	551820	C	T	Moderate
1903	PvP01_02_v1	554053	G	A	Moderate
1904	PvP01_02_v1	554933	A	C	Moderate
1905	PvP01_02_v1	558114	T	C	Moderate
1906	PvP01_02_v1	558283	C	G	Moderate
1907	PvP01_02_v1	558555	A	C	Moderate
1908	PvP01_02_v1	558704	G	T	Moderate
1909	PvP01_02_v1	559650	C	A	Moderate
1910	PvP01_02_v1	560363	A	C	Moderate
1911	PvP01_02_v1	563227	G	A	Moderate
1912	PvP01_02_v1	564748	A	G	Moderate
1913	PvP01_02_v1	565858	C	A	Moderate
1914	PvP01_02_v1	571090	G	A	Moderate
1915	PvP01_02_v1	572305	A	G	Moderate
1916	PvP01_02_v1	572349	G	A	Moderate
1917	PvP01_02_v1	572524	A	G	Moderate
1918	PvP01_02_v1	574603	C	G	Moderate
1919	PvP01_02_v1	575069	C	A	Moderate
1920	PvP01_02_v1	575416	C	T	Moderate
1921	PvP01_02_v1	576069	T	A	Moderate
1922	PvP01_02_v1	583044	G	T	Moderate
1923	PvP01_02_v1	584779	T	C	Moderate
1924	PvP01_02_v1	585061	T	C	Moderate
1925	PvP01_02_v1	585686	G	C	Moderate
1926	PvP01_02_v1	586823	G	C	Moderate
1927	PvP01_02_v1	587019	C	G	Moderate
1928	PvP01_02_v1	587035	C	A	Moderate
1929	PvP01_02_v1	587038	C	G	Moderate
1930	PvP01_02_v1	589412	C	T	Moderate
1931	PvP01_02_v1	589717	C	A	Moderate
1932	PvP01_02_v1	590537	G	C	Moderate
1933	PvP01_02_v1	591158	A	G	Moderate
1934	PvP01_02_v1	591817	T	C	Moderate
1935	PvP01_02_v1	591870	T	G	Moderate
1936	PvP01_02_v1	593116	C	G	Moderate
1937	PvP01_02_v1	594499	G	A	Moderate
1938	PvP01_02_v1	598564	T	G	Moderate
1939	PvP01_02_v1	598667	G	C	Moderate
1940	PvP01_02_v1	598775	G	T	Moderate
1941	PvP01_02_v1	598817	G	A	Moderate
1942	PvP01_02_v1	599100	G	C	Moderate
1943	PvP01_02_v1	601898	A	G	Moderate
1944	PvP01_02_v1	605757	A	C	Moderate
1945	PvP01_02_v1	606238	A	G	Moderate
1946	PvP01_02_v1	607133	A	T	Moderate
1947	PvP01_02_v1	607144	G	A	Moderate
1948	PvP01_02_v1	607148	G	T	Moderate
1949	PvP01_02_v1	607349	T	A	Moderate
1950	PvP01_02_v1	608108	G	A	Moderate
1951	PvP01_02_v1	608274	C	A	Moderate
1952	PvP01_02_v1	609990	G	C	Moderate
1953	PvP01_02_v1	613006	A	C	Moderate
1954	PvP01_02_v1	616993	C	G	Moderate
1955	PvP01_02_v1	617389	G	T	Moderate
1956	PvP01_02_v1	617663	A	G	Moderate
1957	PvP01_02_v1	617977	C	A	Moderate
1958	PvP01_02_v1	618595	C	T	Moderate
1959	PvP01_02_v1	620269	C	G	Moderate
1960	PvP01_02_v1	621221	A	C	Moderate
1961	PvP01_02_v1	623065	C	T	Moderate
1962	PvP01_02_v1	624935	G	T	Moderate
1963	PvP01_02_v1	625363	C	A	Moderate
1964	PvP01_02_v1	625764	T	C	Moderate
1965	PvP01_02_v1	626368	T	C	Moderate
1966	PvP01_02_v1	626398	C	A	Moderate
1967	PvP01_02_v1	626574	G	C	Moderate
1968	PvP01_02_v1	627612	A	G,*	Moderate
1969	PvP01_02_v1	627624	A	G,*	Moderate
1970	PvP01_02_v1	627636	G	A	Moderate
1971	PvP01_02_v1	627676	T	C	Moderate
1972	PvP01_02_v1	627800	A	T	Moderate
1973	PvP01_02_v1	629257	A	T	Moderate
1974	PvP01_02_v1	629406	A	G	Moderate
1975	PvP01_02_v1	629836	G	A	Moderate
1976	PvP01_02_v1	630089	T	A	Moderate
1977	PvP01_02_v1	631530	G	A	Moderate
1978	PvP01_02_v1	631537	T	G	Moderate
1979	PvP01_02_v1	631555	A	T	Moderate
1980	PvP01_02_v1	631591	T	A	Moderate
1981	PvP01_02_v1	632357	T	A	Moderate
1982	PvP01_02_v1	635537	G	C	Moderate
1983	PvP01_02_v1	637325	G	T	Moderate
1984	PvP01_02_v1	637395	G	T	Moderate
1985	PvP01_02_v1	639583	G	A	Moderate
1986	PvP01_02_v1	642366	T	C	Moderate
1987	PvP01_02_v1	642716	T	G	Moderate
1988	PvP01_02_v1	643320	C	A	Moderate
1989	PvP01_02_v1	647140	C	T	Moderate
1990	PvP01_02_v1	648643	C	T	Moderate
1991	PvP01_02_v1	648645	G	C	Moderate
1992	PvP01_02_v1	657139	A	C	Moderate
1993	PvP01_02_v1	660049	A	G	Moderate
1994	PvP01_02_v1	660058	C	T	Moderate
1995	PvP01_02_v1	660061	G	A	Moderate
1996	PvP01_02_v1	660064	G	C	Moderate
1997	PvP01_02_v1	660371	G	A	Moderate
1998	PvP01_02_v1	660966	A	G	Moderate
1999	PvP01_02_v1	660995	C	G	Moderate
[truncated: 22,283 more rows]

## Sheet: Table 4
ID	Name	P-value	Benjamini	Bonferroni	Result gene list
GO:0005737	cytoplasm	1.31956e-34	6.94086e-32	6.94086e-32	PVP01_0102800,PVP01_0103300,PVP01_0105100,PVP01_0105500,PVP01_0107600,PVP01_0109100,PVP01_0109300,PVP01_0110100,PVP01_0111200,PVP01_0111950,PVP01_0112000,PVP01_0112300,PVP01_0112900,PVP01_0113000,PVP01_0113300,PVP01_0113600,PVP01_0114200,PVP01_0114300,PVP01_0116400,PVP01_0117000,PVP01_0118000,PVP01_0118200,PVP01_0203100,PVP01_0204100,PVP01_0205200,PVP01_0205300,PVP01_0205700,PVP01_0205800,PVP01_0…
GO:0005634	nucleus	8.33174e-24	2.19125e-21	4.38249e-21	PVP01_0105500,PVP01_0105600,PVP01_0106900,PVP01_0110800,PVP01_0111900,PVP01_0112800,PVP01_0112900,PVP01_0113300,PVP01_0113400,PVP01_0116400,PVP01_0117200,PVP01_0118100,PVP01_0204200,PVP01_0204400,PVP01_0206500,PVP01_0206900,PVP01_0207100,PVP01_0207600,PVP01_0208100,PVP01_0211100,PVP01_0212000,PVP01_0213100,PVP01_0214800,PVP01_0215200,PVP01_0216000,PVP01_0302600,PVP01_0303400,PVP01_0304200,PVP01_0…
GO:0044444	obsolete cytoplasmic part	1.63547e-20	2.86753e-18	8.60258e-18	PVP01_0105500,PVP01_0107600,PVP01_0111200,PVP01_0111950,PVP01_0112000,PVP01_0113000,PVP01_0114200,PVP01_0114300,PVP01_0118000,PVP01_0118200,PVP01_0205200,PVP01_0205800,PVP01_0207500,PVP01_0209300,PVP01_0209600,PVP01_0212700,PVP01_0212900,PVP01_0214900,PVP01_0215300,PVP01_0305700,PVP01_0307800,PVP01_0311500,PVP01_0315600,PVP01_0318400,PVP01_0320700,PVP01_0405600,PVP01_0407900,PVP01_0410700,PVP01_0…
GO:0044424	obsolete intracellular part	7.97781e-19	1.04908e-16	4.19633e-16	PVP01_0102800,PVP01_0109100,PVP01_0110100,PVP01_0112900,PVP01_0113300,PVP01_0116400,PVP01_0117000,PVP01_0203100,PVP01_0204100,PVP01_0205300,PVP01_0205700,PVP01_0205900,PVP01_0206900,PVP01_0211100,PVP01_0211800,PVP01_0212900,PVP01_0213100,PVP01_0213900,PVP01_0215200,PVP01_0215500,PVP01_0215600,PVP01_0215900,PVP01_0305400,PVP01_0306400,PVP01_0309000,PVP01_0309700,PVP01_0312000,PVP01_0312600,PVP01_0…
GO:0140513	nuclear protein-containing complex	5.75459e-10	6.05383e-08	3.02692e-07	PVP01_0103400,PVP01_0107800,PVP01_0109600,PVP01_0109900,PVP01_0116900,PVP01_0204700,PVP01_0205900,PVP01_0213800,PVP01_0303000,PVP01_0304800,PVP01_0308400,PVP01_0310400,PVP01_0311300,PVP01_0312200,PVP01_0313100,PVP01_0318200,PVP01_0320900,PVP01_0406300,PVP01_0406500,PVP01_0418600,PVP01_0505100,PVP01_0508000,PVP01_0511500,PVP01_0512000,PVP01_0512200,PVP01_0512700,PVP01_0514400,PVP01_0515300,PVP01_0…
GO:0012505	endomembrane system	9.72858e-10	8.52872e-08	5.11723e-07	PVP01_0105500,PVP01_0111200,PVP01_0112000,PVP01_0114300,PVP01_0205200,PVP01_0205800,PVP01_0211700,PVP01_0211900,PVP01_0212500,PVP01_0212700,PVP01_0304500,PVP01_0315600,PVP01_0405600,PVP01_0407700,PVP01_0410800,PVP01_0413300,PVP01_0413800,PVP01_0414900,PVP01_0420900,PVP01_0506500,PVP01_0509600,PVP01_0509900,PVP01_0511700,PVP01_0512500,PVP01_0513800,PVP01_0517800,PVP01_0521500,PVP01_0521900,PVP01_0…
GO:0031974	membrane-enclosed lumen	1.85358e-09	1.08331e-07	9.74983e-07	PVP01_0103400,PVP01_0105500,PVP01_0108100,PVP01_0109900,PVP01_0111300,PVP01_0117100,PVP01_0204700,PVP01_0205400,PVP01_0307800,PVP01_0308500,PVP01_0311300,PVP01_0312200,PVP01_0313100,PVP01_0315800,PVP01_0317000,PVP01_0318300,PVP01_0321000,PVP01_0405400,PVP01_0412400,PVP01_0412500,PVP01_0416600,PVP01_0418600,PVP01_0420200,PVP01_0421400,PVP01_0506500,PVP01_0507400,PVP01_0508000,PVP01_0509700,PVP01_0…
GO:0070013	intracellular organelle lumen	1.85358e-09	1.08331e-07	9.74983e-07	PVP01_0103400,PVP01_0105500,PVP01_0108100,PVP01_0109900,PVP01_0111300,PVP01_0117100,PVP01_0204700,PVP01_0205400,PVP01_0307800,PVP01_0308500,PVP01_0311300,PVP01_0312200,PVP01_0313100,PVP01_0315800,PVP01_0317000,PVP01_0318300,PVP01_0321000,PVP01_0405400,PVP01_0412400,PVP01_0412500,PVP01_0416600,PVP01_0418600,PVP01_0420200,PVP01_0421400,PVP01_0506500,PVP01_0507400,PVP01_0508000,PVP01_0509700,PVP01_0…
GO:0043233	organelle lumen	1.85358e-09	1.08331e-07	9.74983e-07	PVP01_0103400,PVP01_0105500,PVP01_0108100,PVP01_0109900,PVP01_0111300,PVP01_0117100,PVP01_0204700,PVP01_0205400,PVP01_0307800,PVP01_0308500,PVP01_0311300,PVP01_0312200,PVP01_0313100,PVP01_0315800,PVP01_0317000,PVP01_0318300,PVP01_0321000,PVP01_0405400,PVP01_0412400,PVP01_0412500,PVP01_0416600,PVP01_0418600,PVP01_0420200,PVP01_0421400,PVP01_0506500,PVP01_0507400,PVP01_0508000,PVP01_0509700,PVP01_0…
GO:0005739	mitochondrion	2.60619e-09	1.37085e-07	1.37085e-06	PVP01_0107600,PVP01_0111950,PVP01_0113000,PVP01_0207500,PVP01_0209300,PVP01_0209600,PVP01_0212900,PVP01_0215300,PVP01_0307800,PVP01_0311500,PVP01_0318400,PVP01_0320700,PVP01_0407900,PVP01_0410700,PVP01_0411600,PVP01_0411700,PVP01_0412700,PVP01_0418100,PVP01_0419100,PVP01_0420600,PVP01_0508900,PVP01_0509100,PVP01_0510600,PVP01_0512400,PVP01_0514100,PVP01_0518900,PVP01_0519900,PVP01_0520000,PVP01_0…
GO:0005829	cytosol	4.56956e-08	1.98007e-06	2.40359e-05	PVP01_0103300,PVP01_0118000,PVP01_0118200,PVP01_0212700,PVP01_0214900,PVP01_0305700,PVP01_0315400,PVP01_0317300,PVP01_0410900,PVP01_0411000,PVP01_0415100,PVP01_0415700,PVP01_0416000,PVP01_0421000,PVP01_0510000,PVP01_0512600,PVP01_0521400,PVP01_0521500,PVP01_0526600,PVP01_0528000,PVP01_0529900,PVP01_0610200,PVP01_0611100,PVP01_0611900,PVP01_0612000,PVP01_0616500,PVP01_0705900,PVP01_0709100,PVP01_0…
GO:0043657	host cell	4.89371e-08	1.98007e-06	2.57409e-05	PVP01_0100900,PVP01_0101000,PVP01_0102600,PVP01_0119200,PVP01_0119300,PVP01_0119400,PVP01_0119500,PVP01_0119600,PVP01_0120700,PVP01_0201200,PVP01_0202300,PVP01_0202400,PVP01_0202500,PVP01_0202600,PVP01_0203200,PVP01_0206700,PVP01_0207200,PVP01_0210500,PVP01_0210600,PVP01_0216700,PVP01_0216800,PVP01_0217100,PVP01_0217200,PVP01_0218600,PVP01_0218900,PVP01_0219000,PVP01_0219100,PVP01_0219200,PVP01_0…
GO:0018995	host cellular component	4.89371e-08	1.98007e-06	2.57409e-05	PVP01_0100900,PVP01_0101000,PVP01_0102600,PVP01_0119200,PVP01_0119300,PVP01_0119400,PVP01_0119500,PVP01_0119600,PVP01_0120700,PVP01_0201200,PVP01_0202300,PVP01_0202400,PVP01_0202500,PVP01_0202600,PVP01_0203200,PVP01_0206700,PVP01_0207200,PVP01_0210500,PVP01_0210600,PVP01_0216700,PVP01_0216800,PVP01_0217100,PVP01_0217200,PVP01_0218600,PVP01_0218900,PVP01_0219000,PVP01_0219100,PVP01_0219200,PVP01_0…
GO:0031981	nuclear lumen	1.68701e-07	6.33835e-06	8.87369e-05	PVP01_0103400,PVP01_0105500,PVP01_0108100,PVP01_0109900,PVP01_0117100,PVP01_0204700,PVP01_0205400,PVP01_0307800,PVP01_0308500,PVP01_0311300,PVP01_0312200,PVP01_0313100,PVP01_0315800,PVP01_0317000,PVP01_0318300,PVP01_0321000,PVP01_0405400,PVP01_0412400,PVP01_0412500,PVP01_0416600,PVP01_0418600,PVP01_0421400,PVP01_0507400,PVP01_0508000,PVP01_0515500,PVP01_0516900,PVP01_0602200,PVP01_0605600,PVP01_0…
GO:0140535	intracellular protein-containing complex	2.6057e-07	9.13731e-06	0.00013706	PVP01_0112600,PVP01_0112900,PVP01_0116400,PVP01_0204700,PVP01_0206900,PVP01_0213100,PVP01_0213800,PVP01_0311300,PVP01_0312200,PVP01_0313100,PVP01_0319300,PVP01_0418600,PVP01_0419200,PVP01_0419600,PVP01_0507800,PVP01_0520100,PVP01_0522000,PVP01_0525500,PVP01_0527900,PVP01_0603100,PVP01_0615600,PVP01_0705900,PVP01_0706200,PVP01_0709900,PVP01_0711300,PVP01_0713600,PVP01_0727500,PVP01_0730500,PVP01_0…
GO:0031090	organelle membrane	5.58061e-07	1.72671e-05	0.00029354	PVP01_0107500,PVP01_0109300,PVP01_0111200,PVP01_0112000,PVP01_0113600,PVP01_0211700,PVP01_0211900,PVP01_0212500,PVP01_0212600,PVP01_0212700,PVP01_0304500,PVP01_0318400,PVP01_0407700,PVP01_0410800,PVP01_0413300,PVP01_0414300,PVP01_0414900,PVP01_0420200,PVP01_0420900,PVP01_0505200,PVP01_0509600,PVP01_0510600,PVP01_0511700,PVP01_0513800,PVP01_0517500,PVP01_0521900,PVP01_0528600,PVP01_0608100,PVP01_0…
GO:1990904	ribonucleoprotein complex	5.58061e-07	1.72671e-05	0.00029354	PVP01_0109900,PVP01_0111300,PVP01_0116900,PVP01_0117100,PVP01_0214700,PVP01_0215100,PVP01_0303000,PVP01_0304800,PVP01_0308400,PVP01_0311500,PVP01_0312600,PVP01_0315400,PVP01_0317300,PVP01_0318200,PVP01_0406300,PVP01_0406500,PVP01_0416600,PVP01_0421400,PVP01_0505100,PVP01_0509500,PVP01_0511500,PVP01_0512000,PVP01_0512600,PVP01_0512800,PVP01_0514400,PVP01_0515500,PVP01_0516900,PVP01_0519700,PVP01_0…
GO:0043228	non-membrane-bounded organelle	8.18799e-07	2.39271e-05	0.000430688	PVP01_0105900,PVP01_0106500,PVP01_0106600,PVP01_0108100,PVP01_0109900,PVP01_0111000,PVP01_0111300,PVP01_0116500,PVP01_0117000,PVP01_0117100,PVP01_0204100,PVP01_0205400,PVP01_0205700,PVP01_0206000,PVP01_0210900,PVP01_0213900,PVP01_0214800,PVP01_0215500,PVP01_0215600,PVP01_0306100,PVP01_0307800,PVP01_0308500,PVP01_0310100,PVP01_0310200,PVP01_0311500,PVP01_0313800,PVP01_0314100,PVP01_0315300,PVP01_0…
GO:0043232	intracellular non-membrane-bounded organelle	9.00817e-07	2.49384e-05	0.00047383	PVP01_0105900,PVP01_0106500,PVP01_0106600,PVP01_0108100,PVP01_0109900,PVP01_0111000,PVP01_0111300,PVP01_0116500,PVP01_0117000,PVP01_0117100,PVP01_0204100,PVP01_0205400,PVP01_0205700,PVP01_0206000,PVP01_0210900,PVP01_0213900,PVP01_0214800,PVP01_0215500,PVP01_0215600,PVP01_0306100,PVP01_0307800,PVP01_0308500,PVP01_0310100,PVP01_0310200,PVP01_0311500,PVP01_0313800,PVP01_0314100,PVP01_0315300,PVP01_0…
GO:0005783	endoplasmic reticulum	1.53607e-06	4.03986e-05	0.000807972	PVP01_0105500,PVP01_0111200,PVP01_0114300,PVP01_0205200,PVP01_0205800,PVP01_0211900,PVP01_0212500,PVP01_0405600,PVP01_0410800,PVP01_0413300,PVP01_0414900,PVP01_0420900,PVP01_0506500,PVP01_0509600,PVP01_0509900,PVP01_0511700,PVP01_0512500,PVP01_0513800,PVP01_0517800,PVP01_0521500,PVP01_0526200,PVP01_0527900,PVP01_0606100,PVP01_0617600,PVP01_0621200,PVP01_0702800,PVP01_0707700,PVP01_0712600,PVP01_0…
GO:0045177	apical part of cell	5.98776e-06	0.000149979	0.00314956	PVP01_0102800,PVP01_0107500,PVP01_0112200,PVP01_0210600,PVP01_0210900,PVP01_0303700,PVP01_0303800,PVP01_0304100,PVP01_0304600,PVP01_0305300,PVP01_0317100,PVP01_0317400,PVP01_0317900,PVP01_0318800,PVP01_0410000,PVP01_0411100,PVP01_0414300,PVP01_0418400,PVP01_0418900,PVP01_0505600,PVP01_0517600,PVP01_0521100,PVP01_0521400,PVP01_0529100,PVP01_0531900,PVP01_0532400,PVP01_0534400,PVP01_0602300,PVP01_0…
GO:0044217	other organism part	6.61379e-06	0.00015813	0.00347885	PVP01_0100900,PVP01_0101000,PVP01_0119200,PVP01_0119300,PVP01_0119400,PVP01_0119600,PVP01_0120700,PVP01_0201200,PVP01_0202300,PVP01_0202400,PVP01_0202500,PVP01_0202600,PVP01_0216800,PVP01_0217100,PVP01_0217200,PVP01_0218600,PVP01_0218900,PVP01_0219000,PVP01_0219100,PVP01_0219200,PVP01_0219300,PVP01_0300100,PVP01_0300700,PVP01_0300800,PVP01_0300900,PVP01_0301000,PVP01_0301500,PVP01_0301600,PVP01_0…
GO:0020007	apical complex	3.51664e-05	0.000804241	0.0184975	PVP01_0102800,PVP01_0107500,PVP01_0112200,PVP01_0303700,PVP01_0303800,PVP01_0304600,PVP01_0305300,PVP01_0317100,PVP01_0317400,PVP01_0317900,PVP01_0410000,PVP01_0411100,PVP01_0414300,PVP01_0418400,PVP01_0418900,PVP01_0505600,PVP01_0517600,PVP01_0521100,PVP01_0521400,PVP01_0529100,PVP01_0532400,PVP01_0602300,PVP01_0613800,PVP01_0615300,PVP01_0623800,PVP01_0701100,PVP01_0701200,PVP01_0702000,PVP01_0…
GO:0005856	cytoskeleton	4.05991e-05	0.000885957	0.0213551	PVP01_0116500,PVP01_0117000,PVP01_0204100,PVP01_0205700,PVP01_0210900,PVP01_0213900,PVP01_0215500,PVP01_0215600,PVP01_0313800,PVP01_0420700,PVP01_0505700,PVP01_0517000,PVP01_0528400,PVP01_0530800,PVP01_0605300,PVP01_0608300,PVP01_0702100,PVP01_0703700,PVP01_0704900,PVP01_0708000,PVP01_0723400,PVP01_0725300,PVP01_0730900,PVP01_0732200,PVP01_0732500,PVP01_0808400,PVP01_0820800,PVP01_0823900,PVP01_0…
GO:0005575	cellular component	4.21082e-05	0.000885957	0.0221489	PVP01_0112000,PVP01_0117700,PVP01_0303800,PVP01_0304300,PVP01_0304700,PVP01_0312700,PVP01_0315200,PVP01_0414200,PVP01_0414900,PVP01_0415800,PVP01_0415900,PVP01_0420400,PVP01_0505200,PVP01_0520500,PVP01_0531600,PVP01_0602500,PVP01_0605100,PVP01_0606800,PVP01_0607500,PVP01_0607900,PVP01_0612700,PVP01_0612900,PVP01_0614500,PVP01_0616000,PVP01_0616100,PVP01_0621200,PVP01_0623800,PVP01_0706500,PVP01_0…

## Sheet: Table 5
Gene	Gen ID	Position	Strain	Size
			Vietnam IV
circumsporozoite (CS) protein	PVP01_0835600	38	G	366
thrombospondin-related anonymous protein, putative (TRAP)	PVP01_1218700	120	S	559
		122	S
		134	E
		160	I
		166	T
		172	K
		186	I
		206	P
		268	G
		336	R
		410	K
		464	A
cell traversal protein for ookinetes and sporozoites (CelTOS)	PVP01_1435400	118	M	199
		178	K
		181	L
merozoite surface protein 1 paralog (MSP1P)	PVP01_0728800	133	Q	1860
		517	K
		755	I
		1536	K
		1750	D
merozoite surface protein 1 (MSP1)	PVP01_0728900	53	N	1737
		56	K
		82	L
		242	V
		546	T
		571	N
		602	T
		603	V
		647	I
		654	G
		726	Q
		727	Q
		780	I
		1069	F
		1213	N
		1437	I
		1549	S
merozoite surface protein 3 (MSP3.10)	PVP01_1031000	4	P	851
		173	E
		347	N
		350	K
		780	K
		826	D
merozoite surface protein 3 (MSP3.3)	PVP01_1031500	-	-	787
merozoite surface protein 9 (MSP9)	PVP01_1446800	122	G	897
		215	Q
		402	K
		409	D
		506	D
		607	H
		679	T
		788	A
		843	S
		844	A
duffy binding protein (DBP)	PVP01_0623800	17	S	1082
		146	E
		175	E
		263	S
		288	F
		322	I
		330	D
		339	G
		340	K
		341	N
		345	H
		372	K
		379	I
		392	R
		458	K
		488	V
		576	Q
		609	K
		764	E
		934	D
		967	R
		988	N
		993	H
rRNA-processing protein EBP2, putative (EBP2)	PVP01_0613400	235	L	400
apical membrane antigen 1 (AMA1)	PVP01_0934200	25	Q	565
		66	R
		112	K
		140	L
		141	E
		145	A
		210	P
		277	K
		288	E
		352	K
		380	R
		384	P
		438	H
		445	N
40S ribosomal protein S25, putative	PVP01_1327700	-	-	108
ookinete surface protein P28, putative (P28)	PVP01_0616000	52	M	239
		87	D
		110	N
		140	T
6-cysteine protein P47 (P47)	PVP01_1208000	82	L	437
		230	V
		233	I
		240	D
		262	I
		373	A
6-cysteine protein P48/45	PVP01_1208100	211	N	453
		250	N
		330	G
		335	D
		376	A
		418	R
6-cysteine protein P230, putative (P230)	PVP01_0415800	102	C	2728
		213	F
		264	A
		285	I
		430	V
		720	D
		1356	S
male gamete fusion factor HAP2 (HAP2)	PVP01_0814300	133	S	865
		592	K
		637	N
		742	A
		798	K
gamete egress and sporozoite traversal protein, putative (GEST)	PVP01_1258000	16	L	252
conserved Plasmodium protein, unknown function	PVP01_0617800	207	G	626
small heat shock protein HSP20, putative (HSP20)	PVP01_0518800	-	-	174
Inhibitor of cysteine proteases, putative (ICP)	PVP01_0710400	123	N	367
		298	G
PI31 domain-containing protein, putative	PVP01_0810200	-	-	298
There is not difference between strains (-)
This table represents the amino acid variation in immunogenic targets of P. vivax Vietnam-IV compared with P. vivax PV01 reference strain.
